# Supplementary material for: Annual high-resolution grazing-intensity maps on the Qinghai–Tibet Plateau from 1990 to 2020
Source: Copernicus journal article supplement (doi:10.5194/essd-16-5171-2024), 2024-11-07
Supplement: Supplementary file 1 [file essd-16-5171-2024-supplement.pdf]

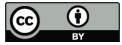

*Supplement of*

## **Annual high-resolution grazing-intensity maps on the Qinghai–Tibet Plateau from 1990 to 2020**

**Jia Zhou et al.**

*Correspondence to:* Tao Lu ([lutao@cib.ac.cn](mailto:lutao@cib.ac.cn))

The copyright of individual parts of the supplement might differ from the article licence.

## Supplementary information

10 There is a conspicuous absence of a systematic database with superior spatio-temporal  
11 resolution, including population density, temperature, precipitation, and Human-activity-induced  
12 Net Primary Productivity (HNPP). The lack of such a comprehensive dataset significantly  
13 compromises the empirical robustness of research endeavors in the domain of livestock  
14 distribution mapping. Consequently, this study is committed to providing precise and detailed  
15 mappings that integrate the aforementioned elements. The subsequent section demonstrated the  
16 database and the methodologies employed to generate these comprehensive maps.

### 17 **Population density database**

#### 18 *Data source*

19 The gridded annual population data with a resolution of 100 m spanning from 2000 to 2020  
20 (referred to as Pop I) for this study were acquired from the WorldPop dataset  
21 (<https://hub.worldpop.org>, accessed on 5 January 2023). Concurrently, the gridded population data  
22 at 1 km resolution with five-year intervals for the period of 1990-2015 (referred to as Pop II) were  
23 obtained from the Resource and Environment Science and Data center of the Chinese Academy of  
24 Sciences (<https://www.resdc.cn>, accessed on 9 January 2023). Moreover, the demographic data  
25 spanning the years 1990-2000 were extracted from the statistical yearbooks of the respective  
26 provinces.

#### 27 *Data processing*

28 All collected gridded population data were meticulously geo-referenced to the  
29 WGS\_1984\_Albers Equal-Area Conic coordinate system, and were subsequently clipped by the  
30 comprehensive boundary of the entire Qinghai-Tibetan Plateau (QTP). Furthermore, the Pop II  
31 dataset was disaggregated to a 100 m resolution to maintain consistency. Given the inherent  
32 disparities between the Pop I and Pop II datasets—originating from distinct demographic data and  
33 divergent methodologies—an integration process was required to prevent data breakage and  
34 ensure continuity across datasets. In this study, for the overlapping year of 2000-2015, both Pop I  
35 and Pop II data were harmoniously amalgamated to construct a linear regression model, according  
36 to the formula 1~3. Subsequently, consistent gridded population data with a spatial resolution of  
37  $100\text{ m} \times 100\text{ m}$ , were generated by linear extrapolation for the years 1990 to 1999, undergoing  
38 stringent quality control procedures utilizing the acquired demographic data. Thus, a  
39 comprehensive set of population distribution maps with a spatial resolution of  $100\text{ m} \times 100\text{ m}$   
40 were successfully acquired, covering 31 years from 1990 to 2020.

41 
$$y = ax + b \quad (1)$$

42 
$$a = \frac{\sum_{i=1}^n (x_i - \bar{x})(y_i - \bar{y})}{\sum_{i=1}^n (x_i - \bar{x})^2} \quad (2)$$

43 
$$b = \bar{y} - a\bar{x} \quad (3)$$

44 where  $y$  is Pop I,  $X$  is Pop II, and  $n$  is the number of samples.

## 45 **Climate database**

### 46 *Data source*

47 In the present study, the mean daily temperature and precipitation data of 228 meteorological  
48 stations in the QTP and its surrounding areas during 1990-2020 were obtained from China  
49 Meteorological Data Service Center (<http://data.cma.cn>, accessed on 4 January 2023). The quality  
50 and uniformity of the acquired data were assessed and validated by the National Meteorological  
51 Information Center, ensuring the reliability and consistency of the datasets in use.

### 52 *Data processing*

53 To avoid the influence of anomalous values, average values were selected for interpolation of  
54 air temperature, while interpolation of precipitation incorporated total values (Bryan and Adams,  
55 2002). Subsequent to the exclusion of abnormal data, the annual average temperature and the  
56 annual cumulative precipitation for each station were ascertained. Previous studies reveals that  
57 both the ANUSPLIN and Co-Kriging methodologies are typically conducive to generating robust  
58 and reliable estimations for climatic data (Parra and Monahan, 2008; Cho et al., 2020; Tan et al.,  
59 2021). Consequently, after comparing the results from all possible parameter combinations, eight  
60 models were constructed with three independent variables, including altitude, slope, and aspect, as  
61 detailed in Table S1.

62 The ANUSPLIN model serves as an advanced interpolation technique, proficient in generating  
63 geographically cohesive climate surfaces, utilizing both weather station data and topographical  
64 variables. This model is constructed employing thin-plate smoothing splines, demonstrating a  
65 notable suitability for interpolating climate data characterized by substantial noise, whilst  
66 maintaining a propensity to yield a mean error that is lower compared to alternate interpolation  
67 models (Price et al., 2000; Hutchinson et al., 2005). The theoretical framework underpinning this  
68 model is articulated through Formula (4), serving as a testament to its mathematical robustness  
69 and empirical reliability in addressing the complexities inherent to climatic data.

70 
$$Z_i = f(x_i) + b^T y_i + e_i \quad (i=1, \dots, n) \quad (4)$$

71 where  $Z_i$  represents the predicted value at location  $i$ ;  $x_i$  is the spline independent variable as a  
72 multidimensional vector, and  $f$  represents a smoothing function of  $x_i$  which needs to be estimated;  
73  $y_i$  is the independent covariable as a multidimensional vector, and  $b$  is the unknown coefficients

74 for the  $y_i$ ;  $n$  is the number of observational data. Each  $e_i$  is an independent, zero mean error term  
 75 with variance  $w_i\sigma^2$ , where  $w_i$  is the known relative error variance and  $\sigma^2$  is the error variance  
 76 which is constant across all data points.

77 Co-Kriging represents a sophisticated multivariate geo-statistical technique, functioning as an  
 78 advanced extension of the Ordinary Kriging method, and is adept at transitioning from a singular  
 79 spatial random variable to encompassing multiple spatially correlated random variables. This  
 80 technique incorporates multiple correlated datasets into the estimation process, typically resulting  
 81 in predictions characterized by enhanced accuracy (Tajgardan et al., 2010). The mathematical  
 82 theory underpinning Co-Kriging is delineated in Formula (5).

$$83 \quad Z^*(x_0) = \sum_{i=1}^{n_1} \beta_{1i}Z_1(x_{1i}) + \sum_{j=1}^{n_2} \beta_{2j}Z_2(x_{2j}) + \sum_{p=1}^{n_3} \beta_{3p}Z_3(x_{3p}) + \sum_{q=1}^{n_4} \beta_{4q}Z_4(x_{4q}) \quad (5)$$

84 where  $Z^*(X_0)$  is the simulated value of the point  $X_0$  to be evaluated, the measured climate value of  
 85  $Z_1(x_{1i})$  is taken as the main variable, and  $Z_2(x_{2j})$ ,  $Z_3(x_{3p})$  and  $Z_4(x_{4q})$  are taken as the covariates;  $\beta$   
 86 represents the weight;  $n$  represents the number of data;  $X_i$ ,  $X_j$ ,  $X_p$  and  $X_q$  represent the location,  
 87 and  $I = 1, 2, 3.. n1, j=1,2,3 \dots n2, p=1,2,3 \dots n3, q=1,2,3 \dots n4$ .

88 Table S1. Interpolation models using different combinations of covariates for prediction of air  
 89 temperature and precipitation.

| Climate       |        | ANUSPLIN                    |        | Co-Kriging                  |
|---------------|--------|-----------------------------|--------|-----------------------------|
| Temperature   | A-T-I  | CV: Altitude                | K-T-I  | CV: Altitude                |
|               | A-T-II | CV: Altitude; slope; aspect | K-T-II | CV: Altitude; slope; aspect |
| Precipitation | A-P-I  | CV: Altitude                | K-P-I  | CV: Altitude                |
|               | A-P-II | CV: Altitude; slope; aspect | K-P-II | CV: Altitude; slope; aspect |

90 Note: CV is an abbreviation for concomitant variable

### 91 *Model assessment*

92 To rigorously evaluate the efficacy of the eight models, we engaged in the construction and  
 93 assessment of all predictive models utilizing repeated 10-fold cross-validation (Yoo et al., 2018).  
 94 This method systematically divided the original observation data from the 228 meteorological  
 95 stations into ten equitably sized subsamples. Nine of these subsamples were deployed in the  
 96 training process, subsequently generating predictions on the remaining subsample. This  
 97 cross-validation process was then repeated a further nine times, ensuring each observation was  
 98 exclusively used once as validation data. Hence, ten distinctive combinations of training and test  
 99 sets were established, with each pair undergoing comprehensive application and evaluation. The  
 100 conclusive assessment of the 10-fold cross-validation was derived from the average error across  
 101 the ten test sets, culminating in a singular, consolidated estimate.

102 The mean absolute error (MAE) and the root mean square error (RMSE) were employed as  
 103 evaluation metrics to quantify the discrepancies between the forecasted data and the actual  
 104 observed data, serving as indicators of model performance. The MAE and RMSE were computed  
 105 for 56,544 (228×31×8) samples, as detailed in Table S2, to systematically assess the accuracy of  
 106 the models. The optimal model was adjudged based on the relative minimization of both MAE and  
 107 RMSE during the modeling and forecasting stages. The results indicated that the A-T-II model  
 108 exhibited superior performance in predicting temperature, whereas the K-P-I model demonstrated  
 109 paramount accuracy in forecasting precipitation. Consequently, the A-T-II and K-P-I models were  
 110 deployed to construct the annual temperature and precipitation maps of the QTP spanning the  
 111 period from 1990 to 2020, as illustrated in Figure S2.

112 Table S2. Model performance for the response prediction models

| Climate      | Temperature |        |       |        | Precipitation |         |        |        |
|--------------|-------------|--------|-------|--------|---------------|---------|--------|--------|
| Models       | A-T-I       | A-T-II | K-T-I | K-T-II | A-P-I         | A-P-II  | K-P-I  | K-P-II |
| Test samples | 7068        | 7068   | 7068  | 7068   | 7068          | 7068    | 7068   | 7068   |
| MAE          | 1.506       | 0.998  | 1.89  | 1.91   | 109.509       | 110.614 | 99.05  | 99.47  |
| RMSE         | 2.75        | 1.551  | 2.54  | 2.55   | 172.770       | 175.483 | 147.28 | 147.68 |

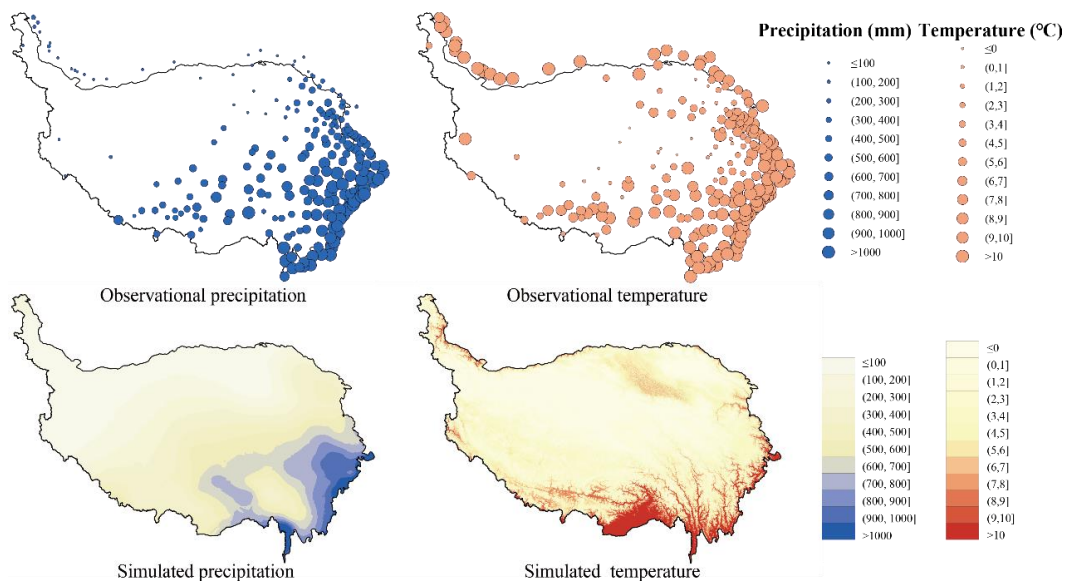

113  
 114 Figure S1. Distribution of mean cumulative precipitation and mean temperature in the QTP as  
 115 predicted by K-P-I and A-T-II model, respectively

## 116 Human-activity-induced Net Primary Productivity (HNPP) database

### 117 Data source

118 The MOD17A3HGF Version 006 NPP product (referred to as NPP-I) with 500 m resolution  
 119 covering 2000 to 2020 were obtained from the Land Processes Distributed Active Archive Center

120 (<https://lpdaac.usgs.gov>, accessed on 18 January 2023). Additionally, the actual NPP dataset  
 121 during 1990-2015 at 1 km resolution (referred to as NPP-II) was derived from the Global Change  
 122 Research Data Publishing and Repository (<http://www.geodoi.ac.cn>, accessed on 22 January  
 123 2023).

124 *Data processing.*

125 To reconcile the discrepancies inherent between NPP-I and NPP-II datasets, an initial  
 126 re-projection to the WGS\_1984\_Albers Equal-Area Conic coordinate system was undertaken.  
 127 Subsequently, the resolution of NPP-II was resampled to 500-m through the employment of the  
 128 nearest neighbor resampling algorithm. Based on the NPP-I and NPP-II data for the overlapping  
 129 year of 2000-2015, a linear regression correction equation was established in accordance with  
 130 formula 1~3. Consequently, the consistent gridded NPP data (referred to as NPP-III) at 500 m ×  
 131 500 m spatial resolution from 1990 to 2000 was generated.

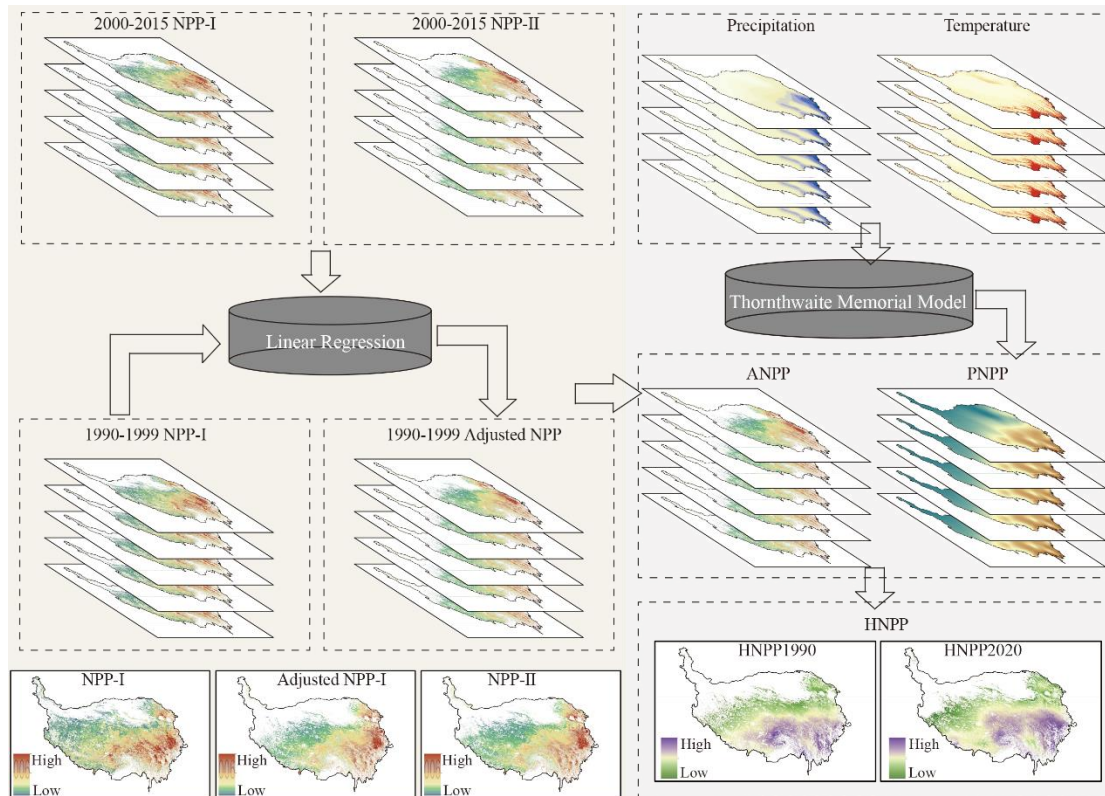

132

133

Figure S2. Technical flowchart for mapping the HNPP on the QTP

134 Human-induced NPP (HNPP) is delineated by the discrepancy between the climate-driven  
 135 potential NPP (PNPP) and the actual NPP (ANPP). In this study, the NPP-III data epitomize the  
 136 ANPP, elucidating the extant conditions of vegetative growth. To estimate the PNPP, the  
 137 Thornthwaite Memorial model was utilized, incorporating temperature and precipitation as  
 138 determining variables (Naeem et al., 2020; Qin et al., 2021). Subsequently, the differentiation  
 139 between PNPP and ANPP was performed to manifest the influence of human activities on NPP.

140 HNPP values in the negative spectrum indicate gains in NPP attributable to anthropogenic  
141 activities, while positive values represent losses in NPP due to human interventions. The  
142 computations for PNPP and HNPP were conducted as outlined below:

$$143 \quad PNPP = 3000[1 - e^{-0.009695(v-20)}] \quad (6)$$

$$144 \quad v = \frac{1.05r}{\sqrt{1+(1+\frac{1.05r}{L})^2}} \quad (7)$$

$$145 \quad L = 3000 + 25t + 0.05t^3 \quad (8)$$

$$146 \quad HNPP = PNPP - ANPP \quad (9)$$

147 where PNPP represents the total annual potential NPP ( $\text{g C m}^{-2}$ ),  $v$  represents the annual mean  
148 actual evapotranspiration (mm),  $L$  represents the annual mean potential evapotranspiration (mm),  $r$   
149 represents the annual precipitation (mm) and  $t$  represents the average annual temperature ( $^{\circ}\text{C}$ ).

## 150 **Machine Learning Methods**

### 151 *Support vector regression*

152 Support vector regression (SV) extends the concepts of support vector machines to regression  
153 problems (Cortes and Vapnik, 1995). It functions by establishing a hyperplane that predicts  
154 continuous outputs while minimizing errors between predicted and actual values. Key elements in  
155 SV include the margin and support vectors. The margin provides a tolerance for error, and the  
156 support vectors are essential data points dictating the hyperplane's position. Notably effective for  
157 high-dimensional feature spaces, SV is adept at handling nonlinear relationships (Smola and  
158 Schölkopf, 2004), making it highly relevant in advanced geographic data analysis.

### 159 *K-nearest neighbors*

160 K-nearest neighbors (KNN) is a proximity-based algorithm that predicts data point values based  
161 on their nearest neighbors (Cover and Hart, 1967; Bermejo and Cabestany, 2000). Unique for  
162 requiring no explicit model training, KNN calculates the distance between features, making it  
163 flexible and suitable for small datasets where other models' assumptions may not apply. KNN is  
164 straightforward and easy to implement, but its performance heavily depends on the quality and  
165 dimensionality of the dataset.

### 166 *Gradient boosting regression*

167 Gradient boosting regression (GB) is an ensemble learning technique constructing decision  
168 trees in sequence, each designed to rectify the errors of the previous (Friedman, 2001). Employing  
169 gradient descent to minimize the loss function, GB enhances flexibility and accuracy in data  
170 modeling, excelling at handling complex nonlinear relationships. It has demonstrated excellent

171 performance in many real-world problems, especially with large datasets.

## 172 *Random Forests*

173 Random forests (RF) is an ensemble learning technique enhancing accuracy and robustness by  
174 building multiple trees and aggregating their predictions (Breiman, 2001). Each tree in RF is  
175 trained on a random subset of the dataset, reducing the risk of overfitting. RF is particularly  
176 effective in handling datasets with complex interactions and non-linearities (Ahmad et al., 2018).

## 177 *Extra trees regression*

178 Extra trees regression (ET) algorithm is a machine learning technique evolved from the random  
179 forests model (Geurts et al., 2006). It introduces more randomness in decision tree construction,  
180 and selects split points randomly rather than seeking optimal splits. This method builds more trees  
181 in the process to improve prediction accuracy and to lower overfitting risks. Unlike the random  
182 forests algorithm, ET utilizes the entire training dataset to train each regression tree, thereby  
183 reducing variance and enhancing generalization. This makes ET particularly effective for large and  
184 high-dimensional datasets (Ahmad et al., 2018).

## 185 **Validation datasets**

186 In this study, both the township-level census livestock data and the pixel-level observed  
187 livestock data were used for validation of the GDGI maps. Specifically, the township-level census  
188 livestock data involves 18 townships with a total of 112 records, which were collected from  
189 government documents. The validation data at the pixel scale also encompass a total of 112  
190 records from 68 sites, which were collected from literatures, questionnaires and field surveys. The  
191 detailed information for the validation datasets can be seen from Figure S3 and Table S3.

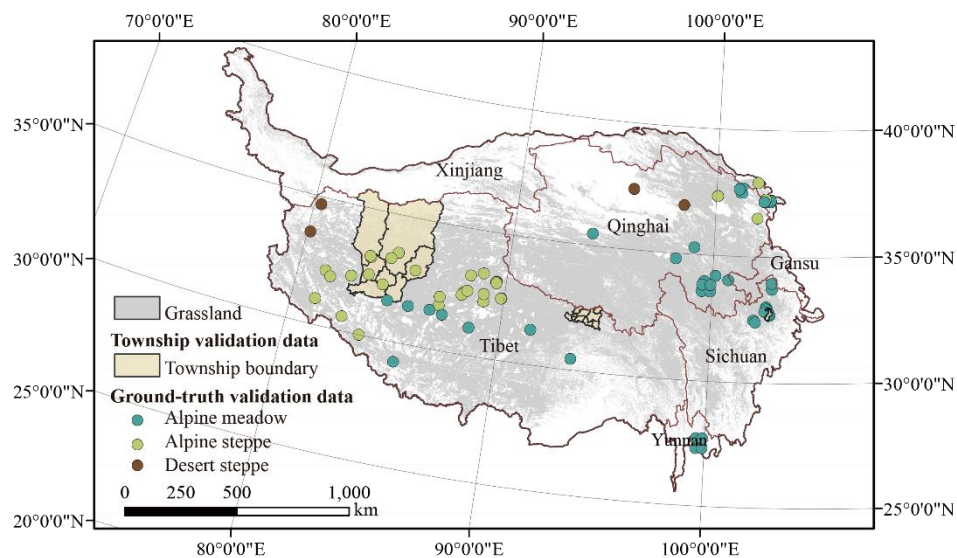

192

193 Figure S3. Spatial distribution of township validation data and ground-truth validation data.



Table S3. Summary of the ground-truth validation data from questionnaires, governmental documents and literatures.

| Longitude       | Latitude      | Grazing intensity                                  | Mean grazing intensity (Sheep/hm <sup>2</sup> ) | Grassland types | Source                 | Time      |
|-----------------|---------------|----------------------------------------------------|-------------------------------------------------|-----------------|------------------------|-----------|
| 89.8618         | 32.4513       | 0.009 Sheep/hm <sup>2</sup>                        | 0.009                                           | AS              | Questionnaires         | 2021      |
| 89.8696         | 32.4541       | 0.005 Sheep/hm <sup>2</sup>                        | 0.005                                           | AS              | Questionnaires         | 2021      |
| 89.8500         | 32.4497       | 0.101 Sheep/hm <sup>2</sup>                        | 0.101                                           | AS              | Questionnaires         | 2021      |
| 88.0284         | 32.4546       | 0.167 Sheep/hm <sup>2</sup>                        | 0.167                                           | AS              | Questionnaires         | 2021      |
| 89.5161         | 33.0806       | 0.021 Sheep/hm <sup>2</sup>                        | 0.021                                           | AS              | Questionnaires         | 2021      |
| 89.5261         | 33.0745       | 0.001 Sheep/hm <sup>2</sup>                        | 0.001                                           | AS              | Questionnaires         | 2021      |
| 87.9553         | 32.3468       | 0.196 Sheep/hm <sup>2</sup>                        | 0.196                                           | AS              | Questionnaires         | 2021      |
| 89.5039         | 33.0643       | 0.073 Sheep/hm <sup>2</sup>                        | 0.073                                           | AS              | Questionnaires         | 2021      |
| 89.5169         | 33.0152       | 0.015 Sheep/hm <sup>2</sup>                        | 0.015                                           | AS              | Questionnaires         | 2021      |
| 84.5724         | 33.5086       | 0.138 Sheep/hm <sup>2</sup>                        | 0.138                                           | AS              | Questionnaires         | 2021      |
| 84.5764         | 33.5173       | 0.168 Sheep/hm <sup>2</sup>                        | 0.168                                           | AS              | Questionnaires         | 2021      |
| 83.2922         | 33.1169       | 0.013 Sheep/hm <sup>2</sup>                        | 0.013                                           | AS              | Questionnaires         | 2021      |
| 83.3174         | 33.1207       | 0.321 Sheep/hm <sup>2</sup>                        | 0.321                                           | AS              | Questionnaires         | 2021      |
| 83.2653         | 33.1603       | 0.014 Sheep/hm <sup>2</sup>                        | 0.014                                           | AS              | Questionnaires         | 2021      |
| 102.013-102.171 | 32.289-32.569 | 49660 Sheep unit                                   | 2.222                                           | AM              | Governmental documents | 2008      |
| 101.993-102.122 | 32.384-32.626 | 34950 Sheep unit                                   | 1.766                                           | AM              | Governmental documents | 2008      |
| 102.475-102.819 | 32.957-33.137 | 83936 Sheep unit                                   | 2.983                                           | AM              | Governmental documents | 2008      |
| 102.616-102.934 | 32.468-32.971 | 74860 Sheep unit                                   | 1.705                                           | AM              | Governmental documents | 2008      |
| 102.650-102.967 | 32.563-32.995 | 92840 Sheep unit                                   | 2.318                                           | AM              | Governmental documents | 2008      |
| 93.5000         | 30.4500       | NG:0/MG:1.875/HG:2.78<br>(Sheep/ hm <sup>2</sup> ) | 1.552                                           | AM              | (Xu et al., 2012)      | 2010-2011 |

|          |         |                                                                              |       |    |                        |           |
|----------|---------|------------------------------------------------------------------------------|-------|----|------------------------|-----------|
| 102.5810 | 32.8331 | 0.52/1.016/1.284/1.668 (Sheep/ hm <sup>2</sup> )                             | 5.610 | AM | (Tserang et al., 2016) | 2014      |
| 102.5200 | 37.2800 | 1.64 Sheep/hm <sup>2</sup>                                                   | 1.640 | AS | (Shi et al., 2013)     | 2002-2010 |
| 100.0667 | 37.3500 | NG:0/LG:1.72/MLG:2.29/MG:2.87/<br>MHG:4.13/HG:5.62 (Sheep/ hm <sup>2</sup> ) | 2.772 | AS | (Chu et al., 2019)     | 2010-2015 |
| 101.1667 | 37.6500 | LG:2.55/HG:5.35 (Sheep/ hm <sup>2</sup> )                                    | 3.950 | AM | (Cao et al., 2004)     | 1985-1999 |
| 102.4600 | 37.1800 | G:7-8 NG:0 (Sheep/ hm <sup>2</sup> )                                         | 4.000 | AM | (Wang et al., 2020)    | 2005-2017 |
| 80.1440  | 33.5344 | NG                                                                           | 0     | DS | (Meng et al., 2023)    | 2021      |
| 80.3398  | 34.6949 | NG                                                                           | 0     | DS | (Meng et al., 2023)    | 2021      |
| 84.2821  | 33.2489 | NG                                                                           | 0     | AS | (Meng et al., 2023)    | 2021      |
| 85.5507  | 32.9491 | NG                                                                           | 0     | AS | (Meng et al., 2023)    | 2021      |
| 83.3801  | 32.4206 | NG                                                                           | 0     | AS | (Meng et al., 2023)    | 2021      |
| 81.3056  | 32.1976 | NG                                                                           | 0     | AS | (Meng et al., 2023)    | 2021      |
| 81.1381  | 31.0308 | NG                                                                           | 0     | AS | (Meng et al., 2023)    | 2021      |
| 82.5525  | 30.5754 | NG                                                                           | 0     | AS | (Meng et al., 2023)    | 2021      |
| 83.5271  | 30.0013 | NG                                                                           | 0     | AS | (Meng et al., 2023)    | 2021      |
| 86.9538  | 31.7750 | NG                                                                           | 0     | AS | (Meng et al., 2023)    | 2021      |
| 81.5937  | 32.0056 | NG                                                                           | 0     | AS | (Meng et al., 2023)    | 2021      |
| 82.5718  | 32.2185 | NG                                                                           | 0     | AS | (Meng et al., 2023)    | 2021      |
| 84.1376  | 32.1522 | NG                                                                           | 0     | AS | (Meng et al., 2023)    | 2021      |
| 84.5005  | 31.5758 | NG                                                                           | 0     | AM | (Meng et al., 2023)    | 2021      |
| 85.5255  | 31.5193 | NG                                                                           | 0     | AM | (Meng et al., 2023)    | 2021      |
| 86.5660  | 31.5314 | NG                                                                           | 0     | AM | (Meng et al., 2023)    | 2021      |
| 86.9267  | 32.1150 | NG                                                                           | 0     | AS | (Meng et al., 2023)    | 2021      |
| 87.1824  | 31.4253 | NG                                                                           | 0     | AM | (Meng et al., 2023)    | 2021      |
| 88.5406  | 31.1014 | NG                                                                           | 0     | AM | (Meng et al., 2023)    | 2021      |

|                 |               |                                                           |       |    |                     |           |
|-----------------|---------------|-----------------------------------------------------------|-------|----|---------------------|-----------|
| 88.1928         | 32.5347       | NG                                                        | 0     | AS | (Meng et al., 2023) | 2021      |
| 88.2523         | 33.1545       | NG                                                        | 0     | AS | (Meng et al., 2023) | 2021      |
| 85.3522         | 29.2292       | NG                                                        | 0     | AM | (Meng et al., 2023) | 2021      |
| 89.0365         | 32.2235       | NG                                                        | 0     | AS | (Meng et al., 2023) | 2021      |
| 88.9974         | 32.5153       | NG                                                        | 0     | AS | (Meng et al., 2023) | 2021      |
| 88.8447         | 33.3245       | NG                                                        | 0     | AS | (Meng et al., 2023) | 2021      |
| 91.4499         | 31.3858       | NG                                                        | 0     | AM | (Meng et al., 2023) | 2021      |
| 95.7602         | 37.3968       | NG                                                        | 0     | DS | (Meng et al., 2023) | 2021      |
| 93.8996         | 35.4687       | NG                                                        | 0     | AM | (Meng et al., 2023) | 2021      |
| 98.3783         | 36.9244       | NG                                                        | 0     | DS | (Meng et al., 2023) | 2021      |
| 99.0157         | 35.2812       | NG                                                        | 0     | AM | (Meng et al., 2023) | 2021      |
| 101.213-101.381 | 37.480-37.751 | G:3.51 NG:0 (Sheep/ hm <sup>2</sup> )                     | 1.755 | AM | (Zou et al., 2016)  | 2005      |
| 102.125-103.771 | 36.521-37.922 | NG:0 MG:4.86 HG: 6.08<br>(Sheep/ hm <sup>2</sup> )        | 3.647 | AM | (Li et al., 2015)   | 2010-2014 |
| 99.601-99.892   | 27.331-27.720 | NG:0 CG:3.5 GR:3.5<br>(Sheep/ hm <sup>2</sup> )           | 2.333 | AM | (Lang et al., 2021) | 2011      |
| 99.506-99.911   | 33.573-33.822 | 1.26 (Sheep/ hm <sup>2</sup> )                            | 1.260 | AM | (Dong et al., 2014) | 1998-2000 |
| 102.660-102.781 | 37.181-37.230 | 2.75/3.63/4.36/4.78/5.19/7.2<br>(Sheep/ hm <sup>2</sup> ) | 4.652 | AM | (Niu et al., 2018)  | 2012-2015 |
| 100.561-102.130 | 34.751-35.530 | LG:0.95 MG:2.65 HG:7.1<br>(Sheep/ hm <sup>2</sup> )       | 3.567 | AM | (Li et al., 2018)   | 2016      |
| 99.934-99.308   | 34.009-35.617 | 338400 Sheep unit                                         | 0.152 | AM | (Yu et al., 2021)   | 2018      |
| 99.461-99.781   | 33.757-34.184 | 51800 Sheep unit                                          | 0.606 | AM | (Gu and Zhou, 2020) | 2018      |
| 99.620-100.406  | 33.393-34.410 | 223100 Sheep unit                                         | 1.590 | AM | (Gu and Zhou, 2020) | 2018      |
| 100.576-100.877 | 33.879-34.246 | 166900 Sheep unit                                         | 2.876 | AM | (Gu and Zhou, 2020) | 2018      |

|                 |               |                            |       |    |                       |      |
|-----------------|---------------|----------------------------|-------|----|-----------------------|------|
| 95.401-101.649  | 33.106-37.477 | 0.9 Sheep/ hm <sup>2</sup> | 0.900 | AM | (Wu et al., 2021)     | 2017 |
| 102.802-102.977 | 33.883-34.026 | 50180 Sheep unit           | 4.001 | AM | (Zhuang et al., 2019) | 2014 |
| 102.822-103.016 | 33.627-33.835 | 91000 Sheep unit           | 3.778 | AM | (Zhuang et al., 2019) | 2014 |

195 **Note:** **G:** Grazing; **GR:** Grazing Rest; **NG:** No Grazing; **LG:** Light Grazing; **MG:** Moderate Grazing; **MLG:** Moderate Light Grazing; **MHG:** Moderate Heavy  
196 Grazing; **HG:** Heavy Grazing; **CG:** Continuous Grazing.  
197

Table S4. Information for sample data in grazing intensity modeling (Utilizing sklearn.model\_selection for train-test data splitting in Python)

| NO. | Altitude   | Slope    | River       | Precipitation | Temperature | Population | HNPP       | GI-Census(Log) |
|-----|------------|----------|-------------|---------------|-------------|------------|------------|----------------|
| 1   | 4446.90152 | 20.43149 | 11006.43992 | 770.45115     | 3.50504     | 0.01630    | 917.63410  | 0.24204        |
| 2   | 3770.28849 | 9.61628  | 8339.14135  | 537.13063     | 0.04115     | 0.04908    | 511.12892  | 0.51675        |
| 3   | 5001.44076 | 7.74284  | 14791.45433 | 165.85065     | -2.33546    | 0.00174    | 236.51765  | 0.07044        |
| 4   | 2903.17984 | 16.52171 | 14819.15033 | 482.85342     | 4.19267     | 0.19979    | 472.12443  | 0.74271        |
| 5   | 5113.12414 | 10.95940 | 14450.81322 | 128.26504     | 0.48100     | 0.00239    | 159.01233  | 0.16180        |
| 6   | 2924.23004 | 24.91102 | 7038.98535  | 567.45789     | 6.04342     | 0.16518    | 390.99603  | 0.92462        |
| 7   | 3895.67986 | 13.42678 | 11277.98388 | 363.69126     | -1.60045    | 0.03262    | 383.03021  | 0.38149        |
| 8   | 4399.20601 | 6.55008  | 7976.83163  | 301.44693     | -2.76176    | 0.00269    | 407.55275  | 0.10408        |
| 9   | 4888.34198 | 9.38470  | 12650.10673 | 419.59899     | 3.37497     | 0.01821    | 626.26893  | 0.26780        |
| 10  | 3864.32265 | 24.38751 | 6318.52530  | 951.28458     | 4.55532     | 0.02054    | 902.22597  | 0.71049        |
| 11  | 3118.94490 | 15.65389 | 6723.93485  | 376.98985     | 2.02617     | 0.01529    | 349.00571  | 0.28136        |
| 12  | 3487.69070 | 18.86305 | 18731.23211 | 397.47683     | -0.51635    | 0.05043    | 335.59765  | 1.68134        |
| 13  | 4477.05225 | 21.03200 | 9253.04522  | 535.91400     | 2.96043     | 0.04643    | 688.07608  | 0.34109        |
| 14  | 4877.06651 | 16.84761 | 8582.25708  | 438.52231     | 3.45691     | 0.05628    | 578.07802  | 0.33517        |
| 15  | 4059.02316 | 19.79821 | 15623.81309 | 79.83006      | 3.73931     | 0.01716    | 43.91666   | 1.06909        |
| 16  | 2896.45573 | 16.42350 | 14610.96038 | 444.55866     | 3.93272     | 0.18171    | 382.22515  | 0.64863        |
| 17  | 3338.74606 | 24.30527 | 11591.42467 | 447.92464     | 3.76303     | 0.06516    | 316.09493  | 0.48510        |
| 18  | 4552.82016 | 17.75626 | 8429.78755  | 363.43741     | 1.17927     | 0.02670    | 462.07952  | 0.31255        |
| 19  | 4046.46223 | 9.26426  | 11319.31895 | 174.17217     | -0.31321    | 0.00827    | 197.78352  | 0.17766        |
| 20  | 3807.13648 | 25.62871 | 7378.74657  | 88.18474      | 5.04975     | 0.00631    | 37.99118   | 1.28572        |
| 21  | 4677.36459 | 18.91047 | 12312.45501 | 654.19702     | 2.99837     | 0.04386    | 823.36585  | 0.38494        |
| 22  | 4957.65466 | 6.62716  | 10614.12073 | 397.62929     | -3.05608    | 0.00615    | 579.37226  | 0.19741        |
| 23  | 4052.85072 | 9.04663  | 11530.25892 | 252.16538     | -1.98410    | 0.00631    | 342.52216  | 0.12117        |
| 24  | 4672.07309 | 16.64215 | 17913.94075 | 410.79052     | 3.67608     | 0.08547    | 563.82705  | 0.47060        |
| 25  | 4687.98650 | 13.73783 | 9807.12273  | 430.75445     | 4.20260     | 0.02153    | 538.47848  | 0.24659        |
| 26  | 3854.66063 | 13.90955 | 11325.54119 | 352.24327     | -1.16001    | 0.03577    | 366.38780  | 0.49083        |
| 27  | 4607.69968 | 22.31451 | 8622.89579  | 639.65712     | 2.28363     | 0.06153    | 781.87546  | 0.35652        |
| 28  | 4523.82042 | 20.86194 | 11807.67970 | 746.59722     | 4.67632     | 0.01680    | 896.62669  | 0.30509        |
| 29  | 3625.40015 | 23.27223 | 5151.50669  | 663.11759     | 7.93027     | 0.08417    | 682.10846  | 0.45454        |
| 30  | 4888.51509 | 19.85724 | 11149.23429 | 300.62776     | 3.87022     | 0.06530    | 393.80276  | 0.38955        |
| 31  | 3644.85375 | 23.95199 | 10466.56382 | 1584.40960    | 6.67028     | 0.04681    | 1325.53359 | 1.13865        |
| 32  | 4844.57505 | 15.30717 | 9382.30551  | 389.13571     | 1.52752     | 0.02496    | 564.37303  | 0.31485        |
| 33  | 3425.64280 | 24.54749 | 7993.34112  | 51.30005      | 4.00438     | 0.00891    | 10.16623   | 1.96626        |
| 34  | 4556.01583 | 22.53164 | 12895.51729 | 685.95674     | 5.32661     | 0.02437    | 840.76989  | 0.39400        |
| 35  | 4478.71176 | 21.02706 | 9267.76533  | 543.45040     | 3.22512     | 0.04653    | 713.93142  | 0.29488        |
| 36  | 3475.62196 | 13.91179 | 7303.12066  | 494.83019     | 2.47942     | 0.05638    | 441.33700  | 0.57810        |
| 37  | 4492.02394 | 15.12905 | 23375.09230 | 83.48786      | -1.24101    | 0.00026    | 60.49678   | 0.44449        |
| 38  | 4899.55448 | 16.87605 | 8791.49435  | 319.29671     | 1.76846     | 0.04729    | 400.78336  | 0.42886        |
| 39  | 4371.67200 | 20.47126 | 9895.07478  | 484.26034     | 2.23295     | 0.04200    | 526.65473  | 0.43310        |
| 40  | 4787.10961 | 22.26842 | 10671.48190 | 298.49400     | 2.65954     | 0.04879    | 337.49591  | 0.51326        |
| 41  | 4013.07971 | 9.86336  | 12322.53461 | 180.17236     | -1.57204    | 0.00339    | 190.98626  | 0.23629        |
| 42  | 4886.40282 | 9.34164  | 12599.12656 | 419.56983     | 2.16220     | 0.01982    | 627.98816  | 0.22017        |
| 43  | 4623.53280 | 7.72824  | 16800.19193 | 130.99845     | -3.43838    | 0.00002    | 166.61843  | 0.07346        |
| 44  | 4372.80351 | 20.42203 | 9915.83606  | 540.63964     | 2.73312     | 0.04921    | 614.84515  | 0.38109        |
| 45  | 4958.28571 | 6.65071  | 9530.13454  | 355.37533     | -2.11523    | 0.00611    | 503.33810  | 0.19387        |
| 46  | 3380.32022 | 9.62268  | 6930.55262  | 408.50182     | 2.38924     | 0.06102    | 421.79446  | 0.53246        |
| 47  | 4333.71413 | 17.21727 | 8152.26370  | 468.14700     | 3.54024     | 0.04346    | 434.22047  | 0.40122        |
| 48  | 4339.13611 | 16.11054 | 9338.45563  | 421.95098     | 5.75737     | 0.10431    | 584.07742  | 0.46658        |
| 49  | 3392.64069 | 11.70084 | 7590.21202  | 511.09524     | 1.56615     | 0.08480    | 439.88825  | 0.59589        |
| 50  | 3754.58569 | 12.28700 | 6485.05843  | 455.75517     | -1.11378    | 0.01487    | 521.43653  | 0.38250        |
| 51  | 4631.78811 | 7.84924  | 18259.38838 | 96.10551      | -4.90481    | 0.00005    | 98.41642   | 0.36332        |
| 52  | 2496.01483 | 14.76789 | 4067.42358  | 406.75240     | 5.34966     | 0.33760    | 390.20947  | 0.53611        |
| 53  | 4763.06223 | 14.80908 | 11467.01749 | 432.74641     | 3.90698     | 0.02431    | 629.57781  | 0.35577        |
| 54  | 5119.83151 | 10.92640 | 10007.48752 | 66.91673      | -3.15524    | 0.00067    | 52.39515   | 0.72715        |
| 55  | 4705.42114 | 19.15174 | 9749.86479  | 431.25119     | -0.17284    | 0.04401    | 547.64164  | 0.30572        |
| 56  | 5093.51508 | 13.19370 | 12512.20828 | 73.51966      | -2.22821    | 0.00100    | 61.55753   | 0.41019        |
| 57  | 3217.94491 | 14.56054 | 10005.23668 | 432.45510     | 3.19881     | 0.08487    | 462.48338  | 0.43966        |
| 58  | 4876.30469 | 16.85070 | 8585.91763  | 533.68725     | 2.27398     | 0.05639    | 712.13146  | 0.40458        |
| 59  | 3572.18295 | 17.66564 | 7374.35008  | 497.46869     | 0.59456     | 0.09411    | 487.87023  | 0.78476        |
| 60  | 4146.91891 | 16.37918 | 9013.71164  | 711.63597     | -0.19855    | 0.01772    | 785.75542  | 0.41913        |
| 61  | 4340.26455 | 21.90733 | 8702.82731  | 774.88148     | 2.85509     | 0.04352    | 777.23197  | 0.54626        |
| 62  | 3383.37631 | 24.43785 | 11958.11460 | 581.72966     | 2.74947     | 0.04952    | 500.44999  | 0.65109        |
| 63  | 4766.29194 | 14.79944 | 9575.37641  | 388.72270     | 4.59679     | 0.02756    | 565.76276  | 0.34042        |
| 64  | 4572.74206 | 7.59560  | 8659.09378  | 297.24144     | -1.54067    | 0.00430    | 419.68328  | 0.07145        |
| 65  | 4572.04667 | 18.01295 | 8206.40028  | 504.25146     | 2.77890     | 0.03076    | 661.96192  | 0.24001        |

|     |            |          |             |           |          |         |           |         |
|-----|------------|----------|-------------|-----------|----------|---------|-----------|---------|
| 66  | 4465.33953 | 11.99740 | 16290.16489 | 92.55052  | -2.99424 | 0.00028 | 87.82467  | 1.13861 |
| 67  | 4511.76598 | 21.15357 | 10003.33011 | 522.99115 | 5.17913  | 0.10394 | 639.67569 | 0.51623 |
| 68  | 4198.44154 | 21.03738 | 10545.13681 | 739.62516 | 2.69903  | 0.03273 | 775.90685 | 0.52148 |
| 69  | 4780.53720 | 10.44010 | 11763.89315 | 542.76206 | -1.36267 | 0.00835 | 741.82528 | 0.10876 |
| 70  | 5003.57321 | 7.80377  | 13085.32744 | 196.50875 | 1.99661  | 0.00230 | 288.83322 | 0.06015 |
| 71  | 3734.68468 | 25.74610 | 7252.88314  | 83.63831  | 4.45243  | 0.00576 | 31.87992  | 1.33830 |
| 72  | 4254.42146 | 23.27263 | 13469.76886 | 639.74801 | 3.84719  | 0.00931 | 769.00756 | 0.13477 |
| 73  | 4748.03191 | 14.79096 | 9633.70762  | 360.96910 | 3.02101  | 0.05646 | 496.38078 | 0.58472 |
| 74  | 4967.90599 | 10.95393 | 10258.79893 | 92.77317  | 2.56083  | 0.00328 | 77.70368  | 0.24962 |
| 75  | 4966.88784 | 9.86131  | 8828.39250  | 421.12480 | 0.49827  | 0.00710 | 601.06709 | 0.15703 |
| 76  | 4786.68816 | 22.26626 | 10689.04538 | 456.47220 | 3.94374  | 0.05075 | 573.86344 | 0.51523 |
| 77  | 4146.37156 | 16.46386 | 8934.85365  | 644.19429 | 1.54690  | 0.02422 | 713.18882 | 0.40763 |
| 78  | 3765.75544 | 24.15675 | 10864.49137 | 756.42277 | 3.24461  | 0.05255 | 670.65433 | 0.78486 |
| 79  | 4959.17088 | 6.67289  | 9718.30805  | 435.46817 | 0.48992  | 0.00872 | 617.01622 | 0.17021 |
| 80  | 4688.16548 | 18.39575 | 16696.64996 | 397.94119 | 3.50044  | 0.03016 | 545.07137 | 0.18046 |
| 81  | 4037.44232 | 9.20865  | 11378.59464 | 242.16327 | -0.31398 | 0.00898 | 321.20714 | 0.13276 |
| 82  | 4401.86095 | 6.54648  | 8144.62633  | 373.46970 | -2.49796 | 0.00257 | 500.99477 | 0.10926 |
| 83  | 4678.50496 | 20.15657 | 7822.64818  | 362.78485 | 5.45355  | 0.04721 | 502.17395 | 0.24689 |
| 84  | 3165.78198 | 15.79353 | 12079.18523 | 274.72097 | 3.27322  | 0.10547 | 163.84973 | 0.73815 |
| 85  | 3671.07133 | 14.08565 | 9976.94171  | 543.44014 | 1.18157  | 0.06699 | 573.96320 | 0.66264 |
| 86  | 3392.87083 | 11.71110 | 7598.88649  | 646.72270 | 1.74712  | 0.08655 | 602.86078 | 0.57709 |
| 87  | 4543.77636 | 20.94813 | 15735.52090 | 520.21179 | 2.63260  | 0.01151 | 624.20338 | 0.24881 |
| 88  | 4769.92824 | 8.15774  | 9890.50657  | 312.73325 | -3.73356 | 0.00269 | 455.92995 | 0.06817 |
| 89  | 4281.54207 | 14.17831 | 6879.08077  | 580.36154 | -1.50816 | 0.01968 | 669.50700 | 0.44057 |
| 90  | 4790.47460 | 10.24662 | 11221.01291 | 481.84642 | 0.30809  | 0.02619 | 615.53724 | 0.40531 |
| 91  | 4665.92566 | 18.80354 | 12288.40497 | 530.98019 | 5.31213  | 0.04098 | 654.69244 | 0.35129 |
| 92  | 3308.28730 | 14.67353 | 11507.09765 | 398.10094 | 2.43920  | 0.08016 | 386.64394 | 0.49179 |
| 93  | 4891.68718 | 12.74416 | 7296.51834  | 465.79121 | 3.44313  | 0.04009 | 622.00371 | 0.28087 |
| 94  | 4822.85684 | 20.85203 | 7814.59131  | 548.99906 | 2.11853  | 0.04565 | 701.22576 | 0.42777 |
| 95  | 3984.09729 | 16.77696 | 5618.91465  | 385.57864 | -2.51922 | 0.02608 | 427.42365 | 0.78349 |
| 96  | 4290.05509 | 17.67454 | 7533.29003  | 790.62528 | 3.25964  | 0.05017 | 802.02076 | 0.43190 |
| 97  | 4530.18662 | 22.73712 | 7983.18474  | 541.79965 | 3.83465  | 0.13557 | 635.61550 | 0.71488 |
| 98  | 3221.54163 | 14.56333 | 10095.99632 | 291.86286 | 3.50999  | 0.08618 | 236.01536 | 0.45285 |
| 99  | 4813.81414 | 20.77926 | 7724.65340  | 688.29559 | 3.39337  | 0.05172 | 855.45991 | 0.38271 |
| 100 | 4400.91661 | 6.54424  | 7997.85597  | 352.28006 | -3.09554 | 0.00285 | 461.43778 | 0.16739 |
| 101 | 3158.76354 | 20.03414 | 10455.18056 | 549.58574 | 4.59408  | 0.14320 | 408.55220 | 1.27886 |
| 102 | 4521.85112 | 20.86383 | 11800.81299 | 739.56660 | 4.04306  | 0.01622 | 881.48629 | 0.28929 |
| 103 | 4514.12431 | 19.82820 | 7359.92484  | 624.22094 | 2.36024  | 0.04970 | 758.30461 | 0.36715 |
| 104 | 4738.53054 | 21.71254 | 10161.53186 | 514.89583 | 3.93836  | 0.07325 | 640.69663 | 0.47473 |
| 105 | 2918.94433 | 16.77453 | 14678.04455 | 391.64259 | 4.05391  | 0.24244 | 303.52029 | 0.63278 |
| 106 | 3427.18496 | 8.09147  | 12858.94974 | 385.84899 | 2.25306  | 0.03786 | 377.44102 | 0.40595 |
| 107 | 3741.94119 | 11.74971 | 7154.14735  | 534.36733 | 1.89050  | 0.02569 | 475.45106 | 0.51490 |
| 108 | 4769.38433 | 8.14280  | 9538.26840  | 309.69680 | -1.82254 | 0.00278 | 447.44324 | 0.06371 |
| 109 | 4379.82124 | 18.88765 | 8601.50377  | 645.98974 | 1.14801  | 0.03828 | 726.24396 | 0.36256 |
| 110 | 4774.10947 | 10.19383 | 11618.08823 | 438.46413 | -1.94290 | 0.00761 | 588.32915 | 0.17749 |
| 111 | 4712.70396 | 15.85400 | 11386.97828 | 370.14994 | 5.06546  | 0.05608 | 470.68426 | 0.37695 |
| 112 | 4679.79446 | 24.51845 | 8689.99123  | 361.33187 | 4.55552  | 0.06086 | 385.43617 | 0.97708 |
| 113 | 3517.59684 | 9.38766  | 8274.29396  | 370.41858 | -0.02109 | 0.03268 | 283.30877 | 0.46491 |
| 114 | 5020.93161 | 13.81018 | 8430.20193  | 379.98746 | 1.81525  | 0.01560 | 562.04150 | 0.19907 |
| 115 | 3536.42705 | 19.31930 | 19709.54661 | 458.66548 | 0.06944  | 0.07011 | 440.55382 | 0.70340 |
| 116 | 4329.99845 | 15.95497 | 9235.86556  | 460.01850 | 5.96722  | 0.11438 | 616.98005 | 0.46145 |
| 117 | 4280.43654 | 14.18537 | 6852.49119  | 645.13921 | 0.19905  | 0.03223 | 761.85998 | 0.26508 |
| 118 | 3341.02281 | 24.27669 | 11631.38314 | 566.66947 | 4.30858  | 0.06403 | 467.83869 | 0.56090 |
| 119 | 4004.59602 | 9.82238  | 9365.43820  | 274.14032 | -2.73653 | 0.00753 | 334.18984 | 0.21692 |
| 120 | 4397.55743 | 6.49020  | 7819.76103  | 472.87590 | -1.38674 | 0.00411 | 647.13827 | 0.04918 |
| 121 | 5073.88451 | 13.12981 | 12425.25012 | 118.28662 | -2.54388 | 0.00115 | 152.04813 | 0.39697 |
| 122 | 4832.20669 | 14.41317 | 10762.16363 | 417.80952 | 4.17966  | 0.03411 | 620.15532 | 0.19609 |
| 123 | 4367.57546 | 18.80371 | 9615.06369  | 652.93165 | 3.13412  | 0.04329 | 751.42663 | 0.35336 |
| 124 | 4423.36105 | 11.47278 | 8399.61018  | 668.29961 | 0.19220  | 0.01495 | 792.34032 | 0.17241 |
| 125 | 3515.91183 | 9.35763  | 8280.20807  | 412.88525 | -0.51270 | 0.02819 | 338.01988 | 0.46710 |
| 126 | 5112.92016 | 10.96345 | 14657.84353 | 127.90302 | -0.25075 | 0.00272 | 166.22878 | 0.11007 |
| 127 | 4779.30025 | 10.39362 | 11752.62881 | 542.42077 | -1.19225 | 0.00848 | 727.05616 | 0.11343 |
| 128 | 4978.87403 | 17.57607 | 8083.95214  | 552.47378 | 1.34577  | 0.02116 | 736.88042 | 0.33622 |
| 129 | 5112.47169 | 10.95305 | 14086.29029 | 182.78688 | 0.30032  | 0.00252 | 262.89672 | 0.16321 |
| 130 | 3995.18244 | 22.89715 | 7947.72512  | 766.70409 | 2.44570  | 0.03448 | 792.30224 | 0.54111 |
| 131 | 3794.44231 | 12.81681 | 11615.95269 | 112.94946 | -2.32666 | 0.00462 | 87.43046  | 0.81503 |
| 132 | 4463.86254 | 19.61265 | 5661.92597  | 409.10866 | 3.10239  | 0.03146 | 456.57496 | 0.41210 |
| 133 | 3756.37383 | 12.39122 | 6492.29788  | 331.16821 | -2.15302 | 0.01569 | 360.18031 | 0.36229 |
| 134 | 4381.04982 | 18.86463 | 8605.48435  | 681.79719 | 2.27656  | 0.03982 | 741.49459 | 0.42359 |
| 135 | 4240.57810 | 24.69904 | 8294.98264  | 723.30397 | 1.40818  | 0.01805 | 834.32765 | 0.39200 |
| 136 | 4617.60411 | 21.71802 | 15575.60949 | 308.61912 | 4.07213  | 0.06086 | 313.12550 | 0.53484 |

|     |            |          |             |            |          |         |            |         |
|-----|------------|----------|-------------|------------|----------|---------|------------|---------|
| 137 | 4667.13766 | 16.61649 | 17964.59653 | 358.88542  | 4.97428  | 0.07483 | 506.54803  | 0.47994 |
| 138 | 4240.32048 | 24.67215 | 8283.98162  | 757.41690  | 1.18651  | 0.01873 | 794.56160  | 0.37663 |
| 139 | 4814.96654 | 20.81131 | 7744.10406  | 661.42530  | 2.15706  | 0.04963 | 826.92273  | 0.41292 |
| 140 | 4552.04829 | 17.90666 | 8131.11377  | 430.42360  | 3.80627  | 0.03191 | 558.41985  | 0.23573 |
| 141 | 2982.89147 | 20.65483 | 8600.98879  | 567.49552  | 4.65346  | 0.21468 | 440.93108  | 1.23964 |
| 142 | 4804.18162 | 16.92211 | 9955.20134  | 623.40528  | 0.15040  | 0.03111 | 826.52458  | 0.35157 |
| 143 | 3673.66865 | 14.11040 | 10021.65902 | 533.58206  | 1.55209  | 0.06460 | 547.77901  | 0.65689 |
| 144 | 3764.29920 | 25.42051 | 6887.17347  | 72.34720   | 4.31633  | 0.00658 | 27.91497   | 1.31097 |
| 145 | 3266.85874 | 18.43173 | 18562.06839 | 467.70453  | 2.55254  | 0.19434 | 398.12762  | 1.07443 |
| 146 | 3832.37008 | 15.78421 | 8631.17028  | 677.41842  | 1.99908  | 0.03533 | 693.64731  | 0.53440 |
| 147 | 4516.72050 | 20.88650 | 11717.37367 | 544.82140  | 4.43514  | 0.01562 | 625.68069  | 0.23706 |
| 148 | 4196.35230 | 23.83504 | 8455.87797  | 779.60676  | 2.24629  | 0.05246 | 849.57334  | 0.55302 |
| 149 | 4725.22864 | 19.36216 | 9896.12949  | 653.16867  | 0.61344  | 0.03686 | 856.01950  | 0.29387 |
| 150 | 4791.66386 | 15.76209 | 7302.29017  | 427.21877  | 3.76168  | 0.01529 | 628.27059  | 0.21962 |
| 151 | 5025.35680 | 18.29030 | 10072.49290 | 472.59936  | 1.78154  | 0.01759 | 679.05728  | 0.25015 |
| 152 | 3736.28613 | 11.53759 | 8785.01006  | 544.71611  | 0.77320  | 0.03192 | 518.09436  | 0.60522 |
| 153 | 2532.25828 | 26.33955 | 11126.41662 | 462.83142  | 8.42406  | 0.18398 | 182.75097  | 1.45423 |
| 154 | 3345.95697 | 24.29642 | 11666.58607 | 486.38905  | 3.68000  | 0.06225 | 401.42888  | 0.48806 |
| 155 | 3502.94134 | 9.31943  | 7972.22985  | 386.23728  | 1.02220  | 0.03721 | 314.80698  | 0.48271 |
| 156 | 4821.26202 | 20.94416 | 7796.49915  | 536.88044  | 3.73928  | 0.04235 | 660.67577  | 0.41278 |
| 157 | 2449.07160 | 13.75136 | 3921.97176  | 434.08834  | 5.87202  | 0.26880 | 498.64671  | 0.68063 |
| 158 | 3867.95488 | 24.39019 | 6309.52359  | 1181.41757 | 5.39337  | 0.01717 | 1116.89507 | 0.69567 |
| 159 | 4053.09618 | 9.44486  | 11831.52650 | 173.80304  | -2.11065 | 0.00322 | 190.28425  | 0.20756 |
| 160 | 4979.57821 | 6.98153  | 8900.22734  | 312.48717  | -4.80894 | 0.00023 | 454.05518  | 0.03384 |
| 161 | 3476.66284 | 13.92420 | 7317.65599  | 585.80610  | 1.58468  | 0.06247 | 553.32938  | 0.57297 |
| 162 | 2960.20789 | 25.01464 | 7141.09490  | 662.08150  | 6.25526  | 0.17302 | 422.69375  | 0.76466 |
| 163 | 4547.81466 | 20.96497 | 12097.41985 | 717.23333  | 3.41307  | 0.01157 | 862.68004  | 0.24475 |
| 164 | 4847.28130 | 13.30690 | 11072.01747 | 334.91474  | 2.18854  | 0.02177 | 499.44122  | 0.29326 |
| 165 | 4708.32189 | 15.77014 | 11398.16162 | 410.54735  | 5.37075  | 0.05592 | 534.83393  | 0.39873 |
| 166 | 4574.93001 | 7.67807  | 8854.45205  | 349.06730  | -2.73683 | 0.00387 | 493.41280  | 0.08366 |
| 167 | 4573.59215 | 7.63590  | 8693.97038  | 330.55281  | -2.25191 | 0.00368 | 445.43650  | 0.07962 |
| 168 | 3378.70002 | 9.60394  | 6911.53439  | 451.73509  | 2.78460  | 0.06861 | 423.91419  | 0.53486 |
| 169 | 4671.09153 | 20.17963 | 9987.77247  | 371.15154  | 4.29100  | 0.04419 | 515.95185  | 0.30026 |
| 170 | 4708.54533 | 15.77251 | 11411.14858 | 349.29532  | 4.57007  | 0.04919 | 444.40426  | 0.38407 |
| 171 | 3753.82317 | 12.28252 | 6499.65555  | 318.64686  | -2.06506 | 0.01464 | 325.04692  | 0.39283 |
| 172 | 4387.06451 | 22.62190 | 8486.24556  | 615.92513  | 5.33241  | 0.01934 | 821.84858  | 0.27517 |
| 173 | 4490.18658 | 21.04576 | 9247.10802  | 521.96437  | 3.20052  | 0.04386 | 651.73693  | 0.38525 |
| 174 | 4768.50570 | 21.59497 | 19747.07382 | 620.10056  | 3.81446  | 0.03654 | 789.65428  | 0.26698 |
| 175 | 4737.94619 | 15.91636 | 12172.28438 | 487.97514  | 4.17478  | 0.04923 | 677.92715  | 0.42751 |
| 176 | 3503.35052 | 15.34403 | 11521.22014 | 447.75834  | 2.43773  | 0.10623 | 352.13025  | 0.51465 |
| 177 | 4701.17262 | 15.45190 | 14257.15175 | 383.87541  | 5.62106  | 0.06826 | 532.56259  | 0.27042 |
| 178 | 3170.13302 | 15.82881 | 12127.17283 | 457.23852  | 4.15675  | 0.11752 | 401.90999  | 0.58716 |
| 179 | 3226.66343 | 14.56332 | 10167.05622 | 403.69408  | 3.66876  | 0.09528 | 383.55361  | 0.47075 |
| 180 | 4352.56166 | 23.78980 | 10466.78242 | 959.82552  | 3.99398  | 0.03844 | 975.56848  | 0.54968 |
| 181 | 4968.91225 | 6.94982  | 14222.50458 | 115.93802  | -1.20987 | 0.00148 | 136.92244  | 0.15263 |
| 182 | 3189.71623 | 16.71477 | 7020.63114  | 301.43581  | 2.19602  | 0.09506 | 207.50612  | 0.63399 |
| 183 | 3703.55731 | 7.84260  | 6096.06863  | 389.62503  | -1.10061 | 0.02369 | 398.35492  | 0.42521 |
| 184 | 4287.37018 | 17.67127 | 14002.65154 | 72.94627   | 0.85587  | 0.00878 | 33.03246   | 1.21163 |
| 185 | 4691.04951 | 13.51584 | 9652.49162  | 406.58707  | 2.94345  | 0.02074 | 493.69776  | 0.24237 |
| 186 | 3742.23132 | 11.74546 | 7568.91739  | 733.43021  | 2.12284  | 0.02281 | 736.79821  | 0.55804 |
| 187 | 3492.89786 | 18.90423 | 18659.68151 | 391.21535  | 0.44561  | 0.04932 | 323.74020  | 1.76519 |
| 188 | 3502.82214 | 9.32358  | 7982.69894  | 520.01817  | 0.20362  | 0.03526 | 495.19288  | 0.48292 |
| 189 | 4429.47211 | 14.88172 | 23140.67522 | 75.23077   | -3.31182 | 0.00038 | 42.60017   | 0.85910 |
| 190 | 4707.94218 | 11.18363 | 15933.57610 | 152.69311  | 1.77777  | 0.00779 | 195.47152  | 0.23151 |
| 191 | 3703.30225 | 7.83572  | 6092.49250  | 353.31365  | -1.97298 | 0.02128 | 350.71257  | 0.50491 |
| 192 | 4958.32245 | 6.65705  | 9988.94468  | 236.67999  | -2.30498 | 0.00802 | 317.36384  | 0.18474 |
| 193 | 4463.34075 | 20.99679 | 9403.80432  | 530.25337  | 1.24193  | 0.04429 | 687.65659  | 0.37318 |
| 194 | 3908.39022 | 13.82716 | 17523.28043 | 163.25856  | -1.52579 | 0.00451 | 170.61056  | 0.59412 |
| 195 | 3502.37077 | 15.32759 | 11554.50014 | 335.63745  | 1.57632  | 0.09210 | 237.17919  | 0.41812 |
| 196 | 4640.86389 | 20.12099 | 9533.08013  | 298.75478  | 3.54518  | 0.04515 | 398.23698  | 0.33602 |
| 197 | 3504.82636 | 9.33625  | 8003.22629  | 453.97281  | 0.43720  | 0.03467 | 406.14726  | 0.47908 |
| 198 | 4958.15148 | 6.63957  | 10869.47904 | 348.74224  | -3.42133 | 0.00612 | 493.26123  | 0.17387 |
| 199 | 3136.10587 | 19.85520 | 10527.54256 | 538.17622  | 3.46537  | 0.13396 | 383.54566  | 1.27904 |
| 200 | 4968.15078 | 9.87375  | 8845.21018  | 430.72774  | 0.53190  | 0.00757 | 611.27238  | 0.17155 |
| 201 | 4572.98627 | 10.32484 | 9286.41376  | 532.55232  | -0.35669 | 0.03536 | 668.07151  | 0.28811 |
| 202 | 2487.60714 | 15.39260 | 3154.36119  | 431.10404  | 5.56260  | 0.33642 | 520.22021  | 1.03991 |
| 203 | 4035.48452 | 9.21926  | 11379.37662 | 272.73342  | -1.03364 | 0.00921 | 378.09697  | 0.08604 |
| 204 | 4233.10717 | 18.87847 | 6827.61577  | 664.32927  | 3.41611  | 0.04556 | 690.78304  | 0.54422 |
| 205 | 2909.69881 | 16.54395 | 14893.46183 | 312.48079  | 4.71728  | 0.20491 | 258.92656  | 0.74732 |
| 206 | 4281.50231 | 14.23818 | 6822.81328  | 457.62733  | -0.94647 | 0.02469 | 481.12094  | 0.43148 |
| 207 | 3181.74356 | 24.97409 | 7741.59488  | 447.11284  | 4.34271  | 0.11985 | 218.75252  | 1.25357 |

|     |            |          |             |            |          |         |            |         |
|-----|------------|----------|-------------|------------|----------|---------|------------|---------|
| 208 | 3740.30666 | 11.70592 | 7551.90585  | 760.26839  | 2.43670  | 0.02649 | 699.86153  | 0.51979 |
| 209 | 4527.95195 | 20.08971 | 24792.23080 | 504.14448  | 5.14178  | 0.11562 | 649.98183  | 0.31929 |
| 210 | 3379.08124 | 9.61675  | 6931.97957  | 450.97740  | 1.90387  | 0.05871 | 483.57156  | 0.54226 |
| 211 | 3490.89511 | 18.88220 | 18675.31819 | 471.35538  | 0.09522  | 0.04923 | 435.41941  | 1.74564 |
| 212 | 4410.19898 | 17.86098 | 7009.55978  | 709.53333  | 2.33010  | 0.04128 | 746.03163  | 0.41825 |
| 213 | 3553.45425 | 17.53951 | 7375.46699  | 500.33318  | 1.75798  | 0.11921 | 491.12207  | 0.80801 |
| 214 | 5009.03575 | 10.08917 | 9282.25818  | 286.06727  | 1.51527  | 0.00548 | 428.24308  | 0.12055 |
| 215 | 4808.87397 | 22.35969 | 10472.50082 | 759.21505  | 2.17095  | 0.01572 | 992.25552  | 0.24844 |
| 216 | 3775.41784 | 12.08735 | 9413.48271  | 578.32488  | 0.24261  | 0.02987 | 576.18466  | 0.49549 |
| 217 | 4195.93799 | 23.77238 | 8446.92886  | 811.78749  | 2.56844  | 0.05051 | 875.30201  | 0.58484 |
| 218 | 4542.99895 | 15.96125 | 11294.49959 | 414.48244  | 5.12302  | 0.07440 | 589.50222  | 0.35224 |
| 219 | 4928.29696 | 7.63807  | 8966.28419  | 324.58779  | -0.79668 | 0.00064 | 486.86858  | 0.03108 |
| 220 | 3149.92737 | 24.96231 | 7946.31569  | 635.07164  | 4.27972  | 0.11120 | 433.15072  | 1.18608 |
| 221 | 4533.43262 | 10.83530 | 17125.37730 | 81.01828   | -2.65801 | 0.00006 | 70.18648   | 1.19805 |
| 222 | 4885.69758 | 9.31778  | 12568.65181 | 377.61770  | 0.73791  | 0.01664 | 556.52687  | 0.27509 |
| 223 | 4575.07982 | 7.68226  | 8867.17683  | 310.55396  | -1.63064 | 0.00373 | 444.37818  | 0.08417 |
| 224 | 4249.21249 | 16.23203 | 14342.83555 | 87.16786   | 1.11228  | 0.01234 | 60.37254   | 1.55771 |
| 225 | 5018.85976 | 13.77210 | 8454.58275  | 451.78582  | 1.16619  | 0.01574 | 666.47636  | 0.18597 |
| 226 | 4003.66069 | 9.94146  | 9360.68297  | 351.85871  | -1.01428 | 0.01247 | 426.39121  | 0.18544 |
| 227 | 3175.29142 | 15.84610 | 12197.92946 | 441.05114  | 3.99633  | 0.11979 | 392.48318  | 0.64648 |
| 228 | 3693.87181 | 25.05438 | 7512.52621  | 57.25005   | 3.03484  | 0.00572 | 14.84061   | 2.06581 |
| 229 | 4944.98443 | 13.13936 | 9378.82187  | 338.16787  | 2.67447  | 0.00998 | 514.19558  | 0.20652 |
| 230 | 3132.06833 | 15.55078 | 6691.74840  | 304.25732  | 1.96432  | 0.01462 | 253.69371  | 0.19015 |
| 231 | 4630.36885 | 22.27181 | 9841.78831  | 519.96740  | 2.04485  | 0.03750 | 659.39319  | 0.39696 |
| 232 | 4634.09194 | 22.31023 | 9548.59147  | 647.66255  | 3.69082  | 0.04230 | 805.32647  | 0.41100 |
| 233 | 4846.61226 | 12.74733 | 13285.93591 | 411.51200  | 3.31556  | 0.02558 | 580.65678  | 0.22340 |
| 234 | 4675.00284 | 18.89011 | 12412.23491 | 491.05246  | 5.46849  | 0.03986 | 615.31309  | 0.37913 |
| 235 | 4779.76261 | 10.41440 | 11705.83869 | 419.14191  | 0.24273  | 0.01282 | 558.92133  | 0.18268 |
| 236 | 3540.09318 | 17.38805 | 7984.32142  | 408.72916  | 0.00472  | 0.06067 | 426.43057  | 0.51959 |
| 237 | 4918.81224 | 10.83208 | 8784.41098  | 146.98778  | 2.83908  | 0.00669 | 187.15566  | 0.08946 |
| 238 | 3103.75808 | 17.38579 | 16823.58851 | 395.59532  | 3.42546  | 0.19889 | 289.54461  | 0.97235 |
| 239 | 4515.40451 | 20.93353 | 15075.61704 | 713.20587  | 3.55980  | 0.01342 | 874.16031  | 0.23014 |
| 240 | 3395.41697 | 11.74046 | 7595.56777  | 503.98480  | 1.97641  | 0.08524 | 416.75956  | 0.57559 |
| 241 | 4376.66924 | 18.81484 | 8567.30691  | 659.78708  | 3.08984  | 0.04522 | 700.49545  | 0.39048 |
| 242 | 4423.14382 | 11.47509 | 8385.02738  | 652.41054  | 0.17831  | 0.01451 | 772.41610  | 0.16639 |
| 243 | 4748.46402 | 14.79539 | 9625.48323  | 492.36247  | 3.66171  | 0.06202 | 683.95015  | 0.59735 |
| 244 | 4875.79602 | 7.73431  | 9578.01881  | 404.89343  | 4.91773  | 0.01252 | 567.45067  | 0.20623 |
| 245 | 4187.81355 | 23.78789 | 8398.05155  | 749.17871  | 2.66968  | 0.05410 | 801.10799  | 0.51133 |
| 246 | 4967.50695 | 9.96800  | 8793.03502  | 220.50095  | 1.44958  | 0.00417 | 316.24183  | 0.18404 |
| 247 | 4548.69336 | 16.03233 | 11285.34523 | 425.66251  | 4.92851  | 0.07571 | 609.64988  | 0.38314 |
| 248 | 3577.07105 | 13.33194 | 5206.25214  | 581.80657  | 1.84036  | 0.03970 | 566.34761  | 0.54894 |
| 249 | 4550.17745 | 16.04678 | 11304.72335 | 474.59495  | 4.25896  | 0.07468 | 670.01000  | 0.38357 |
| 250 | 4537.25161 | 20.26768 | 20354.01129 | 527.85734  | 4.14750  | 0.11124 | 696.64477  | 0.44580 |
| 251 | 4496.70697 | 12.62445 | 9335.33935  | 504.25451  | -0.61650 | 0.02372 | 571.08750  | 0.29368 |
| 252 | 4429.36085 | 20.16194 | 8117.68321  | 387.67157  | 5.85079  | 0.12646 | 387.02169  | 0.50765 |
| 253 | 4228.42487 | 18.84933 | 6815.12958  | 729.68847  | 2.87375  | 0.05406 | 766.41455  | 0.55725 |
| 254 | 4737.72624 | 15.91663 | 12182.27726 | 355.95779  | 3.53642  | 0.04645 | 488.41787  | 0.43137 |
| 255 | 3832.87375 | 23.93518 | 7090.42428  | 522.52954  | 6.46389  | 0.07512 | 516.90150  | 0.44248 |
| 256 | 4727.72691 | 21.60185 | 10074.23935 | 536.19388  | 3.59652  | 0.07078 | 698.83795  | 0.45824 |
| 257 | 4138.09626 | 12.94261 | 12637.84518 | 241.27434  | -0.82842 | 0.00624 | 313.34819  | 0.13799 |
| 258 | 3127.09448 | 16.67539 | 9401.53122  | 558.81860  | 4.04892  | 0.23283 | 483.14482  | 0.64012 |
| 259 | 4399.37422 | 6.56532  | 7957.27086  | 346.74130  | -1.83246 | 0.00315 | 447.96465  | 0.06603 |
| 260 | 4883.58244 | 19.79891 | 11111.37714 | 437.53453  | 3.27640  | 0.06628 | 606.18785  | 0.36667 |
| 261 | 5044.83270 | 13.48098 | 8945.33568  | 319.42239  | 1.55831  | 0.01328 | 469.51377  | 0.20875 |
| 262 | 4571.31379 | 22.49068 | 12893.76084 | 484.03683  | 4.62714  | 0.03387 | 601.34219  | 0.35272 |
| 263 | 4640.26286 | 22.36167 | 9572.07138  | 646.48759  | 2.68329  | 0.04153 | 824.45512  | 0.43667 |
| 264 | 4688.99635 | 18.27464 | 16677.87371 | 447.32976  | 4.41519  | 0.02841 | 603.47475  | 0.18254 |
| 265 | 4772.32316 | 18.47812 | 10688.48512 | 564.06076  | 1.30371  | 0.03367 | 733.48550  | 0.36833 |
| 266 | 2492.89583 | 14.46356 | 3664.67363  | 532.34708  | 5.62266  | 0.32727 | 523.58608  | 0.26154 |
| 267 | 3238.21670 | 19.74970 | 13380.57846 | 403.09927  | 1.87758  | 0.17583 | 327.51464  | 0.90660 |
| 268 | 2897.17458 | 15.76703 | 15537.03274 | 338.24796  | 4.51034  | 0.22979 | 258.74833  | 0.83727 |
| 269 | 4327.44694 | 15.91910 | 9201.49670  | 222.54191  | 5.99525  | 0.11512 | 251.82416  | 0.46036 |
| 270 | 4341.52180 | 18.33702 | 6913.47850  | 538.89422  | 4.69145  | 0.03766 | 554.19024  | 0.45479 |
| 271 | 3429.19189 | 8.09029  | 13631.65909 | 355.06390  | 2.03001  | 0.02905 | 340.98334  | 0.42731 |
| 272 | 3504.59824 | 15.32811 | 11528.23023 | 484.40832  | 1.43391  | 0.08883 | 419.34871  | 0.51326 |
| 273 | 3515.73339 | 9.35084  | 8273.06386  | 435.19177  | -0.85062 | 0.02923 | 374.87939  | 0.45596 |
| 274 | 4345.02105 | 23.77899 | 10428.35275 | 854.25317  | 3.20117  | 0.02870 | 870.51110  | 0.55943 |
| 275 | 4774.11143 | 10.19365 | 11718.88558 | 539.52989  | -2.21294 | 0.00743 | 725.88801  | 0.19366 |
| 276 | 3901.88482 | 24.71768 | 10039.05331 | 1142.26080 | 6.67507  | 0.01435 | 1093.23059 | 0.33809 |
| 277 | 4082.35785 | 20.31514 | 14865.58707 | 84.92627   | 2.56699  | 0.01086 | 52.02191   | 0.54566 |
| 278 | 3118.97478 | 15.95149 | 6831.29904  | 300.64906  | 0.23156  | 0.01150 | 252.52515  | 0.29874 |



|     |            |          |             |            |          |         |            |         |
|-----|------------|----------|-------------|------------|----------|---------|------------|---------|
| 279 | 3570.71021 | 17.60237 | 7370.31829  | 389.75290  | -0.41136 | 0.09600 | 361.33210  | 0.82977 |
| 280 | 4628.87340 | 22.28046 | 9853.62727  | 638.42660  | 2.34019  | 0.03816 | 805.09771  | 0.41131 |
| 281 | 3869.46630 | 19.92713 | 13182.46021 | 118.21906  | 3.36480  | 0.01685 | 98.72835   | 1.27634 |
| 282 | 4279.86146 | 14.16975 | 6856.20496  | 653.21829  | 1.08883  | 0.03316 | 752.59229  | 0.37234 |
| 283 | 2482.06454 | 14.30061 | 3649.64978  | 537.99949  | 5.50889  | 0.34385 | 609.35707  | 0.90150 |
| 284 | 4575.13612 | 10.34812 | 9302.22380  | 463.55308  | -1.01462 | 0.02600 | 605.69301  | 0.17016 |
| 285 | 3160.53003 | 15.78880 | 11984.54839 | 399.19717  | 3.63415  | 0.11434 | 343.61857  | 0.63929 |
| 286 | 4558.75560 | 20.52791 | 17117.26120 | 459.14941  | 6.72497  | 0.09808 | 581.54542  | 0.39878 |
| 287 | 4425.99291 | 17.38379 | 10699.26260 | 628.79862  | 2.91251  | 0.02956 | 678.69139  | 0.40963 |
| 288 | 4797.89260 | 16.83108 | 9905.61549  | 645.70129  | 0.67881  | 0.03642 | 823.96608  | 0.40879 |
| 289 | 4432.04974 | 14.64606 | 6180.61143  | 699.09743  | 3.27156  | 0.02865 | 759.74445  | 0.29506 |
| 290 | 4729.32560 | 19.36586 | 9906.80223  | 642.53453  | 0.61221  | 0.03488 | 834.38467  | 0.26076 |
| 291 | 3969.82112 | 13.89657 | 17013.21089 | 135.68934  | -1.02610 | 0.00272 | 140.20863  | 0.52751 |
| 292 | 3430.89497 | 8.09469  | 13600.27382 | 353.93087  | 1.32783  | 0.03289 | 358.60741  | 0.45106 |
| 293 | 3773.35620 | 12.03531 | 9410.68056  | 677.62631  | 1.19561  | 0.03257 | 673.51587  | 0.54740 |
| 294 | 3133.66231 | 14.09739 | 8590.75187  | 587.17719  | 4.29169  | 0.31705 | 519.82929  | 0.81371 |
| 295 | 4919.81752 | 19.94647 | 11484.46693 | 580.45223  | 3.14268  | 0.05720 | 783.19217  | 0.40576 |
| 296 | 3381.31046 | 9.65060  | 6948.21394  | 472.95430  | 2.22466  | 0.05626 | 493.38193  | 0.56294 |
| 297 | 4242.62264 | 19.12197 | 7242.24130  | 569.55638  | 3.43509  | 0.04962 | 616.56614  | 0.50229 |
| 298 | 4814.17524 | 22.38198 | 11639.95116 | 737.41116  | 2.40232  | 0.01580 | 980.69834  | 0.24908 |
| 299 | 4617.28994 | 21.71499 | 15584.82789 | 447.83877  | 4.88254  | 0.06004 | 522.34627  | 0.53704 |
| 300 | 4147.24176 | 16.40930 | 8932.34031  | 742.60570  | 1.36029  | 0.02632 | 819.35410  | 0.46112 |
| 301 | 3223.27654 | 14.53751 | 10121.77639 | 499.64489  | 3.30063  | 0.09596 | 517.28270  | 0.46228 |
| 302 | 3736.14899 | 11.50917 | 8793.49295  | 478.69866  | -0.23346 | 0.03213 | 449.81312  | 0.61362 |
| 303 | 5112.55294 | 10.95840 | 14650.41211 | 169.32257  | 0.24251  | 0.00262 | 238.47693  | 0.11946 |
| 304 | 4719.09221 | 19.28536 | 9892.75271  | 625.20124  | 1.12983  | 0.04065 | 797.64484  | 0.28774 |
| 305 | 4692.05209 | 15.37797 | 14167.34628 | 312.88823  | 4.16071  | 0.06516 | 438.13265  | 0.34688 |
| 306 | 4574.17633 | 10.45067 | 9309.03816  | 386.54922  | -2.81537 | 0.02025 | 490.36166  | 0.21721 |
| 307 | 2542.57415 | 14.95855 | 3457.58319  | 428.15874  | 4.84039  | 0.25101 | 443.41733  | 2.06935 |
| 308 | 3786.04572 | 19.91702 | 9519.80428  | 467.66467  | -1.01789 | 0.03358 | 437.71491  | 1.33321 |
| 309 | 3371.50036 | 7.48854  | 13564.11412 | 329.45176  | 0.63919  | 0.03173 | 283.18216  | 0.49899 |
| 310 | 4769.03486 | 18.42271 | 10673.79157 | 647.16731  | 0.84226  | 0.03420 | 844.08063  | 0.37725 |
| 311 | 3387.64806 | 9.53670  | 6802.74332  | 395.60273  | 0.91556  | 0.04837 | 354.99468  | 0.60890 |
| 312 | 4664.77591 | 19.54769 | 12889.36032 | 361.66201  | 4.59122  | 0.09130 | 472.38447  | 0.46409 |
| 313 | 4417.17134 | 17.82563 | 7200.19094  | 550.56366  | 1.21542  | 0.03148 | 650.23138  | 0.32533 |
| 314 | 4752.62973 | 14.63297 | 9512.52105  | 259.87565  | 3.39459  | 0.02701 | 361.14693  | 0.34151 |
| 315 | 4263.00275 | 23.20440 | 13439.31127 | 782.17856  | 4.79704  | 0.00964 | 952.09778  | 0.12498 |
| 316 | 4281.55474 | 14.25040 | 6814.77214  | 456.00275  | -1.75393 | 0.02126 | 510.77610  | 0.44219 |
| 317 | 3128.54875 | 15.58337 | 6663.64280  | 343.66949  | 2.08462  | 0.01584 | 291.82123  | 0.25125 |
| 318 | 4691.14398 | 13.75373 | 9725.83307  | 382.37405  | 2.64573  | 0.02070 | 460.32896  | 0.23961 |
| 319 | 4252.54101 | 18.99922 | 7165.25977  | 765.01830  | 3.81865  | 0.05575 | 798.58541  | 0.39853 |
| 320 | 3741.91493 | 11.74745 | 7152.50950  | 731.14448  | 1.92335  | 0.02780 | 711.24826  | 0.51623 |
| 321 | 3310.21481 | 14.66043 | 11501.79255 | 395.99298  | 1.57850  | 0.05899 | 387.59800  | 0.57056 |
| 322 | 4844.79224 | 12.70214 | 13234.16047 | 411.13753  | 3.45460  | 0.02565 | 586.73071  | 0.22992 |
| 323 | 4002.24938 | 9.94623  | 9323.84743  | 347.74871  | -1.27215 | 0.01285 | 435.87552  | 0.22116 |
| 324 | 4755.56328 | 21.56924 | 20037.85915 | 492.93615  | 5.51172  | 0.03203 | 640.87249  | 0.35156 |
| 325 | 3853.44431 | 24.43696 | 6290.12613  | 773.98505  | 3.35971  | 0.01772 | 755.65370  | 0.84718 |
| 326 | 3576.20513 | 17.69609 | 7355.83874  | 437.02581  | -0.08891 | 0.09391 | 424.53552  | 0.82217 |
| 327 | 4831.57827 | 14.36500 | 11015.12594 | 348.59267  | 2.81960  | 0.02946 | 523.25157  | 0.21008 |
| 328 | 4879.83300 | 10.51177 | 7525.32684  | 52.98610   | 3.75058  | 0.00422 | 8.38412    | 0.61703 |
| 329 | 4765.66358 | 18.36513 | 10677.68933 | 711.41957  | 2.15705  | 0.04051 | 895.28780  | 0.32719 |
| 330 | 3395.84027 | 11.75449 | 7578.51893  | 583.88015  | 1.78461  | 0.08648 | 487.41976  | 0.68657 |
| 331 | 4683.93386 | 13.66964 | 9857.49805  | 428.58826  | 4.12600  | 0.02018 | 525.60855  | 0.23285 |
| 332 | 4899.51453 | 13.48042 | 8156.34554  | 386.21615  | 1.87921  | 0.01604 | 559.88382  | 0.23240 |
| 333 | 4505.92174 | 16.71458 | 8834.79379  | 492.74064  | 0.32375  | 0.03019 | 594.17577  | 0.34697 |
| 334 | 5024.69998 | 18.12417 | 10144.83044 | 294.76977  | 1.13673  | 0.01570 | 412.23892  | 0.25525 |
| 335 | 3582.04064 | 13.18356 | 5369.57414  | 559.69768  | 0.51198  | 0.04229 | 526.53170  | 0.57054 |
| 336 | 3665.12135 | 24.52284 | 13251.52514 | 85.92085   | 3.39344  | 0.00998 | 33.53836   | 1.16136 |
| 337 | 3146.50499 | 19.36744 | 8357.78324  | 485.21774  | 2.50257  | 0.15034 | 346.58430  | 1.89908 |
| 338 | 4420.71028 | 22.67493 | 8635.72221  | 530.92449  | 3.90762  | 0.01472 | 715.39727  | 0.28179 |
| 339 | 3173.19592 | 16.42293 | 9623.33404  | 466.65291  | 3.47317  | 0.24584 | 354.26727  | 0.71684 |
| 340 | 3136.23373 | 15.59267 | 6714.27840  | 337.89567  | 1.24449  | 0.01545 | 320.01860  | 0.18222 |
| 341 | 4520.33736 | 25.72263 | 8496.72712  | 43.37954   | 1.29102  | 0.00107 | 8.45790    | 1.36583 |
| 342 | 2598.79240 | 26.31838 | 11487.42250 | 571.74392  | 8.02768  | 0.18350 | 306.51444  | 1.43235 |
| 343 | 5115.72267 | 10.81383 | 14006.43015 | 80.63308   | 2.44958  | 0.00302 | 67.04134   | 0.12454 |
| 344 | 3331.88364 | 24.24946 | 11514.68061 | 675.77603  | 4.84046  | 0.06754 | 620.73835  | 0.75136 |
| 345 | 4233.15620 | 24.71748 | 8281.42876  | 552.16910  | 1.32236  | 0.01979 | 604.14846  | 0.36911 |
| 346 | 3906.44382 | 24.66762 | 10038.62900 | 1295.16277 | 7.41511  | 0.01436 | 1267.77069 | 0.35725 |
| 347 | 4550.59457 | 14.08001 | 21617.26222 | 78.47459   | -3.15846 | 0.00013 | 48.10326   | 0.62634 |
| 348 | 4845.34489 | 15.29070 | 9696.12338  | 375.98218  | 2.38327  | 0.02421 | 544.84271  | 0.29636 |
| 349 | 4484.90815 | 22.94557 | 7119.46352  | 477.45872  | 7.76191  | 0.15689 | 548.53617  | 0.66743 |

|     |            |          |             |            |          |         |           |         |
|-----|------------|----------|-------------|------------|----------|---------|-----------|---------|
| 350 | 4892.58667 | 9.50308  | 12753.87621 | 385.29696  | 3.62148  | 0.02186 | 575.39920 | 0.20888 |
| 351 | 3841.97358 | 20.23320 | 6333.66974  | 726.62464  | 1.91397  | 0.02365 | 670.72775 | 0.44724 |
| 352 | 4857.47199 | 13.78365 | 11582.98107 | 481.46865  | 5.80929  | 0.04571 | 627.88074 | 0.51655 |
| 353 | 4779.62171 | 10.39019 | 11649.99459 | 477.62455  | -0.54887 | 0.00902 | 623.12894 | 0.14012 |
| 354 | 4428.64289 | 15.57568 | 6468.80917  | 623.07719  | 2.32583  | 0.02383 | 688.34390 | 0.41850 |
| 355 | 4798.66576 | 16.83485 | 9913.75033  | 495.25181  | 1.17971  | 0.03379 | 632.35733 | 0.43973 |
| 356 | 3237.88800 | 25.05604 | 7580.09048  | 377.70179  | 4.14728  | 0.12190 | 172.94051 | 1.32666 |
| 357 | 2536.77428 | 16.45019 | 3438.65634  | 455.38161  | 5.08833  | 0.26745 | 511.25416 | 1.96662 |
| 358 | 4492.25051 | 20.51199 | 16032.78966 | 769.98883  | 2.85384  | 0.01287 | 920.05140 | 0.42369 |
| 359 | 3384.63891 | 24.44123 | 11976.01803 | 599.34133  | 2.31230  | 0.05757 | 514.01124 | 0.64968 |
| 360 | 3578.57550 | 23.20114 | 9378.79766  | 902.43108  | 8.89225  | 0.07344 | 668.56824 | 1.15901 |
| 361 | 4513.75064 | 19.85938 | 7327.50912  | 565.88824  | 1.70646  | 0.05170 | 710.83246 | 0.44722 |
| 362 | 4254.06467 | 18.97673 | 7159.44100  | 702.74424  | 2.28009  | 0.04210 | 771.66980 | 0.42945 |
| 363 | 4737.72092 | 15.91534 | 12184.83012 | 281.36834  | 3.38894  | 0.04566 | 368.00134 | 0.42918 |
| 364 | 3535.36084 | 15.22461 | 11904.76032 | 345.39835  | 0.81114  | 0.06952 | 257.54124 | 0.64651 |
| 365 | 3942.52210 | 20.04879 | 9132.46570  | 746.44040  | 5.56083  | 0.05297 | 656.61002 | 0.67688 |
| 366 | 4421.91098 | 22.69201 | 8540.57335  | 621.63057  | 3.53676  | 0.01338 | 818.19502 | 0.27994 |
| 367 | 2550.82192 | 14.84930 | 3719.46662  | 536.05568  | 5.25201  | 0.29746 | 596.02820 | 1.87622 |
| 368 | 2906.83174 | 16.53765 | 14871.15778 | 362.69991  | 4.02977  | 0.19381 | 334.17444 | 0.72689 |
| 369 | 3851.47658 | 24.43386 | 6301.43476  | 913.36653  | 4.02837  | 0.01740 | 898.67092 | 0.87400 |
| 370 | 4425.96939 | 11.53615 | 8416.13098  | 419.10757  | -1.86401 | 0.01087 | 509.29019 | 0.26211 |
| 371 | 4752.95897 | 8.28125  | 9986.07382  | 282.53619  | -4.29373 | 0.00300 | 386.38384 | 0.10919 |
| 372 | 4895.21815 | 12.79445 | 7484.41350  | 270.80795  | 4.00158  | 0.03941 | 345.44426 | 0.30065 |
| 373 | 3776.77981 | 9.57098  | 8271.00363  | 507.69817  | -1.40912 | 0.04569 | 500.30531 | 0.66643 |
| 374 | 4244.11384 | 24.67768 | 8301.80885  | 644.21526  | 1.85901  | 0.01834 | 713.75421 | 0.39839 |
| 375 | 3540.45884 | 9.42444  | 7451.16819  | 695.93828  | 2.23684  | 0.04013 | 625.82527 | 0.66347 |
| 376 | 4469.63889 | 20.40823 | 13668.18166 | 458.07442  | 5.23618  | 0.10342 | 540.09865 | 0.48569 |
| 377 | 5002.94748 | 7.78097  | 14812.44330 | 220.62095  | -1.93056 | 0.00181 | 332.91648 | 0.07772 |
| 378 | 4234.54346 | 24.71553 | 8288.96868  | 746.55387  | 1.27306  | 0.01784 | 845.15156 | 0.36851 |
| 379 | 4922.05181 | 10.94273 | 8944.54997  | 179.96587  | 0.94622  | 0.00538 | 245.87866 | 0.13352 |
| 380 | 4844.23983 | 12.61929 | 14451.82058 | 429.39065  | 2.52086  | 0.02263 | 619.46614 | 0.23201 |
| 381 | 4887.96516 | 9.39824  | 12709.07112 | 369.54729  | 1.83888  | 0.01937 | 556.03092 | 0.27138 |
| 382 | 4267.25519 | 16.20043 | 7789.75015  | 634.10329  | 1.14031  | 0.04430 | 691.11401 | 0.47085 |
| 383 | 3681.59501 | 7.67696  | 5920.79468  | 317.06682  | -1.01133 | 0.02769 | 307.41948 | 0.47241 |
| 384 | 4641.21970 | 7.71927  | 18136.56599 | 116.57437  | -4.39618 | 0.00006 | 138.61062 | 0.22933 |
| 385 | 3492.35033 | 18.88865 | 18667.01500 | 306.17785  | 0.27685  | 0.05001 | 197.33910 | 1.76673 |
| 386 | 4176.66197 | 18.97327 | 8246.87166  | 756.45188  | 2.22031  | 0.03449 | 789.12896 | 0.54171 |
| 387 | 4958.18112 | 6.64861  | 9992.88381  | 392.13873  | -1.47400 | 0.00693 | 567.94659 | 0.19087 |
| 388 | 4807.82129 | 22.30833 | 10467.64409 | 546.49897  | 3.63297  | 0.01624 | 717.07409 | 0.26597 |
| 389 | 4250.26298 | 11.31821 | 11069.49332 | 106.58975  | -2.27347 | 0.00043 | 110.55784 | 0.63159 |
| 390 | 4080.96441 | 21.81624 | 8936.49767  | 748.03163  | 2.38155  | 0.03000 | 796.29262 | 0.55178 |
| 391 | 4661.20694 | 16.54116 | 17819.40296 | 369.29008  | 4.36214  | 0.09132 | 502.29954 | 0.43295 |
| 392 | 4433.34341 | 15.59133 | 6459.48058  | 645.03867  | 2.97374  | 0.02176 | 718.65882 | 0.42875 |
| 393 | 4899.05126 | 16.86744 | 8800.57605  | 539.67914  | 3.41019  | 0.05274 | 709.29232 | 0.42506 |
| 394 | 3635.48670 | 12.67514 | 22231.79512 | 224.56684  | -0.03282 | 0.02324 | 220.60603 | 0.46117 |
| 395 | 4794.51643 | 10.38113 | 11107.99709 | 375.81259  | 1.16714  | 0.03693 | 457.77883 | 0.42496 |
| 396 | 4291.57080 | 18.09389 | 6914.12094  | 755.52441  | 2.76333  | 0.06027 | 801.74920 | 0.30807 |
| 397 | 2907.51162 | 16.22126 | 14863.91137 | 522.71118  | 4.48263  | 0.20340 | 467.84730 | 0.59815 |
| 398 | 4415.61084 | 17.86828 | 7176.04179  | 516.75911  | 1.64014  | 0.04974 | 592.91570 | 0.44720 |
| 399 | 4657.83614 | 19.52847 | 11871.22484 | 401.24333  | 4.54860  | 0.09861 | 532.14892 | 0.49379 |
| 400 | 4239.04859 | 19.24865 | 7230.85252  | 493.51321  | 3.60754  | 0.04709 | 519.04933 | 0.44303 |
| 401 | 4504.70297 | 16.55542 | 8921.86372  | 416.33146  | -1.72465 | 0.02938 | 474.28943 | 0.30488 |
| 402 | 3269.43185 | 18.13287 | 9873.01235  | 365.63118  | 1.85901  | 0.12594 | 273.00122 | 0.87258 |
| 403 | 4623.08628 | 7.71310  | 16720.23416 | 137.15779  | -3.28989 | 0.00002 | 184.53061 | 0.08017 |
| 404 | 4641.30620 | 20.76060 | 9182.06483  | 632.68087  | 2.84475  | 0.07707 | 785.14163 | 0.51580 |
| 405 | 5019.49314 | 13.75811 | 8483.95541  | 401.19882  | 1.50179  | 0.01586 | 591.68241 | 0.17333 |
| 406 | 3577.58541 | 23.22148 | 9378.80866  | 1011.98388 | 8.66894  | 0.07733 | 744.29716 | 1.15139 |
| 407 | 5002.83590 | 7.77780  | 14811.40720 | 161.60996  | -1.23083 | 0.00169 | 224.61784 | 0.07574 |
| 408 | 4792.75717 | 10.33267 | 11065.39938 | 625.02075  | 1.40512  | 0.03860 | 786.92746 | 0.42839 |
| 409 | 4556.22097 | 22.52837 | 12901.39344 | 523.12325  | 5.59165  | 0.02475 | 647.71671 | 0.40316 |
| 410 | 3773.23055 | 12.56513 | 13616.18101 | 157.50323  | -0.77570 | 0.00385 | 170.58758 | 0.28429 |
| 411 | 3705.13602 | 24.55433 | 6227.98285  | 505.96281  | 2.70418  | 0.03496 | 431.57662 | 0.49434 |
| 412 | 4890.42149 | 12.72083 | 7283.29680  | 308.63227  | 3.21963  | 0.03992 | 399.58857 | 0.27945 |
| 413 | 2892.13258 | 16.22764 | 14701.05506 | 286.49815  | 4.97724  | 0.20168 | 147.08911 | 0.63304 |
| 414 | 4969.69892 | 17.26308 | 8779.96757  | 718.03434  | 1.20635  | 0.01744 | 923.88646 | 0.28102 |
| 415 | 4486.38747 | 21.02182 | 9237.80527  | 403.41168  | 3.65004  | 0.04492 | 511.39276 | 0.38906 |
| 416 | 3522.13455 | 17.30439 | 7880.04186  | 411.35108  | 0.74058  | 0.06751 | 383.85740 | 0.68658 |
| 417 | 4145.36808 | 16.45311 | 8928.20979  | 651.76832  | 0.74875  | 0.02165 | 708.39087 | 0.37819 |
| 418 | 4374.25124 | 20.36647 | 9901.57848  | 403.46610  | 1.36555  | 0.03895 | 420.25521 | 0.43733 |
| 419 | 4514.42725 | 19.81307 | 7367.51093  | 398.81671  | 0.73009  | 0.04782 | 462.69822 | 0.46069 |
| 420 | 2792.55866 | 14.54120 | 13694.51412 | 376.92479  | 4.86044  | 0.25043 | 266.23245 | 0.64436 |

|     |            |          |             |           |          |         |           |         |
|-----|------------|----------|-------------|-----------|----------|---------|-----------|---------|
| 421 | 4631.37105 | 15.34391 | 8233.66308  | 450.07182 | 4.51305  | 0.10419 | 622.43386 | 0.46818 |
| 422 | 3601.76193 | 13.10851 | 24842.97145 | 344.03986 | 1.35284  | 0.01645 | 435.09721 | 0.29491 |
| 423 | 3849.29728 | 24.38366 | 6298.88921  | 791.14241 | 3.83157  | 0.01894 | 755.60381 | 0.77786 |
| 424 | 4821.01541 | 20.94727 | 7793.26560  | 551.25337 | 4.08903  | 0.04476 | 678.57403 | 0.40775 |
| 425 | 4518.13417 | 22.70635 | 7796.55451  | 461.85735 | 4.92777  | 0.13022 | 521.23464 | 0.74932 |
| 426 | 4432.29137 | 20.23482 | 8166.79328  | 599.07818 | 5.56330  | 0.11861 | 685.10701 | 0.53844 |
| 427 | 4199.72635 | 21.01086 | 10523.16466 | 826.79291 | 2.95457  | 0.04075 | 809.44314 | 0.52170 |
| 428 | 4923.56108 | 10.94374 | 8924.36217  | 122.50315 | 1.54302  | 0.00427 | 140.47826 | 0.15073 |
| 429 | 4617.91194 | 18.63943 | 8318.09743  | 435.96887 | 4.02236  | 0.03250 | 557.95294 | 0.36170 |
| 430 | 4982.40490 | 17.70515 | 8847.92070  | 633.33435 | 1.36352  | 0.02159 | 823.55575 | 0.32086 |
| 431 | 4397.13221 | 15.25984 | 24821.82625 | 100.62614 | -1.72569 | 0.00045 | 94.16131  | 0.31036 |
| 432 | 3337.93737 | 24.30370 | 11589.14921 | 645.01710 | 3.91641  | 0.06553 | 600.09883 | 0.48619 |
| 433 | 3679.24236 | 7.67087  | 5911.39651  | 385.33730 | -0.33799 | 0.02805 | 412.58716 | 0.51798 |
| 434 | 2525.14223 | 26.21157 | 10856.23165 | 562.67719 | 8.83613  | 0.18777 | 283.72561 | 1.36932 |
| 435 | 4399.19303 | 6.56083  | 7934.34914  | 350.17231 | -2.20728 | 0.00292 | 481.99840 | 0.09766 |
| 436 | 4767.79439 | 14.71219 | 12304.23832 | 369.77927 | 2.24441  | 0.02002 | 527.02989 | 0.37967 |
| 437 | 4461.28833 | 21.72709 | 8013.50940  | 545.52950 | 2.93858  | 0.02964 | 688.70899 | 0.30975 |
| 438 | 4515.89842 | 21.21178 | 10049.33502 | 476.58756 | 4.12186  | 0.08879 | 583.88738 | 0.55852 |
| 439 | 2911.80904 | 20.06285 | 7963.59057  | 537.46420 | 5.35488  | 0.27613 | 330.00601 | 1.01522 |
| 440 | 4379.58172 | 18.87491 | 8595.02343  | 488.36645 | 1.68237  | 0.03786 | 502.87081 | 0.37045 |
| 441 | 3164.30717 | 20.04962 | 10421.88456 | 507.08815 | 4.24045  | 0.14426 | 332.42818 | 1.10693 |
| 442 | 3962.70504 | 22.98020 | 7848.27134  | 880.00746 | 3.31174  | 0.04544 | 874.25721 | 0.53279 |
| 443 | 4844.66561 | 12.70146 | 15135.82209 | 363.11595 | 3.99612  | 0.02515 | 503.98482 | 0.31391 |
| 444 | 3394.40666 | 11.73251 | 7573.26630  | 529.92403 | 2.73616  | 0.09110 | 378.21986 | 0.77269 |
| 445 | 5077.02635 | 13.18337 | 12403.25943 | 93.38766  | -1.35712 | 0.00112 | 99.29957  | 0.40612 |
| 446 | 4889.09172 | 19.86424 | 11143.07354 | 571.57527 | 2.40301  | 0.06529 | 795.66808 | 0.37970 |
| 447 | 4276.66036 | 25.02367 | 8460.51823  | 52.43086  | 3.17074  | 0.00142 | 16.44995  | 1.33347 |
| 448 | 3812.86174 | 13.94125 | 19698.70680 | 170.89256 | 0.07326  | 0.00547 | 178.06986 | 0.43949 |
| 449 | 3123.21186 | 15.52707 | 6648.65098  | 285.22499 | 2.79816  | 0.01589 | 202.64140 | 0.27378 |
| 450 | 3742.63581 | 11.76515 | 7592.42059  | 615.09378 | 2.44189  | 0.02145 | 568.34606 | 0.55968 |
| 451 | 4367.43774 | 18.79752 | 9615.13980  | 554.56318 | 2.12380  | 0.04126 | 632.14389 | 0.34448 |
| 452 | 4546.41582 | 20.95622 | 12102.62255 | 653.34871 | 3.52720  | 0.01141 | 775.57086 | 0.24238 |
| 453 | 4804.11615 | 22.29868 | 11499.13863 | 725.92005 | 2.28175  | 0.01363 | 923.53510 | 0.27527 |
| 454 | 4207.06372 | 19.12654 | 16489.38784 | 50.04043  | 2.50729  | 0.01199 | 10.75747  | 0.82641 |
| 455 | 4664.80640 | 16.57279 | 17941.30606 | 364.16912 | 4.05319  | 0.08521 | 493.65288 | 0.45925 |
| 456 | 4726.05909 | 19.36193 | 9907.81694  | 579.48020 | 1.31142  | 0.03737 | 751.36323 | 0.28526 |
| 457 | 2894.42428 | 16.56801 | 14344.91649 | 332.96641 | 3.80267  | 0.23031 | 211.06062 | 0.71275 |
| 458 | 4006.78720 | 9.88345  | 9289.54849  | 305.20831 | -2.26075 | 0.00718 | 393.19319 | 0.20158 |
| 459 | 3832.38283 | 15.81186 | 8603.41109  | 686.92823 | 3.06648  | 0.03742 | 667.64664 | 0.54374 |
| 460 | 4571.75016 | 14.06804 | 21584.77753 | 57.93967  | -3.54961 | 0.00001 | 26.77451  | 0.36882 |
| 461 | 4672.59238 | 16.68073 | 17913.98870 | 373.74418 | 4.02745  | 0.08511 | 505.54253 | 0.46589 |
| 462 | 3680.17269 | 7.67554  | 5916.92266  | 378.33308 | -0.54235 | 0.02728 | 368.01611 | 0.51906 |
| 463 | 4675.97572 | 18.88816 | 12416.50157 | 362.73129 | 3.57614  | 0.04299 | 433.61560 | 0.39711 |
| 464 | 2480.12780 | 15.14041 | 2976.60360  | 450.49779 | 6.01949  | 0.22944 | 490.18110 | 1.46886 |
| 465 | 4521.05237 | 19.91818 | 7349.83686  | 483.05549 | 2.83327  | 0.05140 | 566.61558 | 0.44002 |
| 466 | 4872.31159 | 16.81129 | 8556.16537  | 514.67422 | 2.64685  | 0.05951 | 702.78643 | 0.40245 |
| 467 | 4381.31561 | 18.72507 | 8626.45046  | 414.97638 | 1.89567  | 0.03800 | 416.39739 | 0.37934 |
| 468 | 4896.04639 | 12.81831 | 7293.35718  | 383.11609 | 3.10594  | 0.04070 | 523.52824 | 0.23720 |
| 469 | 4608.42240 | 22.32111 | 8639.24404  | 560.24210 | 2.62158  | 0.06028 | 679.59849 | 0.36149 |
| 470 | 4685.21885 | 13.62288 | 9883.68198  | 428.57043 | 5.21463  | 0.02293 | 517.33047 | 0.20720 |
| 471 | 4502.89190 | 19.74142 | 7296.81599  | 582.38762 | 3.23414  | 0.06184 | 682.95412 | 0.43487 |
| 472 | 3576.09416 | 13.35690 | 5217.56851  | 599.37777 | 1.94663  | 0.03804 | 580.64268 | 0.68052 |
| 473 | 4610.50808 | 7.66491  | 17977.05385 | 56.57030  | -4.12462 | 0.00011 | 28.39869  | 0.86968 |
| 474 | 4680.04757 | 21.50749 | 9120.09739  | 343.36489 | 2.60046  | 0.05218 | 385.05169 | 0.54333 |
| 475 | 4551.35331 | 17.76475 | 8423.95817  | 570.30575 | 2.08236  | 0.02740 | 746.18795 | 0.30547 |
| 476 | 4752.30862 | 14.65865 | 9512.20984  | 401.22322 | 4.98858  | 0.02739 | 583.92697 | 0.33007 |
| 477 | 2516.24947 | 26.29982 | 10974.07367 | 549.27727 | 7.88618  | 0.19143 | 285.37173 | 1.38476 |
| 478 | 4661.68136 | 19.56139 | 11899.13360 | 394.25417 | 4.54174  | 0.09379 | 520.18380 | 0.49620 |
| 479 | 3629.60421 | 23.26870 | 5162.98275  | 671.20697 | 7.68113  | 0.08631 | 659.30077 | 0.42476 |
| 480 | 3784.40822 | 19.93887 | 9541.48768  | 472.43636 | -0.97593 | 0.03417 | 428.96619 | 1.22029 |
| 481 | 4941.19015 | 13.05164 | 9531.05436  | 398.49639 | 1.55366  | 0.00944 | 593.61121 | 0.18212 |
| 482 | 3545.85526 | 16.78658 | 17416.75356 | 406.14690 | 0.88347  | 0.14955 | 353.17934 | 0.74681 |
| 483 | 3550.99638 | 17.48772 | 7380.63922  | 538.25337 | 1.28811  | 0.12189 | 512.26301 | 0.82818 |
| 484 | 4707.10583 | 17.93789 | 16252.90274 | 490.92453 | 3.02288  | 0.02510 | 658.73704 | 0.20664 |
| 485 | 3222.17958 | 14.54586 | 10100.71856 | 399.51575 | 3.40913  | 0.09302 | 377.53885 | 0.46383 |
| 486 | 3136.11420 | 15.59457 | 6700.05624  | 280.15218 | 1.95043  | 0.01488 | 229.08787 | 0.18618 |
| 487 | 4741.38653 | 21.71779 | 10174.46160 | 465.49176 | 6.83464  | 0.07472 | 589.52342 | 0.42553 |
| 488 | 3396.93651 | 19.55157 | 17766.83505 | 358.97707 | 0.47555  | 0.12524 | 310.81307 | 0.75320 |
| 489 | 3673.05176 | 14.13497 | 10019.83655 | 484.82571 | 1.40912  | 0.06320 | 509.68110 | 0.65991 |
| 490 | 4772.35267 | 18.46557 | 10689.61871 | 712.31583 | 1.38429  | 0.03251 | 914.38685 | 0.36038 |
| 491 | 4575.32579 | 10.45312 | 9316.25225  | 456.06232 | -1.15160 | 0.02245 | 598.03982 | 0.20142 |

|     |             |          |             |           |          |         |           |         |
|-----|-------------|----------|-------------|-----------|----------|---------|-----------|---------|
| 492 | 4431.71597  | 15.51793 | 6378.31325  | 700.94822 | 2.72701  | 0.02856 | 763.24213 | 0.35856 |
| 493 | 3137.15154  | 16.79809 | 9539.48228  | 494.71749 | 2.55695  | 0.18157 | 421.11974 | 0.67188 |
| 494 | 4336.27608  | 19.37923 | 6365.09384  | 649.88714 | 1.87835  | 0.05773 | 693.46042 | 0.39729 |
| 495 | 4924.31682  | 7.62146  | 8954.02906  | 339.99221 | -1.31376 | 0.00075 | 504.41820 | 0.03942 |
| 496 | 3261.75630  | 18.16035 | 9807.90375  | 407.78617 | 2.25024  | 0.12961 | 321.45181 | 0.83473 |
| 497 | 4787.34026  | 22.26668 | 10689.88285 | 342.14670 | 3.42270  | 0.04987 | 406.38097 | 0.51797 |
| 498 | 4967.14711  | 9.85893  | 8842.09060  | 378.79615 | 0.65697  | 0.00722 | 542.76278 | 0.16270 |
| 499 | 5024.23600  | 18.11675 | 10125.34111 | 406.07074 | 2.38367  | 0.01534 | 580.91170 | 0.24364 |
| 500 | 3179.62182  | 18.27718 | 10645.47429 | 309.18979 | 3.26502  | 0.17633 | 212.67461 | 0.75810 |
| 501 | 3754.12001  | 12.37978 | 6481.96603  | 402.26421 | -1.10239 | 0.01719 | 432.42725 | 0.41725 |
| 502 | 4897.67459  | 12.83649 | 7291.09597  | 390.03958 | 3.03089  | 0.04042 | 521.03890 | 0.31837 |
| 503 | 4854.23015  | 13.71734 | 11897.33122 | 510.17231 | 2.48599  | 0.04407 | 647.46037 | 0.49433 |
| 504 | 3754.93639  | 12.24219 | 6501.99621  | 333.60342 | -2.60955 | 0.01499 | 346.08614 | 0.38960 |
| 505 | 4796.27991  | 10.40294 | 11111.89816 | 581.73853 | 0.11494  | 0.02759 | 745.18119 | 0.39619 |
| 506 | 4774.09776  | 10.18781 | 11610.96850 | 453.11311 | -2.34395 | 0.00749 | 609.98881 | 0.17087 |
| 507 | 4183.48349  | 23.79364 | 8380.52307  | 736.19724 | 2.38603  | 0.05700 | 784.05417 | 0.52875 |
| 508 | 3742.31322  | 11.76326 | 7582.03685  | 710.31230 | 2.05399  | 0.02478 | 706.15909 | 0.53293 |
| 509 | 4944.39048  | 13.13621 | 9369.29961  | 339.55619 | 2.17526  | 0.00967 | 510.06255 | 0.18523 |
| 510 | 4561.91327  | 14.17757 | 21035.44147 | 63.93166  | -4.59722 | 0.00008 | 26.96852  | 1.05078 |
| 511 | 3755.03476  | 12.38448 | 6490.54700  | 436.68111 | -0.26710 | 0.01755 | 471.70011 | 0.41745 |
| 512 | 4007.54231  | 9.37823  | 8973.43606  | 247.55166 | -2.90231 | 0.00630 | 276.69905 | 0.22866 |
| 513 | 3102.17694  | 19.67482 | 10603.36703 | 621.97492 | 3.98198  | 0.12693 | 480.67601 | 1.25985 |
| 514 | 4325.12655  | 18.36412 | 6820.81037  | 640.64546 | 3.36416  | 0.03008 | 684.81679 | 0.49216 |
| 515 | 4970.02326  | 9.94090  | 8509.18475  | 382.02335 | 5.24069  | 0.00937 | 546.75042 | 0.16201 |
| 516 | 4659.43683  | 7.50302  | 18079.79185 | 116.36373 | -3.79310 | 0.00004 | 139.86230 | 0.13105 |
| 517 | 4573.43636  | 10.37638 | 9296.03341  | 399.14048 | 0.02064  | 0.03319 | 490.89733 | 0.26820 |
| 518 | 3609.68005  | 17.48598 | 17129.36237 | 358.76074 | 0.10272  | 0.09883 | 297.54877 | 0.89937 |
| 519 | 4330.91442  | 15.94377 | 9234.97918  | 488.50614 | 5.52322  | 0.11691 | 663.10203 | 0.43888 |
| 520 | 4493.23303  | 20.51485 | 16039.15843 | 657.11762 | 1.83911  | 0.01302 | 797.31141 | 0.42371 |
| 521 | 4832.15150  | 14.37961 | 11014.90936 | 323.72021 | 3.72743  | 0.03145 | 484.00062 | 0.23742 |
| 522 | 4664.38000  | 24.35827 | 8648.11284  | 606.61199 | 5.29130  | 0.06015 | 719.53625 | 0.94742 |
| 523 | 4456.74325  | 20.40559 | 16317.20139 | 712.61064 | 4.00953  | 0.01687 | 883.99015 | 0.28396 |
| 524 | 5112.73943  | 10.96903 | 14649.53900 | 177.44309 | -0.63499 | 0.00290 | 250.37569 | 0.09973 |
| 525 | 4698.80286  | 7.09446  | 15582.59258 | 114.50897 | -4.76901 | 0.00002 | 137.58380 | 0.23482 |
| 526 | 4679.28087  | 21.50303 | 9108.05068  | 566.03863 | 4.25971  | 0.05850 | 694.58351 | 0.54459 |
| 527 | 5044.91267  | 13.48722 | 8943.29080  | 343.88810 | 0.09993  | 0.01374 | 507.75767 | 0.19955 |
| 528 | 2966.09517  | 24.86220 | 6511.66728  | 431.64381 | 6.03917  | 0.16718 | 205.45434 | 1.08486 |
| 529 | 4146.89039  | 16.37049 | 8962.78224  | 631.82275 | -0.88377 | 0.01825 | 696.03792 | 0.46090 |
| 530 | 4467.53382  | 20.39084 | 10332.69488 | 805.27465 | 4.48180  | 0.01955 | 965.45194 | 0.30243 |
| 531 | 4682.24324  | 18.36398 | 16759.39013 | 418.06339 | 3.98712  | 0.02985 | 567.27538 | 0.17375 |
| 532 | 4759.45806  | 18.19842 | 10685.36681 | 521.62439 | -0.14906 | 0.03319 | 689.06204 | 0.36580 |
| 533 | 3766.45262  | 11.91345 | 9258.14565  | 770.47672 | 2.27514  | 0.03340 | 763.83288 | 0.63037 |
| 534 | 4888.44491  | 9.39206  | 12701.48789 | 360.42559 | 2.84618  | 0.01999 | 537.11577 | 0.27072 |
| 535 | 4740.171606 | 21.79955 | 10200.35932 | 420.65611 | 4.28973  | 0.06196 | 516.87542 | 0.46571 |
| 536 | 4006.46738  | 9.38928  | 8892.13205  | 334.22460 | -2.92367 | 0.00608 | 410.17669 | 0.22523 |
| 537 | 4565.85663  | 20.64413 | 17676.48409 | 463.32114 | 5.93486  | 0.08876 | 579.21288 | 0.41501 |
| 538 | 4607.32862  | 22.30232 | 8626.44809  | 612.94418 | 1.71305  | 0.05093 | 777.35706 | 0.35370 |
| 539 | 3680.67762  | 7.66710  | 5911.17319  | 438.59391 | -0.04134 | 0.02608 | 460.58303 | 0.54106 |
| 540 | 3913.43626  | 12.96443 | 12063.43261 | 372.50293 | 0.21639  | 0.03466 | 419.31178 | 0.44656 |
| 541 | 4941.61112  | 13.06062 | 9536.06589  | 283.66519 | 1.77886  | 0.00912 | 417.50368 | 0.18321 |
| 542 | 4080.93866  | 21.81695 | 8931.39158  | 862.33537 | 2.38343  | 0.02925 | 832.60228 | 0.55127 |
| 543 | 3680.21307  | 7.67112  | 5906.97922  | 426.50937 | 0.25056  | 0.02592 | 422.46720 | 0.52359 |
| 544 | 4768.32226  | 21.59413 | 19682.15754 | 519.81611 | 3.49405  | 0.03689 | 665.11601 | 0.27151 |
| 545 | 4289.99626  | 18.07960 | 6904.19461  | 784.55754 | 1.67086  | 0.04827 | 838.10408 | 0.50533 |
| 546 | 3538.89551  | 16.75610 | 17414.31121 | 405.61155 | 0.87370  | 0.15038 | 360.55824 | 0.63727 |
| 547 | 4978.52090  | 17.57305 | 8080.63647  | 536.54685 | 1.87450  | 0.02070 | 704.50674 | 0.32266 |
| 548 | 3671.21445  | 14.04870 | 9981.28146  | 410.66252 | 0.79748  | 0.05980 | 422.07633 | 0.53929 |
| 549 | 4044.09327  | 9.18784  | 11374.91049 | 205.01022 | -1.21218 | 0.00776 | 267.77172 | 0.12691 |
| 550 | 3225.77293  | 14.55425 | 10151.63554 | 448.72562 | 3.58145  | 0.09353 | 491.57153 | 0.43046 |
| 551 | 2541.57960  | 16.40819 | 3510.02896  | 433.74802 | 5.22775  | 0.27331 | 496.11678 | 1.92600 |
| 552 | 4635.17176  | 15.39219 | 10149.89583 | 385.00532 | 4.85445  | 0.07865 | 549.03569 | 0.44981 |
| 553 | 3853.16217  | 11.67353 | 12287.14912 | 102.49356 | -1.76698 | 0.00304 | 71.05099  | 0.91202 |
| 554 | 3540.06191  | 17.35227 | 8061.38166  | 388.26849 | -0.67919 | 0.04351 | 373.59914 | 0.59644 |
| 555 | 4244.45229  | 17.30971 | 7628.00708  | 644.50314 | -1.62631 | 0.02161 | 726.12424 | 0.53807 |
| 556 | 3713.08643  | 24.21043 | 10658.04482 | 841.67623 | 4.45723  | 0.05703 | 736.52888 | 0.60714 |
| 557 | 2490.75711  | 14.53781 | 3610.80373  | 454.24723 | 5.82407  | 0.32174 | 439.33050 | 0.08853 |
| 558 | 3539.47652  | 9.40869  | 7352.67913  | 611.89565 | 1.95287  | 0.04351 | 571.68808 | 0.64474 |
| 559 | 3835.62641  | 23.86067 | 12162.75990 | 583.34463 | 6.44008  | 0.01955 | 670.32540 | 0.06844 |
| 560 | 4575.75379  | 7.68209  | 8857.41756  | 254.37564 | -3.61549 | 0.00356 | 343.92664 | 0.09969 |
| 561 | 3842.11405  | 20.20501 | 6347.59570  | 620.23564 | 2.55243  | 0.02500 | 584.30355 | 0.52192 |
| 562 | 4334.83956  | 17.15219 | 8147.63171  | 524.07706 | 3.32486  | 0.05087 | 540.01743 | 0.33159 |

|     |            |          |             |            |          |         |            |         |
|-----|------------|----------|-------------|------------|----------|---------|------------|---------|
| 563 | 4609.05310 | 18.89021 | 7973.26920  | 485.42371  | 4.89658  | 0.03871 | 623.04532  | 0.25147 |
| 564 | 3832.89738 | 15.79098 | 8615.42931  | 847.85561  | 3.13027  | 0.03814 | 844.72249  | 0.65248 |
| 565 | 4281.25253 | 14.22183 | 6827.17577  | 586.38583  | -1.38905 | 0.02545 | 675.58375  | 0.35459 |
| 566 | 4318.02301 | 18.28343 | 7691.45040  | 443.42387  | 5.70723  | 0.11001 | 526.33864  | 0.43166 |
| 567 | 4751.63130 | 21.59592 | 19374.45228 | 547.59179  | 4.71643  | 0.03776 | 697.77599  | 0.27742 |
| 568 | 4146.94400 | 16.37782 | 9014.33212  | 692.36421  | -0.17061 | 0.01755 | 762.10163  | 0.43484 |
| 569 | 4318.74431 | 18.29668 | 7713.45948  | 513.23324  | 5.90596  | 0.11033 | 606.35530  | 0.44015 |
| 570 | 3238.50901 | 18.20671 | 18007.39584 | 392.29895  | 3.05854  | 0.19847 | 296.24554  | 1.15266 |
| 571 | 2446.40590 | 13.58077 | 3710.74841  | 320.88382  | 6.72082  | 0.23693 | 280.34434  | 0.35400 |
| 572 | 4291.01394 | 18.11856 | 6911.24893  | 691.07514  | 2.00687  | 0.05676 | 757.38423  | 0.45366 |
| 573 | 4573.13730 | 7.60286  | 8607.66732  | 363.38759  | -0.90234 | 0.00516 | 509.27559  | 0.12946 |
| 574 | 4462.28170 | 21.72982 | 8020.45304  | 389.73099  | 2.95531  | 0.03023 | 501.37416  | 0.34457 |
| 575 | 4418.77685 | 17.91020 | 7188.73980  | 616.89080  | 1.22659  | 0.03889 | 750.12070  | 0.36497 |
| 576 | 4890.64113 | 12.71762 | 7284.54435  | 425.87926  | 2.28986  | 0.03804 | 588.88838  | 0.30092 |
| 577 | 3373.54909 | 20.31643 | 10644.71408 | 231.83646  | 4.83080  | 0.01917 | 278.34616  | 0.94308 |
| 578 | 4885.66765 | 9.31697  | 12566.44123 | 339.00199  | 1.78069  | 0.01557 | 495.84780  | 0.27108 |
| 579 | 3754.47960 | 12.38274 | 6486.70535  | 404.56889  | 0.28845  | 0.01772 | 445.52903  | 0.41696 |
| 580 | 4367.71054 | 18.88616 | 9566.21184  | 565.42070  | 2.37242  | 0.04459 | 649.98296  | 0.40189 |
| 581 | 3753.71943 | 12.35330 | 6482.78565  | 338.13107  | -1.10086 | 0.01457 | 356.05475  | 0.41600 |
| 582 | 4267.25590 | 16.23233 | 7804.00860  | 603.37202  | 1.42683  | 0.03817 | 641.34727  | 0.50879 |
| 583 | 3334.30215 | 24.25923 | 11566.46322 | 509.23890  | 4.03779  | 0.06532 | 424.95039  | 0.65418 |
| 584 | 4875.82109 | 7.73292  | 9580.86018  | 437.80546  | 1.32361  | 0.01205 | 608.04380  | 0.20176 |
| 585 | 5003.01489 | 7.78008  | 14891.87899 | 177.89120  | -0.44101 | 0.00194 | 255.79006  | 0.08630 |
| 586 | 4430.28244 | 15.50488 | 6374.73348  | 607.75485  | 3.63993  | 0.02910 | 645.65611  | 0.36378 |
| 587 | 3181.79652 | 16.49190 | 7091.16302  | 388.69687  | 2.96643  | 0.12055 | 298.04052  | 0.70290 |
| 588 | 4604.22430 | 20.65572 | 22451.66051 | 486.55031  | 4.73857  | 0.07807 | 631.86870  | 0.48650 |
| 589 | 4247.00275 | 19.01539 | 7270.38610  | 515.79555  | 2.23026  | 0.04508 | 544.99678  | 0.45938 |
| 590 | 4367.41504 | 18.79692 | 9614.92566  | 363.24899  | 1.89514  | 0.04236 | 369.34256  | 0.33649 |
| 591 | 5010.59928 | 9.98038  | 9311.88212  | 249.19712  | 0.54194  | 0.00486 | 361.36306  | 0.15809 |
| 592 | 4753.77794 | 14.67254 | 9451.48831  | 392.85164  | 4.76571  | 0.02755 | 574.22085  | 0.32877 |
| 593 | 3505.53499 | 15.38652 | 11578.23727 | 315.40784  | 1.18525  | 0.08463 | 247.59804  | 0.43638 |
| 594 | 3692.57049 | 14.14522 | 10399.76246 | 482.19850  | 0.51135  | 0.05774 | 462.81151  | 0.58531 |
| 595 | 4479.29583 | 20.71026 | 9703.14282  | 275.13133  | 5.84990  | 0.10341 | 263.94803  | 0.51500 |
| 596 | 4523.03166 | 20.85602 | 11767.48765 | 673.10560  | 4.47347  | 0.01728 | 856.29078  | 0.31485 |
| 597 | 4462.68985 | 21.72798 | 8024.91359  | 404.73360  | 3.83267  | 0.03044 | 483.35317  | 0.36565 |
| 598 | 5003.85708 | 7.80312  | 13084.64448 | 124.98165  | 1.32834  | 0.00234 | 152.47693  | 0.06590 |
| 599 | 4056.05577 | 11.58870 | 14690.85507 | 130.24003  | -2.15234 | 0.00288 | 139.18515  | 1.25135 |
| 600 | 4802.09986 | 16.90044 | 9942.47145  | 671.73914  | 0.52484  | 0.03198 | 883.06896  | 0.36219 |
| 601 | 4710.52742 | 15.79219 | 11051.16561 | 454.42241  | 2.99552  | 0.05175 | 617.62453  | 0.32528 |
| 602 | 4643.54284 | 20.77578 | 9178.98925  | 401.40054  | 4.42301  | 0.07059 | 476.25567  | 0.49588 |
| 603 | 5093.31812 | 13.34457 | 10150.54698 | 75.76482   | -2.09974 | 0.00098 | 64.47746   | 0.37804 |
| 604 | 4890.37666 | 9.40312  | 10117.84197 | 549.90144  | 1.83019  | 0.03159 | 728.59474  | 0.40087 |
| 605 | 4556.97715 | 20.52494 | 17107.04998 | 462.20938  | 4.63701  | 0.09694 | 596.90814  | 0.39198 |
| 606 | 4779.01452 | 10.37340 | 11640.33830 | 598.40736  | -1.13626 | 0.00939 | 816.01501  | 0.13265 |
| 607 | 4247.09060 | 19.01611 | 7264.46902  | 578.67358  | 4.05764  | 0.04662 | 617.87527  | 0.45877 |
| 608 | 4759.35754 | 18.17676 | 10716.54942 | 645.43355  | 0.83318  | 0.03272 | 822.40489  | 0.35995 |
| 609 | 4885.06362 | 19.81515 | 11125.94339 | 434.73815  | 2.28197  | 0.05975 | 600.30581  | 0.39105 |
| 610 | 4767.37456 | 8.09130  | 9395.41064  | 312.59207  | -1.82593 | 0.00300 | 448.73871  | 0.07256 |
| 611 | 4345.20590 | 23.78774 | 10431.39671 | 880.41271  | 3.52593  | 0.03262 | 921.61866  | 0.55439 |
| 612 | 4977.93374 | 9.90309  | 9391.71798  | 370.67080  | 0.39355  | 0.00692 | 520.78953  | 0.14587 |
| 613 | 4237.12757 | 23.41257 | 12375.72758 | 1001.91016 | 3.34208  | 0.01092 | 1103.31052 | 0.15720 |
| 614 | 3855.94971 | 25.27649 | 6738.63113  | 70.76843   | 3.41942  | 0.00594 | 25.40500   | 1.60627 |
| 615 | 4878.85158 | 7.75476  | 10011.33813 | 464.39942  | 0.25526  | 0.00803 | 620.93515  | 0.23978 |
| 616 | 4658.61070 | 19.51687 | 12325.83666 | 394.69499  | 4.85889  | 0.09662 | 526.68433  | 0.44234 |
| 617 | 4604.71551 | 22.17449 | 10971.77210 | 427.57524  | 5.41416  | 0.06774 | 500.98373  | 0.58067 |
| 618 | 5008.82097 | 10.08969 | 9142.93734  | 346.17578  | 0.37258  | 0.00468 | 516.39288  | 0.15054 |
| 619 | 3616.04103 | 13.30239 | 20682.77211 | 233.41389  | 1.04059  | 0.01607 | 277.36005  | 0.24880 |
| 620 | 4575.16490 | 10.47728 | 9318.94382  | 353.93695  | -2.56157 | 0.02111 | 432.59895  | 0.21351 |
| 621 | 4339.08319 | 17.14026 | 8212.90318  | 364.56028  | 3.03210  | 0.03787 | 318.30936  | 0.36058 |
| 622 | 5012.78877 | 10.00168 | 9471.58224  | 302.37948  | -0.87820 | 0.00485 | 449.71310  | 0.15195 |
| 623 | 3105.72408 | 18.12501 | 10180.66714 | 411.86697  | 3.77178  | 0.17757 | 377.39124  | 0.82948 |
| 624 | 4665.11847 | 20.13141 | 8159.71711  | 355.52432  | 4.54287  | 0.04761 | 498.98359  | 0.24857 |
| 625 | 4328.78163 | 15.86060 | 9181.76714  | 462.36261  | 7.45301  | 0.11895 | 628.61359  | 0.43741 |
| 626 | 4735.44524 | 21.70571 | 10143.22838 | 520.92173  | 4.00566  | 0.06743 | 649.37711  | 0.48163 |
| 627 | 4969.15477 | 17.22341 | 8722.68713  | 714.47595  | 0.35285  | 0.01810 | 920.42758  | 0.26987 |
| 628 | 4669.51444 | 20.15507 | 9978.29423  | 446.75740  | 4.24717  | 0.04713 | 640.21130  | 0.24606 |
| 629 | 4769.83790 | 8.15764  | 9891.60655  | 342.55277  | -3.53533 | 0.00277 | 497.41211  | 0.06757 |
| 630 | 4441.45140 | 21.74339 | 7592.70199  | 571.36812  | 2.63553  | 0.03106 | 723.66108  | 0.31517 |
| 631 | 4920.15703 | 10.81880 | 8633.78881  | 90.16643   | 4.05595  | 0.00669 | 78.11639   | 0.09698 |
| 632 | 3219.22252 | 16.51370 | 12225.85826 | 322.06374  | 2.13663  | 0.08347 | 231.17329  | 0.79968 |
| 633 | 4982.23609 | 9.97149  | 9447.07261  | 294.74778  | 0.27254  | 0.00680 | 402.33639  | 0.15924 |

|     |            |          |             |            |          |         |            |         |
|-----|------------|----------|-------------|------------|----------|---------|------------|---------|
| 634 | 4239.65424 | 24.68780 | 8280.13117  | 701.32111  | 1.83122  | 0.02108 | 789.81421  | 0.30626 |
| 635 | 3582.30792 | 13.19058 | 5370.50251  | 586.98179  | 0.88313  | 0.04164 | 558.78524  | 0.56998 |
| 636 | 4639.52223 | 7.48564  | 17937.44435 | 97.48663   | -3.81576 | 0.00002 | 112.25427  | 0.10586 |
| 637 | 4002.73514 | 18.30107 | 14266.06077 | 96.45549   | 1.09637  | 0.01225 | 68.37248   | 1.43701 |
| 638 | 4198.99872 | 21.01303 | 10552.30821 | 628.39131  | 2.74351  | 0.03369 | 596.58686  | 0.54646 |
| 639 | 5011.90580 | 6.81077  | 9327.32894  | 153.98620  | -2.36360 | 0.00122 | 201.40377  | 0.03273 |
| 640 | 4739.27581 | 21.78616 | 10188.33039 | 375.54440  | 5.05832  | 0.05247 | 469.67862  | 0.49429 |
| 641 | 4367.33374 | 18.88704 | 9568.00340  | 488.35612  | 2.79815  | 0.04384 | 544.11662  | 0.34816 |
| 642 | 3151.70840 | 20.07425 | 10476.16413 | 554.26922  | 4.36426  | 0.12814 | 421.90074  | 1.26224 |
| 643 | 3222.39724 | 14.52232 | 10069.66252 | 374.68332  | 3.32724  | 0.08111 | 387.69333  | 0.44606 |
| 644 | 3361.46723 | 20.21518 | 10873.23672 | 221.49241  | 3.23714  | 0.01304 | 241.62067  | 1.05873 |
| 645 | 4698.16371 | 19.14897 | 9862.23494  | 639.22171  | 1.50786  | 0.04874 | 806.20233  | 0.30528 |
| 646 | 3606.84385 | 13.22940 | 20144.35620 | 387.82187  | 1.52049  | 0.02183 | 476.49508  | 0.40467 |
| 647 | 4333.94958 | 17.20939 | 8152.43906  | 491.02205  | 4.11173  | 0.04511 | 474.00060  | 0.42524 |
| 648 | 4455.25738 | 19.56347 | 5699.74389  | 534.79817  | 3.65521  | 0.03328 | 619.37380  | 0.41516 |
| 649 | 4794.04792 | 10.34127 | 11103.61432 | 428.27220  | 1.56323  | 0.03014 | 530.06870  | 0.45488 |
| 650 | 3697.44993 | 21.71852 | 12276.75479 | 102.93859  | 3.70899  | 0.01257 | 68.15515   | 0.75279 |
| 651 | 3753.77882 | 12.42415 | 6482.45251  | 315.94915  | -0.40336 | 0.01416 | 336.54403  | 0.41552 |
| 652 | 3700.77458 | 25.34957 | 12907.82833 | 68.73120   | 2.79143  | 0.01053 | 21.92965   | 1.56363 |
| 653 | 4713.22762 | 17.87154 | 16182.44651 | 417.42663  | 3.02832  | 0.02454 | 558.38732  | 0.21999 |
| 654 | 4445.63070 | 19.99770 | 13389.83695 | 447.88133  | 6.07922  | 0.10705 | 517.49744  | 0.31688 |
| 655 | 3474.68797 | 13.91980 | 7302.51548  | 522.65470  | 1.95486  | 0.06360 | 484.26281  | 0.55854 |
| 656 | 3239.88357 | 17.07480 | 7100.23240  | 362.70681  | 2.04230  | 0.10872 | 277.05050  | 0.68070 |
| 657 | 3908.22958 | 24.67487 | 10045.92103 | 1437.67475 | 7.45995  | 0.01407 | 1295.28016 | 0.36901 |
| 658 | 4241.88879 | 19.17691 | 7232.52634  | 510.69522  | 4.13182  | 0.04750 | 542.04569  | 0.49786 |
| 659 | 3754.68548 | 12.94905 | 13578.86202 | 158.49273  | 0.26434  | 0.00483 | 148.35376  | 0.35448 |
| 660 | 4425.66707 | 11.53593 | 8397.63835  | 579.29872  | -0.21508 | 0.01171 | 714.93837  | 0.24123 |
| 661 | 4399.83397 | 6.57534  | 8087.88042  | 468.88627  | -2.57000 | 0.00348 | 620.59424  | 0.06659 |
| 662 | 4649.30291 | 22.37593 | 9745.61734  | 596.14469  | 2.79460  | 0.03391 | 757.53262  | 0.44891 |
| 663 | 3134.36117 | 13.92861 | 8602.76837  | 548.95574  | 4.12526  | 0.31780 | 384.26968  | 0.84343 |
| 664 | 3833.29233 | 15.80404 | 8630.64002  | 702.45785  | 2.44208  | 0.03181 | 695.43574  | 0.52859 |
| 665 | 4381.16590 | 18.72562 | 8625.00498  | 669.94262  | 1.55708  | 0.03740 | 740.39517  | 0.37357 |
| 666 | 4644.30569 | 20.79202 | 9172.98252  | 348.24068  | 5.08330  | 0.07393 | 399.35890  | 0.50133 |
| 667 | 4338.42691 | 17.12884 | 8212.12826  | 410.09185  | 1.81807  | 0.03920 | 386.18010  | 0.35132 |
| 668 | 3113.72173 | 19.73513 | 10643.16424 | 471.62534  | 3.86076  | 0.12886 | 316.78924  | 1.20011 |
| 669 | 3624.77295 | 23.25029 | 5129.96229  | 546.10853  | 7.10571  | 0.07560 | 546.17246  | 0.54283 |
| 670 | 2571.96368 | 15.24572 | 10992.34513 | 390.87686  | 5.74230  | 0.25777 | 349.26792  | 0.75353 |
| 671 | 3487.53654 | 13.78223 | 7414.86979  | 513.23647  | 0.50423  | 0.05243 | 473.07581  | 0.71871 |
| 672 | 4692.10584 | 15.38904 | 14120.43517 | 331.85389  | 3.98281  | 0.05712 | 458.02422  | 0.31715 |
| 673 | 2543.81651 | 16.87107 | 3561.15778  | 454.22752  | 5.58890  | 0.09421 | 460.49315  | 2.02298 |
| 674 | 4756.99439 | 21.60463 | 19554.24705 | 460.35542  | 4.80019  | 0.03697 | 586.58854  | 0.33413 |
| 675 | 4522.62589 | 19.93410 | 7355.88562  | 604.70125  | 2.02010  | 0.04678 | 744.66429  | 0.43685 |
| 676 | 4409.61136 | 22.70546 | 8373.42275  | 654.79279  | 4.60790  | 0.01728 | 857.77303  | 0.29279 |
| 677 | 3915.35043 | 12.93042 | 12082.90987 | 347.98385  | 0.25498  | 0.03631 | 363.17351  | 0.44330 |
| 678 | 3599.49058 | 13.03309 | 24902.00961 | 304.76247  | 0.55284  | 0.01592 | 362.44246  | 0.30462 |
| 679 | 4381.05544 | 18.73396 | 8621.98473  | 591.36863  | 1.77777  | 0.03921 | 648.90237  | 0.37019 |
| 680 | 3776.90804 | 9.59519  | 8271.13081  | 405.50575  | 0.28852  | 0.04431 | 367.29612  | 0.60493 |
| 681 | 4671.00860 | 20.16685 | 9972.54052  | 342.01791  | 4.20835  | 0.04504 | 472.27044  | 0.27697 |
| 682 | 4033.07270 | 25.75998 | 8828.31922  | 839.90728  | 3.89777  | 0.01686 | 907.85711  | 0.45217 |
| 683 | 3635.88365 | 12.66591 | 27125.93427 | 211.15750  | 0.11469  | 0.01486 | 204.43485  | 0.48513 |
| 684 | 4287.01267 | 17.67918 | 7494.29332  | 613.11384  | 2.86135  | 0.04249 | 640.85428  | 0.49904 |
| 685 | 4748.50719 | 16.00289 | 21029.70113 | 398.29947  | 3.07782  | 0.05343 | 543.36343  | 0.62569 |
| 686 | 4466.65412 | 20.38911 | 10265.89200 | 586.23046  | 4.17723  | 0.02087 | 738.66602  | 0.31744 |
| 687 | 4911.09328 | 12.73913 | 7834.69480  | 278.52681  | 1.92868  | 0.03763 | 354.21504  | 0.32286 |
| 688 | 4331.96766 | 18.55187 | 7793.17031  | 462.26060  | 6.67032  | 0.09748 | 556.82665  | 0.45893 |
| 689 | 4414.18177 | 17.85397 | 7171.85629  | 638.90846  | 2.13211  | 0.05328 | 731.49461  | 0.37830 |
| 690 | 4367.51507 | 18.85875 | 9569.49799  | 428.96267  | 3.32648  | 0.05286 | 450.89435  | 0.37101 |
| 691 | 4720.53333 | 29.64461 | 11339.96869 | 34.57334   | -0.33988 | 0.00090 | 4.69885    | 1.69987 |
| 692 | 3335.86335 | 24.26070 | 11543.99878 | 669.16829  | 4.75300  | 0.06798 | 613.90657  | 0.77113 |
| 693 | 3768.53827 | 9.60080  | 8347.55958  | 469.67038  | 0.59248  | 0.05455 | 458.63241  | 0.50497 |
| 694 | 3610.86548 | 13.24489 | 20582.74725 | 223.87942  | 1.53604  | 0.01637 | 239.27004  | 0.26792 |
| 695 | 2920.17339 | 16.94402 | 14722.42875 | 305.82271  | 3.81436  | 0.23809 | 198.61283  | 0.71862 |
| 696 | 4527.72039 | 20.05027 | 21819.66420 | 427.87534  | 5.93685  | 0.11715 | 547.91436  | 0.26366 |
| 697 | 4565.05876 | 22.53239 | 12822.18765 | 529.41468  | 5.76206  | 0.03458 | 645.77891  | 0.37191 |
| 698 | 3886.61869 | 20.31126 | 12535.53493 | 103.35441  | 2.90331  | 0.01137 | 68.02800   | 0.93251 |
| 699 | 4505.67384 | 16.68382 | 8497.76408  | 571.95411  | 0.14110  | 0.03492 | 708.74298  | 0.36903 |
| 700 | 3137.33247 | 16.79866 | 9535.73265  | 452.28689  | 2.81499  | 0.19230 | 363.26068  | 0.66016 |
| 701 | 4826.17755 | 22.36693 | 10522.60202 | 736.03867  | 3.13089  | 0.01997 | 948.41007  | 0.27712 |
| 702 | 3673.28481 | 14.10214 | 10018.76878 | 538.50159  | 0.83407  | 0.06364 | 562.95407  | 0.65409 |
| 703 | 2915.15885 | 16.20452 | 15966.69299 | 297.66302  | 3.71432  | 0.22426 | 271.55109  | 0.84909 |
| 704 | 3737.98314 | 12.95665 | 13663.93794 | 126.83569  | -0.79396 | 0.00348 | 132.95829  | 0.24206 |

|     |            |          |             |            |          |         |            |         |
|-----|------------|----------|-------------|------------|----------|---------|------------|---------|
| 705 | 2980.50916 | 24.89310 | 7040.75706  | 476.78478  | 5.85823  | 0.15034 | 254.92293  | 1.04335 |
| 706 | 4770.41057 | 14.71872 | 11059.67008 | 319.62131  | 2.52101  | 0.01920 | 447.51964  | 0.38556 |
| 707 | 4338.19855 | 18.66624 | 7822.26465  | 378.67311  | 6.56510  | 0.08962 | 427.96750  | 0.47806 |
| 708 | 3656.21580 | 23.86060 | 10510.11029 | 1176.12534 | 9.57653  | 0.07188 | 918.25648  | 0.77520 |
| 709 | 4685.71139 | 13.69517 | 9863.51756  | 421.02888  | 6.15925  | 0.02377 | 518.69814  | 0.21866 |
| 710 | 4404.89267 | 18.22419 | 15033.62657 | 55.91930   | 1.32132  | 0.00735 | 13.08857   | 1.27310 |
| 711 | 3486.62372 | 24.08914 | 11481.99762 | 779.81160  | 8.36289  | 0.15614 | 443.73664  | 1.96651 |
| 712 | 5112.54029 | 10.95557 | 14084.24553 | 169.05132  | 0.16341  | 0.00242 | 247.11126  | 0.15970 |
| 713 | 4894.00330 | 9.46332  | 10018.45516 | 429.94073  | 0.06085  | 0.02445 | 540.47801  | 0.40973 |
| 714 | 3215.83562 | 14.46663 | 10033.69763 | 308.39838  | 2.88716  | 0.09320 | 320.94785  | 0.36884 |
| 715 | 4195.62558 | 21.01468 | 10525.50036 | 686.93146  | 2.43158  | 0.03467 | 732.75530  | 0.53791 |
| 716 | 4879.19874 | 7.75844  | 10070.03819 | 342.77701  | -0.49715 | 0.00836 | 450.66122  | 0.24370 |
| 717 | 4694.55755 | 15.41858 | 14156.26719 | 401.93272  | 3.86140  | 0.06064 | 566.80687  | 0.34913 |
| 718 | 3286.34636 | 18.70488 | 18857.04823 | 435.66822  | 2.28899  | 0.20715 | 395.27012  | 0.92686 |
| 719 | 5021.84378 | 13.84719 | 8339.61279  | 424.78607  | 2.30327  | 0.01809 | 630.46349  | 0.16972 |
| 720 | 4774.29702 | 10.20068 | 11721.17809 | 368.80559  | -1.90407 | 0.00746 | 491.25124  | 0.18941 |
| 721 | 4492.20907 | 12.53221 | 9284.42966  | 499.45994  | -0.95538 | 0.02741 | 581.65172  | 0.27529 |
| 722 | 2977.38192 | 16.97618 | 15643.98750 | 369.56025  | 3.03752  | 0.13731 | 351.65732  | 0.83514 |
| 723 | 4604.91251 | 20.65465 | 22367.36883 | 524.67596  | 5.83141  | 0.09755 | 686.46222  | 0.48345 |
| 724 | 3983.70732 | 22.96449 | 7935.17492  | 793.79074  | 2.15404  | 0.03449 | 850.93423  | 0.52110 |
| 725 | 4813.14933 | 20.78387 | 7736.63285  | 514.81924  | 3.93767  | 0.05099 | 630.94699  | 0.41814 |
| 726 | 4576.17557 | 10.22615 | 9305.75473  | 377.26078  | -3.95185 | 0.02060 | 480.25507  | 0.18885 |
| 727 | 4913.99856 | 20.00119 | 11546.86539 | 371.03329  | 2.56788  | 0.05067 | 500.39803  | 0.40978 |
| 728 | 4806.36616 | 22.31174 | 10805.46829 | 668.49481  | 2.89516  | 0.01410 | 864.87019  | 0.17775 |
| 729 | 4860.77344 | 8.99782  | 9318.53696  | 99.53572   | 0.40140  | 0.00373 | 86.36418   | 0.72559 |
| 730 | 4811.53920 | 22.38706 | 10473.64180 | 760.06903  | 2.96583  | 0.01541 | 977.50159  | 0.25234 |
| 731 | 4878.64862 | 16.86338 | 8598.91257  | 384.89961  | 3.21011  | 0.05099 | 497.05282  | 0.42033 |
| 732 | 4751.63472 | 14.64309 | 9502.90211  | 412.85766  | 3.25792  | 0.02477 | 595.20878  | 0.34334 |
| 733 | 4894.09454 | 12.79008 | 7348.14672  | 410.27903  | 3.09132  | 0.04037 | 555.59493  | 0.30194 |
| 734 | 4573.51293 | 10.36124 | 9292.15195  | 500.48193  | -0.37189 | 0.03420 | 614.36418  | 0.28625 |
| 735 | 4665.10026 | 20.15476 | 8174.76639  | 374.66011  | 4.48784  | 0.04619 | 534.51410  | 0.24394 |
| 736 | 4481.84079 | 14.25078 | 21257.94349 | 83.02490   | -4.04141 | 0.00026 | 56.36689   | 0.74807 |
| 737 | 3487.59351 | 13.79782 | 7414.06342  | 452.56340  | 0.66574  | 0.05327 | 387.61546  | 0.71431 |
| 738 | 3666.83904 | 21.51909 | 13137.95431 | 99.76893   | 1.93283  | 0.01541 | 53.97535   | 1.04121 |
| 739 | 3868.25089 | 24.39694 | 6325.13419  | 1166.30569 | 4.73623  | 0.01776 | 1080.71942 | 0.68719 |
| 740 | 4458.15639 | 19.58206 | 5695.27307  | 544.92452  | 2.44532  | 0.03272 | 642.25367  | 0.41011 |
| 741 | 3241.06948 | 19.78079 | 13375.11006 | 377.37840  | 2.56528  | 0.18384 | 301.10814  | 0.90911 |
| 742 | 3246.66360 | 18.18668 | 18203.34714 | 442.60070  | 3.34609  | 0.21907 | 361.58695  | 1.20638 |
| 743 | 2442.83356 | 13.60637 | 3630.12118  | 404.85566  | 6.06037  | 0.25191 | 487.36654  | 0.70391 |
| 744 | 3923.16911 | 18.58749 | 6871.47131  | 689.71551  | 6.55960  | 0.05713 | 630.48149  | 0.63799 |
| 745 | 4232.53062 | 14.63936 | 14372.67171 | 99.54585   | -0.92127 | 0.00131 | 88.29200   | 0.97853 |
| 746 | 4044.14022 | 9.11166  | 11189.75668 | 260.68777  | -1.09140 | 0.00887 | 358.76603  | 0.16742 |
| 747 | 4674.09055 | 20.15465 | 7801.60962  | 374.15136  | 4.88453  | 0.04712 | 526.10638  | 0.25387 |
| 748 | 4469.70730 | 20.41163 | 13677.42448 | 385.63045  | 6.52393  | 0.10415 | 432.12315  | 0.48355 |
| 749 | 4241.03631 | 17.40408 | 7590.10394  | 780.17415  | 2.05380  | 0.03031 | 861.07137  | 0.35250 |
| 750 | 3833.21163 | 15.81033 | 8618.15708  | 845.78178  | 2.76609  | 0.03756 | 812.62667  | 0.63567 |
| 751 | 4948.59143 | 7.26553  | 9545.40245  | 269.36006  | -4.61826 | 0.00024 | 385.00902  | 0.02444 |
| 752 | 4079.72972 | 21.82322 | 8924.29871  | 688.38451  | 2.41608  | 0.02975 | 692.09854  | 0.50075 |
| 753 | 4890.37569 | 9.34794  | 10185.78489 | 403.57870  | -2.05143 | 0.02356 | 521.05901  | 0.43928 |
| 754 | 3913.51206 | 12.92492 | 12467.38624 | 263.46126  | -0.92086 | 0.03454 | 275.23594  | 0.32341 |
| 755 | 4706.92407 | 11.09869 | 15929.05992 | 129.38511  | 2.80303  | 0.00508 | 158.22325  | 0.24229 |
| 756 | 3060.76009 | 19.49826 | 10735.44744 | 483.09109  | 3.65101  | 0.12251 | 345.45037  | 1.04781 |
| 757 | 4783.24128 | 16.53199 | 9812.15404  | 518.21730  | 0.57720  | 0.02973 | 680.63127  | 0.28422 |
| 758 | 4874.96347 | 7.71480  | 9734.80828  | 435.01540  | 0.23923  | 0.00942 | 606.62262  | 0.25128 |
| 759 | 4944.67453 | 13.13317 | 9447.97639  | 373.70229  | 2.89411  | 0.00906 | 578.05159  | 0.19130 |
| 760 | 3865.68665 | 24.38532 | 6319.60974  | 856.22063  | 3.36641  | 0.01903 | 806.21735  | 0.72444 |
| 761 | 4457.79745 | 21.77166 | 7647.62645  | 361.58785  | 3.17390  | 0.03664 | 435.37195  | 0.25833 |
| 762 | 4512.47529 | 22.86617 | 7785.78583  | 342.78017  | 5.72977  | 0.15406 | 341.46590  | 0.70726 |
| 763 | 4232.86079 | 18.88139 | 6836.49468  | 679.22045  | 1.94722  | 0.04476 | 731.05213  | 0.54426 |
| 764 | 3539.72961 | 17.34311 | 8061.09847  | 379.80322  | -1.22781 | 0.04324 | 357.29179  | 0.60112 |
| 765 | 3745.99793 | 12.32060 | 6410.39175  | 319.10539  | -2.91307 | 0.01524 | 325.97919  | 0.39957 |
| 766 | 3404.52217 | 19.98800 | 7660.45616  | 114.15100  | 4.48966  | 0.01159 | 77.94543   | 1.19572 |
| 767 | 3594.33162 | 23.15165 | 9471.12875  | 1091.68333 | 9.43895  | 0.07120 | 816.48940  | 1.16642 |
| 768 | 4737.74879 | 15.91416 | 12178.13969 | 428.60519  | 3.14956  | 0.04598 | 592.74685  | 0.41843 |
| 769 | 3836.78363 | 20.21731 | 6310.74635  | 764.06574  | 2.21580  | 0.02842 | 724.92712  | 0.36127 |
| 770 | 4969.84080 | 17.26114 | 7946.57052  | 620.02426  | 0.90841  | 0.01831 | 815.94937  | 0.30348 |
| 771 | 4615.65885 | 22.40857 | 8681.36757  | 726.85739  | 2.42112  | 0.04114 | 900.25563  | 0.42293 |
| 772 | 4443.19068 | 20.43620 | 8267.99475  | 602.78638  | 4.06512  | 0.10925 | 703.71797  | 0.56343 |
| 773 | 4882.36755 | 19.78650 | 11067.59357 | 497.86491  | 2.97919  | 0.07582 | 690.82400  | 0.35144 |
| 774 | 4649.23509 | 20.88010 | 8746.73813  | 530.11615  | 4.68122  | 0.09415 | 622.09099  | 0.55527 |
| 775 | 4673.18478 | 20.19336 | 9989.99146  | 410.81556  | 5.04279  | 0.04080 | 579.47763  | 0.30423 |

|     |            |          |             |           |          |         |           |         |
|-----|------------|----------|-------------|-----------|----------|---------|-----------|---------|
| 776 | 3542.04698 | 17.36771 | 8058.62006  | 446.83317 | 0.42201  | 0.05282 | 455.58192 | 0.58559 |
| 777 | 5021.23267 | 18.12505 | 10063.04759 | 325.82043 | 2.00162  | 0.01465 | 460.73800 | 0.25671 |
| 778 | 4040.99227 | 9.18652  | 11738.61798 | 267.54600 | -1.04184 | 0.00677 | 370.52299 | 0.12143 |
| 779 | 3380.54147 | 9.59362  | 6919.28684  | 483.01516 | 1.75983  | 0.05506 | 503.43358 | 0.53465 |
| 780 | 3140.77935 | 18.31701 | 10285.35770 | 518.07818 | 3.45370  | 0.18479 | 489.24212 | 0.79277 |
| 781 | 3638.42093 | 17.53174 | 17139.13184 | 420.57193 | -0.03411 | 0.09830 | 386.00936 | 0.95713 |
| 782 | 4666.11288 | 18.77762 | 12270.29257 | 519.79989 | 3.81396  | 0.04531 | 664.19610 | 0.34880 |
| 783 | 3396.50121 | 11.71418 | 7562.88226  | 599.14996 | 1.34056  | 0.08116 | 474.89099 | 0.70592 |
| 784 | 4380.40629 | 18.88046 | 8600.89889  | 564.60520 | 3.04343  | 0.04011 | 587.99376 | 0.43287 |
| 785 | 3396.17980 | 11.75064 | 7605.17053  | 612.51194 | 1.50684  | 0.08439 | 549.86209 | 0.57644 |
| 786 | 4768.39391 | 8.13233  | 9563.76204  | 426.22427 | -2.69748 | 0.00328 | 615.02725 | 0.07791 |
| 787 | 4890.64658 | 19.87207 | 11177.08920 | 452.58941 | 2.88724  | 0.06213 | 622.13881 | 0.39249 |
| 788 | 4788.58640 | 16.67039 | 9866.71410  | 481.78923 | 0.69379  | 0.04350 | 623.70472 | 0.35746 |
| 789 | 3379.90460 | 9.58761  | 6921.78055  | 413.27794 | 1.93793  | 0.05800 | 397.65016 | 0.54520 |
| 790 | 4350.63062 | 18.87254 | 7898.56881  | 526.79927 | 5.87861  | 0.12896 | 667.59788 | 0.48657 |
| 791 | 4767.98465 | 21.64886 | 20230.62944 | 672.52016 | 3.79038  | 0.03543 | 881.55759 | 0.34575 |
| 792 | 4844.65265 | 15.77082 | 8821.71053  | 355.18062 | 2.69174  | 0.02551 | 518.34010 | 0.24386 |
| 793 | 4569.62131 | 22.53360 | 13111.78921 | 375.45223 | 5.76247  | 0.02766 | 433.23659 | 0.42219 |
| 794 | 2917.97599 | 16.56673 | 15044.45268 | 298.24298 | 4.21301  | 0.19782 | 276.12145 | 0.66890 |
| 795 | 3733.82733 | 13.06267 | 13721.09913 | 163.22710 | -0.86421 | 0.00369 | 180.39980 | 0.24961 |
| 796 | 4129.86534 | 12.94042 | 12589.56687 | 291.55194 | -0.28709 | 0.00585 | 368.95770 | 0.15984 |
| 797 | 3524.81196 | 17.29744 | 7944.12599  | 486.05135 | 1.11093  | 0.06917 | 507.56247 | 0.60232 |
| 798 | 4828.62299 | 14.31414 | 10782.28144 | 404.53487 | 3.05614  | 0.03009 | 608.99778 | 0.20188 |
| 799 | 3844.07667 | 20.22839 | 6348.84981  | 759.72179 | 2.39722  | 0.02329 | 765.79820 | 0.51577 |
| 800 | 4107.41713 | 12.47582 | 15508.49613 | 104.49976 | -2.35542 | 0.00252 | 89.59114  | 1.27655 |
| 801 | 3582.12112 | 13.23870 | 5363.66216  | 566.41862 | 1.56009  | 0.04360 | 540.37398 | 0.56937 |
| 802 | 3691.06917 | 24.57079 | 6220.47263  | 609.44908 | 2.67266  | 0.03357 | 570.99268 | 0.47933 |
| 803 | 4711.90282 | 15.83614 | 11381.31280 | 406.55733 | 5.08582  | 0.05606 | 528.17333 | 0.38344 |
| 804 | 4400.15442 | 15.26859 | 24628.47331 | 97.03016  | -2.39796 | 0.00033 | 88.80955  | 0.27911 |
| 805 | 4747.69971 | 15.99489 | 20771.25589 | 352.02054 | 3.55344  | 0.05379 | 474.16600 | 0.63536 |
| 806 | 3904.01990 | 13.52079 | 11264.51811 | 370.94973 | -0.77351 | 0.03111 | 381.59851 | 0.48653 |
| 807 | 4946.46977 | 13.17301 | 9384.89512  | 442.44397 | 4.55694  | 0.01094 | 661.89556 | 0.13515 |
| 808 | 3792.15525 | 19.38531 | 12340.19176 | 375.09510 | -2.23542 | 0.06817 | 331.10990 | 0.93229 |
| 809 | 4580.27166 | 17.97098 | 8264.03051  | 457.38375 | 2.65815  | 0.02704 | 590.51546 | 0.31476 |
| 810 | 4699.19048 | 18.30953 | 16552.99484 | 413.10148 | 5.78548  | 0.03506 | 549.68141 | 0.12103 |
| 811 | 4505.86742 | 11.27250 | 16780.99198 | 89.63026  | -2.47585 | 0.00009 | 94.50692  | 1.14369 |
| 812 | 4694.95137 | 13.69554 | 9890.95914  | 350.81712 | 2.83057  | 0.02083 | 417.26943 | 0.23969 |
| 813 | 4601.48426 | 22.28825 | 8589.56042  | 654.45820 | 3.42493  | 0.06449 | 810.18180 | 0.33362 |
| 814 | 3163.84198 | 15.78417 | 12075.09197 | 293.85938 | 3.97342  | 0.11782 | 137.61894 | 0.62472 |
| 815 | 4607.34246 | 18.93246 | 8429.42940  | 453.67737 | 4.55773  | 0.03918 | 593.98614 | 0.27799 |
| 816 | 4525.45255 | 20.94489 | 15223.68669 | 639.11141 | 4.46451  | 0.01308 | 786.68790 | 0.25316 |
| 817 | 4116.66757 | 15.95967 | 14242.62778 | 93.97143  | -0.78637 | 0.00288 | 75.04768  | 0.87519 |
| 818 | 4617.31333 | 18.61933 | 8335.38217  | 368.86253 | 4.39177  | 0.03138 | 465.21137 | 0.35719 |
| 819 | 4519.47654 | 20.88165 | 15153.85516 | 668.76898 | 3.65485  | 0.01556 | 823.15706 | 0.24089 |
| 820 | 3331.41541 | 24.28516 | 11539.26306 | 572.37423 | 3.82304  | 0.06387 | 526.15152 | 0.68213 |
| 821 | 4365.05105 | 20.37788 | 9920.03180  | 561.87077 | 3.59238  | 0.05068 | 604.76509 | 0.36904 |
| 822 | 4637.30499 | 16.97189 | 10121.57168 | 479.37796 | 4.94532  | 0.06779 | 666.08803 | 0.55097 |
| 823 | 4678.88388 | 10.73030 | 16715.76854 | 119.74436 | 1.72145  | 0.00867 | 132.20757 | 0.40271 |
| 824 | 3942.29126 | 18.67076 | 6928.56811  | 673.48444 | 7.17441  | 0.05601 | 588.72449 | 0.56311 |
| 825 | 4486.38885 | 21.01091 | 9239.45602  | 628.83798 | 3.26463  | 0.04286 | 801.48303 | 0.38909 |
| 826 | 4928.61931 | 7.61473  | 9088.53947  | 220.79685 | -3.32705 | 0.00046 | 307.14362 | 0.03146 |
| 827 | 4670.63477 | 16.61915 | 17904.86705 | 329.88247 | 4.75122  | 0.08789 | 439.10802 | 0.47721 |
| 828 | 4957.51854 | 6.62418  | 10611.17290 | 403.88341 | -3.00540 | 0.00605 | 588.10773 | 1.18248 |
| 829 | 4941.60525 | 13.06190 | 9396.42199  | 382.19764 | 1.89086  | 0.01073 | 577.79478 | 0.14220 |
| 830 | 3166.99112 | 15.86753 | 12047.86504 | 491.57781 | 3.31151  | 0.10878 | 440.36434 | 0.74595 |
| 831 | 4298.29192 | 15.22890 | 12192.63935 | 386.77278 | -2.63884 | 0.01972 | 455.46266 | 0.33541 |
| 832 | 3394.39167 | 11.66538 | 7609.60761  | 459.78696 | 1.25873  | 0.08222 | 383.69840 | 0.63292 |
| 833 | 4450.75372 | 19.81162 | 8020.56821  | 406.65258 | 5.51116  | 0.07569 | 465.46240 | 0.59610 |
| 834 | 4195.48379 | 21.01381 | 10535.01542 | 632.96308 | 2.19901  | 0.03361 | 623.28440 | 0.55182 |
| 835 | 3532.55061 | 15.25251 | 11894.55577 | 452.61392 | 0.33318  | 0.07086 | 410.24105 | 0.56180 |
| 836 | 4773.91563 | 10.16372 | 11787.02582 | 546.15809 | -0.05107 | 0.01413 | 741.88974 | 0.12230 |
| 837 | 4010.05690 | 9.29830  | 8972.42926  | 299.30432 | -2.94697 | 0.00656 | 354.72029 | 0.23525 |
| 838 | 4878.90332 | 9.30131  | 9216.83379  | 70.95660  | 0.36001  | 0.00327 | 33.70904  | 0.70009 |
| 839 | 4412.18165 | 17.90625 | 7001.77740  | 710.34748 | 2.76950  | 0.03300 | 759.60311 | 0.46203 |
| 840 | 4952.10350 | 10.75613 | 10157.43082 | 138.95498 | 1.19312  | 0.00320 | 171.67235 | 0.25247 |
| 841 | 3134.76242 | 18.15689 | 10144.06535 | 295.18797 | 4.00110  | 0.18942 | 153.31717 | 0.84721 |
| 842 | 4958.24202 | 6.64175  | 10859.82968 | 254.78398 | -3.38761 | 0.00592 | 339.12417 | 0.20080 |
| 843 | 3389.57367 | 17.96278 | 19461.49849 | 403.27160 | 1.45156  | 0.08270 | 310.04316 | 0.75106 |
| 844 | 3868.86585 | 24.39385 | 6321.02718  | 907.24470 | 4.78236  | 0.01704 | 947.11138 | 0.68796 |
| 845 | 3793.87032 | 24.12423 | 10987.09974 | 692.69706 | 2.73498  | 0.04690 | 705.00226 | 0.83608 |
| 846 | 4490.47343 | 20.49268 | 16577.12038 | 709.94829 | 3.59090  | 0.01371 | 855.99012 | 0.28281 |



|     |            |          |             |            |          |         |            |         |
|-----|------------|----------|-------------|------------|----------|---------|------------|---------|
| 847 | 4875.81588 | 7.73379  | 9578.98695  | 477.94356  | 1.22613  | 0.01227 | 668.08088  | 0.20328 |
| 848 | 4642.59723 | 20.13482 | 9503.26870  | 378.65682  | 4.79641  | 0.04511 | 523.55969  | 0.34564 |
| 849 | 5012.75693 | 6.82915  | 8871.43439  | 296.79455  | -0.75272 | 0.00129 | 451.83487  | 0.03301 |
| 850 | 4872.22598 | 16.81581 | 8554.12378  | 235.45132  | 3.37050  | 0.06475 | 260.30421  | 0.33288 |
| 851 | 4617.39410 | 21.71266 | 15565.85043 | 428.56290  | 5.87463  | 0.08023 | 494.34079  | 0.52284 |
| 852 | 4965.44078 | 9.81978  | 8597.49677  | 403.62312  | -0.19986 | 0.00637 | 577.00642  | 0.13934 |
| 853 | 4950.95791 | 10.72039 | 10098.40918 | 131.87633  | 0.57493  | 0.00296 | 170.75039  | 0.28168 |
| 854 | 3391.83119 | 9.61697  | 6810.15417  | 391.67565  | 0.74583  | 0.05029 | 353.12086  | 0.52744 |
| 855 | 4332.85841 | 21.89781 | 8649.15758  | 721.48227  | 2.25845  | 0.04634 | 743.05730  | 0.53576 |
| 856 | 3733.71596 | 13.16578 | 13684.53093 | 225.38730  | -0.64723 | 0.00504 | 278.65350  | 0.34065 |
| 857 | 5177.93228 | 15.20886 | 9864.34532  | 41.81169   | -1.62243 | 0.00017 | 20.56756   | 1.26201 |
| 858 | 4429.18739 | 14.63206 | 6225.78909  | 622.24761  | 3.21687  | 0.02698 | 689.08322  | 0.33275 |
| 859 | 4441.40202 | 20.39359 | 8263.17537  | 466.31771  | 5.98943  | 0.11001 | 510.77464  | 0.56540 |
| 860 | 3271.16497 | 18.37737 | 10243.70798 | 414.41630  | 2.88351  | 0.18152 | 332.15192  | 0.85627 |
| 861 | 3613.90662 | 12.37436 | 30924.08702 | 267.97297  | 1.02661  | 0.01705 | 277.13023  | 0.44317 |
| 862 | 3576.05055 | 13.36013 | 5151.52030  | 719.92986  | 2.54562  | 0.04076 | 691.79216  | 0.73279 |
| 863 | 3735.84276 | 11.62362 | 8715.72091  | 649.15264  | 0.63781  | 0.03169 | 646.64033  | 0.57598 |
| 864 | 4637.11836 | 16.97174 | 10098.91436 | 329.91363  | 3.30912  | 0.06266 | 447.29511  | 0.54288 |
| 865 | 4779.39285 | 10.39262 | 11644.42610 | 571.41239  | -0.55000 | 0.00981 | 758.06566  | 1.13827 |
| 866 | 3427.64452 | 8.07256  | 13612.72309 | 354.34299  | 1.70310  | 0.03469 | 363.41467  | 0.43191 |
| 867 | 3542.45793 | 17.37223 | 8059.73914  | 363.76194  | 0.07312  | 0.05322 | 345.34062  | 0.57515 |
| 868 | 4696.00899 | 13.66322 | 9901.34811  | 365.28545  | 3.51906  | 0.02079 | 428.90384  | 0.24472 |
| 869 | 3103.18802 | 17.38869 | 16813.62825 | 405.68298  | 3.01186  | 0.19956 | 299.49548  | 0.97293 |
| 870 | 4980.98458 | 17.63888 | 8848.36075  | 699.81514  | 0.55381  | 0.01771 | 927.04435  | 0.28309 |
| 871 | 3575.21219 | 17.68258 | 7356.18328  | 463.98557  | 0.48010  | 0.09289 | 443.24152  | 0.76006 |
| 872 | 4230.65495 | 18.86282 | 6815.47472  | 805.14440  | 2.70662  | 0.04245 | 839.93222  | 0.56588 |
| 873 | 3756.19220 | 12.48830 | 6500.12336  | 376.48298  | -1.16381 | 0.01504 | 414.41143  | 0.41356 |
| 874 | 4241.60132 | 19.14745 | 7227.39063  | 431.70870  | 4.24314  | 0.04807 | 401.24801  | 0.50308 |
| 875 | 2577.75849 | 15.04802 | 10974.21598 | 530.80793  | 5.44094  | 0.27794 | 476.95454  | 0.71663 |
| 876 | 3382.65834 | 24.43414 | 11953.19259 | 553.78750  | 3.12163  | 0.05030 | 468.57808  | 0.65581 |
| 877 | 4513.48405 | 21.20295 | 10024.87060 | 279.51119  | 6.57118  | 0.09073 | 284.69468  | 0.53423 |
| 878 | 4574.78619 | 14.29410 | 21048.28609 | 68.50553   | -4.11228 | 0.00005 | 33.00330   | 1.02029 |
| 879 | 4374.22778 | 20.36554 | 9974.43376  | 609.99402  | 1.62726  | 0.03778 | 691.75228  | 0.42669 |
| 880 | 4430.48193 | 20.11689 | 8105.59348  | 532.39483  | 5.75106  | 0.13358 | 568.14687  | 0.59905 |
| 881 | 4215.53031 | 15.25798 | 13316.79694 | 96.87737   | 0.34257  | 0.00135 | 84.99745   | 1.03126 |
| 882 | 5003.07180 | 7.78286  | 15194.39921 | 144.16461  | -0.96444 | 0.00221 | 189.01686  | 0.06359 |
| 883 | 3964.46475 | 20.03696 | 9214.84790  | 777.85755  | 6.65515  | 0.05804 | 666.00267  | 0.70792 |
| 884 | 4779.28539 | 10.37834 | 11757.67006 | 472.70675  | -0.46559 | 0.00868 | 643.39646  | 0.12918 |
| 885 | 4663.71572 | 16.47917 | 16566.86088 | 422.33837  | 4.27446  | 0.10128 | 573.55198  | 0.43793 |
| 886 | 3216.41711 | 14.48759 | 10034.73396 | 275.61290  | 2.80086  | 0.09396 | 240.68255  | 0.35492 |
| 887 | 3903.20499 | 24.71780 | 10044.45427 | 1095.30000 | 4.98746  | 0.01093 | 1017.79101 | 0.35580 |
| 888 | 4572.80709 | 7.59464  | 8655.54414  | 337.89687  | -2.44953 | 0.00455 | 482.59995  | 0.10190 |
| 889 | 3740.26492 | 12.93934 | 13740.92629 | 142.23028  | -1.06475 | 0.00358 | 148.90852  | 0.23496 |
| 890 | 4408.42011 | 17.84080 | 7010.16622  | 673.89891  | 3.10499  | 0.04197 | 709.82999  | 0.41942 |
| 891 | 4237.92081 | 19.25202 | 7210.65729  | 645.79316  | 2.82745  | 0.05052 | 731.42648  | 0.44215 |
| 892 | 4669.07431 | 20.15091 | 8191.32727  | 361.21241  | 5.01436  | 0.04777 | 490.55110  | 0.30014 |
| 893 | 4911.71775 | 12.72791 | 7781.49116  | 330.70973  | 2.65737  | 0.03350 | 438.45249  | 0.31471 |
| 894 | 4804.82842 | 22.30068 | 10788.51599 | 522.99564  | 2.63011  | 0.01367 | 685.40777  | 0.26901 |
| 895 | 4944.59137 | 13.12953 | 9376.16093  | 398.76450  | 2.84903  | 0.01012 | 602.60233  | 0.19752 |
| 896 | 4244.45166 | 17.30819 | 7629.20226  | 618.84668  | -0.42167 | 0.02093 | 691.63469  | 0.52816 |
| 897 | 3754.95907 | 12.41335 | 6492.71508  | 313.53011  | -1.51798 | 0.01540 | 344.27349  | 0.33211 |
| 898 | 4525.19712 | 20.93969 | 11825.37733 | 606.92177  | 3.81776  | 0.01330 | 767.58028  | 0.26859 |
| 899 | 4760.33173 | 21.58707 | 19535.75760 | 513.03016  | 5.41499  | 0.03726 | 666.86040  | 0.27570 |
| 900 | 4502.15612 | 16.66486 | 8869.35212  | 461.39984  | 1.45806  | 0.04176 | 523.99870  | 0.42310 |
| 901 | 2980.79943 | 16.72160 | 16792.37122 | 393.09904  | 4.23530  | 0.24083 | 323.64501  | 0.99324 |
| 902 | 4688.94465 | 13.75808 | 9710.03271  | 429.80688  | 2.32435  | 0.02171 | 536.57818  | 0.21999 |
| 903 | 4687.46511 | 21.35703 | 17792.60478 | 589.82032  | 5.44980  | 0.07474 | 741.89211  | 0.58069 |
| 904 | 4737.72583 | 15.91295 | 12175.45736 | 532.82872  | 4.04030  | 0.05002 | 734.50191  | 0.42788 |
| 905 | 3766.93456 | 11.92816 | 9280.58884  | 596.54329  | 1.63629  | 0.03107 | 557.17554  | 0.55469 |
| 906 | 4926.03297 | 7.63155  | 9083.08082  | 392.01320  | -3.04772 | 0.00043 | 586.10188  | 0.03099 |
| 907 | 3146.91944 | 19.32040 | 8037.43028  | 563.86871  | 2.85982  | 0.14978 | 447.86750  | 1.92471 |
| 908 | 4505.83276 | 16.69523 | 8851.30902  | 484.79254  | 0.92233  | 0.03265 | 575.99262  | 0.35369 |
| 909 | 4371.50835 | 20.41865 | 9919.75186  | 555.16844  | 2.20355  | 0.04306 | 646.32266  | 0.46146 |
| 910 | 4646.90769 | 20.88052 | 8749.07070  | 509.93752  | 7.11553  | 0.09454 | 632.76914  | 0.56627 |
| 911 | 4536.95999 | 20.23893 | 20368.46856 | 480.68914  | 5.70196  | 0.11176 | 614.53596  | 0.44580 |
| 912 | 3680.47759 | 7.67969  | 5906.46984  | 494.20608  | 0.29169  | 0.02525 | 499.21170  | 0.52921 |
| 913 | 5003.06096 | 7.78072  | 13757.03038 | 214.81624  | -0.76790 | 0.00202 | 323.65582  | 0.08929 |
| 914 | 4719.12969 | 19.30003 | 9886.70788  | 536.94851  | 1.89622  | 0.04174 | 685.46962  | 0.28710 |
| 915 | 4097.43376 | 21.14068 | 14694.11162 | 77.15190   | 2.41568  | 0.00880 | 31.72305   | 0.70770 |
| 916 | 3650.71854 | 23.38277 | 12860.22394 | 80.31258   | 3.43639  | 0.00712 | 31.79713   | 1.07021 |
| 917 | 4196.60237 | 21.00522 | 10537.57809 | 723.35055  | 2.94470  | 0.03504 | 733.52658  | 0.50795 |

|     |            |          |             |           |          |         |           |         |
|-----|------------|----------|-------------|-----------|----------|---------|-----------|---------|
| 918 | 4408.27322 | 22.74100 | 8372.75249  | 609.15511 | 3.90868  | 0.01422 | 833.76553 | 0.29134 |
| 919 | 4851.87667 | 13.67091 | 11918.80318 | 484.11248 | 1.34502  | 0.03790 | 630.91603 | 0.39297 |
| 920 | 3931.72071 | 10.46829 | 12829.76204 | 157.11753 | -1.74082 | 0.00515 | 144.35353 | 0.31493 |
| 921 | 4198.27123 | 21.04126 | 10545.17842 | 544.63141 | 2.04245  | 0.03251 | 522.66705 | 0.52012 |
| 922 | 3452.81177 | 18.58554 | 19492.73733 | 409.60872 | 1.01899  | 0.08127 | 345.33232 | 0.80444 |
| 923 | 4894.40812 | 9.48426  | 10013.68956 | 475.73935 | -0.43838 | 0.02530 | 611.45953 | 0.36394 |
| 924 | 4726.43755 | 19.34391 | 9876.64232  | 682.25651 | 0.17026  | 0.04367 | 875.96290 | 0.25333 |
| 925 | 4605.91198 | 18.86343 | 8414.39079  | 375.74337 | 4.72229  | 0.03292 | 484.70348 | 0.30610 |
| 926 | 3555.25705 | 17.47145 | 7352.91394  | 508.79205 | 1.17717  | 0.12486 | 500.16530 | 0.91216 |
| 927 | 4296.09684 | 14.38684 | 14163.87049 | 99.47389  | 1.05041  | 0.00135 | 80.81773  | 1.20067 |
| 928 | 4957.84432 | 9.91590  | 8201.15737  | 272.56693 | 0.72198  | 0.00449 | 404.16978 | 0.20193 |
| 929 | 3484.13154 | 18.85192 | 18792.02322 | 400.49766 | -0.18566 | 0.05104 | 334.59270 | 1.71535 |
| 930 | 4836.29299 | 14.49226 | 10651.87078 | 401.36323 | 3.78822  | 0.03444 | 605.11641 | 0.19179 |
| 931 | 3736.28280 | 11.53416 | 8787.77224  | 525.40803 | -0.86546 | 0.03179 | 501.63054 | 0.60675 |
| 932 | 4415.84789 | 17.86561 | 7179.47172  | 574.91544 | 2.14736  | 0.05141 | 666.67080 | 0.45530 |
| 933 | 2855.98284 | 15.33131 | 14850.20814 | 437.06064 | 3.76523  | 0.23419 | 392.02431 | 0.64218 |
| 934 | 4874.06481 | 16.82812 | 8563.14810  | 339.70040 | 4.10806  | 0.04571 | 450.00518 | 0.41335 |
| 935 | 3679.97071 | 7.66772  | 5917.37222  | 501.65884 | 0.77234  | 0.02521 | 530.63270 | 0.52920 |
| 936 | 3915.47648 | 12.93747 | 12081.66611 | 359.23601 | 0.31721  | 0.03409 | 417.58974 | 0.46033 |
| 937 | 3392.04445 | 9.60716  | 6802.20069  | 341.59598 | 2.19112  | 0.05155 | 320.39539 | 0.52509 |
| 938 | 3702.96483 | 25.48623 | 8121.06337  | 101.94188 | 3.57161  | 0.00694 | 54.89093  | 1.11104 |
| 939 | 4147.62642 | 16.39957 | 8932.36332  | 789.20093 | 1.89380  | 0.02714 | 868.37041 | 0.47029 |
| 940 | 5010.08288 | 6.80591  | 10456.04347 | 219.90450 | -2.86341 | 0.00091 | 318.20987 | 0.03918 |
| 941 | 4687.08500 | 18.25468 | 16650.50986 | 376.92004 | 3.53510  | 0.02980 | 501.82589 | 0.15938 |
| 942 | 4441.28529 | 21.73118 | 7909.17906  | 536.56554 | 2.02724  | 0.02935 | 679.96001 | 0.30366 |
| 943 | 3755.71455 | 12.41906 | 6498.49135  | 350.72405 | -1.58470 | 0.01540 | 381.31779 | 0.33220 |
| 944 | 4770.04825 | 14.73001 | 11942.61317 | 451.19516 | 3.45345  | 0.02109 | 646.50047 | 0.40232 |
| 945 | 4576.09400 | 10.38929 | 9311.83195  | 496.48639 | -2.30114 | 0.02495 | 626.99374 | 0.18507 |
| 946 | 4086.04726 | 18.93305 | 6727.01386  | 849.15289 | 3.23548  | 0.06420 | 849.26748 | 0.62554 |
| 947 | 4785.02838 | 22.27391 | 10678.22093 | 435.25624 | 3.78777  | 0.05168 | 542.65157 | 0.51143 |
| 948 | 4768.23216 | 8.12361  | 9410.67677  | 252.38534 | -2.98038 | 0.00350 | 338.82991 | 0.09057 |
| 949 | 3379.01706 | 9.65496  | 6899.75947  | 403.42638 | 2.09571  | 0.05913 | 425.05883 | 0.54940 |
| 950 | 4627.52746 | 22.27023 | 9828.05388  | 463.81595 | 1.34140  | 0.03874 | 581.38320 | 0.40362 |
| 951 | 3911.41884 | 13.55402 | 11166.27710 | 314.52947 | -1.09883 | 0.03022 | 310.47535 | 0.50066 |
| 952 | 4419.36267 | 17.90863 | 7193.46100  | 499.56132 | 2.10286  | 0.03713 | 584.01587 | 0.34567 |
| 953 | 4706.22368 | 11.09199 | 15916.52529 | 130.14862 | 1.83554  | 0.00511 | 165.21712 | 0.22910 |
| 954 | 3892.94097 | 24.36083 | 6979.79953  | 53.32781  | 1.40277  | 0.00450 | 19.70874  | 0.96964 |
| 955 | 4199.21651 | 21.02516 | 10551.77340 | 733.13906 | 1.70497  | 0.03283 | 790.33674 | 0.53087 |
| 956 | 3195.74209 | 20.22136 | 10227.75640 | 639.61325 | 4.44754  | 0.14213 | 519.68061 | 1.21928 |
| 957 | 3703.44839 | 7.83459  | 6092.63394  | 344.66573 | -2.53660 | 0.02080 | 340.07280 | 0.50657 |
| 958 | 4843.42328 | 12.53932 | 13064.21963 | 410.14430 | 2.77985  | 0.02205 | 573.58145 | 0.31309 |
| 959 | 4182.38676 | 12.32016 | 12528.02005 | 227.06040 | -2.23082 | 0.00479 | 279.13491 | 0.22190 |
| 960 | 4806.37659 | 22.30990 | 10806.26489 | 616.94981 | 1.56592  | 0.01433 | 808.11364 | 0.18496 |
| 961 | 3541.90846 | 17.32607 | 8074.05251  | 382.22840 | -0.45817 | 0.03952 | 360.20484 | 0.61992 |
| 962 | 3212.48197 | 19.32916 | 13081.41948 | 357.73120 | 2.86308  | 0.19129 | 240.60172 | 0.72669 |
| 963 | 3575.73593 | 13.28846 | 5287.23127  | 477.58032 | 0.90985  | 0.04590 | 440.87070 | 0.55060 |
| 964 | 4889.73370 | 9.42155  | 12720.97559 | 328.20531 | 2.22009  | 0.01798 | 497.45906 | 0.25513 |
| 965 | 4449.24322 | 20.46093 | 16214.50457 | 780.30804 | 2.83736  | 0.01636 | 983.49250 | 0.24810 |
| 966 | 3379.95156 | 20.14663 | 10273.52137 | 195.33361 | 4.89005  | 0.01658 | 202.61423 | 1.09347 |
| 967 | 4793.31278 | 15.81803 | 7410.47550  | 513.34584 | 2.68112  | 0.01452 | 744.69032 | 0.20511 |
| 968 | 4281.36939 | 14.21123 | 6834.67961  | 523.52179 | -0.10949 | 0.02516 | 618.89191 | 0.27222 |
| 969 | 4646.19340 | 22.37295 | 9649.53527  | 518.24204 | 3.33214  | 0.03670 | 660.33982 | 0.50382 |
| 970 | 4297.79563 | 15.21687 | 12153.98982 | 513.03361 | -1.57768 | 0.01992 | 615.81949 | 0.30074 |
| 971 | 3929.81771 | 18.61828 | 7258.82800  | 827.34879 | 5.82337  | 0.05644 | 772.09922 | 0.62855 |
| 972 | 4570.58032 | 17.91435 | 8314.20544  | 609.76429 | 2.70412  | 0.02625 | 798.00458 | 0.31396 |
| 973 | 4627.07192 | 15.30550 | 10137.46870 | 426.33243 | 4.93639  | 0.10119 | 584.34246 | 0.46817 |
| 974 | 4710.56031 | 11.11715 | 15926.57657 | 87.03326  | 2.29279  | 0.00468 | 75.18667  | 0.25751 |
| 975 | 4552.34210 | 17.76734 | 8332.70941  | 573.19769 | 2.42016  | 0.02699 | 748.48447 | 0.30738 |
| 976 | 2929.70130 | 24.88260 | 7019.69267  | 499.76651 | 6.52614  | 0.15522 | 299.04496 | 0.93438 |
| 977 | 4309.94105 | 21.90301 | 8555.51144  | 653.50433 | 1.67514  | 0.03294 | 702.19449 | 0.56635 |
| 978 | 3975.89910 | 22.94469 | 7896.71748  | 714.22382 | 2.74644  | 0.03535 | 742.40991 | 0.50698 |
| 979 | 3181.36218 | 16.47476 | 7081.49753  | 386.94521 | 2.52898  | 0.12075 | 288.07642 | 0.65928 |
| 980 | 3226.60027 | 19.71010 | 18047.60579 | 387.27504 | 2.13502  | 0.15362 | 329.40256 | 0.77602 |
| 981 | 4513.43033 | 14.19740 | 21056.00834 | 73.51842  | -2.66710 | 0.00030 | 42.48836  | 0.75656 |
| 982 | 4675.04260 | 18.89518 | 12411.04781 | 477.79424 | 5.59546  | 0.04630 | 597.94706 | 0.38194 |
| 983 | 5028.71199 | 18.38075 | 9225.34332  | 431.61912 | 5.15599  | 0.01888 | 624.81686 | 0.17974 |
| 984 | 3130.04496 | 15.54098 | 6696.54563  | 367.36481 | 2.06508  | 0.01386 | 335.81025 | 0.19975 |
| 985 | 2454.86918 | 13.94127 | 3974.63067  | 394.12766 | 6.49732  | 0.29691 | 403.77191 | 0.55453 |
| 986 | 4968.48780 | 9.88118  | 8896.94905  | 331.74100 | 0.90445  | 0.00823 | 472.59513 | 0.13813 |
| 987 | 3417.15429 | 19.20796 | 19574.58255 | 398.81163 | 1.27861  | 0.11107 | 321.97297 | 0.74451 |
| 988 | 4448.94138 | 19.76896 | 7946.39265  | 550.94408 | 6.28995  | 0.10634 | 659.84343 | 0.58544 |

|      |            |          |             |            |          |         |            |         |
|------|------------|----------|-------------|------------|----------|---------|------------|---------|
| 989  | 5044.97452 | 13.48629 | 8943.89493  | 236.87942  | 1.33120  | 0.01307 | 333.07611  | 0.20055 |
| 990  | 3504.21682 | 9.30524  | 8019.16890  | 432.47718  | 0.47882  | 0.03817 | 370.96612  | 0.45164 |
| 991  | 3137.39360 | 13.69705 | 8591.84902  | 530.40885  | 4.37458  | 0.31368 | 445.32899  | 0.74794 |
| 992  | 2966.62673 | 16.98430 | 15451.17140 | 389.33869  | 3.50996  | 0.13994 | 386.91692  | 0.82874 |
| 993  | 3387.31655 | 20.37025 | 9999.84400  | 94.52603   | 4.55531  | 0.01760 | 54.36524   | 0.99968 |
| 994  | 2938.82449 | 26.33817 | 12775.65051 | 714.98120  | 5.09253  | 0.11368 | 480.63166  | 1.62655 |
| 995  | 4399.20556 | 6.56002  | 7880.56464  | 392.60613  | -0.24768 | 0.00383 | 527.99273  | 0.06831 |
| 996  | 4750.71308 | 14.78332 | 9660.20033  | 298.96901  | 2.97672  | 0.05504 | 397.72972  | 0.58546 |
| 997  | 4423.66537 | 11.43477 | 8383.24446  | 523.79397  | -3.45741 | 0.01103 | 647.81624  | 0.29740 |
| 998  | 4504.63801 | 16.53120 | 9004.63907  | 499.15988  | -1.10830 | 0.02806 | 582.98630  | 0.43429 |
| 999  | 4645.02269 | 22.39097 | 9715.71154  | 642.79479  | 2.98661  | 0.04058 | 805.83270  | 0.45064 |
| 1000 | 4843.69232 | 15.29480 | 9746.82167  | 353.04444  | 1.95569  | 0.02489 | 512.95605  | 0.30971 |
| 1001 | 4836.89828 | 8.90567  | 9435.88463  | 112.41713  | -0.52848 | 0.00383 | 108.42601  | 0.70873 |
| 1002 | 4608.19877 | 18.87998 | 7974.92296  | 379.37746  | 4.72357  | 0.03766 | 475.60999  | 0.26382 |
| 1003 | 4285.22457 | 15.10398 | 12213.18856 | 561.52011  | 0.88602  | 0.02611 | 665.44179  | 0.33010 |
| 1004 | 4974.27609 | 10.26548 | 8950.67010  | 270.20211  | 1.57307  | 0.00454 | 404.87411  | 0.12693 |
| 1005 | 4663.65537 | 19.54591 | 12893.62325 | 336.00383  | 4.85409  | 0.08761 | 427.29627  | 0.44273 |
| 1006 | 3770.61413 | 9.61008  | 8316.94220  | 432.44004  | 0.95308  | 0.04984 | 411.58089  | 0.47758 |
| 1007 | 4765.89695 | 8.11734  | 9269.90671  | 364.87282  | -0.12587 | 0.00401 | 510.89905  | 0.10015 |
| 1008 | 3629.74171 | 23.26185 | 5159.43778  | 545.98559  | 8.73922  | 0.08685 | 520.83250  | 0.42707 |
| 1009 | 3832.77294 | 20.20660 | 6293.25454  | 835.13925  | 3.21394  | 0.02928 | 818.19109  | 0.45483 |
| 1010 | 4425.71174 | 11.53678 | 8415.42151  | 645.92266  | -0.81509 | 0.01268 | 777.16216  | 0.21012 |
| 1011 | 3843.63547 | 24.39214 | 6296.20109  | 783.11914  | 3.87764  | 0.01736 | 738.19495  | 0.90431 |
| 1012 | 3217.27586 | 16.53218 | 12204.97491 | 387.93461  | 2.52517  | 0.08519 | 312.55480  | 0.73925 |
| 1013 | 4958.77476 | 6.66987  | 9714.48539  | 368.89524  | 1.23247  | 0.00856 | 539.10081  | 0.18689 |
| 1014 | 3693.93567 | 24.59004 | 6211.28297  | 618.36332  | 2.82115  | 0.03436 | 570.15228  | 0.45724 |
| 1015 | 3226.95125 | 19.56914 | 13181.65857 | 390.88065  | 2.03247  | 0.16377 | 315.09824  | 0.94648 |
| 1016 | 4790.26588 | 10.24633 | 11154.81333 | 537.54848  | 1.03153  | 0.02672 | 687.00525  | 0.41853 |
| 1017 | 4616.19033 | 7.79842  | 16757.81089 | 139.15145  | -2.41890 | 0.00003 | 187.75007  | 0.08468 |
| 1018 | 4849.38240 | 15.82370 | 8859.42858  | 381.23496  | 3.63560  | 0.02857 | 570.84559  | 0.26563 |
| 1019 | 3535.37920 | 17.20810 | 8008.46302  | 395.77489  | -0.45457 | 0.06825 | 409.09148  | 0.53438 |
| 1020 | 4873.27533 | 7.68390  | 9870.00349  | 415.86744  | -0.60381 | 0.00832 | 583.00893  | 0.21927 |
| 1021 | 4615.32294 | 18.64206 | 8334.34752  | 505.94646  | 4.94789  | 0.03615 | 656.96698  | 0.36664 |
| 1022 | 3756.80758 | 12.50632 | 6501.58974  | 344.16697  | -1.67130 | 0.01466 | 376.92649  | 0.41359 |
| 1023 | 3726.11574 | 25.54892 | 8014.06377  | 106.16599  | 4.52644  | 0.00678 | 58.04571   | 1.12745 |
| 1024 | 4365.07984 | 18.83068 | 9572.48136  | 465.15485  | 4.06435  | 0.05511 | 493.61102  | 0.32281 |
| 1025 | 4680.01750 | 20.16837 | 7837.56921  | 374.85007  | 6.08963  | 0.04705 | 521.96668  | 0.24193 |
| 1026 | 4615.75687 | 22.41378 | 8667.62845  | 696.90654  | 2.11216  | 0.04122 | 869.18095  | 0.39250 |
| 1027 | 4334.30252 | 18.29782 | 6873.43372  | 585.79648  | 3.65842  | 0.03120 | 611.35492  | 0.50938 |
| 1028 | 4898.98861 | 16.87002 | 8796.23735  | 383.93718  | 3.01700  | 0.04657 | 495.32896  | 0.42281 |
| 1029 | 4690.00560 | 13.76987 | 9854.24062  | 416.46144  | 2.53628  | 0.02064 | 511.14348  | 0.24178 |
| 1030 | 3371.87490 | 20.30299 | 10618.47486 | 233.50411  | 3.64538  | 0.02078 | 264.03990  | 0.95367 |
| 1031 | 4637.51115 | 16.97688 | 10124.57336 | 337.35335  | 3.43107  | 0.06292 | 459.63334  | 0.53108 |
| 1032 | 4662.00568 | 18.75497 | 12226.63498 | 541.53836  | 4.84769  | 0.04661 | 665.48964  | 0.39802 |
| 1033 | 3162.50098 | 24.94252 | 7781.86805  | 477.51090  | 5.17597  | 0.12972 | 262.46089  | 1.13806 |
| 1034 | 3241.68585 | 18.15610 | 18247.42674 | 476.99480  | 2.51126  | 0.20232 | 409.95207  | 1.12921 |
| 1035 | 4767.13383 | 14.80265 | 9583.24246  | 391.95449  | 5.84924  | 0.02771 | 571.63859  | 0.33349 |
| 1036 | 4805.81946 | 22.30730 | 10791.64560 | 608.87035  | 3.05103  | 0.01390 | 789.27355  | 0.17667 |
| 1037 | 5023.82756 | 18.27914 | 10083.23499 | 460.15307  | 2.81946  | 0.01883 | 657.35911  | 0.17657 |
| 1038 | 4661.14830 | 16.54251 | 17790.03588 | 403.08476  | 3.62916  | 0.08294 | 555.79090  | 0.42948 |
| 1039 | 4453.15829 | 19.87060 | 8010.46163  | 280.83944  | 4.76850  | 0.08076 | 273.99196  | 0.59469 |
| 1040 | 4881.72891 | 19.78044 | 11067.29945 | 454.01868  | 3.08967  | 0.07500 | 624.99280  | 0.36653 |
| 1041 | 4749.39340 | 15.99999 | 20817.69423 | 302.22511  | 3.41220  | 0.05186 | 396.54830  | 0.65030 |
| 1042 | 4791.75622 | 15.73496 | 7292.75694  | 407.75183  | 3.78603  | 0.01334 | 610.63129  | 0.21815 |
| 1043 | 4496.97830 | 12.63279 | 9338.88951  | 580.16523  | -0.61834 | 0.02391 | 721.17950  | 0.25467 |
| 1044 | 3974.56245 | 24.27162 | 12068.98756 | 62.43369   | 3.26210  | 0.00938 | 13.91740   | 1.29757 |
| 1045 | 3656.50877 | 23.86265 | 10507.51645 | 1404.47269 | 8.92968  | 0.06907 | 1156.49514 | 1.00151 |
| 1046 | 4058.34858 | 9.06410  | 11619.79632 | 190.32120  | -1.33858 | 0.00585 | 239.44493  | 0.13991 |
| 1047 | 3803.37045 | 23.70153 | 12142.40781 | 770.92442  | 5.84893  | 0.02447 | 823.86204  | 0.05173 |
| 1048 | 4666.52336 | 20.15325 | 8169.95851  | 406.74709  | 4.32276  | 0.04455 | 586.47104  | 0.23921 |
| 1049 | 5045.02490 | 13.48534 | 8837.89905  | 377.03605  | 2.06456  | 0.01348 | 557.42918  | 0.20221 |
| 1050 | 2967.35045 | 16.85701 | 15387.22493 | 370.23307  | 3.40839  | 0.23897 | 292.40421  | 0.72471 |
| 1051 | 3429.38078 | 8.10330  | 13701.71662 | 244.16866  | 0.90975  | 0.03397 | 236.08659  | 0.37307 |
| 1052 | 4642.35166 | 22.37657 | 9712.94377  | 665.07294  | 2.66381  | 0.04185 | 834.08058  | 0.46362 |
| 1053 | 3499.06999 | 9.25727  | 7966.12785  | 424.34678  | 1.58962  | 0.03934 | 344.29829  | 0.74108 |
| 1054 | 3800.92432 | 24.10625 | 11065.50433 | 628.08010  | 3.48491  | 0.03899 | 573.33898  | 0.82259 |
| 1055 | 4961.53674 | 8.63638  | 9572.36803  | 210.55381  | -0.48119 | 0.00328 | 287.26663  | 0.16594 |
| 1056 | 3799.23685 | 24.11392 | 11034.57497 | 593.97558  | 3.16206  | 0.04156 | 520.33637  | 0.74025 |
| 1057 | 3925.01511 | 20.03589 | 9509.89346  | 823.92201  | 5.37830  | 0.05267 | 734.39139  | 0.59945 |
| 1058 | 4968.53205 | 8.60815  | 9392.15442  | 272.17860  | -0.04286 | 0.00288 | 392.58359  | 0.16627 |
| 1059 | 4691.57173 | 15.38489 | 14131.93158 | 424.38219  | 4.39699  | 0.06400 | 607.24545  | 0.34927 |

|      |            |          |             |           |          |         |           |         |
|------|------------|----------|-------------|-----------|----------|---------|-----------|---------|
| 1060 | 4630.37370 | 7.68186  | 16246.18659 | 117.32348 | -1.50311 | 0.00003 | 133.37399 | 0.06997 |
| 1061 | 4423.26903 | 11.48164 | 8362.25379  | 541.41665 | 0.51212  | 0.01417 | 662.93994 | 0.16582 |
| 1062 | 4620.19076 | 7.86494  | 16258.81878 | 137.99642 | -1.55839 | 0.00005 | 180.87597 | 0.08072 |
| 1063 | 4299.28557 | 15.21357 | 12129.56075 | 576.52237 | -1.69795 | 0.01735 | 694.84083 | 0.31702 |
| 1064 | 4615.20895 | 21.68452 | 15540.39316 | 553.21919 | 4.54103  | 0.05945 | 661.51102 | 0.53343 |
| 1065 | 4575.98915 | 10.39686 | 9309.38099  | 455.79238 | -1.91061 | 0.02156 | 550.01780 | 0.18431 |
| 1066 | 3593.02301 | 17.08084 | 17965.95482 | 394.63913 | 1.12263  | 0.08606 | 349.00081 | 0.71686 |
| 1067 | 4782.28626 | 16.50797 | 9773.25019  | 441.57689 | -0.79153 | 0.03001 | 576.20731 | 0.37976 |
| 1068 | 3383.17783 | 24.42422 | 11978.31528 | 502.18533 | 2.83657  | 0.05112 | 395.49902 | 0.65713 |
| 1069 | 4266.92540 | 16.20715 | 7782.50964  | 790.91097 | 1.48460  | 0.04564 | 859.09498 | 0.46323 |
| 1070 | 4498.18709 | 21.28453 | 8976.07241  | 542.67754 | 4.93896  | 0.08031 | 616.86203 | 0.61256 |
| 1071 | 3133.63296 | 15.99468 | 9554.47601  | 458.85655 | 2.82174  | 0.18558 | 374.79100 | 0.67444 |
| 1072 | 3599.26109 | 13.02197 | 20116.11871 | 234.47107 | 1.33443  | 0.01750 | 257.85153 | 0.29455 |
| 1073 | 5010.18863 | 10.11838 | 8319.01334  | 335.93480 | 4.10550  | 0.00635 | 493.56434 | 0.13278 |
| 1074 | 4246.49231 | 19.01759 | 7267.21540  | 567.57343 | 3.42056  | 0.04438 | 611.18134 | 0.46267 |
| 1075 | 4423.58693 | 11.44009 | 8405.12877  | 593.79422 | -1.44772 | 0.01049 | 730.13075 | 0.28091 |
| 1076 | 4174.32878 | 18.99718 | 8224.98076  | 812.80540 | 2.18354  | 0.03803 | 827.13331 | 0.50480 |
| 1077 | 4129.84758 | 12.94629 | 12604.95604 | 328.55205 | -0.40731 | 0.00661 | 443.95716 | 0.15053 |
| 1078 | 4892.90531 | 9.54018  | 8032.88841  | 128.96146 | 2.09193  | 0.00531 | 147.15773 | 0.23096 |
| 1079 | 4264.01574 | 23.23353 | 13456.99700 | 816.74379 | 3.57985  | 0.00981 | 952.60064 | 0.12107 |
| 1080 | 3306.67900 | 14.63971 | 11481.90609 | 385.55871 | 1.58048  | 0.05710 | 371.83365 | 0.60835 |
| 1081 | 4637.34563 | 16.97363 | 10126.40380 | 419.63034 | 3.84837  | 0.06128 | 581.90874 | 0.50965 |
| 1082 | 4976.18044 | 7.10291  | 9006.92207  | 208.99247 | -4.56417 | 0.00024 | 284.61571 | 0.03525 |
| 1083 | 3743.81563 | 13.01634 | 13546.34368 | 137.04770 | -1.07495 | 0.00328 | 121.76977 | 0.29458 |
| 1084 | 4767.27504 | 18.35280 | 10675.35750 | 721.48526 | 0.67013  | 0.03743 | 932.27322 | 0.36024 |
| 1085 | 3786.04572 | 19.91702 | 9519.80428  | 460.72187 | -0.52427 | 0.03271 | 431.02178 | 1.24755 |
| 1086 | 4745.35539 | 21.83912 | 10228.20712 | 532.71870 | 4.37745  | 0.06601 | 664.35958 | 0.46757 |
| 1087 | 4570.75160 | 22.55593 | 13128.58088 | 632.68875 | 4.50448  | 0.02548 | 803.03378 | 0.38914 |
| 1088 | 3235.42054 | 19.69922 | 13375.96180 | 489.42315 | 2.23151  | 0.17401 | 446.38042 | 0.89829 |
| 1089 | 3388.07854 | 9.53887  | 6802.92785  | 413.33296 | 1.78704  | 0.05036 | 381.26170 | 0.51498 |
| 1090 | 4744.40408 | 16.20435 | 20861.43581 | 304.22703 | 2.59010  | 0.05728 | 399.26626 | 0.65859 |
| 1091 | 2906.37028 | 16.53332 | 14891.43875 | 456.09036 | 3.78916  | 0.20240 | 420.10495 | 0.69948 |
| 1092 | 4756.54369 | 8.34065  | 9973.11498  | 331.66207 | -4.13535 | 0.00300 | 459.36240 | 0.10883 |
| 1093 | 3379.54185 | 9.63260  | 6938.99807  | 392.36319 | 2.42057  | 0.06008 | 384.46594 | 0.53383 |
| 1094 | 3379.30734 | 20.34952 | 10214.79338 | 152.32068 | 4.59723  | 0.02007 | 133.22734 | 0.95301 |
| 1095 | 4691.62915 | 18.28403 | 16582.83116 | 434.46027 | 4.75114  | 0.03431 | 604.51778 | 0.12867 |
| 1096 | 4367.39155 | 18.79758 | 9614.51939  | 535.48576 | 2.72104  | 0.04062 | 611.27430 | 0.34198 |
| 1097 | 3159.26427 | 15.90424 | 6817.83200  | 232.48199 | 0.68562  | 0.01142 | 159.06723 | 0.31452 |
| 1098 | 4341.64722 | 18.73323 | 7815.96132  | 336.52062 | 6.78833  | 0.11290 | 384.26455 | 0.49208 |
| 1099 | 3137.22212 | 16.79654 | 9536.34198  | 458.80838 | 2.53402  | 0.19008 | 362.05484 | 0.66095 |
| 1100 | 4709.15679 | 19.22825 | 11506.95574 | 302.51033 | 3.20580  | 0.08483 | 381.57428 | 0.58069 |
| 1101 | 3431.37488 | 8.14053  | 12977.10564 | 364.43848 | 2.64416  | 0.03941 | 352.34216 | 0.46823 |
| 1102 | 4758.68404 | 21.57499 | 19591.88453 | 549.24109 | 3.69716  | 0.03682 | 694.75571 | 0.33011 |
| 1103 | 4488.44660 | 20.73516 | 9785.36732  | 503.11973 | 4.86668  | 0.10860 | 603.20248 | 0.53462 |
| 1104 | 4767.62164 | 14.72519 | 11879.92415 | 517.15458 | 3.31840  | 0.02150 | 734.44005 | 0.39480 |
| 1105 | 3130.94559 | 15.60305 | 6667.51087  | 305.64732 | 1.77944  | 0.01031 | 246.21018 | 0.23334 |
| 1106 | 4572.82110 | 8.23984  | 8630.26687  | 277.62973 | -3.78808 | 0.00650 | 365.10557 | 0.19798 |
| 1107 | 4511.08972 | 20.82860 | 11690.75168 | 599.81451 | 5.59762  | 0.01832 | 728.36126 | 0.31238 |
| 1108 | 4571.51538 | 22.51134 | 12884.06366 | 511.20407 | 6.00998  | 0.03392 | 637.96035 | 0.35436 |
| 1109 | 4688.50245 | 15.34411 | 14153.91082 | 558.06339 | 3.51430  | 0.06350 | 786.15420 | 0.34634 |
| 1110 | 4687.24507 | 21.34927 | 17482.60986 | 444.12367 | 3.89011  | 0.06971 | 550.44457 | 0.58180 |
| 1111 | 2546.00166 | 15.38710 | 3756.72309  | 349.99106 | 4.92026  | 0.23065 | 421.66729 | 1.80292 |
| 1112 | 3784.40822 | 19.93887 | 9541.48768  | 435.06474 | -0.54939 | 0.03458 | 392.33127 | 1.20797 |
| 1113 | 4423.05813 | 11.47544 | 8360.22249  | 531.59731 | -1.27006 | 0.01386 | 639.53614 | 0.16253 |
| 1114 | 4784.60231 | 15.47648 | 7009.46343  | 324.82750 | 2.74760  | 0.01325 | 469.21719 | 0.24043 |
| 1115 | 3981.50457 | 22.98019 | 7930.36429  | 735.60997 | 2.35230  | 0.03520 | 779.37242 | 0.50626 |
| 1116 | 4977.32427 | 17.62534 | 8727.57140  | 688.01422 | 2.45392  | 0.02622 | 882.80398 | 0.31014 |
| 1117 | 5019.84509 | 13.79593 | 8463.27020  | 371.36734 | 1.36745  | 0.01597 | 547.47736 | 0.19736 |
| 1118 | 4372.95667 | 20.44985 | 9934.24199  | 488.57579 | 3.58468  | 0.04230 | 507.26598 | 0.49455 |
| 1119 | 4875.56085 | 7.72335  | 9752.52462  | 311.71387 | 0.90534  | 0.00974 | 420.47300 | 0.23825 |
| 1120 | 3272.01469 | 18.14833 | 9903.35992  | 368.35494 | 2.16417  | 0.12975 | 274.36642 | 0.86877 |
| 1121 | 4003.24368 | 9.35871  | 8714.23188  | 255.41086 | -3.41060 | 0.00670 | 280.37283 | 0.24346 |
| 1122 | 4787.74783 | 16.65089 | 9854.05351  | 688.27218 | 0.98214  | 0.03981 | 885.23661 | 0.35428 |
| 1123 | 4535.54524 | 20.24447 | 20327.01865 | 377.01875 | 6.27620  | 0.11119 | 482.79686 | 0.41345 |
| 1124 | 3381.28610 | 7.63414  | 13547.67032 | 259.23635 | 0.92779  | 0.03080 | 196.04919 | 0.57405 |
| 1125 | 4849.81248 | 14.70594 | 10704.59596 | 360.25593 | 5.03557  | 0.03476 | 536.24611 | 0.19537 |
| 1126 | 3245.05253 | 18.23601 | 18194.46242 | 510.37686 | 2.95675  | 0.21246 | 421.07425 | 1.16386 |
| 1127 | 3766.80080 | 11.90835 | 9274.08339  | 612.40151 | 1.96444  | 0.02992 | 619.77385 | 0.64575 |
| 1128 | 3577.36485 | 13.36761 | 5214.73580  | 684.18731 | 1.52484  | 0.04088 | 663.25241 | 0.55973 |
| 1129 | 4675.91014 | 10.78385 | 16610.38913 | 109.75142 | 2.00364  | 0.00825 | 112.75151 | 0.46663 |
| 1130 | 3860.89405 | 23.84752 | 7244.18321  | 955.08156 | 6.00799  | 0.06043 | 999.06126 | 0.44794 |

|      |            |          |             |           |          |         |           |         |
|------|------------|----------|-------------|-----------|----------|---------|-----------|---------|
| 1131 | 4947.36860 | 7.22317  | 9313.73724  | 299.63163 | -4.57138 | 0.00028 | 436.38248 | 0.03190 |
| 1132 | 3626.16249 | 13.42841 | 29916.10433 | 169.46578 | 0.98831  | 0.01414 | 197.48199 | 0.24680 |
| 1133 | 4576.12619 | 10.22078 | 9305.25955  | 398.92615 | -3.76862 | 0.01975 | 506.06559 | 0.36631 |
| 1134 | 4464.04760 | 20.32727 | 13549.13818 | 480.54481 | 6.25833  | 0.08852 | 571.70890 | 0.34572 |
| 1135 | 4699.14961 | 15.43596 | 14242.67394 | 406.72223 | 5.45114  | 0.06772 | 573.95342 | 0.27365 |
| 1136 | 2546.52558 | 15.04118 | 3619.94356  | 414.12715 | 5.77546  | 0.27186 | 369.86832 | 1.85551 |
| 1137 | 4515.60556 | 20.91031 | 11712.62989 | 552.12236 | 4.21978  | 0.01477 | 674.05818 | 0.23553 |
| 1138 | 4569.07889 | 22.51286 | 12918.39725 | 519.58018 | 4.10487  | 0.02386 | 671.74536 | 0.36256 |
| 1139 | 4521.33025 | 19.91867 | 7353.27986  | 581.73524 | 1.34707  | 0.05035 | 721.77592 | 0.44576 |
| 1140 | 4913.65301 | 13.67879 | 8095.44474  | 445.72297 | 2.98970  | 0.01501 | 665.76755 | 0.20720 |
| 1141 | 5114.15781 | 10.45758 | 9594.92505  | 72.05066  | -2.32185 | 0.00071 | 60.93273  | 0.59605 |
| 1142 | 3801.51832 | 23.71207 | 12150.93931 | 769.27708 | 6.41296  | 0.02027 | 785.33777 | 0.05295 |
| 1143 | 4417.12870 | 17.81930 | 7200.23206  | 421.93934 | 1.20382  | 0.03056 | 478.86557 | 0.43722 |
| 1144 | 4574.81730 | 17.92261 | 8318.63391  | 474.89811 | 1.87994  | 0.02757 | 635.81337 | 0.31155 |
| 1145 | 4417.77776 | 15.53789 | 25083.30740 | 84.01979  | -2.32347 | 0.00044 | 64.28433  | 0.35870 |
| 1146 | 3693.06360 | 14.09309 | 10418.67883 | 387.96502 | -0.23315 | 0.05283 | 350.82323 | 0.68523 |
| 1147 | 2599.27848 | 26.32274 | 11428.00919 | 562.28524 | 7.64644  | 0.17907 | 230.18080 | 1.39525 |
| 1148 | 2915.16708 | 20.07018 | 8030.32922  | 667.50997 | 5.20162  | 0.27972 | 514.16769 | 1.00483 |
| 1149 | 2980.03812 | 17.03250 | 15789.64801 | 607.70566 | 4.03898  | 0.21270 | 401.54390 | 0.82745 |
| 1150 | 3572.37361 | 11.90758 | 20221.15986 | 201.47621 | 0.02019  | 0.02423 | 191.88909 | 0.52552 |
| 1151 | 4293.64264 | 15.02947 | 12165.38129 | 462.05949 | -2.78113 | 0.01716 | 549.64356 | 0.37311 |
| 1152 | 3736.27518 | 13.15794 | 13696.84922 | 209.94416 | -0.13878 | 0.00508 | 255.98716 | 0.25254 |
| 1153 | 4571.96698 | 22.55846 | 13120.78929 | 518.95201 | 5.84886  | 0.02351 | 649.64960 | 0.42490 |
| 1154 | 2927.46110 | 25.00492 | 6915.77807  | 577.75394 | 5.86470  | 0.15424 | 291.37102 | 0.92972 |
| 1155 | 4687.16587 | 18.22762 | 16601.74759 | 430.27499 | 3.96416  | 0.02941 | 587.44431 | 0.15008 |
| 1156 | 4691.02124 | 13.69474 | 9870.26304  | 408.39563 | 4.74576  | 0.02119 | 484.66818 | 0.24690 |
| 1157 | 4513.83558 | 19.81892 | 7357.56759  | 595.69730 | 0.99658  | 0.04672 | 722.70851 | 0.44870 |
| 1158 | 3770.55807 | 9.63686  | 8367.17829  | 458.77063 | 0.77233  | 0.04812 | 403.25100 | 0.57703 |
| 1159 | 4635.44458 | 20.74125 | 9149.16804  | 607.06737 | 3.94577  | 0.07671 | 738.56596 | 0.50464 |
| 1160 | 3824.24122 | 23.81315 | 12146.64780 | 808.64394 | 6.70965  | 0.01789 | 890.19474 | 0.06353 |
| 1161 | 3333.21760 | 24.28943 | 11549.24969 | 631.28441 | 4.42750  | 0.06286 | 565.01785 | 0.70409 |
| 1162 | 4604.95458 | 20.65304 | 21021.70499 | 390.04342 | 5.04597  | 0.07607 | 499.66150 | 0.48587 |
| 1163 | 4469.57081 | 20.41327 | 13577.91660 | 400.19725 | 6.22742  | 0.07792 | 453.61338 | 0.47593 |
| 1164 | 3133.93021 | 19.88458 | 10609.44348 | 454.62644 | 3.34015  | 0.13596 | 296.81039 | 1.23640 |
| 1165 | 3573.99521 | 23.31165 | 9344.07832  | 933.32359 | 7.38709  | 0.07272 | 712.87061 | 1.28162 |
| 1166 | 4977.78661 | 23.10821 | 10216.54724 | 310.14857 | 1.59946  | 0.04531 | 303.94698 | 0.79304 |
| 1167 | 4421.00582 | 17.92624 | 7198.38209  | 576.23137 | 1.16157  | 0.03098 | 690.70551 | 0.32170 |
| 1168 | 4835.20979 | 14.46606 | 10636.66377 | 433.34077 | 2.40371  | 0.02934 | 654.96193 | 0.23645 |
| 1169 | 3861.31922 | 24.40467 | 6376.71665  | 848.53805 | 2.59247  | 0.01830 | 809.18338 | 0.67498 |
| 1170 | 3488.86520 | 13.84015 | 7418.65430  | 508.85344 | 1.65586  | 0.05844 | 466.79738 | 0.60867 |
| 1171 | 4932.97309 | 7.59514  | 9905.26406  | 321.20424 | -4.79860 | 0.00030 | 484.36020 | 0.03209 |
| 1172 | 2539.66587 | 16.15319 | 3557.15133  | 396.81629 | 5.20178  | 0.30541 | 398.22661 | 1.98971 |
| 1173 | 3839.05439 | 23.93617 | 7119.40306  | 755.04184 | 7.24955  | 0.07215 | 795.20271 | 0.43311 |
| 1174 | 4156.60230 | 19.49103 | 14926.33083 | 65.67982  | 2.02673  | 0.00957 | 22.89400  | 0.70229 |
| 1175 | 3681.83350 | 7.70757  | 5920.18696  | 425.63403 | -0.61191 | 0.02479 | 445.05622 | 0.51960 |
| 1176 | 4179.29622 | 12.92310 | 12901.41075 | 166.66078 | -1.08320 | 0.00507 | 205.72165 | 0.12043 |
| 1177 | 4605.98770 | 18.90914 | 8416.25803  | 463.17974 | 4.22420  | 0.04050 | 614.54156 | 0.32001 |
| 1178 | 3783.36836 | 19.05979 | 12554.97622 | 370.25517 | -1.95556 | 0.06882 | 314.46387 | 0.74240 |
| 1179 | 3844.28996 | 24.40684 | 6301.84879  | 947.58755 | 3.32390  | 0.01672 | 930.52133 | 0.87888 |
| 1180 | 4349.48618 | 21.91030 | 8710.35402  | 892.22445 | 3.18699  | 0.04352 | 917.01259 | 0.54464 |
| 1181 | 4128.77908 | 12.84780 | 12713.67095 | 311.82643 | -0.38875 | 0.01027 | 416.77967 | 0.23439 |
| 1182 | 4556.56115 | 22.53062 | 12750.84626 | 539.98038 | 3.87840  | 0.02788 | 666.36255 | 0.38627 |
| 1183 | 3811.95064 | 13.69999 | 18216.75989 | 190.20147 | -0.18969 | 0.00483 | 214.05520 | 0.56255 |
| 1184 | 3893.87727 | 13.40852 | 11279.44697 | 378.44416 | -0.21968 | 0.03415 | 392.06513 | 0.37162 |
| 1185 | 4568.82227 | 22.56639 | 12957.76592 | 623.73152 | 4.94015  | 0.02583 | 769.23594 | 0.39413 |
| 1186 | 4507.51155 | 16.68412 | 8504.32586  | 548.09626 | -0.03741 | 0.03630 | 641.28285 | 0.43448 |
| 1187 | 4099.61035 | 20.17185 | 14881.32141 | 97.41969  | 2.51559  | 0.01282 | 61.17510  | 0.68223 |
| 1188 | 3130.59057 | 18.12267 | 10239.87505 | 475.78370 | 4.35494  | 0.19118 | 451.85117 | 0.87753 |
| 1189 | 4380.83244 | 18.74455 | 8620.67164  | 703.81792 | 2.01712  | 0.03598 | 773.81074 | 0.37084 |
| 1190 | 4611.74318 | 7.79881  | 16770.67595 | 143.99390 | -2.98089 | 0.00003 | 183.37016 | 0.07371 |
| 1191 | 3131.64267 | 19.06726 | 10068.32365 | 594.02397 | 2.23707  | 0.17747 | 490.34860 | 1.72133 |
| 1192 | 4401.91668 | 6.54535  | 8146.17201  | 365.99999 | -2.55850 | 0.00255 | 490.36339 | 0.11062 |
| 1193 | 4658.26311 | 19.51663 | 12326.24390 | 418.94417 | 3.73525  | 0.08993 | 564.19673 | 0.43851 |
| 1194 | 4767.30678 | 8.13069  | 9556.40069  | 362.13666 | -3.43040 | 0.00303 | 512.03119 | 0.08165 |
| 1195 | 3829.99751 | 23.84226 | 12156.58360 | 717.79952 | 6.16247  | 0.01864 | 753.25885 | 0.06547 |
| 1196 | 4480.23734 | 20.67666 | 9705.24109  | 513.32807 | 5.29349  | 0.10518 | 604.82197 | 0.53933 |
| 1197 | 5009.01872 | 10.08967 | 9274.09369  | 327.40201 | 1.22315  | 0.00522 | 491.65275 | 0.14743 |
| 1198 | 4380.39411 | 18.87026 | 8599.04948  | 645.90385 | 2.34031  | 0.03799 | 728.15982 | 0.36932 |
| 1199 | 4178.42447 | 18.97942 | 8265.44478  | 724.81525 | 1.32006  | 0.03081 | 783.56585 | 0.57022 |
| 1200 | 5009.74792 | 6.80217  | 11476.84787 | 258.64620 | -3.40025 | 0.00114 | 382.33425 | 0.03886 |
| 1201 | 3716.98896 | 25.43673 | 7668.17548  | 86.12508  | 3.90408  | 0.00646 | 41.26575  | 1.12000 |

|      |            |          |             |            |          |         |            |         |
|------|------------|----------|-------------|------------|----------|---------|------------|---------|
| 1202 | 4338.87019 | 19.40906 | 6383.96734  | 515.34666  | 2.00306  | 0.04379 | 545.35220  | 0.54358 |
| 1203 | 4547.29364 | 20.96319 | 15709.35263 | 646.01703  | 4.08554  | 0.01227 | 783.15760  | 0.26560 |
| 1204 | 4367.15356 | 18.87090 | 9566.12611  | 431.26033  | 3.55720  | 0.04642 | 425.47765  | 0.39852 |
| 1205 | 3977.51203 | 22.95643 | 7911.10522  | 884.29818  | 2.32553  | 0.04479 | 873.71339  | 0.51054 |
| 1206 | 4965.74493 | 9.83136  | 8603.10189  | 401.03619  | 0.51575  | 0.00675 | 572.96173  | 0.14933 |
| 1207 | 4079.37192 | 21.86853 | 8908.25856  | 545.49666  | 2.06279  | 0.02857 | 518.82194  | 0.49300 |
| 1208 | 4575.57536 | 10.40424 | 9309.56931  | 562.87104  | -1.50835 | 0.02481 | 713.02783  | 0.19143 |
| 1209 | 4958.56417 | 6.67223  | 10827.98619 | 310.41690  | -3.89326 | 0.00651 | 429.21826  | 0.21407 |
| 1210 | 4713.24749 | 15.86750 | 11380.14857 | 524.96128  | 4.63958  | 0.05581 | 678.29194  | 0.39151 |
| 1211 | 4918.19965 | 10.82790 | 8778.95394  | 177.55856  | 2.68156  | 0.00673 | 246.13386  | 0.09183 |
| 1212 | 4795.78505 | 10.39538 | 11118.95618 | 488.56533  | 1.53085  | 0.03071 | 617.40830  | 0.43321 |
| 1213 | 4497.31217 | 21.28935 | 8796.07358  | 331.94182  | 4.17573  | 0.08179 | 316.89114  | 0.55770 |
| 1214 | 4758.65188 | 14.77376 | 11458.41094 | 380.43098  | 3.33564  | 0.02392 | 548.26314  | 0.33357 |
| 1215 | 4281.63757 | 14.16438 | 6882.10284  | 538.50451  | -2.22422 | 0.02013 | 615.01898  | 0.47707 |
| 1216 | 5009.07092 | 10.09196 | 9269.15807  | 291.08164  | 1.78256  | 0.00512 | 428.08596  | 0.14952 |
| 1217 | 4604.69118 | 22.17402 | 10971.01304 | 414.59104  | 5.18297  | 0.06887 | 481.77790  | 0.59463 |
| 1218 | 4415.66595 | 17.86003 | 7180.49061  | 560.87981  | 1.59789  | 0.04245 | 678.40593  | 0.40771 |
| 1219 | 4240.38948 | 17.39748 | 7578.22669  | 607.66218  | 0.39218  | 0.02291 | 641.71599  | 0.47542 |
| 1220 | 4093.40865 | 25.71899 | 6847.15329  | 51.26555   | 3.00518  | 0.00156 | 11.05195   | 2.12342 |
| 1221 | 4890.19304 | 9.34473  | 10178.22757 | 515.34471  | -0.95107 | 0.02053 | 672.32437  | 0.33021 |
| 1222 | 4134.93964 | 12.89031 | 12669.25977 | 299.62393  | -0.39770 | 0.00609 | 408.95815  | 0.13008 |
| 1223 | 4974.57566 | 11.04396 | 10235.59381 | 82.15030   | 0.54887  | 0.00258 | 64.98404   | 0.33492 |
| 1224 | 5003.00038 | 7.77976  | 15195.13474 | 147.22752  | -0.69855 | 0.00206 | 203.33744  | 0.06277 |
| 1225 | 3735.67516 | 11.59050 | 8724.11379  | 592.45225  | 1.12876  | 0.03053 | 588.91034  | 0.61793 |
| 1226 | 3192.30460 | 15.88575 | 12369.44218 | 337.22318  | 3.62323  | 0.10336 | 234.76645  | 0.76067 |
| 1227 | 4799.38876 | 16.85042 | 9918.05584  | 611.61161  | 0.79915  | 0.03234 | 794.92074  | 0.39170 |
| 1228 | 4475.68780 | 21.01924 | 9267.43760  | 458.90837  | 3.20679  | 0.04657 | 603.15248  | 0.39063 |
| 1229 | 3767.34976 | 9.57412  | 8330.19208  | 524.13211  | 1.32668  | 0.06352 | 478.33533  | 0.52381 |
| 1230 | 3573.49941 | 23.29104 | 9348.82207  | 1414.63189 | 8.89777  | 0.07264 | 1066.63126 | 1.29027 |
| 1231 | 4875.92727 | 7.73616  | 9580.86341  | 431.91110  | 2.41951  | 0.01275 | 584.66658  | 0.19902 |
| 1232 | 3767.23386 | 11.92547 | 9266.41795  | 740.03632  | 2.86213  | 0.03400 | 752.73583  | 0.60744 |
| 1233 | 3841.61134 | 20.22626 | 6350.99097  | 716.87155  | 2.03991  | 0.02383 | 740.25241  | 0.52140 |
| 1234 | 4147.01121 | 16.43436 | 8952.52159  | 745.42423  | 0.26780  | 0.02230 | 832.10548  | 0.38858 |
| 1235 | 4948.00380 | 7.25332  | 9816.12276  | 294.23475  | -4.00355 | 0.00027 | 425.27644  | 0.03460 |
| 1236 | 4281.82572 | 17.72489 | 7494.06617  | 680.23893  | 2.84295  | 0.04040 | 698.90187  | 0.50648 |
| 1237 | 3182.08344 | 20.12132 | 10280.99962 | 542.31346  | 4.23740  | 0.14710 | 400.57014  | 1.20638 |
| 1238 | 3736.15875 | 11.52092 | 8789.24792  | 458.08917  | -0.47235 | 0.03001 | 423.53013  | 0.61151 |
| 1239 | 4568.58269 | 20.63120 | 17908.63819 | 489.78043  | 3.75495  | 0.09420 | 629.39743  | 0.48169 |
| 1240 | 4070.44149 | 19.98306 | 14831.71752 | 96.44497   | 2.62924  | 0.01268 | 64.23795   | 0.57241 |
| 1241 | 4399.84774 | 6.57995  | 7895.86632  | 363.39690  | -1.24122 | 0.00371 | 497.11838  | 0.06615 |
| 1242 | 4249.79526 | 19.07171 | 7255.31373  | 450.75791  | 5.08693  | 0.05586 | 438.06406  | 0.39996 |
| 1243 | 3538.67869 | 9.37530  | 7261.64082  | 699.62704  | 2.23022  | 0.04248 | 660.60489  | 0.69651 |
| 1244 | 2443.57474 | 13.70398 | 3739.08657  | 439.39315  | 6.33470  | 0.24035 | 409.36742  | 1.11977 |
| 1245 | 4453.27876 | 20.16133 | 13496.63711 | 318.64495  | 6.07779  | 0.10224 | 335.52273  | 0.34214 |
| 1246 | 3510.12137 | 15.35213 | 11653.37308 | 478.83106  | 1.49850  | 0.08767 | 440.34474  | 0.44100 |
| 1247 | 3331.81144 | 24.27920 | 11537.64359 | 621.59945  | 3.68271  | 0.05757 | 512.12273  | 0.67195 |
| 1248 | 2576.40854 | 14.99357 | 10780.19673 | 440.03418  | 5.64824  | 0.28629 | 357.40125  | 0.76600 |
| 1249 | 3860.68273 | 23.99020 | 12289.75925 | 730.79782  | 4.96000  | 0.01737 | 702.62541  | 0.07389 |
| 1250 | 4202.56324 | 20.99672 | 10551.76334 | 772.89600  | 2.43787  | 0.04203 | 767.04914  | 0.52321 |
| 1251 | 4788.89388 | 15.68897 | 7272.18433  | 384.05553  | 2.79992  | 0.01411 | 550.94722  | 0.19391 |
| 1252 | 3681.64872 | 7.68637  | 5923.30655  | 374.92488  | -1.18528 | 0.02697 | 371.81606  | 0.46991 |
| 1253 | 4974.28036 | 10.26441 | 8950.56481  | 302.17762  | 1.54586  | 0.00441 | 451.62889  | 0.12962 |
| 1254 | 4685.18695 | 13.57086 | 9626.13549  | 477.62994  | 2.82905  | 0.02127 | 587.72190  | 0.24319 |
| 1255 | 3190.27958 | 16.65662 | 7058.72984  | 407.60592  | 1.97446  | 0.10060 | 346.64716  | 0.64216 |
| 1256 | 4147.32432 | 16.44298 | 8968.12239  | 707.45773  | -0.13582 | 0.02116 | 759.15901  | 0.38334 |
| 1257 | 4899.75537 | 16.87928 | 8792.00355  | 271.04749  | 1.95277  | 0.04498 | 322.11214  | 0.42888 |
| 1258 | 3162.34485 | 15.81832 | 12021.68077 | 447.77397  | 3.05530  | 0.11037 | 367.16691  | 0.64418 |
| 1259 | 4747.57014 | 15.99473 | 20940.31087 | 413.71053  | 4.05077  | 0.06086 | 565.25228  | 0.64680 |
| 1260 | 3523.45643 | 16.71222 | 16908.69560 | 455.22959  | 1.86681  | 0.16358 | 397.62726  | 0.85778 |
| 1261 | 4470.42029 | 20.41401 | 13716.32985 | 561.15581  | 5.47687  | 0.10611 | 689.06493  | 0.45699 |
| 1262 | 4281.57038 | 14.16877 | 6881.23689  | 559.51763  | -2.97170 | 0.02059 | 643.53653  | 0.48560 |
| 1263 | 4813.13671 | 20.77378 | 7728.35390  | 664.06780  | 3.01360  | 0.05042 | 838.57765  | 0.39011 |
| 1264 | 4411.59278 | 22.72700 | 8355.65705  | 631.56943  | 2.06899  | 0.01512 | 813.97026  | 0.29786 |
| 1265 | 4374.21969 | 20.45865 | 9920.99099  | 490.01911  | 3.08837  | 0.04297 | 505.34171  | 0.46764 |
| 1266 | 5008.84981 | 10.08858 | 9263.37822  | 279.59677  | 1.22132  | 0.00489 | 409.56317  | 0.15545 |
| 1267 | 3132.59534 | 15.59976 | 6661.69346  | 305.09216  | 2.40385  | 0.01543 | 199.57897  | 0.24463 |
| 1268 | 4606.83996 | 14.60636 | 20012.40317 | 58.15620   | -4.98416 | 0.00001 | 19.37909   | 1.20566 |
| 1269 | 2935.73198 | 20.27781 | 8082.53546  | 485.01826  | 4.05409  | 0.25245 | 375.29065  | 1.07664 |
| 1270 | 4836.14236 | 14.47951 | 10644.74205 | 398.89610  | 2.99541  | 0.02973 | 599.54641  | 0.23743 |
| 1271 | 4236.70879 | 24.72204 | 8288.10929  | 699.32422  | 1.61488  | 0.01927 | 796.86696  | 0.37373 |
| 1272 | 3607.05979 | 13.19774 | 24923.43385 | 263.46964  | 0.66657  | 0.01586 | 324.25417  | 0.28491 |

|      |            |          |             |           |          |         |           |         |
|------|------------|----------|-------------|-----------|----------|---------|-----------|---------|
| 1273 | 3786.04572 | 19.91702 | 9519.80428  | 499.47744 | -0.80153 | 0.03260 | 474.13597 | 1.23165 |
| 1274 | 4897.00628 | 9.56718  | 10169.06254 | 489.30781 | 0.57677  | 0.02951 | 630.78254 | 0.37741 |
| 1275 | 4605.87846 | 22.28261 | 8631.79920  | 593.63003 | 2.42808  | 0.03978 | 733.01884 | 0.39405 |
| 1276 | 4178.58628 | 18.97983 | 8260.14712  | 725.70978 | 1.97064  | 0.03239 | 787.93913 | 0.54169 |
| 1277 | 4708.99826 | 19.22915 | 11504.56203 | 366.72473 | 4.28603  | 0.08347 | 478.27353 | 0.56906 |
| 1278 | 4417.21491 | 17.81488 | 7202.01612  | 459.24614 | 0.29044  | 0.03089 | 527.34731 | 0.45506 |
| 1279 | 4759.97139 | 8.18780  | 9986.53552  | 318.55405 | -3.37486 | 0.00270 | 444.95764 | 0.07791 |
| 1280 | 3369.35067 | 20.17830 | 10493.36956 | 183.35841 | 3.00428  | 0.01222 | 184.59677 | 1.05981 |
| 1281 | 4849.44723 | 15.81925 | 8860.77909  | 361.51651 | 2.91538  | 0.02882 | 542.04380 | 0.26516 |
| 1282 | 4793.94158 | 10.33908 | 11103.35045 | 479.92100 | 1.43385  | 0.03063 | 628.74023 | 0.46532 |
| 1283 | 4501.55885 | 16.64554 | 8476.12754  | 582.27182 | 1.10171  | 0.04314 | 677.54954 | 0.42804 |
| 1284 | 5002.98239 | 7.77990  | 15195.13100 | 194.73409 | -0.72766 | 0.00207 | 287.99439 | 0.07640 |
| 1285 | 3742.45880 | 11.76179 | 7588.43636  | 649.66199 | 2.72997  | 0.02462 | 580.97065 | 0.55744 |
| 1286 | 2909.67752 | 16.54448 | 14941.27873 | 416.85519 | 4.24284  | 0.19801 | 421.25556 | 0.74978 |
| 1287 | 3754.35625 | 12.24196 | 6491.91027  | 386.90860 | -2.42450 | 0.01451 | 426.30995 | 0.39129 |
| 1288 | 3696.05209 | 14.23616 | 10445.64715 | 419.08896 | -0.18254 | 0.05350 | 395.40849 | 0.64660 |
| 1289 | 4508.04040 | 22.69135 | 7687.30318  | 548.17003 | 5.50036  | 0.14245 | 619.57458 | 0.81885 |
| 1290 | 4611.55807 | 18.88540 | 7944.56135  | 427.42834 | 5.53980  | 0.03839 | 557.55277 | 0.25271 |
| 1291 | 4941.46534 | 13.05514 | 9396.10343  | 404.41801 | 2.24373  | 0.01031 | 613.16760 | 0.13852 |
| 1292 | 4875.62320 | 7.72457  | 9754.96779  | 404.00500 | 1.19049  | 0.00996 | 569.38347 | 0.23699 |
| 1293 | 3847.37366 | 24.38431 | 6297.70895  | 770.61069 | 4.33553  | 0.01590 | 742.33227 | 0.67930 |
| 1294 | 4401.78849 | 6.54150  | 8154.42588  | 344.93877 | -3.15960 | 0.00280 | 460.91346 | 0.10638 |
| 1295 | 3754.68607 | 12.38271 | 6489.68393  | 364.36770 | -1.56217 | 0.01414 | 395.86184 | 0.41548 |
| 1296 | 4686.83239 | 13.72602 | 9793.83429  | 425.68478 | 2.48254  | 0.01993 | 511.90758 | 0.22425 |
| 1297 | 3488.36010 | 13.82669 | 7417.48396  | 513.09579 | 2.01477  | 0.05801 | 465.70637 | 0.61915 |
| 1298 | 3766.65013 | 11.91399 | 9281.39032  | 640.61322 | 1.52972  | 0.02972 | 664.01831 | 0.48942 |
| 1299 | 4400.97537 | 15.44042 | 24602.00638 | 102.85718 | -1.16664 | 0.00073 | 88.02366  | 0.28626 |
| 1300 | 4737.92857 | 21.69264 | 10151.03875 | 481.70832 | 3.64351  | 0.07474 | 604.95537 | 0.48835 |
| 1301 | 4642.09421 | 15.43264 | 10112.49711 | 294.82491 | 4.31342  | 0.09941 | 401.82571 | 0.43142 |
| 1302 | 4743.37643 | 14.76577 | 9395.05640  | 333.79384 | 2.24498  | 0.05999 | 453.39648 | 0.60880 |
| 1303 | 4675.17429 | 18.85720 | 12279.39075 | 593.39792 | 4.69798  | 0.04911 | 749.34556 | 0.35876 |
| 1304 | 3434.66308 | 8.14138  | 13754.59255 | 334.86034 | 1.81392  | 0.03294 | 325.09303 | 0.41304 |
| 1305 | 4975.99175 | 17.59486 | 8726.36331  | 706.01574 | 1.33704  | 0.02532 | 913.95788 | 0.30559 |
| 1306 | 4710.64889 | 15.80439 | 11092.87351 | 449.01354 | 3.82454  | 0.05784 | 599.89345 | 0.29981 |
| 1307 | 4497.10154 | 16.59088 | 8472.89162  | 585.11381 | 1.98907  | 0.04765 | 672.40478 | 0.35425 |
| 1308 | 4030.30996 | 9.52261  | 11970.35195 | 181.35837 | -1.97312 | 0.00357 | 203.51092 | 0.21490 |
| 1309 | 4490.24217 | 21.05333 | 9254.33133  | 479.23312 | 3.07273  | 0.04202 | 619.80225 | 0.40691 |
| 1310 | 3769.52519 | 9.63445  | 8365.31789  | 532.32477 | 0.09135  | 0.05690 | 532.68307 | 0.57552 |
| 1311 | 3882.26255 | 23.96374 | 12173.64197 | 546.55608 | 7.28826  | 0.01907 | 581.75993 | 0.06364 |
| 1312 | 4984.14545 | 7.17492  | 14177.62906 | 130.95832 | -1.03559 | 0.00147 | 165.02885 | 0.13533 |
| 1313 | 4173.66749 | 18.99951 | 8213.72743  | 692.78224 | 2.44909  | 0.03724 | 733.87978 | 0.45193 |
| 1314 | 4521.62185 | 20.90425 | 15177.34070 | 466.06766 | 4.72642  | 0.01585 | 532.48195 | 0.24514 |
| 1315 | 4885.89627 | 9.34357  | 12593.28301 | 270.18555 | 2.30289  | 0.02156 | 396.66287 | 0.21816 |
| 1316 | 4689.72459 | 15.36192 | 14142.83081 | 380.32854 | 4.08918  | 0.06226 | 531.53915 | 0.34860 |
| 1317 | 4240.71388 | 17.39404 | 7579.04717  | 749.02761 | 0.17014  | 0.02431 | 816.36017 | 0.45448 |
| 1318 | 3916.45460 | 18.54804 | 6907.61420  | 681.83185 | 6.04059  | 0.05696 | 607.71988 | 0.64191 |
| 1319 | 3099.73349 | 19.67243 | 10629.44294 | 514.92866 | 4.05877  | 0.13307 | 342.73220 | 1.24025 |
| 1320 | 4941.20748 | 13.04958 | 9534.98664  | 412.43789 | 0.39536  | 0.00974 | 612.18331 | 0.17804 |
| 1321 | 3695.00292 | 24.59241 | 6205.59287  | 561.01358 | 2.54149  | 0.03998 | 482.65636 | 0.48556 |
| 1322 | 4875.67314 | 7.72719  | 9862.17133  | 211.06256 | 0.54513  | 0.01159 | 247.57769 | 0.20213 |
| 1323 | 4416.89602 | 6.40589  | 7173.89884  | 371.05779 | -3.74404 | 0.00232 | 487.82299 | 0.21083 |
| 1324 | 4178.52792 | 18.98172 | 8263.33521  | 524.61081 | 1.26815  | 0.03266 | 538.63837 | 0.56593 |
| 1325 | 3669.93388 | 14.10236 | 9927.34808  | 564.53705 | 2.16750  | 0.08072 | 592.59492 | 0.62021 |
| 1326 | 4848.76092 | 12.82315 | 13375.16991 | 393.11006 | 4.57278  | 0.02559 | 547.32806 | 0.20943 |
| 1327 | 3163.82961 | 16.83234 | 9587.04117  | 580.55651 | 3.30100  | 0.23146 | 485.93350 | 0.69801 |
| 1328 | 3193.39114 | 16.69991 | 7060.59176  | 337.06031 | 1.73141  | 0.10443 | 280.93782 | 0.63849 |
| 1329 | 5123.52379 | 10.51648 | 10010.18968 | 56.83268  | -3.08960 | 0.00061 | 33.49831  | 0.65048 |
| 1330 | 4230.70519 | 18.86157 | 6823.52669  | 658.86239 | 2.38619  | 0.04485 | 708.07529 | 0.55602 |
| 1331 | 3120.99910 | 18.18280 | 10366.91609 | 372.82914 | 4.06464  | 0.17123 | 290.56411 | 0.78498 |
| 1332 | 3394.86480 | 9.51442  | 6809.40221  | 345.81258 | 1.10376  | 0.04899 | 297.79336 | 0.62246 |
| 1333 | 3248.94050 | 19.86571 | 13388.23587 | 412.35666 | 2.12141  | 0.18073 | 382.31632 | 0.90588 |
| 1334 | 4972.77051 | 8.58584  | 9173.68654  | 309.53277 | -0.21749 | 0.00350 | 460.71065 | 0.10922 |
| 1335 | 4605.06465 | 20.65715 | 22457.67250 | 306.08568 | 4.23421  | 0.08011 | 371.38518 | 0.50275 |
| 1336 | 3534.03071 | 17.39256 | 7920.16670  | 410.99690 | -0.13577 | 0.05820 | 423.31837 | 0.67874 |
| 1337 | 3919.62965 | 20.03872 | 9480.94997  | 809.12458 | 5.32079  | 0.05410 | 736.59852 | 0.61487 |
| 1338 | 4412.16761 | 22.70539 | 8316.37820  | 762.77101 | 3.62151  | 0.01576 | 957.39083 | 0.29577 |
| 1339 | 4419.84376 | 16.94872 | 10245.16541 | 458.71612 | 4.73365  | 0.06907 | 602.83073 | 0.57974 |
| 1340 | 4759.68794 | 8.16912  | 9964.29831  | 337.96913 | -3.64807 | 0.00269 | 476.82591 | 0.07899 |
| 1341 | 4417.33811 | 22.64840 | 8518.11112  | 421.13438 | 4.50949  | 0.01531 | 544.66400 | 0.28795 |
| 1342 | 3627.70972 | 23.25887 | 5167.62496  | 408.95350 | 7.44590  | 0.07533 | 373.66222 | 0.49061 |
| 1343 | 4236.42795 | 23.41148 | 13328.57162 | 803.05261 | 2.79489  | 0.00926 | 919.63481 | 0.14886 |

|      |            |          |             |            |          |         |           |         |
|------|------------|----------|-------------|------------|----------|---------|-----------|---------|
| 1344 | 4782.46191 | 16.54184 | 9810.14549  | 623.95073  | 1.69869  | 0.04703 | 822.70215 | 0.30698 |
| 1345 | 3167.25602 | 15.81078 | 12080.51106 | 387.25279  | 3.80027  | 0.10989 | 305.54605 | 0.64571 |
| 1346 | 4285.38811 | 17.66844 | 7491.29203  | 735.66931  | 3.01647  | 0.04283 | 753.54961 | 0.46389 |
| 1347 | 3187.91274 | 16.75368 | 7005.59778  | 304.73346  | 2.10633  | 0.07742 | 194.42648 | 0.65685 |
| 1348 | 4895.22683 | 12.78922 | 7268.15625  | 359.01348  | 3.72174  | 0.04077 | 475.45298 | 0.31361 |
| 1349 | 4645.51653 | 22.38066 | 9581.09650  | 653.31358  | 2.67341  | 0.04108 | 835.07756 | 0.42537 |
| 1350 | 5024.44598 | 18.27868 | 9249.44453  | 294.68714  | 3.08818  | 0.01739 | 418.97144 | 0.25266 |
| 1351 | 4166.59470 | 23.75348 | 8341.80949  | 873.14902  | 3.22237  | 0.06570 | 890.01047 | 0.57051 |
| 1352 | 4365.04801 | 20.37189 | 9911.44457  | 534.83870  | 3.18513  | 0.05042 | 592.83119 | 0.36304 |
| 1353 | 4843.79252 | 12.54948 | 13044.99876 | 378.35037  | 2.18716  | 0.02274 | 527.61079 | 0.32586 |
| 1354 | 4642.84030 | 20.11078 | 8001.88989  | 390.86436  | 3.91449  | 0.04343 | 540.40211 | 0.33236 |
| 1355 | 4945.31894 | 13.14801 | 9381.96186  | 426.25476  | 2.81308  | 0.01015 | 640.95261 | 0.20047 |
| 1356 | 4299.62119 | 15.22556 | 12130.38087 | 401.66493  | -1.15125 | 0.01855 | 439.78984 | 0.30777 |
| 1357 | 4497.36242 | 21.26915 | 8786.95397  | 509.70313  | 5.39293  | 0.08454 | 573.46116 | 0.61906 |
| 1358 | 3536.65563 | 17.41382 | 7997.12107  | 398.48063  | 0.00819  | 0.05707 | 391.16805 | 0.59587 |
| 1359 | 3272.42681 | 18.13350 | 9899.49734  | 355.12195  | 1.74639  | 0.12894 | 250.24733 | 0.87046 |
| 1360 | 4339.68394 | 18.32475 | 6906.67014  | 529.56701  | 4.87500  | 0.03769 | 523.66618 | 0.45337 |
| 1361 | 3522.58145 | 17.29709 | 7913.88103  | 457.03989  | 1.66120  | 0.06670 | 463.96295 | 0.59524 |
| 1362 | 5113.05792 | 10.96329 | 14444.98557 | 123.31950  | -0.71395 | 0.00230 | 159.06021 | 0.16188 |
| 1363 | 4746.46478 | 21.54262 | 19490.65655 | 427.58719  | 4.30366  | 0.03394 | 537.33463 | 0.37038 |
| 1364 | 3631.77561 | 18.23182 | 19717.55395 | 278.83371  | 0.28596  | 0.05965 | 192.78958 | 0.77590 |
| 1365 | 4794.53792 | 10.36407 | 11104.81859 | 452.80216  | 1.00833  | 0.03258 | 576.75853 | 0.42716 |
| 1366 | 4941.64965 | 13.05839 | 9344.67094  | 348.35054  | 2.38865  | 0.00936 | 518.61017 | 0.18558 |
| 1367 | 3380.20381 | 9.60403  | 6929.84497  | 424.22326  | 3.12243  | 0.07110 | 391.19498 | 0.46348 |
| 1368 | 3072.82024 | 19.48798 | 10712.61077 | 634.20340  | 3.66492  | 0.12691 | 508.41973 | 1.10520 |
| 1369 | 3836.78372 | 23.93399 | 7114.68219  | 743.38848  | 7.11572  | 0.07357 | 743.20579 | 0.33165 |
| 1370 | 5044.70932 | 13.48441 | 8869.37646  | 290.64152  | 0.52393  | 0.01375 | 423.48568 | 0.20763 |
| 1371 | 4319.18352 | 18.30501 | 7718.93852  | 290.58091  | 6.55503  | 0.11095 | 286.46559 | 0.44278 |
| 1372 | 3708.59358 | 24.59489 | 6218.56807  | 726.12908  | 3.23092  | 0.05033 | 683.09698 | 0.47454 |
| 1373 | 4579.31391 | 18.00037 | 8257.44518  | 507.25497  | 1.93409  | 0.02630 | 679.86048 | 0.31979 |
| 1374 | 4573.55225 | 7.61595  | 8644.57815  | 255.66336  | -0.45543 | 0.00480 | 343.50253 | 0.15206 |
| 1375 | 4401.67695 | 6.53800  | 8153.35454  | 367.68667  | -3.06360 | 0.00274 | 486.77295 | 0.14944 |
| 1376 | 3680.55397 | 7.68077  | 5915.74231  | 421.72924  | -0.32047 | 0.02735 | 447.65633 | 0.51969 |
| 1377 | 4367.72077 | 18.87687 | 9569.18609  | 503.11968  | 3.52772  | 0.04553 | 555.28399 | 0.39812 |
| 1378 | 4961.27159 | 9.87320  | 8402.58496  | 188.80617  | 1.13134  | 0.00427 | 260.52655 | 0.19091 |
| 1379 | 4694.76959 | 18.36860 | 16652.95559 | 381.23379  | 3.77715  | 0.02883 | 511.87353 | 0.14848 |
| 1380 | 4763.03893 | 21.57406 | 20163.49815 | 558.47789  | 2.74133  | 0.03495 | 732.30533 | 0.33663 |
| 1381 | 3868.56097 | 24.38704 | 6315.10534  | 749.86630  | 3.58489  | 0.01928 | 693.39842 | 0.73029 |
| 1382 | 3461.42983 | 24.00161 | 11424.31030 | 1053.56281 | 10.05844 | 0.17268 | 748.50199 | 1.86319 |
| 1383 | 4411.67462 | 17.87259 | 7007.56266  | 675.25647  | 2.55856  | 0.03943 | 736.77512 | 0.42076 |
| 1384 | 4958.11112 | 6.63813  | 10779.74262 | 383.12939  | -2.93792 | 0.00585 | 540.21400 | 0.17957 |
| 1385 | 4575.46082 | 7.68697  | 8873.26358  | 273.07472  | -2.96625 | 0.00359 | 374.12241 | 0.09010 |
| 1386 | 3832.97889 | 15.80095 | 8642.46188  | 802.43880  | 2.17394  | 0.03388 | 810.11265 | 0.54239 |
| 1387 | 5009.17303 | 10.09460 | 9283.79340  | 327.83692  | 2.25471  | 0.00596 | 481.71637 | 0.11170 |
| 1388 | 4846.90350 | 13.31333 | 10869.43325 | 321.81344  | 1.81739  | 0.02324 | 480.59912 | 0.29039 |
| 1389 | 2885.53169 | 16.55351 | 14135.79160 | 521.38986  | 4.21000  | 0.23456 | 425.26165 | 0.76394 |
| 1390 | 4448.85405 | 20.39291 | 11002.50524 | 598.39862  | 3.89010  | 0.01715 | 731.92891 | 0.25762 |
| 1391 | 4520.74041 | 19.91542 | 7345.44281  | 611.94753  | 2.57025  | 0.04920 | 725.72903 | 0.44260 |
| 1392 | 4688.28896 | 21.35693 | 17826.57114 | 329.19892  | 3.79073  | 0.07021 | 381.85385 | 0.60943 |
| 1393 | 4266.64057 | 16.21851 | 7787.23397  | 702.09970  | 1.53948  | 0.04299 | 751.07476 | 0.50581 |
| 1394 | 5026.48592 | 18.33424 | 9217.68954  | 484.53364  | 2.36393  | 0.01896 | 703.21640 | 0.17968 |
| 1395 | 3860.50254 | 24.00329 | 12291.85357 | 814.08219  | 5.61957  | 0.01713 | 810.17992 | 0.07039 |
| 1396 | 4080.01278 | 21.85475 | 8920.79393  | 757.49823  | 1.93789  | 0.02899 | 803.17910 | 0.50244 |
| 1397 | 4141.16264 | 12.32437 | 12979.92252 | 129.65570  | -1.92775 | 0.00119 | 146.06558 | 0.58262 |
| 1398 | 2881.72076 | 15.57720 | 15385.21250 | 495.81821  | 4.06054  | 0.21771 | 453.59098 | 0.83517 |
| 1399 | 3700.89195 | 24.57694 | 6198.10494  | 547.83416  | 2.52980  | 0.02923 | 483.25665 | 0.47434 |
| 1400 | 4612.54699 | 18.88458 | 7921.04058  | 429.78214  | 5.73415  | 0.03873 | 557.69578 | 0.25700 |
| 1401 | 3833.74465 | 20.20671 | 6292.20249  | 807.70127  | 2.89736  | 0.02881 | 814.98815 | 0.35315 |
| 1402 | 5023.95666 | 18.26631 | 10070.51482 | 345.00058  | 2.42977  | 0.01791 | 501.73361 | 0.24990 |
| 1403 | 4874.68276 | 16.84879 | 8568.50961  | 424.44132  | 2.79712  | 0.05699 | 564.18502 | 0.41320 |
| 1404 | 4817.40355 | 20.81989 | 7812.78387  | 561.28155  | 5.75075  | 0.06422 | 697.34807 | 0.38927 |
| 1405 | 3522.16006 | 16.76762 | 17013.36405 | 344.18456  | 1.61625  | 0.15658 | 233.76904 | 0.81314 |
| 1406 | 4766.25395 | 8.12226  | 9257.81808  | 364.42063  | -1.48759 | 0.00387 | 525.36548 | 0.09690 |
| 1407 | 4480.43466 | 21.04122 | 9260.80455  | 552.97176  | 3.48555  | 0.04611 | 707.97605 | 0.28254 |
| 1408 | 2853.13789 | 16.50484 | 13685.60127 | 341.43578  | 4.54176  | 0.23134 | 232.26619 | 0.61775 |
| 1409 | 4247.69355 | 23.31599 | 12213.42556 | 643.66049  | 5.90020  | 0.01295 | 765.59950 | 0.12732 |
| 1410 | 4681.90464 | 7.54431  | 17457.10446 | 113.40149  | -3.55791 | 0.00006 | 134.21976 | 0.17226 |
| 1411 | 3163.45756 | 16.89188 | 9587.28203  | 624.84802  | 3.11039  | 0.23040 | 574.22386 | 0.63108 |
| 1412 | 4607.41416 | 18.93331 | 8435.95988  | 489.37982  | 3.92720  | 0.03803 | 640.40365 | 0.31977 |
| 1413 | 4145.82595 | 16.45961 | 8950.22111  | 505.96965  | -0.53925 | 0.01889 | 531.11693 | 0.40110 |
| 1414 | 4246.29407 | 19.01472 | 7265.61666  | 577.86685  | 3.43732  | 0.04367 | 621.41479 | 0.46156 |



|      |            |          |             |            |          |         |           |         |
|------|------------|----------|-------------|------------|----------|---------|-----------|---------|
| 1415 | 3433.18846 | 24.09847 | 11343.31812 | 1216.12966 | 10.48315 | 0.16671 | 890.27713 | 2.00111 |
| 1416 | 3311.99133 | 20.85134 | 14308.43319 | 416.69768  | 1.90281  | 0.18454 | 348.72847 | 1.08503 |
| 1417 | 4549.46856 | 16.02757 | 11318.92902 | 325.15765  | 4.89507  | 0.06532 | 445.42065 | 0.37917 |
| 1418 | 4265.04578 | 23.22787 | 13454.80925 | 626.54190  | 3.89101  | 0.01014 | 809.07315 | 0.12411 |
| 1419 | 2491.36926 | 14.38761 | 3645.23614  | 488.29973  | 5.88425  | 0.32164 | 571.18169 | 0.19210 |
| 1420 | 4824.97842 | 20.85715 | 7792.30688  | 497.80744  | 3.83409  | 0.04768 | 599.31537 | 0.42273 |
| 1421 | 3343.54741 | 24.31093 | 11634.98640 | 527.47605  | 3.24961  | 0.06766 | 460.25471 | 0.49022 |
| 1422 | 4525.76996 | 20.95360 | 15224.77959 | 629.23549  | 3.79515  | 0.01302 | 769.79095 | 0.26128 |
| 1423 | 4911.70813 | 13.70301 | 8926.54185  | 533.73585  | 2.00520  | 0.01676 | 775.48726 | 0.22287 |
| 1424 | 4291.77721 | 18.10723 | 6914.77057  | 664.23876  | 1.53881  | 0.04874 | 737.45087 | 0.53432 |
| 1425 | 3319.69992 | 17.60203 | 7377.95650  | 254.79798  | 0.65091  | 0.08123 | 116.53339 | 0.78464 |
| 1426 | 3179.43574 | 16.39025 | 9700.14479  | 487.23357  | 2.77813  | 0.20918 | 425.95018 | 0.63279 |
| 1427 | 4335.49381 | 17.19507 | 8161.01653  | 455.85195  | 3.24762  | 0.04411 | 465.93425 | 0.42873 |
| 1428 | 3347.81987 | 7.16059  | 13183.85818 | 278.29550  | 0.56334  | 0.03192 | 229.95366 | 0.55148 |
| 1429 | 3679.52076 | 7.68935  | 5913.66614  | 402.39823  | -1.09475 | 0.02382 | 425.64185 | 0.52754 |
| 1430 | 4286.24675 | 17.68946 | 7491.34696  | 726.27833  | 3.28874  | 0.03993 | 754.73134 | 0.50574 |
| 1431 | 3558.01581 | 17.62367 | 7344.61164  | 426.60396  | 0.77267  | 0.11616 | 363.44722 | 0.87421 |
| 1432 | 4430.78077 | 20.12111 | 8109.72288  | 509.56190  | 7.78530  | 0.13279 | 579.38760 | 0.60541 |
| 1433 | 3859.02946 | 23.98325 | 12334.75448 | 911.55396  | 6.29071  | 0.02057 | 906.99940 | 0.06982 |
| 1434 | 4034.87309 | 9.21995  | 11234.11567 | 289.90704  | -0.85563 | 0.00897 | 380.93340 | 0.13945 |
| 1435 | 4553.19982 | 17.77375 | 8432.68406  | 384.10579  | 2.00729  | 0.02653 | 490.62844 | 0.30035 |
| 1436 | 4635.54283 | 15.38993 | 10157.19133 | 454.86931  | 3.85390  | 0.10172 | 636.25677 | 0.44250 |
| 1437 | 4753.47373 | 18.43824 | 8340.12833  | 47.50234   | 1.61419  | 0.00125 | 16.56405  | 1.28934 |
| 1438 | 4334.46790 | 17.14112 | 8151.72245  | 531.71614  | 3.02250  | 0.05167 | 566.67821 | 0.30255 |
| 1439 | 4091.81190 | 18.99242 | 6774.62536  | 639.52027  | 2.27786  | 0.06204 | 662.17480 | 0.63516 |
| 1440 | 3473.94116 | 13.91061 | 7295.21412  | 470.12444  | 1.59828  | 0.06235 | 430.34565 | 0.56941 |
| 1441 | 3776.56527 | 9.57115  | 8280.14010  | 390.06247  | -0.99056 | 0.04376 | 345.08598 | 0.63087 |
| 1442 | 3476.64982 | 13.90095 | 7326.48291  | 522.43763  | 1.69162  | 0.05717 | 480.16970 | 0.59737 |
| 1443 | 4874.25129 | 7.70532  | 9709.74891  | 491.14782  | 0.03796  | 0.00890 | 680.98613 | 0.24394 |
| 1444 | 3248.26236 | 19.84440 | 13384.49203 | 404.76690  | 1.95130  | 0.18026 | 346.71479 | 0.91082 |
| 1445 | 4414.06050 | 15.04291 | 24053.82012 | 67.27225   | -3.31437 | 0.00061 | 38.26179  | 0.25968 |
| 1446 | 2484.95259 | 15.49398 | 3609.84546  | 385.83148  | 5.51394  | 0.35600 | 415.59538 | 0.86462 |
| 1447 | 4244.29774 | 19.12531 | 7251.48685  | 464.37100  | 4.71100  | 0.04959 | 447.79215 | 0.50891 |
| 1448 | 4329.47368 | 15.92745 | 9219.46159  | 428.18368  | 5.75510  | 0.11633 | 582.22371 | 0.43828 |
| 1449 | 4469.85306 | 22.84842 | 7116.04967  | 550.73143  | 4.81197  | 0.14528 | 648.82376 | 0.58385 |
| 1450 | 3736.24526 | 11.52144 | 8791.92859  | 595.46036  | -0.82596 | 0.03263 | 588.90949 | 0.61480 |
| 1451 | 4146.48181 | 16.46023 | 8894.15812  | 716.94804  | 1.23406  | 0.02486 | 775.00217 | 0.41652 |
| 1452 | 4004.72720 | 9.90549  | 9364.24602  | 368.81339  | -1.74034 | 0.00879 | 471.79197 | 0.18205 |
| 1453 | 5062.87472 | 13.65468 | 10278.62228 | 45.90563   | -3.24376 | 0.00022 | 27.97171  | 1.09861 |
| 1454 | 3620.47359 | 23.22329 | 5159.36293  | 374.17704  | 7.70284  | 0.08319 | 306.94476 | 0.46059 |
| 1455 | 2603.59767 | 26.23090 | 11615.60130 | 674.51451  | 8.00654  | 0.17967 | 396.07782 | 1.34529 |
| 1456 | 4410.79878 | 17.82420 | 7148.98126  | 582.57584  | 2.25735  | 0.05501 | 690.90145 | 0.35700 |
| 1457 | 4670.90659 | 16.61865 | 18057.73818 | 356.99725  | 3.81774  | 0.08783 | 487.36620 | 0.45968 |
| 1458 | 4873.74882 | 7.69559  | 9885.11629  | 386.76666  | -0.26042 | 0.00869 | 535.24128 | 0.24510 |
| 1459 | 4982.58240 | 17.70067 | 8855.62163  | 488.39349  | 2.12168  | 0.02160 | 643.39510 | 0.31180 |
| 1460 | 4850.96535 | 13.64238 | 11976.88689 | 566.18027  | 1.80473  | 0.03756 | 723.96836 | 0.45436 |
| 1461 | 4975.79293 | 10.29984 | 9098.40644  | 232.54889  | 1.90256  | 0.00437 | 341.67009 | 0.16400 |
| 1462 | 3138.26215 | 15.60612 | 6736.56415  | 274.11835  | 1.52858  | 0.01749 | 261.36918 | 0.18487 |
| 1463 | 3137.22071 | 18.27259 | 10283.77346 | 485.58647  | 3.12454  | 0.18819 | 437.90690 | 0.79123 |
| 1464 | 4253.72913 | 18.97467 | 7162.08394  | 830.60033  | 2.50513  | 0.04071 | 922.66738 | 0.45717 |
| 1465 | 4281.52072 | 14.16447 | 6882.47017  | 481.84289  | -2.52452 | 0.02001 | 544.29229 | 0.46809 |
| 1466 | 3546.97750 | 16.83663 | 17548.67774 | 413.71308  | 1.26988  | 0.15219 | 348.82940 | 0.70008 |
| 1467 | 3284.42074 | 18.13358 | 9890.38411  | 314.53472  | 2.16182  | 0.12840 | 208.34221 | 0.86144 |
| 1468 | 4467.88342 | 20.38062 | 13560.33888 | 359.79325  | 6.34221  | 0.07752 | 407.38820 | 0.37469 |
| 1469 | 4292.60682 | 18.15432 | 6923.91052  | 632.71638  | 1.05975  | 0.04799 | 714.50048 | 0.53199 |
| 1470 | 4950.88890 | 10.71231 | 10155.84003 | 124.05317  | 1.14408  | 0.00304 | 148.26735 | 0.29824 |
| 1471 | 4572.22388 | 17.92276 | 8310.30378  | 355.01199  | 3.24012  | 0.02771 | 445.67813 | 0.30936 |
| 1472 | 4254.54223 | 18.99866 | 7157.55228  | 848.68713  | 3.56331  | 0.05314 | 920.55782 | 0.39288 |
| 1473 | 4680.87772 | 10.66571 | 16611.73466 | 76.35578   | 1.91914  | 0.00789 | 45.65108  | 0.47071 |
| 1474 | 5003.30510 | 7.79051  | 13081.30416 | 172.48151  | 0.16005  | 0.00222 | 239.39524 | 0.05158 |
| 1475 | 3710.59351 | 24.60547 | 6228.83351  | 652.35772  | 2.78503  | 0.04164 | 595.95258 | 0.47196 |
| 1476 | 2977.13483 | 16.92898 | 15629.63499 | 378.73863  | 3.43380  | 0.14356 | 375.33439 | 0.85676 |
| 1477 | 4310.73096 | 18.14009 | 7633.30381  | 386.33681  | 6.64579  | 0.11246 | 431.97215 | 0.41535 |
| 1478 | 4069.97501 | 25.69846 | 8974.27354  | 672.94523  | 2.58606  | 0.01116 | 676.97846 | 0.43969 |
| 1479 | 4289.04621 | 17.64488 | 7512.83349  | 707.45060  | 2.72550  | 0.04329 | 744.56799 | 0.44148 |
| 1480 | 4784.00295 | 22.28142 | 10648.41353 | 561.54148  | 3.06306  | 0.04769 | 710.54695 | 0.49660 |
| 1481 | 4191.79984 | 13.02829 | 12507.33413 | 66.42674   | -2.43024 | 0.00408 | 43.78880  | 1.09665 |
| 1482 | 3369.97814 | 7.50138  | 13519.26663 | 357.44283  | 0.76223  | 0.03046 | 307.91053 | 0.55158 |
| 1483 | 4381.24679 | 18.86779 | 8610.93020  | 589.51341  | 1.43231  | 0.03716 | 655.85607 | 0.39796 |
| 1484 | 4281.49738 | 14.23468 | 6829.80607  | 602.52597  | -0.62302 | 0.02527 | 714.86793 | 0.40294 |
| 1485 | 4737.74243 | 15.91462 | 12173.59183 | 344.47013  | 2.78598  | 0.04721 | 470.42150 | 0.42868 |

|      |            |          |             |           |          |         |           |         |
|------|------------|----------|-------------|-----------|----------|---------|-----------|---------|
| 1486 | 4975.02211 | 10.27415 | 9090.83027  | 273.26045 | 0.61858  | 0.00434 | 407.46323 | 0.16189 |
| 1487 | 4468.15861 | 20.37275 | 13704.81449 | 375.14467 | 6.36726  | 0.10711 | 430.99624 | 0.48376 |
| 1488 | 4528.53306 | 20.10826 | 21600.28925 | 430.71482 | 5.69225  | 0.11865 | 564.59986 | 0.35174 |
| 1489 | 4970.08039 | 17.26641 | 7951.58082  | 604.51060 | -0.57922 | 0.01860 | 803.14865 | 0.29224 |
| 1490 | 4969.70509 | 10.92185 | 10229.11481 | 89.02269  | 1.34258  | 0.00278 | 77.98262  | 0.30343 |
| 1491 | 3489.76695 | 13.81283 | 7416.70594  | 418.58149 | 0.91532  | 0.05122 | 352.50403 | 0.72250 |
| 1492 | 5030.36194 | 18.28327 | 10322.21442 | 227.36997 | 1.96482  | 0.01411 | 300.23268 | 0.26006 |
| 1493 | 5028.06587 | 18.36848 | 9233.56735  | 377.45570 | 3.65702  | 0.01906 | 534.89083 | 0.18532 |
| 1494 | 4851.23771 | 13.64480 | 11909.05376 | 615.53404 | 1.28003  | 0.04035 | 795.00825 | 0.48625 |
| 1495 | 4561.12254 | 10.45436 | 15434.90913 | 76.38290  | -0.10188 | 0.00166 | 66.30476  | 1.24944 |
| 1496 | 4674.90980 | 18.89414 | 12411.77800 | 659.08402 | 5.27602  | 0.04559 | 824.34568 | 0.38489 |
| 1497 | 3293.66996 | 17.27086 | 7429.99252  | 339.14985 | 0.09058  | 0.08568 | 225.10461 | 0.78263 |
| 1498 | 4815.94344 | 20.79762 | 7760.97603  | 470.76683 | 4.15159  | 0.05221 | 556.69858 | 0.43048 |
| 1499 | 4705.98651 | 11.09111 | 15918.30892 | 107.74992 | 2.34520  | 0.00492 | 126.83442 | 0.22985 |
| 1500 | 4973.83135 | 8.61303  | 8948.76408  | 272.72011 | 3.60368  | 0.00419 | 398.27107 | 0.10482 |
| 1501 | 4617.08180 | 21.71054 | 15581.33576 | 402.32201 | 4.09927  | 0.06420 | 455.30041 | 0.53275 |
| 1502 | 4652.55057 | 22.41530 | 9645.86473  | 720.36598 | 2.17485  | 0.03315 | 915.59218 | 0.41687 |
| 1503 | 4744.92590 | 21.84805 | 10227.08531 | 492.79638 | 2.92694  | 0.05839 | 635.27352 | 0.41641 |
| 1504 | 2552.14780 | 15.50962 | 4082.38393  | 489.51920 | 5.57944  | 0.24435 | 521.94167 | 0.76295 |
| 1505 | 4847.41737 | 13.60622 | 12182.79279 | 451.16137 | 1.66388  | 0.03409 | 574.21561 | 0.46445 |
| 1506 | 4135.78772 | 12.97756 | 12552.85902 | 263.45932 | -0.67996 | 0.00780 | 335.93147 | 0.16485 |
| 1507 | 4774.25126 | 10.20078 | 11812.35535 | 516.77540 | -1.55063 | 0.00779 | 696.48545 | 0.11983 |
| 1508 | 4300.17402 | 15.21312 | 12130.18749 | 501.86430 | -0.64168 | 0.01783 | 624.78624 | 0.30312 |
| 1509 | 2455.77087 | 13.53697 | 3914.46186  | 454.21604 | 6.12708  | 0.25398 | 527.60688 | 0.41426 |
| 1510 | 3312.18993 | 14.66146 | 11481.25437 | 332.92694 | 2.87508  | 0.08157 | 304.02199 | 0.54167 |
| 1511 | 3308.47776 | 14.61365 | 11508.54753 | 353.12053 | 1.86419  | 0.05898 | 333.77885 | 0.62292 |
| 1512 | 3312.73267 | 14.61095 | 11484.09871 | 332.23328 | 1.51406  | 0.05797 | 310.33537 | 0.59299 |
| 1513 | 4299.03442 | 15.20975 | 12142.99664 | 539.65265 | -0.86610 | 0.01953 | 665.78397 | 0.32332 |
| 1514 | 4711.11944 | 15.82476 | 11390.07644 | 464.18234 | 2.94286  | 0.05680 | 614.85553 | 0.36857 |
| 1515 | 4301.50000 | 32.88361 | 1204.18848  | 29.10048  | 4.29430  | 0.01663 | 0.51243   | 0.91943 |
| 1516 | 5002.98629 | 7.78259  | 13758.60728 | 163.02274 | -1.11706 | 0.00201 | 228.44653 | 0.06961 |
| 1517 | 4406.55197 | 17.86633 | 14059.21678 | 59.00659  | 1.98650  | 0.00940 | 19.94872  | 1.18736 |
| 1518 | 3502.20647 | 15.33834 | 11514.04015 | 442.99209 | 1.95443  | 0.09221 | 398.29686 | 0.54914 |
| 1519 | 4240.48108 | 17.40044 | 7588.85991  | 764.44455 | 1.44162  | 0.02957 | 853.88016 | 0.31580 |
| 1520 | 5012.25304 | 9.99514  | 9149.62026  | 316.37006 | 1.50359  | 0.00457 | 470.28435 | 0.14445 |
| 1521 | 3610.48369 | 13.24044 | 20545.39158 | 310.98319 | 1.07771  | 0.01301 | 406.02552 | 0.26860 |
| 1522 | 4710.52747 | 15.80926 | 11376.42691 | 378.33630 | 4.94467  | 0.05183 | 500.33524 | 0.35367 |
| 1523 | 4670.17154 | 18.83134 | 12319.77886 | 501.47485 | 3.04330  | 0.03831 | 645.67976 | 0.37440 |
| 1524 | 4048.01827 | 9.09623  | 11671.67548 | 248.06195 | -1.00955 | 0.00581 | 332.08974 | 0.12021 |
| 1525 | 3724.29136 | 24.54207 | 6202.00813  | 463.30811 | 2.44498  | 0.03943 | 349.14510 | 0.48334 |
| 1526 | 4887.04494 | 9.35133  | 12684.07957 | 415.40937 | 1.80849  | 0.01950 | 619.35990 | 0.23069 |
| 1527 | 3407.08046 | 19.12770 | 19799.46128 | 404.91795 | 0.91312  | 0.10866 | 333.05815 | 0.93367 |
| 1528 | 4672.82579 | 18.85033 | 12373.80828 | 600.40526 | 4.15349  | 0.04218 | 753.32995 | 0.37502 |
| 1529 | 2928.66498 | 20.18881 | 8113.07360  | 426.38040 | 4.53331  | 0.28982 | 251.85071 | 1.06127 |
| 1530 | 2982.29907 | 17.03772 | 15814.54178 | 363.38377 | 4.46594  | 0.21196 | 347.27928 | 0.83006 |
| 1531 | 4089.21653 | 18.95100 | 6753.86566  | 642.99851 | 3.50721  | 0.06329 | 620.71673 | 0.61769 |
| 1532 | 4265.68098 | 16.21262 | 7766.43315  | 657.86664 | 1.10281  | 0.05023 | 690.15975 | 0.46386 |
| 1533 | 4663.03055 | 19.56603 | 12856.20148 | 342.61688 | 5.50275  | 0.08510 | 467.29188 | 0.48431 |
| 1534 | 4492.94832 | 12.54518 | 9304.80454  | 641.86317 | 0.40489  | 0.02867 | 753.56019 | 0.25355 |
| 1535 | 4544.58769 | 20.94952 | 12082.63671 | 668.66437 | 3.23242  | 0.01107 | 812.89453 | 0.24920 |
| 1536 | 4131.10398 | 12.88227 | 12554.48427 | 310.08568 | -1.08396 | 0.00773 | 409.61044 | 0.15742 |
| 1537 | 3500.74391 | 9.29543  | 7978.87831  | 461.04149 | 1.16442  | 0.03941 | 380.24627 | 0.49218 |
| 1538 | 4423.41464 | 11.47776 | 8369.59231  | 549.43815 | -0.40363 | 0.01274 | 681.39769 | 0.17317 |
| 1539 | 4761.47633 | 14.79940 | 11449.10485 | 444.06474 | 3.80821  | 0.01933 | 653.20309 | 0.35972 |
| 1540 | 4844.01885 | 8.84088  | 9383.17919  | 110.71396 | 0.21421  | 0.00381 | 103.49763 | 0.60378 |
| 1541 | 5003.44129 | 7.79658  | 13083.05400 | 208.07369 | 0.08949  | 0.00225 | 310.71245 | 0.05440 |
| 1542 | 3909.37561 | 12.91523 | 12022.24086 | 531.60987 | 1.02317  | 0.03895 | 600.23779 | 0.43672 |
| 1543 | 2940.62544 | 26.37217 | 12657.25434 | 557.93545 | 5.78917  | 0.11435 | 293.34177 | 1.64315 |
| 1544 | 4628.48395 | 22.28256 | 9821.40921  | 672.27991 | 2.96413  | 0.03951 | 843.85557 | 0.41679 |
| 1545 | 4325.78123 | 21.87442 | 8628.83221  | 666.69070 | 2.08037  | 0.03576 | 703.80522 | 0.53446 |
| 1546 | 4826.96385 | 20.87062 | 7831.53757  | 628.46691 | 3.13514  | 0.06058 | 767.94113 | 0.39487 |
| 1547 | 4416.26247 | 17.86621 | 7173.78402  | 640.96295 | 1.78449  | 0.04153 | 753.22701 | 0.40854 |
| 1548 | 3338.23681 | 7.02082  | 13043.53396 | 348.52146 | 0.48630  | 0.03293 | 317.91375 | 0.57384 |
| 1549 | 4507.35986 | 21.14458 | 9954.99539  | 387.63157 | 5.77989  | 0.07499 | 436.26320 | 0.54925 |
| 1550 | 4343.01589 | 21.90275 | 8685.15501  | 718.93181 | 2.66875  | 0.04072 | 779.51788 | 0.53392 |
| 1551 | 4874.02771 | 9.78819  | 6939.52905  | 95.68516  | 1.27744  | 0.00480 | 86.70233  | 0.25749 |
| 1552 | 4878.84339 | 7.75633  | 10062.33960 | 389.89185 | -0.50410 | 0.00807 | 518.28912 | 0.26366 |
| 1553 | 3379.06974 | 9.67314  | 6888.48706  | 389.63178 | 2.12217  | 0.05887 | 421.28259 | 0.42317 |
| 1554 | 4763.21571 | 21.58150 | 20164.41983 | 361.03519 | 5.19253  | 0.03356 | 442.79839 | 0.33566 |
| 1555 | 4460.82588 | 21.79523 | 7625.61030  | 455.96133 | 4.31817  | 0.03770 | 568.92611 | 0.26708 |
| 1556 | 2485.75811 | 14.98853 | 3012.45903  | 350.90475 | 5.25496  | 0.37394 | 455.67586 | 1.19627 |

|      |            |          |             |           |          |         |           |         |
|------|------------|----------|-------------|-----------|----------|---------|-----------|---------|
| 1557 | 4426.31284 | 17.36618 | 10694.63291 | 587.24977 | 2.13752  | 0.02908 | 657.29931 | 0.40966 |
| 1558 | 4699.50966 | 11.05587 | 15847.90780 | 173.21095 | 5.48464  | 0.00530 | 237.39329 | 0.21674 |
| 1559 | 4248.14702 | 19.11453 | 7268.59431  | 381.12642 | 3.88338  | 0.04848 | 378.54714 | 0.50566 |
| 1560 | 2445.07496 | 13.62068 | 3744.29888  | 428.68159 | 6.29802  | 0.23378 | 386.32378 | 0.34230 |
| 1561 | 4779.21950 | 10.40676 | 11697.42402 | 394.05493 | -1.21561 | 0.01279 | 515.64278 | 0.17187 |
| 1562 | 4712.29522 | 15.85098 | 11392.03205 | 565.88042 | 4.07037  | 0.05679 | 745.69794 | 0.39253 |
| 1563 | 4894.36785 | 9.47690  | 10020.44706 | 559.60986 | -0.51994 | 0.02368 | 725.46184 | 0.40221 |
| 1564 | 4607.09812 | 22.30897 | 8626.69394  | 692.97283 | 2.88107  | 0.05277 | 839.09057 | 0.35618 |
| 1565 | 3573.84424 | 17.67749 | 7376.45074  | 453.98290 | 0.44395  | 0.09802 | 430.07813 | 0.82184 |
| 1566 | 4875.93308 | 16.85498 | 8561.78030  | 460.81981 | 3.29470  | 0.06486 | 597.60890 | 0.32560 |
| 1567 | 4886.82207 | 9.34766  | 12596.68938 | 425.23443 | 2.62976  | 0.01874 | 636.19881 | 0.23237 |
| 1568 | 4750.01308 | 21.54875 | 19547.93769 | 541.85244 | 3.25667  | 0.03547 | 692.69676 | 0.37471 |
| 1569 | 4759.71490 | 18.20787 | 10682.11526 | 628.94833 | 2.18594  | 0.03362 | 805.01932 | 0.37328 |
| 1570 | 4576.18474 | 22.50516 | 12960.22201 | 616.87255 | 4.92324  | 0.03180 | 756.61358 | 0.33700 |
| 1571 | 3372.40417 | 20.16580 | 10747.82146 | 247.64700 | 4.18362  | 0.01916 | 290.39851 | 1.01146 |
| 1572 | 4855.02232 | 13.72791 | 11584.20900 | 492.00660 | 2.18731  | 0.04458 | 630.68299 | 0.51311 |
| 1573 | 3385.92683 | 17.91582 | 19251.09886 | 332.99310 | 0.89633  | 0.08940 | 202.82218 | 0.80945 |
| 1574 | 3538.18439 | 9.34512  | 7262.28855  | 580.06521 | 2.50188  | 0.04296 | 513.79382 | 0.70744 |
| 1575 | 2936.72163 | 24.88752 | 7049.26589  | 572.01259 | 6.16259  | 0.15670 | 374.31604 | 0.99164 |
| 1576 | 3788.54498 | 24.17291 | 11034.02345 | 715.79592 | 2.78607  | 0.03785 | 673.95132 | 0.74295 |
| 1577 | 4636.71561 | 16.96969 | 10101.66167 | 406.96787 | 4.50821  | 0.06167 | 561.54978 | 0.53014 |
| 1578 | 2447.00987 | 13.65558 | 3892.86648  | 436.57632 | 5.53343  | 0.26909 | 488.97281 | 0.42702 |
| 1579 | 4795.03341 | 10.39269 | 11107.56141 | 565.85517 | 1.77917  | 0.03715 | 714.04387 | 0.42150 |
| 1580 | 4431.92747 | 20.17550 | 8121.82178  | 531.55001 | 4.80647  | 0.12869 | 601.31120 | 0.59064 |
| 1581 | 3539.68308 | 17.33254 | 8061.68162  | 393.68692 | -1.53184 | 0.04262 | 382.70324 | 0.61163 |
| 1582 | 2916.71952 | 25.05343 | 6983.37450  | 629.90800 | 6.72073  | 0.16518 | 390.00026 | 0.91618 |
| 1583 | 4708.19309 | 11.05765 | 15924.12232 | 102.46587 | 1.84091  | 0.00466 | 87.91938  | 0.23439 |
| 1584 | 4195.17434 | 23.77889 | 8461.08469  | 682.41159 | 2.07564  | 0.05300 | 749.92696 | 0.58156 |
| 1585 | 4374.64310 | 20.36701 | 9971.76819  | 613.50143 | 2.10315  | 0.03732 | 702.53717 | 0.43969 |
| 1586 | 4515.31317 | 21.22906 | 10047.89743 | 372.31146 | 6.57737  | 0.05869 | 443.80647 | 0.54333 |
| 1587 | 2575.62565 | 15.09387 | 10784.52786 | 471.02984 | 5.96516  | 0.28013 | 452.71372 | 0.59682 |
| 1588 | 4969.86296 | 10.96003 | 10238.50218 | 97.34304  | 0.10034  | 0.00321 | 95.88347  | 0.26224 |
| 1589 | 5113.44361 | 10.97978 | 14444.93681 | 128.95390 | -0.46455 | 0.00212 | 162.98487 | 0.17478 |
| 1590 | 4475.36962 | 21.01616 | 9267.23124  | 559.67782 | 2.69190  | 0.04464 | 753.61228 | 0.39127 |
| 1591 | 3848.26068 | 23.86251 | 7188.85540  | 736.99141 | 5.83829  | 0.06168 | 742.96227 | 0.44289 |
| 1592 | 4374.53987 | 20.37660 | 9977.48934  | 699.65478 | 2.59660  | 0.04097 | 795.18558 | 0.42909 |
| 1593 | 4921.16194 | 10.87553 | 8928.55332  | 133.14154 | 1.27447  | 0.00476 | 161.59650 | 0.14712 |
| 1594 | 4972.72536 | 8.58230  | 9519.30836  | 238.46608 | 0.30534  | 0.00323 | 343.42517 | 0.11867 |
| 1595 | 4835.56837 | 15.61322 | 8499.40466  | 295.34879 | 2.64753  | 0.02278 | 418.89744 | 0.38023 |
| 1596 | 4428.40305 | 14.87427 | 25780.48192 | 89.21617  | -3.33328 | 0.00032 | 64.25213  | 0.77837 |
| 1597 | 4151.48041 | 15.68057 | 12897.33413 | 100.04107 | 1.16868  | 0.00264 | 83.58150  | 0.92461 |
| 1598 | 4851.74853 | 13.66843 | 11910.92716 | 524.16824 | 2.28198  | 0.04020 | 667.33141 | 0.46781 |
| 1599 | 3833.45118 | 15.80862 | 8641.27693  | 648.68937 | 2.40864  | 0.03378 | 626.49618 | 0.55216 |
| 1600 | 4344.04118 | 21.90717 | 8685.04367  | 752.13542 | 2.43709  | 0.04148 | 847.34699 | 0.53697 |
| 1601 | 4644.75983 | 20.77243 | 9182.35156  | 474.77261 | 4.28132  | 0.06979 | 567.49971 | 0.49376 |
| 1602 | 4279.59220 | 18.47603 | 16078.06082 | 67.84165  | 1.66144  | 0.00929 | 25.14022  | 0.83072 |
| 1603 | 4974.87570 | 10.32681 | 8717.24739  | 229.20396 | 3.73422  | 0.00486 | 326.41270 | 0.13151 |
| 1604 | 4552.40094 | 17.75378 | 8382.99605  | 528.35899 | 1.41300  | 0.02596 | 694.61660 | 0.29931 |
| 1605 | 3577.37285 | 13.31242 | 5259.45967  | 551.03558 | 1.95338  | 0.04018 | 513.20130 | 0.72478 |
| 1606 | 4246.35953 | 19.01120 | 7266.88988  | 531.81191 | 3.29707  | 0.04222 | 571.76124 | 0.46718 |
| 1607 | 3374.57921 | 7.57301  | 13658.33968 | 310.68746 | 0.88363  | 0.03136 | 258.53230 | 0.50402 |
| 1608 | 3934.42299 | 20.07454 | 9090.23568  | 752.39101 | 6.09929  | 0.06010 | 677.82255 | 0.72341 |
| 1609 | 4342.23168 | 18.76506 | 7866.58464  | 422.14446 | 6.37003  | 0.11560 | 506.17791 | 0.40377 |
| 1610 | 4553.56384 | 20.49877 | 17586.79203 | 333.58017 | 5.68804  | 0.09687 | 384.11524 | 0.40559 |
| 1611 | 4011.65364 | 9.38128  | 9048.39856  | 388.84414 | -1.69988 | 0.00696 | 492.72201 | 0.23667 |
| 1612 | 3914.84003 | 12.93147 | 12079.00716 | 433.20975 | 0.43707  | 0.03490 | 504.05161 | 0.45521 |
| 1613 | 4670.49939 | 20.15026 | 7780.45529  | 405.85470 | 5.05177  | 0.04742 | 581.36086 | 0.25102 |
| 1614 | 4926.78005 | 7.60989  | 9219.94998  | 330.06071 | -1.91817 | 0.00037 | 498.11310 | 0.02991 |
| 1615 | 4756.82971 | 21.59024 | 20099.18296 | 441.32569 | 4.64646  | 0.03237 | 567.23999 | 0.34576 |
| 1616 | 2572.27506 | 15.50573 | 10954.91782 | 531.42486 | 5.31669  | 0.31051 | 543.71305 | 0.10167 |
| 1617 | 4886.39427 | 9.35646  | 12585.73226 | 391.35348 | 3.68089  | 0.02179 | 588.06828 | 0.22150 |
| 1618 | 4690.23131 | 13.50302 | 9639.73515  | 382.29948 | 2.01809  | 0.02015 | 452.58850 | 0.23150 |
| 1619 | 2514.18914 | 26.21338 | 11091.58539 | 630.39598 | 8.21869  | 0.19571 | 392.88594 | 1.37072 |
| 1620 | 3515.94710 | 9.35814  | 8279.13634  | 396.33493 | -1.07711 | 0.02904 | 315.84001 | 0.46564 |
| 1621 | 4893.91902 | 9.46081  | 10019.78795 | 483.41836 | 0.01088  | 0.02485 | 640.56579 | 0.41666 |
| 1622 | 4844.35929 | 12.71640 | 15148.49337 | 309.72792 | 3.78962  | 0.02546 | 430.72326 | 0.30615 |
| 1623 | 3669.24691 | 14.10435 | 9943.16832  | 313.66226 | 0.05838  | 0.06643 | 282.06224 | 0.55676 |
| 1624 | 5019.42331 | 13.76207 | 8483.89455  | 356.76352 | 2.17419  | 0.01649 | 533.10564 | 0.16460 |
| 1625 | 4488.23009 | 22.91123 | 7126.25931  | 465.43155 | 5.83900  | 0.15305 | 501.84214 | 0.65693 |
| 1626 | 3488.02779 | 13.81312 | 7414.16642  | 483.36822 | 0.69263  | 0.05382 | 429.91465 | 0.71052 |
| 1627 | 4516.14011 | 21.19830 | 10049.46113 | 577.86568 | 4.21833  | 0.08762 | 712.96464 | 0.52241 |

|      |            |          |             |            |          |         |           |         |
|------|------------|----------|-------------|------------|----------|---------|-----------|---------|
| 1628 | 3671.30244 | 14.09904 | 9992.48174  | 406.49321  | 1.37953  | 0.06944 | 367.24529 | 0.64464 |
| 1629 | 3272.74276 | 18.36192 | 10250.80802 | 374.46432  | 3.30260  | 0.18102 | 301.22388 | 0.85348 |
| 1630 | 4497.51812 | 20.75918 | 11644.35239 | 627.32799  | 5.56212  | 0.01916 | 766.38398 | 0.31579 |
| 1631 | 5009.26276 | 10.09771 | 9273.11767  | 324.28187  | 1.37502  | 0.00526 | 480.36821 | 0.14710 |
| 1632 | 3647.24134 | 23.93637 | 10479.26166 | 1036.60935 | 6.50328  | 0.05538 | 897.37308 | 1.13805 |
| 1633 | 2575.54303 | 15.01494 | 10812.85332 | 477.15652  | 5.68044  | 0.28115 | 511.39583 | 0.49912 |
| 1634 | 3515.80189 | 9.34733  | 8247.85962  | 409.63601  | -1.08702 | 0.02885 | 352.23286 | 0.51764 |
| 1635 | 3218.80261 | 16.52423 | 12214.76214 | 345.94757  | 2.19101  | 0.07997 | 255.39943 | 0.74695 |
| 1636 | 3253.20956 | 18.34139 | 18130.39492 | 408.06551  | 2.19989  | 0.18723 | 331.97025 | 0.85173 |
| 1637 | 2903.46749 | 16.25065 | 14864.92234 | 442.12358  | 4.97583  | 0.20474 | 417.37962 | 0.59725 |
| 1638 | 3211.87736 | 14.53262 | 9955.99520  | 429.41093  | 2.93860  | 0.09757 | 512.74349 | 0.43635 |
| 1639 | 4186.32943 | 12.27874 | 12572.16379 | 221.35242  | -1.51742 | 0.00449 | 270.92429 | 0.21522 |
| 1640 | 4606.25370 | 22.29726 | 8629.08045  | 669.31425  | 2.49641  | 0.04248 | 820.05139 | 0.38015 |
| 1641 | 2458.31112 | 13.49732 | 3931.78473  | 479.37090  | 5.49717  | 0.25330 | 530.96378 | 0.42083 |
| 1642 | 5094.25834 | 9.69782  | 14243.71293 | 131.44529  | -0.81709 | 0.00220 | 161.94819 | 0.29893 |
| 1643 | 4877.53009 | 16.84869 | 8592.52988  | 374.98563  | 3.79373  | 0.05681 | 475.13690 | 0.41260 |
| 1644 | 4395.49970 | 22.61977 | 8475.16296  | 536.74068  | 5.14217  | 0.01878 | 711.41811 | 0.27744 |
| 1645 | 3633.02365 | 12.60831 | 22262.27423 | 246.08711  | 0.24877  | 0.02331 | 257.41734 | 0.45305 |
| 1646 | 4899.19158 | 13.49774 | 8173.82629  | 499.35114  | 0.82540  | 0.01672 | 720.26387 | 0.22677 |
| 1647 | 4748.81380 | 15.99530 | 20803.91931 | 301.67089  | 3.32581  | 0.05275 | 394.88022 | 0.63742 |
| 1648 | 4736.47468 | 21.75097 | 10160.86034 | 306.77815  | 5.12759  | 0.06312 | 357.74116 | 0.48564 |
| 1649 | 4898.51469 | 12.86314 | 7391.43609  | 390.42787  | 4.44038  | 0.03990 | 523.41323 | 0.29665 |
| 1650 | 4967.68454 | 9.86770  | 8854.69804  | 396.57684  | 1.22649  | 0.00736 | 571.41699 | 0.16479 |
| 1651 | 3176.66740 | 15.89308 | 12197.62604 | 251.91955  | 2.92726  | 0.10017 | 186.34217 | 0.74673 |
| 1652 | 2961.40105 | 24.95603 | 7110.50241  | 677.72707  | 6.67546  | 0.17293 | 469.56849 | 0.79235 |
| 1653 | 4805.89458 | 22.31211 | 11473.17783 | 788.06455  | 3.19780  | 0.01495 | 989.96543 | 0.26912 |
| 1654 | 5112.98043 | 10.96182 | 14094.52849 | 125.94419  | -0.01192 | 0.00252 | 164.30485 | 0.15912 |
| 1655 | 4282.18862 | 14.24162 | 6828.40785  | 580.75734  | -0.42827 | 0.02276 | 694.41386 | 0.44742 |
| 1656 | 3852.70828 | 24.43450 | 6284.13181  | 852.94025  | 3.28693  | 0.01583 | 818.69697 | 0.82916 |
| 1657 | 4910.09639 | 13.61046 | 8086.52222  | 518.13137  | 2.18067  | 0.01669 | 749.30265 | 0.20512 |
| 1658 | 4894.07138 | 9.47502  | 10147.84371 | 555.37520  | 1.27691  | 0.03201 | 700.83985 | 0.38050 |
| 1659 | 3916.22427 | 12.97754 | 12086.58108 | 385.73620  | 0.31580  | 0.02953 | 403.56087 | 0.44566 |
| 1660 | 4837.03255 | 14.49784 | 10645.11014 | 362.94895  | 2.63301  | 0.03024 | 547.82619 | 0.23780 |
| 1661 | 4461.89995 | 21.71918 | 7678.23518  | 559.42979  | 3.38594  | 0.02987 | 702.11498 | 0.35223 |
| 1662 | 4790.13972 | 10.24361 | 11153.39444 | 569.44175  | 0.60137  | 0.02631 | 728.28051 | 0.39030 |
| 1663 | 5078.82921 | 9.56044  | 14405.49747 | 139.95337  | -1.49978 | 0.00242 | 179.00142 | 0.35300 |
| 1664 | 3686.28326 | 7.71719  | 5947.40833  | 353.76875  | -1.61600 | 0.02679 | 340.56816 | 0.48363 |
| 1665 | 4545.31362 | 20.95424 | 12090.12872 | 583.59584  | 3.30012  | 0.01124 | 703.80188 | 0.25156 |
| 1666 | 3903.35683 | 24.72044 | 10046.06097 | 873.86030  | 5.36205  | 0.01353 | 920.68497 | 0.35729 |
| 1667 | 4467.07418 | 20.36889 | 13556.47237 | 491.19233  | 4.35719  | 0.07514 | 612.43220 | 0.35706 |
| 1668 | 4894.47562 | 12.77548 | 7472.17633  | 359.86268  | 3.13613  | 0.03826 | 478.94901 | 0.31648 |
| 1669 | 4080.64265 | 21.81675 | 8937.65450  | 758.98269  | 2.88842  | 0.02941 | 755.23115 | 0.55158 |
| 1670 | 4432.42578 | 14.70387 | 6178.34622  | 446.74196  | 2.93381  | 0.02542 | 478.52112 | 0.33856 |
| 1671 | 5020.58183 | 13.81003 | 8331.50782  | 366.25048  | 2.44423  | 0.01803 | 543.23512 | 0.16981 |
| 1672 | 4327.40167 | 15.80038 | 9150.90232  | 386.39032  | 6.71691  | 0.11995 | 507.11688 | 0.43603 |
| 1673 | 4981.14257 | 17.70215 | 8860.87313  | 711.47039  | 1.62826  | 0.02289 | 918.63234 | 0.31447 |
| 1674 | 4783.10928 | 16.52618 | 9811.12122  | 421.98151  | 0.18599  | 0.02877 | 552.76149 | 0.37276 |
| 1675 | 3656.84121 | 23.86796 | 10511.54112 | 1080.49398 | 8.68777  | 0.07401 | 885.40995 | 0.85255 |
| 1676 | 4082.80182 | 20.23421 | 14834.80465 | 94.14184   | 2.05130  | 0.01142 | 54.99718  | 0.57780 |
| 1677 | 3192.06738 | 16.67805 | 7058.22068  | 315.01898  | 1.61595  | 0.09748 | 206.99530 | 0.61295 |
| 1678 | 4852.66774 | 13.68082 | 11914.80145 | 384.81267  | 2.20837  | 0.03752 | 484.87292 | 0.43024 |
| 1679 | 3646.12438 | 23.90996 | 10464.24895 | 1120.88514 | 6.34680  | 0.04395 | 805.68409 | 1.14313 |
| 1680 | 3838.61369 | 23.84714 | 12118.44395 | 638.48820  | 6.99104  | 0.01915 | 590.04828 | 0.05662 |
| 1681 | 4784.09637 | 15.48433 | 7296.05246  | 531.73938  | 3.56698  | 0.01390 | 763.14955 | 0.21767 |
| 1682 | 3766.51965 | 11.90530 | 9272.64589  | 678.21703  | 1.53955  | 0.03058 | 694.46926 | 0.64065 |
| 1683 | 4875.69731 | 7.72509  | 9865.82901  | 408.65739  | 0.39629  | 0.01070 | 570.82453 | 0.20245 |
| 1684 | 4966.61386 | 9.96405  | 8576.57658  | 285.73111  | -0.52930 | 0.00452 | 425.94473 | 0.18880 |
| 1685 | 2566.34233 | 15.80643 | 11130.24558 | 359.68945  | 5.37802  | 0.31440 | 345.30250 | 0.44251 |
| 1686 | 4059.28518 | 9.21830  | 11966.27848 | 192.09418  | -1.22142 | 0.00323 | 222.47034 | 0.19861 |
| 1687 | 4451.74912 | 19.78040 | 7938.61843  | 519.15110  | 5.17251  | 0.07911 | 617.06595 | 0.58082 |
| 1688 | 4900.35191 | 9.88079  | 7852.85017  | 164.48262  | 1.05275  | 0.00492 | 215.59215 | 0.23499 |
| 1689 | 3526.89388 | 25.29850 | 9161.84875  | 80.73055   | 4.28748  | 0.00928 | 30.96616  | 1.51040 |
| 1690 | 5003.21062 | 7.78790  | 15193.48554 | 235.55966  | 0.67771  | 0.00217 | 352.23002 | 0.05560 |
| 1691 | 3274.98298 | 18.55903 | 18660.46782 | 424.72187  | 2.07146  | 0.20472 | 341.84134 | 0.96602 |
| 1692 | 4235.99123 | 23.37980 | 13381.20716 | 853.38836  | 3.16157  | 0.00904 | 962.79925 | 0.14452 |
| 1693 | 4795.21749 | 10.37965 | 11105.90826 | 646.13138  | 0.67686  | 0.02858 | 816.60127 | 0.44468 |
| 1694 | 2444.66280 | 13.61213 | 3737.23113  | 532.80900  | 6.09143  | 0.24133 | 522.82828 | 0.41652 |
| 1695 | 4333.10973 | 9.36027  | 6375.22949  | 718.84206  | 2.09417  | 0.05926 | 765.12467 | 0.37457 |
| 1696 | 3526.88064 | 16.71892 | 16960.02615 | 492.44420  | 1.81332  | 0.16508 | 441.54149 | 0.84316 |
| 1697 | 3133.56605 | 18.14606 | 10219.53719 | 433.71362  | 4.23996  | 0.19159 | 365.30061 | 0.60116 |
| 1698 | 4692.74582 | 7.47204  | 18873.08613 | 116.76807  | -5.17780 | 0.00003 | 142.83360 | 0.16675 |

|      |            |          |             |           |          |         |           |         |
|------|------------|----------|-------------|-----------|----------|---------|-----------|---------|
| 1699 | 4876.42206 | 16.85938 | 8560.60960  | 428.87025 | 3.01257  | 0.06584 | 563.70359 | 0.32602 |
| 1700 | 4666.09025 | 18.78386 | 12262.74260 | 542.31619 | 3.70731  | 0.04605 | 673.95987 | 0.35198 |
| 1701 | 4226.78393 | 24.74066 | 8257.33123  | 713.93880 | 2.30460  | 0.02126 | 802.92854 | 0.38154 |
| 1702 | 3407.74333 | 20.29052 | 7312.39412  | 90.07396  | 4.20060  | 0.02094 | 40.24697  | 1.18809 |
| 1703 | 4673.12520 | 20.18100 | 9976.50146  | 425.72791 | 4.04130  | 0.04549 | 607.82601 | 0.30366 |
| 1704 | 2942.01650 | 16.83495 | 14882.93708 | 318.43178 | 4.15304  | 0.23687 | 220.59399 | 0.71713 |
| 1705 | 4549.34687 | 16.04372 | 11291.10661 | 397.54049 | 5.71558  | 0.05945 | 574.43608 | 0.38245 |
| 1706 | 4843.59791 | 12.56080 | 12837.61211 | 436.55553 | 3.75770  | 0.02445 | 613.90267 | 0.33667 |
| 1707 | 3696.12566 | 14.24123 | 10446.23930 | 405.60308 | 0.81013  | 0.05852 | 381.70801 | 0.61218 |
| 1708 | 4604.85506 | 22.17458 | 10972.99625 | 432.01618 | 4.80642  | 0.06549 | 506.71194 | 0.58088 |
| 1709 | 3566.32090 | 17.62022 | 7333.55633  | 379.65922 | 1.16651  | 0.09870 | 336.76215 | 0.80606 |
| 1710 | 3133.62004 | 15.62498 | 6668.77884  | 300.90496 | 1.00120  | 0.01047 | 236.73637 | 0.24755 |
| 1711 | 4737.10309 | 21.72323 | 10154.97223 | 537.54248 | 2.81538  | 0.06829 | 687.77177 | 0.50045 |
| 1712 | 4687.74812 | 13.55627 | 9661.50064  | 429.94689 | 1.43058  | 0.02073 | 522.12028 | 0.20790 |
| 1713 | 3735.68827 | 11.58316 | 8714.81139  | 623.01299 | 0.64861  | 0.02694 | 594.66411 | 0.61545 |
| 1714 | 4711.31447 | 17.91598 | 16163.98185 | 394.67262 | 3.93269  | 0.02613 | 522.63942 | 0.21562 |
| 1715 | 4943.08585 | 13.09504 | 9351.07017  | 376.20350 | 3.34033  | 0.01084 | 571.50233 | 0.14503 |
| 1716 | 4244.52608 | 17.30362 | 7630.36960  | 654.17135 | -0.77815 | 0.02125 | 737.16787 | 0.53522 |
| 1717 | 4247.78351 | 19.07837 | 7243.51297  | 576.06848 | 4.21348  | 0.05585 | 609.72771 | 0.41438 |
| 1718 | 4196.58427 | 12.42478 | 12629.45304 | 231.57231 | -0.97460 | 0.00446 | 282.85702 | 0.21507 |
| 1719 | 4431.92164 | 15.52934 | 6486.15813  | 725.37129 | 2.90841  | 0.02757 | 811.35894 | 0.33771 |
| 1720 | 4625.23383 | 7.76685  | 16346.77720 | 103.65321 | -3.18653 | 0.00004 | 109.56629 | 0.07911 |
| 1721 | 4972.89020 | 8.58569  | 9177.34211  | 242.86750 | -0.32225 | 0.00341 | 348.83983 | 0.10375 |
| 1722 | 4522.69272 | 11.14118 | 14927.45774 | 79.06238  | -3.07115 | 0.00018 | 69.80083  | 1.31312 |
| 1723 | 3326.86205 | 24.28477 | 11491.47440 | 547.43108 | 4.43876  | 0.05984 | 479.55572 | 0.67982 |
| 1724 | 3575.60124 | 13.34510 | 5207.18814  | 486.87722 | 1.90341  | 0.03947 | 408.69366 | 0.67048 |
| 1725 | 4773.52558 | 21.64211 | 20312.01348 | 669.63618 | 3.70959  | 0.03615 | 887.56283 | 0.35328 |
| 1726 | 4754.04110 | 21.57088 | 19604.47995 | 534.85387 | 4.78933  | 0.03338 | 681.06287 | 0.28948 |
| 1727 | 4433.64180 | 15.57480 | 6459.35835  | 676.77846 | 2.84336  | 0.02347 | 744.07958 | 0.38118 |
| 1728 | 4842.59074 | 15.76479 | 8338.59602  | 442.12944 | 4.17441  | 0.03256 | 654.09310 | 0.18746 |
| 1729 | 2446.11477 | 13.60340 | 3739.37511  | 465.83800 | 6.60314  | 0.23506 | 479.69076 | 0.60104 |
| 1730 | 4178.19264 | 18.97878 | 8262.82708  | 661.49777 | 2.10952  | 0.03358 | 659.41900 | 0.51722 |
| 1731 | 2926.27745 | 20.06311 | 8184.37416  | 469.43548 | 4.60131  | 0.27983 | 326.89766 | 1.07575 |
| 1732 | 4705.02974 | 19.15324 | 9738.97606  | 611.24936 | 0.17362  | 0.04291 | 783.06489 | 0.28591 |
| 1733 | 3165.78975 | 18.25772 | 10500.18687 | 348.60955 | 3.76286  | 0.18713 | 276.60691 | 0.79789 |
| 1734 | 3766.09544 | 11.90857 | 9259.21555  | 673.99023 | 2.61134  | 0.03299 | 679.71133 | 0.61926 |
| 1735 | 5113.55300 | 10.97406 | 14451.21101 | 115.47427 | 0.64467  | 0.00216 | 141.15054 | 0.17770 |
| 1736 | 4191.70939 | 23.77840 | 8411.65959  | 828.88608 | 1.80790  | 0.05199 | 837.71842 | 0.54694 |
| 1737 | 4975.51718 | 10.29084 | 9095.96513  | 277.73541 | 1.91811  | 0.00452 | 411.05808 | 0.18361 |
| 1738 | 4791.86680 | 15.77409 | 7055.43281  | 380.66580 | 4.36039  | 0.01577 | 559.26906 | 0.19387 |
| 1739 | 4514.28149 | 19.81769 | 7364.19045  | 410.69129 | 1.56752  | 0.04525 | 480.64020 | 0.44487 |
| 1740 | 5024.87501 | 18.28488 | 10116.88690 | 364.36893 | 1.87056  | 0.01776 | 526.78969 | 0.24842 |
| 1741 | 4566.93250 | 20.64706 | 17828.88839 | 296.80635 | 6.55872  | 0.09232 | 343.82252 | 0.48912 |
| 1742 | 4639.27045 | 15.41821 | 10189.91107 | 327.63842 | 4.69388  | 0.09694 | 443.69834 | 0.44454 |
| 1743 | 4605.06677 | 20.65532 | 21021.08111 | 395.78073 | 4.29821  | 0.08125 | 508.02255 | 0.48630 |
| 1744 | 4657.85456 | 16.40001 | 17792.58192 | 252.49454 | 4.34361  | 0.09622 | 306.95230 | 0.43357 |
| 1745 | 3432.83964 | 8.17169  | 12993.10504 | 415.23941 | 1.94590  | 0.03882 | 448.48891 | 0.42821 |
| 1746 | 4951.98363 | 10.75853 | 10154.29411 | 167.88170 | -0.05898 | 0.00348 | 222.00185 | 0.25594 |
| 1747 | 4646.79682 | 22.37333 | 9655.57889  | 652.66938 | 3.20447  | 0.03492 | 816.00825 | 0.50495 |
| 1748 | 5091.20629 | 10.00071 | 14421.85948 | 111.01254 | -0.63874 | 0.00210 | 126.64412 | 0.27953 |
| 1749 | 4292.27525 | 18.13734 | 6921.19065  | 735.62397 | 1.99914  | 0.05767 | 772.59939 | 0.30774 |
| 1750 | 3149.82636 | 19.32622 | 8127.77646  | 460.01301 | 2.44136  | 0.15304 | 304.57744 | 1.92734 |
| 1751 | 3520.09147 | 17.25712 | 7922.47086  | 436.86255 | 1.16166  | 0.06853 | 418.66885 | 0.56995 |
| 1752 | 4702.57667 | 19.19241 | 9856.54113  | 576.73213 | 1.20514  | 0.04825 | 735.94597 | 0.30233 |
| 1753 | 3736.19942 | 11.63999 | 8705.91117  | 615.39561 | 2.48027  | 0.03502 | 607.12204 | 0.57657 |
| 1754 | 3582.89412 | 13.21239 | 5375.56356  | 479.40449 | 0.57523  | 0.04099 | 433.42586 | 0.56956 |
| 1755 | 4768.14172 | 8.14222  | 9217.81207  | 350.48260 | -1.11204 | 0.00353 | 489.12568 | 0.10206 |
| 1756 | 4759.78082 | 18.19809 | 10684.35129 | 562.19478 | 1.71835  | 0.03265 | 730.16632 | 0.35004 |
| 1757 | 3389.68385 | 20.20483 | 8730.85618  | 123.35366 | 4.38417  | 0.01813 | 97.14201  | 0.97978 |
| 1758 | 4877.79597 | 16.86042 | 8589.14117  | 344.34819 | 3.50541  | 0.04825 | 435.00501 | 0.38657 |
| 1759 | 3335.90391 | 24.26017 | 11558.17881 | 678.84364 | 4.34563  | 0.06807 | 606.67335 | 0.74159 |
| 1760 | 4672.87215 | 18.85738 | 12281.44413 | 450.35571 | 5.35950  | 0.04688 | 555.34947 | 0.38740 |
| 1761 | 4762.43640 | 14.79987 | 10467.52476 | 341.97497 | 3.21846  | 0.02459 | 499.17121 | 0.34297 |
| 1762 | 4342.73473 | 16.18714 | 9389.57806  | 340.30018 | 6.28679  | 0.10225 | 446.11790 | 0.46325 |
| 1763 | 4339.09716 | 23.79074 | 10415.57898 | 771.58836 | 3.75188  | 0.03104 | 801.04196 | 0.56797 |
| 1764 | 4293.54136 | 15.05572 | 12164.78119 | 501.24756 | -1.74995 | 0.01862 | 600.07312 | 0.35306 |
| 1765 | 3168.52038 | 20.16637 | 10404.35668 | 436.28885 | 3.65991  | 0.15380 | 237.37237 | 1.29691 |
| 1766 | 4399.10003 | 6.55898  | 7939.53117  | 379.82572 | -1.42542 | 0.00299 | 532.27911 | 0.09602 |
| 1767 | 4895.61584 | 9.52313  | 10173.20677 | 623.47741 | -0.33680 | 0.02713 | 812.41587 | 0.34280 |
| 1768 | 4504.44918 | 20.99718 | 9931.79343  | 432.48695 | 5.59370  | 0.10450 | 507.98363 | 0.51603 |
| 1769 | 4333.82965 | 19.34398 | 6379.70665  | 736.80766 | 2.87551  | 0.06118 | 792.46673 | 0.35637 |

|      |            |          |             |            |          |         |            |         |
|------|------------|----------|-------------|------------|----------|---------|------------|---------|
| 1770 | 4488.63657 | 23.23616 | 7282.00616  | 564.11407  | 6.06502  | 0.12310 | 644.33858  | 0.73918 |
| 1771 | 4146.82872 | 16.37186 | 8962.69537  | 626.57934  | -1.25071 | 0.01808 | 703.20128  | 0.45886 |
| 1772 | 4658.39771 | 16.66216 | 21288.66716 | 51.39919   | -4.35910 | 0.00001 | 9.74490    | 1.65520 |
| 1773 | 3342.98686 | 24.26868 | 11636.87553 | 633.47785  | 3.66590  | 0.06189 | 584.73459  | 0.53292 |
| 1774 | 4576.15539 | 7.77003  | 9012.86813  | 291.33840  | -2.83823 | 0.00386 | 391.97037  | 0.10825 |
| 1775 | 4266.49440 | 23.22441 | 11939.70086 | 713.76038  | 4.00252  | 0.00907 | 871.55696  | 0.11887 |
| 1776 | 4240.95781 | 17.38064 | 7596.19470  | 759.93349  | 0.28269  | 0.02233 | 846.71919  | 0.49383 |
| 1777 | 4686.73272 | 13.56156 | 9656.86063  | 426.74296  | 1.37245  | 0.02111 | 516.65672  | 0.22355 |
| 1778 | 2888.65017 | 15.73807 | 15577.14609 | 305.00561  | 4.08418  | 0.21665 | 224.87950  | 0.84894 |
| 1779 | 4536.90290 | 20.24671 | 20340.46129 | 342.22728  | 6.14356  | 0.11277 | 436.92031  | 0.41620 |
| 1780 | 3277.94760 | 18.66344 | 18669.43078 | 442.63232  | 2.15263  | 0.21830 | 390.07217  | 0.90302 |
| 1781 | 4794.01146 | 10.36402 | 11074.80441 | 589.46052  | 1.47143  | 0.03782 | 744.36976  | 0.41904 |
| 1782 | 3668.79649 | 14.08937 | 9914.36855  | 598.45824  | 2.48067  | 0.07654 | 625.21099  | 0.64885 |
| 1783 | 4431.18674 | 15.58691 | 6451.09616  | 630.13204  | 3.46721  | 0.02426 | 689.83794  | 0.42664 |
| 1784 | 3978.06903 | 10.03624 | 12968.64591 | 187.09932  | -1.49487 | 0.00430 | 201.08359  | 0.26187 |
| 1785 | 4399.44058 | 6.56556  | 8073.30871  | 381.95896  | -1.67637 | 0.00325 | 526.77092  | 0.06434 |
| 1786 | 4975.36257 | 9.89165  | 8926.04799  | 394.07200  | -0.12559 | 0.00743 | 554.49370  | 0.15835 |
| 1787 | 4736.62000 | 21.71247 | 10156.65075 | 450.28989  | 3.79964  | 0.06672 | 561.33280  | 0.50769 |
| 1788 | 4509.77732 | 19.80790 | 7326.98622  | 622.72174  | 2.29431  | 0.06037 | 735.07405  | 0.42536 |
| 1789 | 4855.90270 | 13.74631 | 11579.97549 | 578.08839  | 2.09646  | 0.04562 | 745.40497  | 0.51227 |
| 1790 | 4766.82126 | 18.35674 | 10669.05743 | 676.75616  | 1.84135  | 0.03960 | 843.42930  | 0.33409 |
| 1791 | 4449.10505 | 19.78882 | 8007.86370  | 356.90718  | 4.76553  | 0.08103 | 392.90193  | 0.59261 |
| 1792 | 4145.95310 | 16.43605 | 8938.51766  | 664.37442  | 0.42442  | 0.01985 | 751.76734  | 0.39319 |
| 1793 | 4401.72247 | 6.53973  | 8152.55838  | 386.32435  | -3.45343 | 0.00271 | 514.04211  | 0.13954 |
| 1794 | 4238.39571 | 17.44304 | 7556.99198  | 611.49029  | 0.37605  | 0.02728 | 663.10502  | 0.44871 |
| 1795 | 3577.32174 | 13.36985 | 5214.50342  | 608.18968  | 2.03883  | 0.04027 | 561.23955  | 0.60635 |
| 1796 | 3538.63243 | 9.36291  | 7263.81931  | 582.38440  | 2.73961  | 0.04329 | 502.23490  | 0.70334 |
| 1797 | 4704.61940 | 19.16978 | 9934.06381  | 651.64566  | 1.54264  | 0.04258 | 828.72615  | 0.27149 |
| 1798 | 3503.34260 | 15.37147 | 11545.34839 | 496.91509  | 1.51912  | 0.09271 | 446.07309  | 0.47507 |
| 1799 | 3735.16197 | 11.58446 | 8707.24808  | 621.21318  | 0.90749  | 0.03184 | 642.03024  | 0.58804 |
| 1800 | 4843.69269 | 12.56031 | 13050.72923 | 390.47200  | 3.32086  | 0.02204 | 547.29883  | 0.30677 |
| 1801 | 4146.90675 | 16.36859 | 9046.39082  | 573.95726  | -1.19299 | 0.01816 | 633.37182  | 0.46237 |
| 1802 | 4920.71602 | 19.95471 | 11509.54454 | 404.63284  | 2.76498  | 0.05251 | 548.00986  | 0.39414 |
| 1803 | 4090.14204 | 19.87441 | 14943.85670 | 86.71938   | 2.98454  | 0.01102 | 50.65831   | 0.56290 |
| 1804 | 4565.65193 | 17.95538 | 8196.59200  | 508.00214  | 2.20114  | 0.02723 | 692.65483  | 0.31362 |
| 1805 | 4033.50081 | 25.73454 | 8832.26177  | 723.55892  | 2.54094  | 0.01794 | 707.87337  | 0.45592 |
| 1806 | 4692.80035 | 18.27406 | 16549.07659 | 439.86068  | 4.90821  | 0.03339 | 581.22759  | 0.13019 |
| 1807 | 3773.49996 | 12.03726 | 9412.52743  | 579.77488  | -0.47486 | 0.03060 | 572.24416  | 0.49302 |
| 1808 | 5088.11749 | 9.97662  | 16724.66537 | 117.94033  | 0.25270  | 0.00221 | 136.42239  | 0.27655 |
| 1809 | 4792.05762 | 15.79917 | 7403.51362  | 440.75526  | 2.63489  | 0.01393 | 642.62727  | 0.19561 |
| 1810 | 3780.33865 | 24.18367 | 10997.10001 | 716.98462  | 3.30701  | 0.04023 | 698.05499  | 0.77889 |
| 1811 | 5024.41954 | 18.12175 | 10147.88739 | 433.35966  | 1.57231  | 0.01531 | 620.00422  | 0.24551 |
| 1812 | 3534.36002 | 16.72411 | 17248.87963 | 379.53268  | 0.91353  | 0.14891 | 340.76527  | 0.63377 |
| 1813 | 4692.90007 | 19.10975 | 9868.18470  | 625.80852  | 2.48870  | 0.04993 | 777.47422  | 0.31105 |
| 1814 | 3385.26375 | 24.41927 | 12008.86008 | 454.00438  | 2.84608  | 0.05267 | 339.42953  | 0.62897 |
| 1815 | 4911.94142 | 13.67217 | 8084.23490  | 522.79856  | 3.49809  | 0.01774 | 758.75089  | 0.21138 |
| 1816 | 4528.43241 | 20.06875 | 24799.24293 | 303.05586  | 5.78234  | 0.11747 | 359.17172  | 0.33759 |
| 1817 | 3572.91898 | 17.64544 | 7377.11628  | 419.46026  | 0.52305  | 0.08698 | 359.18035  | 0.82632 |
| 1818 | 3985.10330 | 16.78599 | 5618.04304  | 455.64564  | -2.82490 | 0.02583 | 526.51349  | 0.79296 |
| 1819 | 4831.40032 | 14.36993 | 11282.24633 | 390.68824  | 3.82789  | 0.03119 | 585.07098  | 0.24393 |
| 1820 | 4238.55197 | 17.41425 | 7575.19902  | 673.60631  | -0.83979 | 0.02239 | 773.95124  | 0.52368 |
| 1821 | 4239.36765 | 24.67965 | 8281.35457  | 697.21755  | 1.42520  | 0.02028 | 829.04462  | 0.33721 |
| 1822 | 3703.41226 | 7.83243  | 6095.44965  | 366.89758  | -1.67101 | 0.02050 | 368.19474  | 0.50574 |
| 1823 | 3127.54606 | 15.56831 | 6661.73941  | 384.93088  | 1.62434  | 0.01144 | 356.85898  | 0.25331 |
| 1824 | 4295.48043 | 15.22003 | 12166.57354 | 454.97451  | -0.30384 | 0.02114 | 554.11029  | 0.26565 |
| 1825 | 2896.13626 | 16.41610 | 14624.66831 | 379.55377  | 4.71441  | 0.18308 | 320.78930  | 0.63799 |
| 1826 | 4281.60913 | 14.16515 | 6882.44088  | 568.79550  | -2.71593 | 0.02044 | 654.51704  | 0.47014 |
| 1827 | 3397.65998 | 11.74448 | 7560.05074  | 489.72155  | 2.16389  | 0.07660 | 369.85846  | 0.71218 |
| 1828 | 4372.73710 | 20.43464 | 9933.80395  | 492.70218  | 2.71006  | 0.04262 | 547.76239  | 0.46620 |
| 1829 | 4660.07435 | 19.54902 | 11889.90231 | 360.47744  | 5.22780  | 0.09686 | 464.48717  | 0.49498 |
| 1830 | 5044.99237 | 13.48904 | 8839.72083  | 446.93062  | 2.09005  | 0.01370 | 658.21769  | 0.20445 |
| 1831 | 4258.39552 | 23.31779 | 12461.67728 | 1010.55041 | 5.77546  | 0.01221 | 1158.20089 | 0.12895 |
| 1832 | 4281.57471 | 14.17413 | 6879.70082  | 523.39184  | -3.46879 | 0.02080 | 597.02051  | 0.45002 |
| 1833 | 5109.75140 | 11.56153 | 12919.30136 | 62.67242   | -1.01049 | 0.00060 | 43.15371   | 0.46416 |
| 1834 | 2491.71017 | 14.35835 | 3674.22508  | 340.35894  | 6.19880  | 0.31425 | 307.28377  | 0.75476 |
| 1835 | 4335.74641 | 17.15698 | 8154.53578  | 620.06106  | 3.22003  | 0.05094 | 658.35949  | 0.32212 |
| 1836 | 4877.74568 | 16.85312 | 8597.34385  | 336.25638  | 3.55273  | 0.05691 | 437.89434  | 0.39561 |
| 1837 | 4724.89045 | 19.34750 | 9903.36736  | 517.49838  | 1.57777  | 0.03943 | 648.46152  | 0.28439 |
| 1838 | 3782.48549 | 24.19603 | 11004.32081 | 718.75855  | 3.06275  | 0.03917 | 676.83883  | 0.75687 |
| 1839 | 3332.33509 | 24.24838 | 11551.78342 | 510.59256  | 3.92984  | 0.06579 | 413.89247  | 0.59219 |
| 1840 | 4070.69659 | 25.71526 | 8932.72772  | 675.02402  | 2.06669  | 0.01176 | 698.90026  | 0.43878 |

|      |            |          |             |           |          |         |            |         |
|------|------------|----------|-------------|-----------|----------|---------|------------|---------|
| 1841 | 4617.25094 | 21.71256 | 15564.31522 | 575.61722 | 5.66652  | 0.07901 | 689.95217  | 0.53055 |
| 1842 | 3173.97845 | 16.75009 | 9643.41480  | 667.14162 | 3.29624  | 0.23902 | 634.40440  | 0.61490 |
| 1843 | 4566.62984 | 17.96595 | 8204.88745  | 367.12669 | 2.87188  | 0.02761 | 483.37722  | 0.29152 |
| 1844 | 3139.82507 | 16.45579 | 9459.45420  | 535.99685 | 3.34430  | 0.22810 | 502.79119  | 0.61923 |
| 1845 | 4609.46151 | 18.88539 | 8427.93711  | 399.35574 | 5.13404  | 0.03771 | 498.68771  | 0.32747 |
| 1846 | 2570.07232 | 15.58927 | 11178.16660 | 439.23941 | 5.21712  | 0.30128 | 456.95118  | 0.14236 |
| 1847 | 4678.80243 | 21.50127 | 9182.51245  | 495.41924 | 3.65498  | 0.05791 | 602.22860  | 0.52011 |
| 1848 | 3736.16920 | 11.52577 | 8788.93674  | 483.68364 | -0.27010 | 0.03134 | 450.80364  | 0.60834 |
| 1849 | 4973.25279 | 8.59279  | 8943.24082  | 261.66257 | 0.74773  | 0.00402 | 378.19116  | 0.09673 |
| 1850 | 3915.04697 | 12.93172 | 12079.90781 | 467.09001 | -0.32067 | 0.03474 | 548.95303  | 0.44522 |
| 1851 | 4441.06261 | 21.73221 | 7591.24995  | 424.36784 | 2.67486  | 0.03019 | 524.14123  | 0.30782 |
| 1852 | 4709.43742 | 19.22920 | 12649.37061 | 266.03783 | 3.33230  | 0.08140 | 321.76426  | 0.57274 |
| 1853 | 4439.29876 | 20.41349 | 8222.16131  | 590.72083 | 3.96988  | 0.11235 | 682.84496  | 0.55046 |
| 1854 | 4560.73090 | 17.94549 | 8155.52891  | 433.98043 | 3.42585  | 0.03134 | 568.44490  | 0.22860 |
| 1855 | 4886.45420 | 9.35957  | 12722.06296 | 492.01387 | 1.60020  | 0.01866 | 729.09447  | 0.25062 |
| 1856 | 4012.32489 | 9.40914  | 9083.74696  | 316.26730 | -2.01132 | 0.00702 | 381.36933  | 0.23483 |
| 1857 | 4850.44900 | 15.84016 | 8850.00269  | 431.39206 | 3.62845  | 0.02218 | 648.82949  | 0.24518 |
| 1858 | 5199.97758 | 14.29036 | 9609.39666  | 61.20100  | -3.64400 | 0.00021 | 59.98404   | 1.85751 |
| 1859 | 4677.68681 | 10.83133 | 16705.07478 | 111.03413 | 2.78025  | 0.01212 | 107.78225  | 0.35740 |
| 1860 | 4373.40072 | 20.43091 | 9917.30420  | 545.66170 | 3.00142  | 0.04872 | 599.40272  | 0.41846 |
| 1861 | 3847.43564 | 20.39001 | 12355.16530 | 391.31353 | -1.44742 | 0.08275 | 376.43981  | 0.87643 |
| 1862 | 4266.11294 | 16.18294 | 7771.40533  | 789.15583 | 1.89801  | 0.05343 | 847.40683  | 0.50493 |
| 1863 | 3881.28684 | 12.52712 | 13548.62858 | 145.95896 | -2.74585 | 0.00454 | 146.40132  | 0.73727 |
| 1864 | 3660.76078 | 23.93494 | 10538.02217 | 857.06252 | 7.18403  | 0.06426 | 610.30471  | 1.14032 |
| 1865 | 3130.64894 | 15.88796 | 6808.50400  | 286.99327 | 1.06260  | 0.01135 | 227.29201  | 0.29529 |
| 1866 | 4145.59047 | 16.44984 | 8932.19051  | 603.45841 | 0.33784  | 0.02089 | 619.92322  | 0.38467 |
| 1867 | 4547.76442 | 16.08028 | 11316.92877 | 347.32210 | 4.94509  | 0.07400 | 480.08841  | 0.38729 |
| 1868 | 3919.80223 | 18.53634 | 6913.51140  | 527.33219 | 5.98180  | 0.05765 | 430.73014  | 0.63856 |
| 1869 | 4551.87687 | 17.76793 | 8421.19418  | 537.47788 | 2.26606  | 0.02695 | 703.04367  | 0.30556 |
| 1870 | 3568.09549 | 17.64325 | 7378.31550  | 470.90215 | -0.04521 | 0.09186 | 470.08144  | 0.61831 |
| 1871 | 3859.37598 | 24.40239 | 6385.58467  | 946.80079 | 3.28565  | 0.02255 | 897.35896  | 0.77948 |
| 1872 | 5012.84409 | 10.00107 | 9472.53904  | 213.28134 | 0.66561  | 0.00460 | 300.20037  | 0.15265 |
| 1873 | 3532.83516 | 15.23906 | 11897.44743 | 496.82605 | 0.09833  | 0.07080 | 465.55697  | 0.63433 |
| 1874 | 4917.92152 | 10.76224 | 8766.34088  | 153.53950 | 1.28436  | 0.00569 | 202.27945  | 0.09692 |
| 1875 | 4463.32689 | 20.99921 | 9401.19818  | 581.36742 | 3.19264  | 0.04444 | 752.26434  | 0.37409 |
| 1876 | 4572.63058 | 10.31309 | 9284.73857  | 532.75858 | -1.18032 | 0.03657 | 685.31801  | 0.21222 |
| 1877 | 2480.12780 | 15.14041 | 2976.60360  | 459.17685 | 5.61912  | 0.23225 | 561.89532  | 1.40825 |
| 1878 | 4430.51860 | 14.64667 | 6233.87194  | 563.39446 | 3.46908  | 0.02581 | 622.63010  | 0.32804 |
| 1879 | 3130.23769 | 15.58894 | 6657.95115  | 327.37277 | 2.99231  | 0.01526 | 260.76588  | 0.24716 |
| 1880 | 3224.17854 | 14.51762 | 10066.20148 | 453.68318 | 2.57776  | 0.07466 | 473.34044  | 0.45246 |
| 1881 | 4471.37662 | 20.44464 | 13717.34397 | 509.60356 | 5.89610  | 0.10433 | 611.26541  | 0.46224 |
| 1882 | 3752.55614 | 20.74492 | 13548.11786 | 96.20796  | 2.71546  | 0.01381 | 58.12503   | 1.21391 |
| 1883 | 3374.62029 | 20.20445 | 10364.94360 | 149.37633 | 4.15179  | 0.01855 | 120.90623  | 1.02253 |
| 1884 | 3706.21702 | 24.57793 | 6223.05279  | 627.42474 | 2.50219  | 0.04099 | 519.20665  | 0.47770 |
| 1885 | 3474.99573 | 13.93031 | 7310.88520  | 650.42785 | 2.61501  | 0.06535 | 605.46059  | 0.58632 |
| 1886 | 2566.18721 | 15.53827 | 10734.25465 | 466.10771 | 5.65870  | 0.29135 | 455.13224  | 0.80046 |
| 1887 | 3708.13268 | 24.59993 | 6217.31886  | 697.12789 | 3.24983  | 0.04961 | 643.46471  | 0.47538 |
| 1888 | 3931.33405 | 18.66634 | 6896.74388  | 786.93822 | 6.36049  | 0.05780 | 687.11605  | 0.51803 |
| 1889 | 4676.85243 | 18.87601 | 12285.78377 | 456.52538 | 6.10121  | 0.03701 | 572.83881  | 0.38199 |
| 1890 | 4833.28710 | 14.43131 | 10644.35535 | 381.14757 | 3.96877  | 0.03433 | 575.28893  | 0.19152 |
| 1891 | 4024.10327 | 13.32536 | 15718.44023 | 125.72493 | -0.76229 | 0.00225 | 118.77276  | 0.57011 |
| 1892 | 4845.72295 | 15.78220 | 8826.21069  | 452.34670 | 2.76365  | 0.02709 | 663.56439  | 0.24756 |
| 1893 | 3715.23833 | 24.60599 | 6220.58789  | 570.33123 | 2.81171  | 0.05172 | 460.22135  | 0.47437 |
| 1894 | 4536.95859 | 15.87322 | 11215.85209 | 191.22464 | 5.06585  | 0.08555 | 221.68661  | 0.33811 |
| 1895 | 3736.35998 | 13.08547 | 13566.56829 | 177.21846 | -0.77718 | 0.00309 | 193.25644  | 0.28303 |
| 1896 | 4455.12335 | 19.56787 | 5704.37188  | 507.61621 | 3.21236  | 0.03848 | 577.51881  | 0.41581 |
| 1897 | 2552.77939 | 15.42045 | 4086.62961  | 523.83740 | 5.44260  | 0.26532 | 478.55288  | 0.86574 |
| 1898 | 4973.32777 | 16.92576 | 10637.74291 | 56.08001  | -1.28077 | 0.00066 | 43.98219   | 1.15630 |
| 1899 | 3668.44632 | 14.08798 | 9906.89159  | 433.32823 | 1.41655  | 0.07649 | 394.36126  | 0.65237 |
| 1900 | 4852.84427 | 13.67837 | 11914.96831 | 475.00385 | 2.05095  | 0.03871 | 600.46025  | 0.45987 |
| 1901 | 4705.20940 | 11.10383 | 15922.64689 | 180.01828 | 1.44727  | 0.00527 | 246.88270  | 0.20130 |
| 1902 | 4201.16641 | 23.78347 | 8498.67196  | 779.29256 | 2.04623  | 0.04972 | 864.93516  | 0.58990 |
| 1903 | 4399.81606 | 6.57874  | 7890.73582  | 411.93994 | -2.03702 | 0.00357 | 567.71162  | 0.06730 |
| 1904 | 3263.95974 | 19.91607 | 13584.59862 | 371.95450 | 1.99008  | 0.17592 | 291.15164  | 0.92700 |
| 1905 | 4178.82647 | 18.98056 | 8273.79542  | 660.56953 | 1.86353  | 0.03202 | 687.96518  | 0.54477 |
| 1906 | 3128.00730 | 18.09394 | 10233.36091 | 552.94907 | 3.91741  | 0.19406 | 507.21468  | 0.87044 |
| 1907 | 4912.17305 | 13.67939 | 8077.92156  | 419.02988 | 3.29971  | 0.01681 | 624.59672  | 0.21854 |
| 1908 | 4675.07639 | 10.76092 | 16820.17627 | 100.68659 | 0.58342  | 0.00909 | 91.82319   | 0.41898 |
| 1909 | 4970.12685 | 9.93962  | 8512.18561  | 357.15795 | 2.57609  | 0.00955 | 492.31398  | 0.16527 |
| 1910 | 4256.07875 | 23.31128 | 12252.82823 | 887.77469 | 5.64565  | 0.01277 | 1065.89072 | 0.12984 |
| 1911 | 4790.76660 | 10.28749 | 11050.81081 | 564.48106 | 4.26160  | 0.03927 | 730.70141  | 0.44019 |

|      |            |          |             |           |          |         |           |         |
|------|------------|----------|-------------|-----------|----------|---------|-----------|---------|
| 1912 | 4628.66218 | 22.26822 | 9847.50054  | 677.93142 | 1.92616  | 0.03694 | 852.04099 | 0.39492 |
| 1913 | 4827.89799 | 9.74832  | 7647.24727  | 154.99623 | 0.39680  | 0.00591 | 195.05081 | 0.28467 |
| 1914 | 4691.68372 | 15.37352 | 14157.31866 | 426.97180 | 3.84040  | 0.06465 | 608.66949 | 0.34772 |
| 1915 | 4340.46006 | 18.29635 | 6903.21030  | 387.53045 | 3.62288  | 0.03109 | 378.03054 | 0.55303 |
| 1916 | 3175.26907 | 16.06619 | 9641.41960  | 492.72040 | 3.76617  | 0.22716 | 380.82603 | 0.71197 |
| 1917 | 4401.83117 | 6.54438  | 8154.32684  | 344.27244 | -4.13211 | 0.00282 | 464.05228 | 0.11195 |
| 1918 | 4290.83609 | 18.11037 | 6899.19347  | 740.50750 | 2.19652  | 0.05149 | 812.43072 | 0.44750 |
| 1919 | 2899.57929 | 19.98859 | 7789.85192  | 589.76375 | 5.44142  | 0.27237 | 471.68656 | 1.10120 |
| 1920 | 4574.94182 | 7.67530  | 8849.91518  | 277.97673 | -1.96797 | 0.00405 | 364.94721 | 0.08260 |
| 1921 | 2895.75429 | 16.57902 | 14328.84120 | 391.70677 | 4.46236  | 0.23412 | 274.79145 | 0.80431 |
| 1922 | 4976.12206 | 10.31234 | 9102.08737  | 331.01087 | 0.60229  | 0.00420 | 504.88493 | 0.16732 |
| 1923 | 2908.23804 | 16.23018 | 14903.74513 | 386.90579 | 4.76500  | 0.20709 | 299.92179 | 0.71611 |
| 1924 | 4658.63839 | 19.54489 | 12708.28810 | 485.44237 | 4.12804  | 0.09396 | 667.90610 | 0.48078 |
| 1925 | 3765.97887 | 11.90250 | 9260.10359  | 568.66975 | 1.44861  | 0.03307 | 527.37243 | 0.63171 |
| 1926 | 4821.29329 | 20.94502 | 7797.19758  | 535.99985 | 2.13002  | 0.04376 | 658.59386 | 0.40670 |
| 1927 | 4317.37415 | 18.26510 | 7687.37797  | 436.19377 | 7.82716  | 0.11079 | 517.94835 | 0.40990 |
| 1928 | 3379.96401 | 20.40200 | 10009.84523 | 124.88616 | 3.53224  | 0.01993 | 91.82337  | 0.96288 |
| 1929 | 4684.60759 | 13.63554 | 9873.54443  | 415.10373 | 2.74811  | 0.02099 | 503.52718 | 0.22346 |
| 1930 | 4086.50704 | 18.94734 | 6720.11404  | 739.38722 | 3.80025  | 0.06743 | 752.51996 | 0.60532 |
| 1931 | 3524.91827 | 17.31113 | 7947.23167  | 401.03011 | 1.53802  | 0.07036 | 386.32283 | 0.77663 |
| 1932 | 4420.00561 | 17.91234 | 7193.70907  | 508.32510 | 2.21241  | 0.03746 | 568.38370 | 0.33793 |
| 1933 | 4610.45527 | 22.32715 | 8661.21715  | 602.99080 | 2.88228  | 0.05022 | 732.36222 | 0.37125 |
| 1934 | 4151.20234 | 13.07830 | 12729.41476 | 242.34382 | 0.74846  | 0.01004 | 286.22045 | 0.23132 |
| 1935 | 3380.08528 | 9.61419  | 6911.97090  | 491.74150 | 2.86138  | 0.07066 | 530.32704 | 0.59229 |
| 1936 | 5044.06937 | 13.46218 | 8813.05268  | 351.26389 | 1.07467  | 0.01338 | 519.37146 | 0.19588 |
| 1937 | 4630.39973 | 7.65575  | 16398.89086 | 119.81807 | -3.74423 | 0.00002 | 148.37525 | 0.07862 |
| 1938 | 4979.97235 | 9.58540  | 8803.12034  | 256.22751 | -0.53600 | 0.00768 | 338.14129 | 0.19685 |
| 1939 | 4336.54154 | 16.12068 | 9300.74444  | 452.35196 | 5.98282  | 0.09662 | 618.22555 | 0.42914 |
| 1940 | 4080.81801 | 21.82462 | 8916.85446  | 715.10904 | 3.00865  | 0.03876 | 718.96077 | 0.51839 |
| 1941 | 2924.28427 | 19.98230 | 8221.66856  | 546.02459 | 4.97616  | 0.28532 | 385.78399 | 1.07196 |
| 1942 | 4423.63049 | 11.43813 | 8406.26626  | 578.41597 | -1.71001 | 0.01039 | 711.77927 | 0.28922 |
| 1943 | 3532.07676 | 15.28122 | 11883.13967 | 446.62065 | 1.49863  | 0.07163 | 390.94148 | 0.48837 |
| 1944 | 4887.86470 | 9.39219  | 12628.85498 | 439.36179 | 3.47616  | 0.02178 | 655.75944 | 0.19764 |
| 1945 | 4335.49055 | 18.28841 | 6885.89445  | 630.78959 | 4.01445  | 0.03643 | 689.43022 | 0.51371 |
| 1946 | 3631.56436 | 23.24768 | 5182.86105  | 720.75529 | 7.44868  | 0.07085 | 749.71547 | 0.51849 |
| 1947 | 3773.57493 | 12.03631 | 9411.32606  | 533.42145 | 3.00989  | 0.03026 | 520.85564 | 0.49315 |
| 1948 | 4847.43029 | 13.60617 | 12154.64450 | 332.93834 | 0.68579  | 0.03524 | 397.96130 | 0.46817 |
| 1949 | 3770.05618 | 9.64750  | 8363.19150  | 434.49993 | 0.62981  | 0.05536 | 383.95517 | 0.56743 |
| 1950 | 3987.02940 | 22.94683 | 7941.11763  | 763.01981 | 2.13886  | 0.03239 | 817.48586 | 0.53326 |
| 1951 | 4668.69139 | 16.53711 | 18088.55319 | 467.11504 | 3.63786  | 0.09199 | 654.60644 | 0.44651 |
| 1952 | 4543.87343 | 15.89357 | 11137.45373 | 381.09201 | 6.13898  | 0.08859 | 527.38306 | 0.30300 |
| 1953 | 4198.26158 | 21.01967 | 10548.56973 | 750.61111 | 2.52798  | 0.03266 | 802.05663 | 0.53869 |
| 1954 | 4958.16864 | 6.64867  | 9534.53057  | 343.68592 | -2.87728 | 0.00667 | 492.33961 | 0.18943 |
| 1955 | 4058.60968 | 9.19573  | 11416.06704 | 165.31825 | -1.29360 | 0.00614 | 201.51543 | 0.12547 |
| 1956 | 4843.78145 | 12.68346 | 14501.42592 | 455.82412 | 3.64312  | 0.02557 | 633.03596 | 0.23155 |
| 1957 | 4834.25418 | 14.44378 | 11292.33667 | 280.99402 | 3.18024  | 0.03099 | 422.40421 | 0.23607 |
| 1958 | 3533.91199 | 15.25542 | 11900.56414 | 408.08511 | 0.57967  | 0.07291 | 346.05896 | 0.55659 |
| 1959 | 3144.31787 | 16.11848 | 6813.02471  | 251.61555 | 0.97968  | 0.01137 | 176.94871 | 0.32468 |
| 1960 | 4782.35500 | 16.50824 | 9773.67891  | 569.27066 | -0.32582 | 0.02923 | 743.05080 | 0.31416 |
| 1961 | 4637.05359 | 16.97585 | 10100.61028 | 293.77815 | 4.23479  | 0.05865 | 390.70485 | 0.52855 |
| 1962 | 3679.39224 | 7.65563  | 5915.69874  | 418.93902 | -0.50652 | 0.02589 | 403.51591 | 0.52940 |
| 1963 | 4705.44906 | 19.15366 | 9946.11613  | 457.04521 | 0.64526  | 0.04141 | 585.32441 | 0.31231 |
| 1964 | 4058.69073 | 9.06353  | 11576.71343 | 272.20969 | -1.51681 | 0.00566 | 384.97819 | 0.11030 |
| 1965 | 4398.69770 | 6.54049  | 7818.36891  | 411.42818 | -0.64305 | 0.00391 | 524.23179 | 0.06702 |
| 1966 | 3702.50440 | 24.98696 | 13269.42727 | 83.38585  | 4.19602  | 0.01063 | 32.91258  | 1.23459 |
| 1967 | 3901.01228 | 13.49470 | 11261.41725 | 342.61482 | -0.84278 | 0.03213 | 356.71086 | 0.41290 |
| 1968 | 4892.96919 | 9.46369  | 10133.51629 | 570.93009 | 0.19919  | 0.03090 | 731.91662 | 0.38137 |
| 1969 | 4173.17325 | 18.96154 | 8206.67071  | 691.07695 | 1.74429  | 0.03386 | 734.37580 | 0.45025 |
| 1970 | 3362.19136 | 7.36602  | 13436.40684 | 317.99376 | 2.05784  | 0.03391 | 266.36134 | 0.48692 |
| 1971 | 4449.09419 | 20.33997 | 16240.15864 | 708.32083 | 3.49915  | 0.01797 | 871.45351 | 0.27486 |
| 1972 | 3745.53900 | 12.99291 | 13658.21793 | 136.14765 | -0.45855 | 0.00336 | 128.71678 | 0.31750 |
| 1973 | 4913.59150 | 13.69463 | 8019.09564  | 420.03190 | 3.79561  | 0.01853 | 621.48949 | 0.18387 |
| 1974 | 3501.70850 | 15.32634 | 11503.54208 | 422.53975 | 2.26684  | 0.09165 | 360.25929 | 0.51296 |
| 1975 | 5010.79425 | 6.81276  | 11176.83815 | 265.59526 | -4.46413 | 0.00104 | 396.37773 | 0.03900 |
| 1976 | 4873.52677 | 7.68998  | 9878.05459  | 406.90785 | 0.00916  | 0.00845 | 567.23361 | 0.22949 |
| 1977 | 4508.29268 | 23.37620 | 7383.42208  | 371.38937 | 6.10614  | 0.12901 | 400.06762 | 0.62479 |
| 1978 | 4895.19774 | 9.51175  | 10014.67262 | 511.11225 | -0.55565 | 0.02332 | 682.93210 | 0.39014 |
| 1979 | 4432.52418 | 14.72838 | 6183.86665  | 643.94852 | 3.25444  | 0.02401 | 723.59851 | 0.33868 |
| 1980 | 4707.15582 | 11.03090 | 15927.43133 | 98.66365  | 2.99301  | 0.00615 | 95.33086  | 0.23037 |
| 1981 | 4710.60718 | 17.92511 | 16204.87670 | 402.39549 | 2.42284  | 0.02535 | 536.47688 | 0.20930 |
| 1982 | 3178.20274 | 15.87250 | 12198.98076 | 362.36417 | 3.27263  | 0.10521 | 267.91673 | 0.65829 |



|      |            |          |             |            |          |         |            |         |
|------|------------|----------|-------------|------------|----------|---------|------------|---------|
| 1983 | 4778.95763 | 10.37852 | 11832.26784 | 518.53167  | -0.14107 | 0.01322 | 681.36792  | 0.19587 |
| 1984 | 4194.79370 | 21.01969 | 10517.77192 | 853.09449  | 2.36824  | 0.03415 | 837.94882  | 0.54361 |
| 1985 | 4975.62280 | 10.31660 | 8720.98720  | 270.39260  | 2.35517  | 0.00479 | 405.17776  | 0.12587 |
| 1986 | 4449.47870 | 19.78124 | 7948.66894  | 416.85136  | 6.42736  | 0.10795 | 478.66996  | 0.58185 |
| 1987 | 3171.52843 | 15.83297 | 12149.01506 | 362.18697  | 3.99508  | 0.10278 | 245.38773  | 0.66265 |
| 1988 | 4890.03598 | 9.33682  | 10184.62113 | 511.89749  | -1.61001 | 0.02295 | 665.05066  | 0.41314 |
| 1989 | 4689.34035 | 18.26059 | 16674.22420 | 377.24761  | 3.74161  | 0.02981 | 505.24420  | 0.16576 |
| 1990 | 3669.39735 | 14.09320 | 9919.67507  | 455.86249  | 1.40045  | 0.06724 | 454.94513  | 0.65924 |
| 1991 | 3430.95514 | 8.14495  | 12948.27913 | 454.27712  | 2.14652  | 0.03827 | 477.47928  | 0.41246 |
| 1992 | 3735.72913 | 11.61337 | 8713.10728  | 517.96660  | 0.47318  | 0.02917 | 506.48231  | 0.59399 |
| 1993 | 4982.50110 | 17.75270 | 8860.24076  | 698.03169  | 1.65690  | 0.02426 | 902.29795  | 0.30219 |
| 1994 | 4233.88123 | 14.84320 | 14629.66025 | 84.68467   | -2.10929 | 0.00241 | 70.71950   | 0.97598 |
| 1995 | 4690.83134 | 18.25848 | 16551.71099 | 379.35528  | 4.00223  | 0.03332 | 502.68466  | 0.14021 |
| 1996 | 4708.18580 | 15.76925 | 11409.86358 | 431.67856  | 5.15892  | 0.05005 | 565.46791  | 0.38821 |
| 1997 | 3341.60507 | 24.29024 | 11608.74252 | 610.25161  | 4.03722  | 0.06125 | 535.47750  | 0.72853 |
| 1998 | 4579.46109 | 7.96277  | 8842.29482  | 260.07700  | -3.37776 | 0.00564 | 333.40088  | 0.16243 |
| 1999 | 4139.69898 | 12.88328 | 12626.56436 | 307.62880  | -0.95194 | 0.00596 | 413.89022  | 0.12895 |
| 2000 | 4945.31436 | 13.15064 | 9380.40123  | 396.26802  | 2.06069  | 0.00984 | 600.55493  | 0.19338 |
| 2001 | 5003.01635 | 7.78236  | 14888.72328 | 170.74725  | -1.40792 | 0.00186 | 245.26983  | 0.08520 |
| 2002 | 3679.55748 | 7.67637  | 5910.10523  | 385.18818  | -1.18101 | 0.02760 | 409.57971  | 0.47714 |
| 2003 | 4768.26348 | 18.38146 | 10680.40596 | 551.11437  | 2.51655  | 0.03749 | 692.98326  | 0.35124 |
| 2004 | 4367.34622 | 18.86190 | 9575.38897  | 518.60902  | 2.31167  | 0.04683 | 595.27279  | 0.40148 |
| 2005 | 4844.76674 | 15.30573 | 11128.09600 | 433.66565  | 3.31410  | 0.02620 | 631.61979  | 0.32736 |
| 2006 | 4237.84009 | 23.40817 | 13335.30303 | 855.09208  | 4.02043  | 0.01057 | 974.17557  | 0.16004 |
| 2007 | 2543.81651 | 16.87107 | 3561.15778  | 451.87378  | 5.19373  | 0.09537 | 501.57955  | 2.03601 |
| 2008 | 3412.90801 | 11.53468 | 7644.15180  | 562.28542  | 2.00308  | 0.07394 | 473.17147  | 0.66687 |
| 2009 | 3401.00337 | 9.51302  | 6817.39761  | 291.86944  | 1.14465  | 0.04983 | 239.35350  | 0.62991 |
| 2010 | 4725.26707 | 19.36253 | 9896.37758  | 669.47804  | 1.04568  | 0.03756 | 869.04435  | 0.27165 |
| 2011 | 4433.39094 | 14.63973 | 6179.49031  | 623.64200  | 4.18772  | 0.02886 | 690.58656  | 0.28639 |
| 2012 | 4425.55463 | 11.54220 | 8405.98398  | 550.55820  | -2.58248 | 0.01120 | 690.15389  | 0.27577 |
| 2013 | 4202.08842 | 21.00357 | 10542.74567 | 704.82279  | 2.78010  | 0.03982 | 727.72238  | 0.52256 |
| 2014 | 3775.17191 | 12.07654 | 9408.20081  | 640.68087  | -0.01256 | 0.02983 | 645.88569  | 0.49637 |
| 2015 | 3563.65710 | 23.31346 | 9305.56032  | 1103.50946 | 8.22453  | 0.09095 | 847.02133  | 1.23771 |
| 2016 | 2549.94444 | 14.25353 | 3730.72395  | 478.18300  | 5.54191  | 0.29418 | 511.61329  | 1.94694 |
| 2017 | 4649.53690 | 20.88914 | 8748.58502  | 531.54431  | 3.65264  | 0.09153 | 646.79222  | 0.50584 |
| 2018 | 3433.50713 | 8.13545  | 13731.79505 | 387.23600  | 1.69506  | 0.03247 | 425.17472  | 0.48689 |
| 2019 | 4004.93661 | 9.93387  | 9312.43393  | 279.71957  | -1.30665 | 0.00985 | 336.73303  | 0.16705 |
| 2020 | 2494.64286 | 15.12113 | 4130.91047  | 474.06826  | 5.75922  | 0.33563 | 537.41284  | 0.78424 |
| 2021 | 3575.18242 | 17.65325 | 7360.44415  | 445.71004  | -0.39352 | 0.09156 | 396.03280  | 0.83134 |
| 2022 | 4057.86060 | 25.70370 | 8936.72903  | 768.90853  | 2.10695  | 0.01374 | 858.17348  | 0.41662 |
| 2023 | 4416.38585 | 17.87711 | 7181.77647  | 510.30106  | 2.46320  | 0.04990 | 581.87686  | 0.45678 |
| 2024 | 3222.05745 | 14.52618 | 10055.01521 | 380.39944  | 2.83851  | 0.08471 | 379.93374  | 0.46777 |
| 2025 | 4069.85506 | 25.71210 | 8960.61187  | 809.45965  | 2.91572  | 0.01122 | 857.80510  | 0.45314 |
| 2026 | 4340.05310 | 17.15539 | 8219.66769  | 635.55465  | 3.45559  | 0.03925 | 684.37194  | 0.37466 |
| 2027 | 4899.21362 | 13.48903 | 8172.37316  | 367.47460  | 1.75170  | 0.01591 | 532.70563  | 0.23564 |
| 2028 | 3214.27736 | 19.23839 | 13146.73561 | 489.64079  | 2.94519  | 0.19757 | 464.81416  | 0.73299 |
| 2029 | 4281.15999 | 14.24383 | 6815.41906  | 456.98185  | -1.79931 | 0.02188 | 524.35271  | 0.43062 |
| 2030 | 4509.12127 | 11.37927 | 14972.64232 | 78.58572   | -2.32280 | 0.00024 | 64.38248   | 1.33548 |
| 2031 | 3616.71149 | 13.29142 | 29798.29834 | 266.76994  | 0.80284  | 0.01521 | 328.62842  | 0.22763 |
| 2032 | 4674.97076 | 18.88689 | 12286.97460 | 615.63360  | 4.85005  | 0.04780 | 763.96660  | 0.38296 |
| 2033 | 4457.53006 | 19.56325 | 5694.12025  | 544.94217  | 3.90265  | 0.04130 | 610.15427  | 0.39603 |
| 2034 | 3857.57461 | 24.00573 | 12312.08430 | 761.73533  | 5.58823  | 0.01635 | 722.58287  | 0.06939 |
| 2035 | 3418.11711 | 24.12996 | 11287.49275 | 1436.97746 | 10.44677 | 0.17300 | 1008.79141 | 1.98583 |
| 2036 | 3695.96435 | 14.23650 | 10442.67592 | 450.68733  | -0.85833 | 0.05398 | 425.45687  | 0.63460 |
| 2037 | 4373.20707 | 20.50088 | 9900.99432  | 596.43195  | 1.71362  | 0.04373 | 691.32068  | 0.42415 |
| 2038 | 2982.18147 | 24.86666 | 6955.45837  | 506.99221  | 6.47308  | 0.16156 | 269.15811  | 1.02768 |
| 2039 | 3427.46717 | 8.09049  | 13653.70282 | 447.77094  | 2.64588  | 0.03735 | 493.04966  | 0.42532 |
| 2040 | 3550.93860 | 17.43843 | 7375.01529  | 475.61841  | 1.26262  | 0.12588 | 434.72621  | 0.85610 |
| 2041 | 3490.40315 | 18.87337 | 18693.18963 | 447.05799  | 0.42975  | 0.04902 | 402.96717  | 1.74871 |
| 2042 | 4679.45525 | 21.50572 | 9127.13042  | 613.80720  | 3.03175  | 0.05089 | 752.68286  | 0.50638 |
| 2043 | 3194.41895 | 16.71969 | 7065.89676  | 355.45223  | 1.79220  | 0.10211 | 264.06303  | 0.65724 |
| 2044 | 4431.50837 | 14.77411 | 6197.62962  | 676.62497  | 2.40029  | 0.02418 | 776.82680  | 0.33537 |
| 2045 | 4367.54281 | 18.80188 | 9613.16542  | 454.44457  | 1.64080  | 0.04341 | 500.44933  | 0.35493 |
| 2046 | 3575.94860 | 13.29705 | 5287.67033  | 579.29583  | 1.39205  | 0.04203 | 555.36456  | 0.54888 |
| 2047 | 4051.44030 | 9.14930  | 11753.40458 | 238.37758  | -1.35876 | 0.00577 | 325.32065  | 0.11301 |
| 2048 | 3581.90125 | 13.21659 | 5369.50642  | 547.46714  | 0.39371  | 0.04347 | 504.84347  | 0.56812 |
| 2049 | 4980.13094 | 17.63828 | 8842.15463  | 780.63095  | 0.98177  | 0.01809 | 1011.29292 | 0.29811 |
| 2050 | 4677.88129 | 10.79222 | 16739.60164 | 88.31941   | 1.73217  | 0.01183 | 69.38063   | 0.34366 |
| 2051 | 4352.31622 | 23.78877 | 10463.77006 | 839.77125  | 4.02585  | 0.03740 | 928.37856  | 0.56196 |
| 2052 | 4337.03742 | 23.79972 | 10419.84307 | 861.79879  | 3.29909  | 0.02698 | 925.62841  | 0.54893 |
| 2053 | 5112.48674 | 10.95479 | 14080.73738 | 138.35392  | -0.02144 | 0.00258 | 189.40635  | 0.15791 |

|      |            |          |             |           |          |         |           |         |
|------|------------|----------|-------------|-----------|----------|---------|-----------|---------|
| 2054 | 4010.81809 | 17.14882 | 5799.00894  | 404.51688 | -3.24700 | 0.02648 | 459.47661 | 0.81562 |
| 2055 | 4298.13146 | 15.21566 | 12158.40712 | 578.65371 | -1.07057 | 0.02000 | 694.68561 | 0.31417 |
| 2056 | 4003.91752 | 9.96878  | 9363.25661  | 396.78795 | -1.02426 | 0.01202 | 474.03518 | 0.16618 |
| 2057 | 4294.68634 | 15.22767 | 12174.56072 | 442.39960 | -1.23981 | 0.02301 | 502.57577 | 0.26110 |
| 2058 | 2572.55672 | 15.42325 | 10832.94710 | 398.79524 | 5.87554  | 0.29905 | 353.23960 | 0.75857 |
| 2059 | 4399.04550 | 6.55749  | 7942.95126  | 451.29607 | -2.59196 | 0.00301 | 616.24957 | 0.07557 |
| 2060 | 4236.97420 | 23.41031 | 13323.63684 | 778.57035 | 4.30488  | 0.01077 | 892.91365 | 0.16095 |
| 2061 | 4821.23180 | 20.93875 | 7796.93130  | 378.94024 | 2.23830  | 0.04255 | 439.65050 | 0.43473 |
| 2062 | 5282.92405 | 7.88890  | 17472.81646 | 36.68704  | -5.15556 | 0.00012 | 9.82254   | 1.50858 |
| 2063 | 3571.76436 | 17.64312 | 7384.70775  | 417.95271 | -0.03896 | 0.09137 | 382.49259 | 0.83340 |
| 2064 | 4431.42445 | 20.23795 | 8152.59877  | 602.01272 | 5.18089  | 0.11982 | 720.47049 | 0.53745 |
| 2065 | 4378.85960 | 18.87762 | 8589.89678  | 558.56013 | 1.60882  | 0.03616 | 624.30690 | 0.36461 |
| 2066 | 4418.30809 | 17.89890 | 7183.59657  | 561.71006 | 2.37311  | 0.03707 | 637.83458 | 0.39879 |
| 2067 | 3437.52779 | 8.16972  | 13782.60576 | 328.28804 | 1.55391  | 0.03417 | 352.56641 | 0.41806 |
| 2068 | 4640.68581 | 15.42918 | 10147.40708 | 414.80652 | 3.93263  | 0.09820 | 577.84280 | 0.43231 |
| 2069 | 4492.73100 | 12.54168 | 9294.50252  | 678.02928 | 0.38987  | 0.02819 | 798.62499 | 0.26986 |
| 2070 | 4410.39220 | 17.83012 | 7149.74604  | 616.59146 | 3.02033  | 0.05684 | 701.59807 | 0.33359 |
| 2071 | 3412.90675 | 11.54035 | 7646.55706  | 537.07345 | 1.67566  | 0.07461 | 445.12866 | 0.66177 |
| 2072 | 4787.41917 | 22.26331 | 10693.59300 | 372.59894 | 2.48346  | 0.05239 | 452.75570 | 0.49869 |
| 2073 | 4890.22790 | 12.71362 | 7280.26379  | 392.59145 | 3.34393  | 0.03915 | 537.17212 | 0.30195 |
| 2074 | 4496.71746 | 16.57276 | 8473.58780  | 581.54283 | 0.76725  | 0.04609 | 694.77599 | 0.47565 |
| 2075 | 4690.97337 | 19.08375 | 9854.37695  | 608.36427 | 2.06651  | 0.04961 | 785.81329 | 0.30803 |
| 2076 | 4745.96258 | 21.54393 | 19470.69844 | 527.56436 | 4.06156  | 0.03340 | 673.98887 | 0.36845 |
| 2077 | 3565.19787 | 25.35831 | 9349.26448  | 79.80060  | 3.15185  | 0.01011 | 30.80271  | 1.43897 |
| 2078 | 4444.40183 | 20.47060 | 8289.81380  | 419.26698 | 6.24801  | 0.10759 | 422.32359 | 0.57262 |
| 2079 | 4243.62315 | 19.06193 | 7236.44896  | 449.53294 | 4.09092  | 0.05449 | 451.56136 | 0.40553 |
| 2080 | 4653.50309 | 22.41626 | 9642.33836  | 702.24123 | 1.72180  | 0.03938 | 900.29711 | 0.39586 |
| 2081 | 4335.11977 | 17.20337 | 8160.25747  | 605.59061 | 3.54176  | 0.04257 | 645.56951 | 0.43132 |
| 2082 | 4569.36612 | 22.56082 | 13128.77376 | 655.37203 | 4.34019  | 0.02548 | 844.56028 | 0.37997 |
| 2083 | 4421.22415 | 16.96493 | 10256.80255 | 346.09484 | 5.09647  | 0.06828 | 442.27125 | 0.61030 |
| 2084 | 3576.80241 | 13.30496 | 5255.38650  | 613.75928 | 1.59659  | 0.03674 | 592.18513 | 0.70423 |
| 2085 | 4767.11488 | 8.13856  | 9249.35851  | 365.21198 | -1.10124 | 0.00372 | 518.85405 | 0.09246 |
| 2086 | 4423.26604 | 11.46385 | 8402.71049  | 672.21272 | -0.11823 | 0.01532 | 827.80210 | 0.12406 |
| 2087 | 4512.95770 | 21.14264 | 10018.58121 | 357.78839 | 5.97352  | 0.09599 | 400.27803 | 0.53517 |
| 2088 | 3534.05908 | 17.36675 | 7973.23558  | 460.34343 | 0.52440  | 0.05871 | 474.58843 | 0.58162 |
| 2089 | 4758.94911 | 8.20745  | 9918.83594  | 280.80410 | -5.12362 | 0.00301 | 389.13339 | 0.07618 |
| 2090 | 4767.63639 | 14.72379 | 11089.19876 | 417.10004 | 2.38615  | 0.01993 | 596.60932 | 0.37751 |
| 2091 | 4767.99343 | 18.37956 | 10679.36952 | 595.67476 | 2.67061  | 0.03431 | 746.48163 | 0.35452 |
| 2092 | 4709.71676 | 17.93114 | 16191.53233 | 394.99760 | 4.09299  | 0.02664 | 524.12767 | 0.22284 |
| 2093 | 3740.35322 | 11.70269 | 7554.44375  | 854.82645 | 2.84422  | 0.02669 | 797.79538 | 0.66953 |
| 2094 | 2823.46922 | 14.77349 | 14170.81072 | 457.17507 | 3.95660  | 0.22641 | 398.69036 | 0.66846 |
| 2095 | 4084.69593 | 18.97663 | 6711.19983  | 714.59141 | 3.21795  | 0.07392 | 746.41979 | 0.61518 |
| 2096 | 4236.23791 | 23.42207 | 12369.08639 | 845.36530 | 3.55279  | 0.01074 | 963.29747 | 0.14963 |
| 2097 | 4064.84113 | 25.72104 | 8908.21917  | 812.55562 | 2.01368  | 0.01127 | 825.22758 | 0.45308 |
| 2098 | 4525.80340 | 20.05143 | 21580.51821 | 511.92228 | 5.27851  | 0.11984 | 683.41119 | 0.42947 |
| 2099 | 3153.73477 | 24.97387 | 7962.45902  | 589.39612 | 3.80384  | 0.11546 | 367.97414 | 1.17689 |
| 2100 | 5085.33532 | 9.73042  | 14763.54818 | 138.15888 | -2.23900 | 0.00233 | 175.52493 | 0.36487 |
| 2101 | 3531.73805 | 16.76673 | 17100.49681 | 436.61950 | 2.26930  | 0.17016 | 379.24718 | 0.84992 |
| 2102 | 4420.12955 | 16.95563 | 10247.85571 | 417.15501 | 5.30673  | 0.07187 | 544.93040 | 0.60138 |
| 2103 | 3901.80697 | 24.65608 | 10017.85193 | 972.44982 | 7.27322  | 0.01547 | 971.30695 | 0.31028 |
| 2104 | 4661.31439 | 16.45521 | 17829.65997 | 416.75678 | 4.68102  | 0.09978 | 555.57395 | 0.43400 |
| 2105 | 4675.81345 | 18.87134 | 12285.31401 | 664.14137 | 4.30795  | 0.04724 | 836.97994 | 0.38159 |
| 2106 | 5088.98713 | 13.31187 | 12206.58153 | 102.93739 | 0.66681  | 0.00118 | 114.75721 | 0.33817 |
| 2107 | 4958.18973 | 6.85752  | 16468.27643 | 122.86886 | -1.69156 | 0.00166 | 147.54678 | 0.17061 |
| 2108 | 4334.43135 | 17.22399 | 8162.56345  | 591.26169 | 3.47605  | 0.04219 | 621.42202 | 0.39615 |
| 2109 | 4399.50802 | 6.56791  | 8079.88201  | 490.55248 | -1.87350 | 0.00335 | 659.62330 | 0.06548 |
| 2110 | 5111.85260 | 10.95685 | 16225.10412 | 161.24957 | -1.04536 | 0.00234 | 224.24484 | 0.13877 |
| 2111 | 3797.71620 | 24.62377 | 12737.97586 | 82.10664  | 4.49688  | 0.00758 | 32.73410  | 1.29144 |
| 2112 | 4421.35412 | 17.92476 | 7199.47515  | 643.62000 | 0.72425  | 0.03301 | 766.03769 | 0.32032 |
| 2113 | 4640.46988 | 15.42952 | 10224.25203 | 413.11944 | 4.15113  | 0.09568 | 572.27329 | 0.42372 |
| 2114 | 4146.16497 | 16.44557 | 8938.98847  | 611.26474 | 0.11735  | 0.02404 | 646.37144 | 0.39686 |
| 2115 | 5122.28370 | 10.69958 | 9674.69736  | 46.84848  | -2.75906 | 0.00045 | 13.41855  | 0.67421 |
| 2116 | 4146.04937 | 12.86657 | 12604.51826 | 250.93263 | -0.55880 | 0.00569 | 339.73269 | 0.11784 |
| 2117 | 3741.85644 | 11.73435 | 7570.23876  | 765.28059 | 2.68933  | 0.02114 | 725.65156 | 0.55724 |
| 2118 | 3502.90253 | 15.39079 | 11524.48961 | 363.04193 | 2.16720  | 0.09993 | 246.43594 | 0.53673 |
| 2119 | 4381.09352 | 18.72533 | 8624.59878  | 475.11759 | 0.75188  | 0.03785 | 492.75259 | 0.37231 |
| 2120 | 3736.06785 | 11.63311 | 8718.39114  | 636.92208 | 1.39658  | 0.02748 | 624.13619 | 0.60570 |
| 2121 | 2980.19280 | 16.72651 | 16776.07586 | 429.72046 | 3.80246  | 0.24159 | 359.76636 | 1.01233 |
| 2122 | 4966.83087 | 8.63177  | 9988.15194  | 277.40594 | -0.21273 | 0.00298 | 405.73654 | 0.11271 |
| 2123 | 4281.65366 | 14.16937 | 6881.26567  | 503.70539 | -2.16925 | 0.02065 | 574.09339 | 0.45494 |
| 2124 | 4820.63472 | 20.94554 | 7791.14347  | 590.75343 | 3.05333  | 0.04099 | 728.49796 | 0.42640 |

|      |            |          |             |           |          |         |           |         |
|------|------------|----------|-------------|-----------|----------|---------|-----------|---------|
| 2125 | 3806.41550 | 23.72457 | 12165.05685 | 693.79940 | 6.49713  | 0.02026 | 704.51299 | 0.05307 |
| 2126 | 4922.04705 | 19.95333 | 11513.27885 | 346.49983 | 1.50529  | 0.05327 | 464.47332 | 0.40096 |
| 2127 | 3184.04514 | 15.85839 | 12260.48320 | 447.63519 | 2.88846  | 0.10817 | 382.42121 | 0.72487 |
| 2128 | 3598.92753 | 13.03408 | 20134.95467 | 344.05295 | 2.07642  | 0.02019 | 428.04022 | 0.34991 |
| 2129 | 4444.87577 | 20.46257 | 8267.06719  | 336.35755 | 6.67721  | 0.10757 | 336.52733 | 0.56666 |
| 2130 | 5037.07138 | 13.44613 | 8725.40969  | 267.44556 | 1.42396  | 0.01329 | 385.04506 | 0.21359 |
| 2131 | 3430.09904 | 8.08738  | 13631.68523 | 386.67071 | 1.01642  | 0.03121 | 408.20061 | 0.44490 |
| 2132 | 4971.15591 | 10.97643 | 10203.91255 | 94.94463  | 0.18948  | 0.00282 | 78.77755  | 0.27019 |
| 2133 | 4408.31893 | 22.67180 | 8506.99941  | 643.73203 | 4.35243  | 0.01762 | 867.26570 | 0.29764 |
| 2134 | 4708.29914 | 15.77015 | 11397.25753 | 559.15381 | 5.08049  | 0.05508 | 735.67478 | 0.40274 |
| 2135 | 3940.99175 | 20.04980 | 9121.29308  | 837.46012 | 5.93612  | 0.05987 | 702.24402 | 0.71425 |
| 2136 | 2875.93900 | 16.56258 | 13985.52861 | 364.18536 | 4.38846  | 0.23618 | 226.27905 | 0.73089 |
| 2137 | 4205.61487 | 24.75366 | 8178.92461  | 862.90741 | 2.70495  | 0.02705 | 929.71354 | 0.42376 |
| 2138 | 3736.99975 | 12.97337 | 13648.96506 | 195.48203 | -0.69870 | 0.00367 | 235.89862 | 0.23053 |
| 2139 | 4683.62111 | 13.64092 | 9876.41036  | 394.23106 | 5.06266  | 0.02312 | 487.43169 | 0.20553 |
| 2140 | 4575.02605 | 10.42112 | 9311.91585  | 519.86038 | -2.42636 | 0.02314 | 664.63772 | 0.19396 |
| 2141 | 4147.27027 | 16.45379 | 8961.46805  | 606.50894 | 0.14504  | 0.01981 | 633.95802 | 0.38698 |
| 2142 | 4511.77581 | 19.82523 | 7326.00324  | 548.48514 | 2.29942  | 0.05948 | 666.06010 | 0.40712 |
| 2143 | 4425.53810 | 11.53275 | 8413.00284  | 599.38640 | -0.83684 | 0.01242 | 751.98245 | 0.21432 |
| 2144 | 4567.80812 | 22.50831 | 12957.07197 | 571.22242 | 4.79040  | 0.02703 | 688.60918 | 0.43799 |
| 2145 | 4338.95079 | 16.16667 | 9293.74541  | 431.47862 | 4.97797  | 0.08242 | 587.01975 | 0.44881 |
| 2146 | 3776.67947 | 9.58458  | 8277.27805  | 417.22574 | -0.88427 | 0.04570 | 374.45664 | 0.59695 |
| 2147 | 4981.53410 | 17.69005 | 8843.39848  | 548.91874 | 1.53714  | 0.02157 | 730.12733 | 0.32374 |
| 2148 | 3540.35392 | 16.74735 | 17324.86098 | 466.17085 | 1.23758  | 0.14766 | 430.51564 | 0.75327 |
| 2149 | 4006.73436 | 9.89936  | 9298.26783  | 315.59559 | -1.64401 | 0.00670 | 408.50699 | 0.19920 |
| 2150 | 4778.15902 | 10.35255 | 11690.22150 | 509.27060 | -0.88594 | 0.01039 | 696.25785 | 0.14268 |
| 2151 | 3799.90244 | 24.10805 | 11033.38175 | 721.39756 | 3.14641  | 0.04220 | 662.34766 | 0.83347 |
| 2152 | 4845.19727 | 15.30824 | 11084.21577 | 520.98370 | 3.23371  | 0.02666 | 749.56998 | 0.32398 |
| 2153 | 4553.85451 | 22.52865 | 12732.45572 | 457.67334 | 4.83963  | 0.02672 | 553.28825 | 0.38804 |
| 2154 | 3501.06235 | 9.30905  | 7966.13129  | 410.11022 | 0.67596  | 0.03861 | 318.42553 | 0.48126 |
| 2155 | 4461.83869 | 20.35488 | 10202.00468 | 639.39493 | 5.36653  | 0.02117 | 784.50173 | 0.29470 |
| 2156 | 3965.42099 | 22.97658 | 7862.10517  | 879.07074 | 3.04384  | 0.04374 | 884.74866 | 0.52831 |
| 2157 | 4663.32528 | 18.76768 | 12264.80634 | 408.64160 | 4.93204  | 0.04459 | 485.95772 | 0.35298 |
| 2158 | 2553.36205 | 15.49721 | 4097.06923  | 458.91145 | 5.70467  | 0.25318 | 393.30358 | 0.80644 |
| 2159 | 4844.54943 | 15.79364 | 10223.94333 | 398.73961 | 2.70261  | 0.02885 | 591.83288 | 0.26531 |
| 2160 | 4708.60096 | 15.77358 | 11409.58557 | 331.32891 | 3.39915  | 0.05041 | 418.13621 | 0.39605 |
| 2161 | 4300.07073 | 15.22135 | 12145.30826 | 417.87895 | -1.89874 | 0.01812 | 492.70240 | 0.31013 |
| 2162 | 4782.92435 | 16.52749 | 9793.50485  | 595.54510 | 1.81047  | 0.04790 | 750.48833 | 0.35803 |
| 2163 | 2707.99929 | 26.11385 | 11832.31929 | 850.03523 | 8.00408  | 0.17435 | 585.17606 | 0.97226 |
| 2164 | 4506.74355 | 16.69979 | 8489.52030  | 621.70484 | 0.03075  | 0.03640 | 728.85736 | 0.41641 |
| 2165 | 4890.40023 | 9.34932  | 10045.29717 | 445.08411 | -1.02782 | 0.02317 | 578.27334 | 0.37508 |
| 2166 | 4578.75746 | 18.01073 | 8255.07522  | 467.97146 | 2.38108  | 0.02658 | 618.45931 | 0.29832 |
| 2167 | 4912.44614 | 13.69451 | 8072.55562  | 478.85743 | 2.21383  | 0.01648 | 706.52309 | 0.22580 |
| 2168 | 3428.22765 | 8.08719  | 13650.70581 | 410.42195 | 1.75959  | 0.03498 | 451.21258 | 0.44255 |
| 2169 | 5076.00354 | 13.17533 | 12135.03094 | 109.34778 | -1.65455 | 0.00127 | 123.70314 | 0.33670 |
| 2170 | 4616.14094 | 18.64014 | 8333.01292  | 510.99735 | 4.47551  | 0.03235 | 664.30344 | 0.35495 |
| 2171 | 5012.11981 | 6.81665  | 9331.19158  | 330.53128 | -0.23449 | 0.00123 | 500.93312 | 0.03323 |
| 2172 | 3678.65951 | 7.66091  | 5908.01048  | 421.49383 | -1.01732 | 0.02832 | 429.63658 | 0.52671 |
| 2173 | 4690.47334 | 13.68217 | 9820.77043  | 381.50251 | 2.28616  | 0.01938 | 455.87108 | 0.23888 |
| 2174 | 4525.85872 | 20.06346 | 21807.24867 | 429.33158 | 4.93910  | 0.11699 | 563.44796 | 0.28965 |
| 2175 | 4146.98937 | 16.44420 | 8963.91990  | 714.47803 | -0.21982 | 0.02188 | 790.31230 | 0.38506 |
| 2176 | 4493.18512 | 20.51039 | 16024.85279 | 749.24017 | 2.74034  | 0.01221 | 909.04597 | 0.27632 |
| 2177 | 3622.44593 | 13.37781 | 29858.55853 | 198.28916 | 0.42850  | 0.01631 | 226.67185 | 0.28402 |
| 2178 | 3864.66368 | 24.03251 | 12306.95321 | 715.44314 | 5.73565  | 0.01644 | 706.78532 | 0.07314 |
| 2179 | 4173.57374 | 23.75159 | 8379.91333  | 917.85124 | 3.07753  | 0.06316 | 944.22368 | 0.59234 |
| 2180 | 4334.67026 | 17.18183 | 8153.38826  | 602.59853 | 3.41227  | 0.04409 | 637.11601 | 0.40732 |
| 2181 | 3478.21322 | 13.99819 | 7338.56831  | 534.28958 | 3.07784  | 0.06627 | 471.74435 | 0.58182 |
| 2182 | 4504.61180 | 16.55154 | 8920.34974  | 481.69920 | -0.55680 | 0.02848 | 564.40446 | 0.30406 |
| 2183 | 4505.18862 | 21.13495 | 9937.61775  | 486.21872 | 4.31512  | 0.06572 | 600.10838 | 0.49970 |
| 2184 | 4890.54900 | 9.35399  | 10045.21818 | 464.54702 | -2.65674 | 0.02353 | 609.44798 | 0.38631 |
| 2185 | 4056.86030 | 12.50873 | 14975.00864 | 101.12642 | -1.99601 | 0.00284 | 81.47497  | 1.38031 |
| 2186 | 3575.15543 | 13.30359 | 5278.90256  | 457.04569 | 1.40977  | 0.04379 | 378.18485 | 0.54924 |
| 2187 | 4484.80859 | 20.99981 | 9228.47729  | 558.74199 | 2.81366  | 0.04368 | 724.89646 | 0.39164 |
| 2188 | 4265.69041 | 16.20169 | 7764.59589  | 726.50120 | 1.67471  | 0.05185 | 787.08025 | 0.45737 |
| 2189 | 4958.20438 | 6.64033  | 10869.62028 | 365.53559 | -4.36998 | 0.00622 | 516.96848 | 0.18623 |
| 2190 | 4004.65488 | 9.84236  | 9366.09084  | 261.57697 | -2.03720 | 0.00751 | 330.00031 | 0.20694 |
| 2191 | 3181.46599 | 15.82364 | 9642.16869  | 547.34921 | 3.39105  | 0.18997 | 446.89528 | 0.73600 |
| 2192 | 3502.02024 | 15.36398 | 11503.51484 | 529.80843 | 2.79567  | 0.10560 | 501.51289 | 0.52628 |
| 2193 | 2568.72942 | 15.61979 | 11094.46642 | 441.33103 | 5.12845  | 0.30441 | 483.18047 | 0.16353 |
| 2194 | 5003.02752 | 7.78254  | 13758.97021 | 201.32662 | -0.43368 | 0.00187 | 297.71345 | 0.08310 |
| 2195 | 3210.20893 | 20.76233 | 10261.89958 | 550.49194 | 3.20574  | 0.14941 | 438.86643 | 1.12177 |

|      |            |          |             |           |          |         |           |         |
|------|------------|----------|-------------|-----------|----------|---------|-----------|---------|
| 2196 | 3192.29631 | 18.30921 | 10651.34144 | 392.15551 | 3.11123  | 0.17710 | 332.67419 | 0.79753 |
| 2197 | 3318.43583 | 14.56930 | 11569.93891 | 277.29011 | 1.82796  | 0.05883 | 227.52833 | 0.62347 |
| 2198 | 4843.81775 | 12.55119 | 13053.31891 | 449.58621 | 3.18110  | 0.02237 | 632.31483 | 0.29130 |
| 2199 | 4333.57604 | 17.26355 | 8154.34534  | 533.84232 | 2.58882  | 0.04124 | 550.63268 | 0.36015 |
| 2200 | 3776.08298 | 12.10091 | 9407.13676  | 614.90353 | 0.34781  | 0.02941 | 614.85867 | 0.49713 |
| 2201 | 2560.12586 | 14.69780 | 4134.17681  | 483.51422 | 4.67420  | 0.26472 | 450.08923 | 1.61654 |
| 2202 | 4615.80285 | 18.64422 | 8337.54378  | 416.16068 | 5.17722  | 0.03663 | 535.24959 | 0.35283 |
| 2203 | 4649.53116 | 22.39532 | 9734.35131  | 708.47739 | 1.91266  | 0.03355 | 905.95913 | 0.44395 |
| 2204 | 4366.31848 | 18.85911 | 9569.44136  | 577.09712 | 3.55370  | 0.04657 | 656.82769 | 0.40653 |
| 2205 | 4877.40769 | 16.85978 | 8588.37576  | 463.95879 | 2.12526  | 0.05765 | 626.97517 | 0.40359 |
| 2206 | 4027.96593 | 25.16077 | 7278.58110  | 54.66650  | 3.24629  | 0.00272 | 14.16273  | 2.03343 |
| 2207 | 3766.91163 | 11.92629 | 9287.77706  | 640.02418 | 1.81745  | 0.02996 | 628.25754 | 0.56344 |
| 2208 | 4929.61042 | 7.62598  | 9067.73339  | 358.19109 | -2.34274 | 0.00036 | 546.53868 | 0.02835 |
| 2209 | 4536.58537 | 20.24363 | 24724.38219 | 409.38766 | 6.85793  | 0.07837 | 548.26754 | 0.39377 |
| 2210 | 3629.12876 | 17.58103 | 17078.97091 | 282.97378 | -0.10042 | 0.09768 | 180.80534 | 0.94042 |
| 2211 | 4946.13583 | 13.16273 | 9383.97620  | 387.26958 | 4.54474  | 0.01099 | 584.41021 | 0.13772 |
| 2212 | 4979.93002 | 17.60791 | 8851.30905  | 765.31110 | 0.40423  | 0.02126 | 998.47986 | 0.32204 |
| 2213 | 4972.08744 | 8.57107  | 9426.85198  | 273.28804 | -0.40520 | 0.00283 | 399.01800 | 0.11538 |
| 2214 | 4421.21474 | 16.95555 | 10255.00549 | 374.82996 | 5.45336  | 0.07063 | 486.69781 | 0.60200 |
| 2215 | 2492.90625 | 14.43211 | 3701.71851  | 479.12402 | 6.14958  | 0.32035 | 501.71384 | 0.67147 |
| 2216 | 4005.14022 | 9.88347  | 9297.72467  | 268.14459 | -1.59103 | 0.00707 | 299.79377 | 0.18961 |
| 2217 | 3220.58688 | 14.54752 | 10060.52712 | 384.36611 | 2.78475  | 0.09533 | 415.31110 | 0.42058 |
| 2218 | 4462.59383 | 20.98625 | 9406.93556  | 535.26636 | 2.31845  | 0.04154 | 695.07751 | 0.38090 |
| 2219 | 2553.44707 | 15.10594 | 4061.31120  | 487.38720 | 5.95837  | 0.24332 | 468.58609 | 1.28849 |
| 2220 | 5112.50391 | 10.95204 | 14437.26945 | 153.44263 | 0.44920  | 0.00239 | 211.58311 | 0.16971 |
| 2221 | 4604.87015 | 22.17085 | 10973.71300 | 580.82774 | 5.56066  | 0.09289 | 703.99789 | 0.59476 |
| 2222 | 4759.76607 | 18.20657 | 10682.41543 | 644.24868 | 1.68673  | 0.03310 | 824.44546 | 0.36118 |
| 2223 | 4281.50946 | 14.17648 | 6879.76209  | 530.75012 | -1.52570 | 0.01949 | 605.38220 | 0.44536 |
| 2224 | 4043.67802 | 9.49144  | 11852.40416 | 221.71201 | -2.12612 | 0.00334 | 266.50536 | 0.20673 |
| 2225 | 3286.62164 | 18.70850 | 18759.23168 | 439.43868 | 2.05434  | 0.20763 | 385.73393 | 0.86751 |
| 2226 | 4951.99969 | 6.75607  | 16789.56022 | 121.38181 | -1.74575 | 0.00163 | 147.45942 | 0.18675 |
| 2227 | 4574.07584 | 20.72806 | 16996.46640 | 570.20282 | 3.82312  | 0.09462 | 734.05983 | 0.48981 |
| 2228 | 4424.87708 | 17.39661 | 10692.65024 | 694.29313 | 1.14304  | 0.02922 | 799.36103 | 0.41229 |
| 2229 | 4881.85943 | 19.76143 | 11051.21063 | 388.80176 | 4.22109  | 0.07686 | 515.92700 | 0.35326 |
| 2230 | 4664.44195 | 16.57281 | 17951.33991 | 335.56962 | 4.26650  | 0.08349 | 446.65100 | 0.44792 |
| 2231 | 4784.78494 | 15.47060 | 7030.62496  | 319.36789 | 2.05227  | 0.01386 | 458.60202 | 0.21940 |
| 2232 | 4678.93865 | 10.86580 | 16768.16897 | 118.77359 | 1.74929  | 0.00850 | 125.79102 | 0.36472 |
| 2233 | 3680.56637 | 7.62926  | 5917.34707  | 392.83056 | 0.73776  | 0.02621 | 390.32528 | 0.57309 |
| 2234 | 4878.70821 | 7.75205  | 10014.32890 | 413.18409 | 0.00015  | 0.00790 | 549.57767 | 0.23824 |
| 2235 | 4849.95812 | 15.82087 | 8868.72661  | 343.11056 | 3.59440  | 0.02842 | 506.41386 | 0.26532 |
| 2236 | 4416.60799 | 22.69258 | 8619.62502  | 612.23859 | 3.58373  | 0.01446 | 810.89859 | 0.25163 |
| 2237 | 3475.95522 | 13.94508 | 7314.89262  | 540.91056 | 2.91909  | 0.06602 | 498.16277 | 0.59440 |
| 2238 | 3539.03682 | 9.39264  | 7257.90496  | 706.54396 | 2.42677  | 0.04382 | 693.94063 | 0.68520 |
| 2239 | 4828.63641 | 9.59443  | 7197.21632  | 156.90853 | 0.59668  | 0.00548 | 197.95187 | 0.28468 |
| 2240 | 4240.60163 | 17.39050 | 7577.94873  | 717.76101 | 0.06579  | 0.02465 | 810.64434 | 0.47337 |
| 2241 | 4231.73544 | 18.87676 | 6838.07734  | 848.91169 | 3.61524  | 0.05687 | 875.45887 | 0.45727 |
| 2242 | 4214.59006 | 24.73795 | 8213.90937  | 770.37427 | 2.63176  | 0.02597 | 891.62155 | 0.40963 |
| 2243 | 4236.29628 | 23.42307 | 12366.98328 | 731.84941 | 3.53831  | 0.01056 | 848.92111 | 0.15034 |
| 2244 | 3499.42814 | 9.28156  | 7963.34865  | 473.57590 | 1.05231  | 0.03941 | 438.25016 | 0.70883 |
| 2245 | 3905.92654 | 24.69853 | 10053.80598 | 932.92748 | 5.67412  | 0.01360 | 903.63538 | 0.36203 |
| 2246 | 4618.41844 | 7.79233  | 16756.24456 | 117.06277 | -3.78911 | 0.00002 | 148.02855 | 0.10537 |
| 2247 | 4847.07744 | 13.30464 | 10790.15377 | 376.03290 | 1.26206  | 0.02255 | 563.87960 | 0.28340 |
| 2248 | 4381.58336 | 18.86273 | 8614.74656  | 655.40792 | 2.32467  | 0.03682 | 705.19349 | 0.41638 |
| 2249 | 4910.89590 | 13.66144 | 8081.50840  | 460.43605 | 2.25269  | 0.01713 | 684.62963 | 0.20308 |
| 2250 | 4536.30363 | 20.24341 | 24743.15040 | 454.22545 | 4.08451  | 0.10843 | 593.05520 | 0.40312 |
| 2251 | 3669.20778 | 14.08523 | 9916.61216  | 608.69179 | 2.06285  | 0.07945 | 614.80287 | 0.63883 |
| 2252 | 4758.62896 | 14.78364 | 11464.22001 | 377.29042 | 2.99670  | 0.02327 | 548.67688 | 0.33818 |
| 2253 | 4371.61755 | 20.42095 | 9917.67618  | 501.86932 | 3.13603  | 0.04438 | 555.99862 | 0.45220 |
| 2254 | 4380.94527 | 18.87920 | 8617.30270  | 482.15287 | 2.23772  | 0.03708 | 498.00840 | 0.41726 |
| 2255 | 3488.13854 | 18.87317 | 18720.89063 | 460.19592 | -0.16250 | 0.05060 | 425.41261 | 1.75926 |
| 2256 | 3167.40623 | 19.67256 | 17766.70495 | 449.19426 | 1.74717  | 0.14634 | 415.54955 | 0.75584 |
| 2257 | 4706.05149 | 11.08721 | 15915.84827 | 135.83718 | 2.21809  | 0.00451 | 176.99348 | 0.22800 |
| 2258 | 4642.36126 | 22.38177 | 9739.51694  | 617.97663 | 2.12062  | 0.03601 | 814.24172 | 0.48198 |
| 2259 | 3209.69160 | 20.75822 | 10260.70831 | 548.26111 | 3.55623  | 0.14821 | 433.14862 | 1.06907 |
| 2260 | 4538.62126 | 20.28555 | 24747.91783 | 275.05300 | 6.65375  | 0.10205 | 333.65468 | 0.40967 |
| 2261 | 4648.15461 | 20.83938 | 9257.93896  | 393.59662 | 4.27420  | 0.08947 | 455.96615 | 0.49670 |
| 2262 | 4668.27600 | 20.14822 | 8177.13821  | 441.53495 | 5.26255  | 0.04740 | 606.94702 | 0.24366 |
| 2263 | 3623.05010 | 12.57029 | 27155.87393 | 259.52450 | -0.43048 | 0.01522 | 264.02159 | 0.47381 |
| 2264 | 3735.88482 | 11.60740 | 8729.50701  | 589.71304 | 1.02651  | 0.02884 | 594.74060 | 0.61222 |
| 2265 | 4523.36558 | 19.93874 | 7365.02674  | 619.52436 | 1.45954  | 0.04703 | 773.02452 | 0.46593 |
| 2266 | 4843.53355 | 12.62934 | 14456.87284 | 374.32375 | 3.65008  | 0.02376 | 533.55377 | 0.23113 |

|      |            |          |             |           |          |         |           |         |
|------|------------|----------|-------------|-----------|----------|---------|-----------|---------|
| 2267 | 2917.21557 | 20.02402 | 8125.65501  | 449.66519 | 4.69459  | 0.28920 | 293.49129 | 1.09545 |
| 2268 | 3217.03118 | 19.25346 | 13222.83203 | 438.30056 | 2.83071  | 0.19663 | 338.57086 | 0.73847 |
| 2269 | 4913.41553 | 13.69179 | 8091.81073  | 452.83433 | 3.15348  | 0.01793 | 667.66054 | 0.21036 |
| 2270 | 4994.12442 | 10.08357 | 9763.64527  | 199.16708 | 0.14450  | 0.00650 | 239.48023 | 0.16597 |
| 2271 | 4689.02297 | 18.22108 | 16569.84395 | 353.84722 | 3.97916  | 0.03165 | 481.74514 | 0.14741 |
| 2272 | 3912.80181 | 18.35735 | 7202.00762  | 702.47769 | 5.75718  | 0.06615 | 636.93671 | 0.61189 |
| 2273 | 4459.30270 | 21.78479 | 7985.44636  | 612.30719 | 1.92847  | 0.03107 | 789.55161 | 0.30703 |
| 2274 | 3839.86354 | 20.22024 | 6338.72774  | 522.94226 | 1.83864  | 0.02544 | 472.64238 | 0.50109 |
| 2275 | 4626.26646 | 15.30870 | 10135.19105 | 241.64312 | 4.33559  | 0.10024 | 300.41832 | 0.46208 |
| 2276 | 3767.33931 | 9.58537  | 8335.79102  | 588.54276 | 1.66728  | 0.06332 | 596.94479 | 0.51299 |
| 2277 | 4348.21089 | 16.70802 | 12314.62337 | 53.70085  | 0.35924  | 0.00305 | 9.69202   | 1.24429 |
| 2278 | 4558.82731 | 10.08474 | 17182.36874 | 65.40432  | -1.42833 | 0.00170 | 50.78365  | 1.24453 |
| 2279 | 4792.29671 | 15.81721 | 7406.56326  | 381.29494 | 3.19935  | 0.01426 | 555.38434 | 0.20452 |
| 2280 | 4687.27807 | 15.31276 | 14121.63918 | 216.06888 | 4.19605  | 0.06659 | 266.36384 | 0.28212 |
| 2281 | 4635.24726 | 22.34108 | 9559.96872  | 639.85957 | 3.80924  | 0.04180 | 815.32035 | 0.41880 |
| 2282 | 4544.61896 | 15.95859 | 11273.76841 | 572.02673 | 4.36769  | 0.07559 | 801.16557 | 0.38472 |
| 2283 | 4521.35269 | 19.91752 | 7354.50691  | 541.68177 | 1.99794  | 0.05073 | 659.64540 | 0.44442 |
| 2284 | 4367.91231 | 18.80508 | 9614.95502  | 556.01041 | 3.49941  | 0.04395 | 634.87075 | 0.34891 |
| 2285 | 4056.08184 | 14.00600 | 11748.08435 | 69.15482  | -1.27576 | 0.00446 | 44.46685  | 1.10423 |
| 2286 | 3395.02471 | 11.75100 | 7582.99252  | 555.94927 | 2.85282  | 0.09168 | 480.05327 | 0.78050 |
| 2287 | 2548.68618 | 14.84254 | 3991.43081  | 353.06065 | 5.91020  | 0.23551 | 287.09997 | 1.17758 |
| 2288 | 4488.37833 | 20.64069 | 9765.57184  | 385.13862 | 6.00921  | 0.11157 | 425.36759 | 0.46931 |
| 2289 | 5113.04223 | 10.97702 | 16233.53444 | 189.13178 | -1.17782 | 0.00213 | 283.57290 | 0.15402 |
| 2290 | 4430.74091 | 14.67354 | 6233.95636  | 599.92626 | 2.62772  | 0.02515 | 680.37392 | 0.31936 |
| 2291 | 4576.23042 | 10.21793 | 9305.15703  | 440.63735 | -3.06523 | 0.01940 | 556.99804 | 0.36654 |
| 2292 | 4399.38970 | 6.55347  | 7984.23438  | 325.71408 | -3.30187 | 0.00270 | 434.93636 | 0.10686 |
| 2293 | 4945.78059 | 13.15915 | 9463.07811  | 325.44208 | 2.74341  | 0.01027 | 499.44865 | 0.19477 |
| 2294 | 3540.57871 | 9.42314  | 7235.84937  | 653.71468 | 2.65667  | 0.04008 | 618.80273 | 0.63545 |
| 2295 | 3181.32320 | 18.28091 | 10440.81766 | 306.56706 | 2.92111  | 0.17558 | 259.40277 | 0.77518 |
| 2296 | 4440.31467 | 20.40649 | 8241.94808  | 471.10897 | 5.02371  | 0.10641 | 522.83238 | 0.56673 |
| 2297 | 4064.52175 | 9.07004  | 11363.10831 | 191.43516 | -2.10105 | 0.00623 | 254.71570 | 0.13495 |
| 2298 | 4973.18095 | 8.59032  | 9208.60420  | 335.60040 | 1.18190  | 0.00395 | 495.27439 | 0.09899 |
| 2299 | 3787.86904 | 25.39666 | 6715.27105  | 67.46029  | 3.48657  | 0.00517 | 20.93260  | 1.41893 |
| 2300 | 4492.57408 | 12.54156 | 9290.02983  | 535.51245 | 0.73244  | 0.02773 | 638.81799 | 0.27136 |
| 2301 | 4718.71540 | 19.28729 | 9885.60151  | 608.05466 | 1.82230  | 0.03885 | 770.45635 | 0.29150 |
| 2302 | 2576.43699 | 15.03852 | 10869.38768 | 442.73315 | 5.71056  | 0.28487 | 379.34271 | 0.86493 |
| 2303 | 4266.84806 | 23.21463 | 11932.93104 | 712.29160 | 4.32172  | 0.00948 | 840.11757 | 0.12216 |
| 2304 | 4571.51831 | 14.12648 | 21540.63149 | 58.90769  | -2.14048 | 0.00001 | 22.55099  | 0.42020 |
| 2305 | 3319.74184 | 24.37703 | 10732.15276 | 996.15478 | 10.63274 | 0.20233 | 623.90307 | 1.98974 |
| 2306 | 4672.06173 | 20.18010 | 9981.43431  | 391.20507 | 3.82837  | 0.04622 | 561.38389 | 0.30062 |
| 2307 | 4552.85135 | 22.52436 | 12869.36034 | 423.30870 | 3.86390  | 0.02477 | 512.82229 | 0.38509 |
| 2308 | 3380.38795 | 9.70630  | 6883.03105  | 334.61662 | 1.96024  | 0.05711 | 348.64146 | 0.42920 |
| 2309 | 3735.70919 | 11.62789 | 8689.74634  | 437.38017 | -0.16672 | 0.03541 | 403.86416 | 0.57314 |
| 2310 | 4709.89174 | 15.81172 | 11396.32165 | 487.92963 | 3.89938  | 0.05736 | 634.27040 | 0.38279 |
| 2311 | 4489.99211 | 21.07904 | 9223.91692  | 537.25340 | 2.36762  | 0.04284 | 692.33774 | 0.37984 |
| 2312 | 3741.72480 | 11.73277 | 7572.67139  | 753.76006 | 2.61516  | 0.02528 | 710.20400 | 0.55489 |
| 2313 | 4523.43953 | 19.92920 | 7366.14864  | 520.72431 | 2.41835  | 0.04794 | 604.96726 | 0.44683 |
| 2314 | 4399.57156 | 6.57315  | 7883.03213  | 338.47758 | -2.12539 | 0.00373 | 444.26917 | 0.06783 |
| 2315 | 4505.65645 | 16.69985 | 8490.81678  | 605.68868 | 0.86174  | 0.03644 | 713.29187 | 0.40535 |
| 2316 | 2560.14784 | 26.14410 | 11084.02631 | 823.45403 | 8.33549  | 0.18878 | 527.30692 | 1.04347 |
| 2317 | 2895.74311 | 16.39385 | 14643.75256 | 406.72788 | 4.50985  | 0.18936 | 393.54951 | 0.64186 |
| 2318 | 3064.14298 | 19.43251 | 10779.70673 | 450.41161 | 3.83470  | 0.12800 | 262.27308 | 1.06714 |
| 2319 | 4769.35189 | 14.71707 | 11081.30272 | 319.44230 | 2.82784  | 0.01889 | 448.59550 | 0.38273 |
| 2320 | 3570.38694 | 17.65714 | 7353.40864  | 444.80305 | 0.04659  | 0.09118 | 425.26334 | 0.80184 |
| 2321 | 4896.58942 | 12.81119 | 7280.62837  | 282.45856 | 3.50568  | 0.04038 | 368.19690 | 0.31454 |
| 2322 | 4945.22398 | 7.28703  | 9825.85661  | 327.40253 | -4.28876 | 0.00026 | 476.35219 | 0.03503 |
| 2323 | 4570.42587 | 17.91363 | 8313.23907  | 412.94949 | 2.35154  | 0.02736 | 556.01342 | 0.31716 |
| 2324 | 4907.85099 | 13.57536 | 8051.08201  | 396.00113 | 4.28181  | 0.01842 | 583.82797 | 0.20750 |
| 2325 | 3542.66677 | 16.76458 | 17496.58529 | 359.70997 | 0.74980  | 0.15304 | 275.71435 | 0.63320 |
| 2326 | 4877.53021 | 7.73615  | 9911.58562  | 430.34132 | -0.64508 | 0.00808 | 574.45229 | 0.22916 |
| 2327 | 2979.67433 | 16.89590 | 15479.82995 | 458.96374 | 2.69020  | 0.14377 | 484.34965 | 0.85011 |
| 2328 | 5181.96479 | 9.96667  | 15815.18401 | 46.88100  | -4.21483 | 0.00023 | 29.88768  | 1.45204 |
| 2329 | 4517.52604 | 20.87704 | 11724.61909 | 652.05207 | 4.48092  | 0.01477 | 763.48675 | 0.23899 |
| 2330 | 3884.18964 | 23.97063 | 12183.99943 | 599.84641 | 7.91488  | 0.01943 | 646.69004 | 0.05799 |
| 2331 | 2930.21673 | 20.06990 | 8221.08549  | 513.22833 | 4.33829  | 0.28411 | 401.30152 | 1.04717 |
| 2332 | 4674.71880 | 18.89124 | 12413.95168 | 509.70584 | 3.73149  | 0.04119 | 639.37819 | 0.38241 |
| 2333 | 4614.22356 | 22.37839 | 8688.31091  | 627.85892 | 2.73089  | 0.04172 | 766.28723 | 0.43435 |
| 2334 | 4613.09853 | 18.87283 | 8420.45057  | 305.55920 | 5.40728  | 0.03641 | 371.39085 | 0.30398 |
| 2335 | 3506.65097 | 15.35308 | 11550.17778 | 463.40619 | 2.81878  | 0.11033 | 399.45626 | 0.59151 |
| 2336 | 4451.33284 | 20.09941 | 13475.27340 | 513.89087 | 4.94240  | 0.10609 | 619.29349 | 0.32361 |
| 2337 | 3752.37395 | 12.38982 | 6473.90252  | 448.32246 | -1.53095 | 0.01422 | 526.82384 | 0.41641 |

|      |            |          |             |            |          |         |            |         |
|------|------------|----------|-------------|------------|----------|---------|------------|---------|
| 2338 | 2572.97377 | 15.17121 | 10598.04979 | 326.89285  | 6.02822  | 0.28122 | 244.87358  | 0.76759 |
| 2339 | 4789.87722 | 15.70302 | 7278.79148  | 476.63990  | 3.03255  | 0.01439 | 693.98971  | 0.21313 |
| 2340 | 4555.20157 | 22.52971 | 12740.43053 | 530.47270  | 5.24331  | 0.02710 | 651.05365  | 0.38624 |
| 2341 | 3905.26069 | 24.70289 | 10050.95898 | 914.37452  | 6.99403  | 0.01279 | 923.54458  | 0.36423 |
| 2342 | 4940.98818 | 13.04782 | 9533.94375  | 372.12149  | 2.01757  | 0.00959 | 553.08730  | 0.17748 |
| 2343 | 4572.91502 | 20.66338 | 17017.83625 | 385.62282  | 6.00379  | 0.09485 | 477.61786  | 0.49001 |
| 2344 | 4492.62260 | 12.53914 | 9304.27044  | 645.89053  | 0.02298  | 0.02917 | 777.09794  | 0.25263 |
| 2345 | 4806.39800 | 22.31979 | 10457.32026 | 589.09566  | 3.41735  | 0.01584 | 777.49937  | 0.25877 |
| 2346 | 3539.46534 | 17.33352 | 8060.46143  | 452.37818  | -0.90552 | 0.04188 | 468.11262  | 0.61948 |
| 2347 | 4144.80520 | 12.91683 | 12557.99318 | 228.19979  | -0.49088 | 0.00811 | 286.62323  | 0.17198 |
| 2348 | 4981.78530 | 17.73091 | 8858.37563  | 565.89575  | 1.46040  | 0.02389 | 748.93448  | 0.31833 |
| 2349 | 4778.49433 | 10.36964 | 11692.87169 | 615.05262  | -1.07297 | 0.01114 | 819.94805  | 0.14824 |
| 2350 | 3539.54678 | 17.33288 | 8062.76921  | 405.35292  | -0.53511 | 0.04202 | 403.08860  | 0.61202 |
| 2351 | 3619.62345 | 17.59129 | 17180.48996 | 452.71769  | -0.24574 | 0.09845 | 430.12114  | 0.90948 |
| 2352 | 4688.69342 | 15.32519 | 14186.91283 | 401.07285  | 4.56841  | 0.06786 | 569.87787  | 0.27789 |
| 2353 | 4341.64453 | 16.17648 | 9362.05572  | 508.49379  | 4.91448  | 0.10301 | 694.65578  | 0.46736 |
| 2354 | 4256.07303 | 23.32831 | 12451.53786 | 699.75934  | 5.15433  | 0.01023 | 871.60977  | 0.12075 |
| 2355 | 3150.89202 | 19.33146 | 8141.58360  | 462.65871  | 2.72569  | 0.15484 | 321.71808  | 1.92556 |
| 2356 | 3221.17302 | 14.53024 | 10090.34008 | 464.40908  | 3.77638  | 0.09251 | 502.17702  | 0.45204 |
| 2357 | 3887.25842 | 13.45029 | 10967.63515 | 391.76864  | -1.55580 | 0.03310 | 420.50767  | 0.50178 |
| 2358 | 3741.40949 | 11.72788 | 7562.94924  | 691.74896  | 2.49333  | 0.02269 | 665.17122  | 0.50950 |
| 2359 | 3193.34988 | 16.68929 | 7063.12492  | 334.43626  | 2.27649  | 0.10003 | 240.72861  | 0.63783 |
| 2360 | 4009.01546 | 23.17324 | 9971.53989  | 69.22334   | 4.43186  | 0.00422 | 30.33977   | 1.71795 |
| 2361 | 4852.67867 | 15.84567 | 8375.38715  | 413.15571  | 4.52618  | 0.03178 | 611.28100  | 0.18917 |
| 2362 | 3092.13341 | 19.64411 | 10588.83214 | 595.66850  | 3.35984  | 0.12845 | 473.13054  | 1.19788 |
| 2363 | 4709.08946 | 19.23042 | 12614.47125 | 480.63671  | 4.76958  | 0.08425 | 641.68658  | 0.57729 |
| 2364 | 5023.91388 | 18.26233 | 9242.57082  | 526.72227  | 1.60355  | 0.01770 | 756.98621  | 0.25443 |
| 2365 | 3174.33853 | 15.77323 | 12167.10007 | 289.08908  | 3.26414  | 0.10154 | 230.24096  | 0.71886 |
| 2366 | 3180.17942 | 15.86150 | 12249.90560 | 374.42247  | 3.10748  | 0.10338 | 315.26639  | 0.79293 |
| 2367 | 4569.85338 | 18.01702 | 8215.96145  | 391.71705  | 2.46775  | 0.03078 | 500.66095  | 0.26438 |
| 2368 | 4875.71934 | 7.72722  | 9706.54326  | 348.95454  | 1.09177  | 0.01026 | 471.88351  | 0.23288 |
| 2369 | 4637.56642 | 16.97925 | 10106.87475 | 247.94453  | 4.19603  | 0.05962 | 314.86220  | 0.53112 |
| 2370 | 3767.88802 | 9.58183  | 8372.91500  | 347.04421  | -0.00323 | 0.05596 | 287.26528  | 0.58372 |
| 2371 | 4576.73524 | 7.80929  | 8879.77550  | 216.69128  | -3.73853 | 0.00471 | 266.02185  | 0.15010 |
| 2372 | 5009.31037 | 9.93614  | 9447.27570  | 210.37487  | 0.71253  | 0.00441 | 294.56539  | 0.16765 |
| 2373 | 3743.03816 | 11.77840 | 7599.20011  | 769.40670  | 2.33022  | 0.02272 | 748.88998  | 0.54617 |
| 2374 | 4230.50869 | 18.87032 | 6830.24454  | 744.76319  | 2.88389  | 0.05487 | 829.41883  | 0.56790 |
| 2375 | 4785.89607 | 22.27319 | 10653.61988 | 524.60485  | 4.28767  | 0.05680 | 664.38810  | 0.50720 |
| 2376 | 3522.54918 | 17.28263 | 7926.65029  | 490.63461  | 1.17118  | 0.06679 | 490.26123  | 0.59651 |
| 2377 | 4795.69016 | 10.39292 | 11111.03173 | 543.57233  | 0.42230  | 0.02794 | 697.24941  | 0.44222 |
| 2378 | 4196.14291 | 23.81202 | 8462.41836  | 797.87280  | 2.12196  | 0.05297 | 896.27475  | 0.57816 |
| 2379 | 4749.72287 | 21.54992 | 20048.10232 | 510.59582  | 5.09915  | 0.03561 | 651.22424  | 0.37788 |
| 2380 | 4444.59187 | 20.51625 | 8239.87594  | 454.07506  | 5.95098  | 0.09425 | 490.93032  | 0.55360 |
| 2381 | 4605.33980 | 18.85638 | 8411.77144  | 494.28475  | 4.71984  | 0.04054 | 625.39269  | 0.31893 |
| 2382 | 4670.21450 | 16.61954 | 17902.28000 | 392.95574  | 4.41153  | 0.08858 | 537.62920  | 0.47539 |
| 2383 | 4175.88682 | 18.95136 | 8235.53220  | 746.34515  | 1.63426  | 0.03364 | 811.20759  | 0.56282 |
| 2384 | 4619.29351 | 18.62303 | 8321.95529  | 350.81916  | 3.47536  | 0.03338 | 438.25908  | 0.37527 |
| 2385 | 4510.38132 | 19.82187 | 7299.96719  | 558.27874  | 2.06289  | 0.05944 | 666.76148  | 0.43814 |
| 2386 | 4740.82899 | 21.70112 | 10172.84986 | 430.45502  | 4.70510  | 0.07555 | 513.05570  | 0.42526 |
| 2387 | 4896.96286 | 9.56913  | 10169.05837 | 367.45846  | -0.43109 | 0.02916 | 453.78717  | 0.34880 |
| 2388 | 4498.20465 | 21.04620 | 9879.34492  | 489.25758  | 5.92628  | 0.08487 | 577.07088  | 0.50986 |
| 2389 | 4931.49932 | 7.62264  | 9218.30312  | 324.98228  | -3.84398 | 0.00024 | 491.37061  | 0.02925 |
| 2390 | 4850.05870 | 13.26075 | 10596.25245 | 345.68920  | 1.42079  | 0.02250 | 517.08000  | 0.29878 |
| 2391 | 4899.00481 | 13.45624 | 8196.90874  | 347.01357  | 2.01996  | 0.01569 | 503.29346  | 0.24022 |
| 2392 | 4146.97162 | 16.43009 | 8916.06468  | 764.03643  | 1.22769  | 0.02579 | 818.17659  | 0.44664 |
| 2393 | 4381.13529 | 18.73002 | 8624.11864  | 651.66346  | 1.83635  | 0.03861 | 713.01879  | 0.38465 |
| 2394 | 2895.01534 | 16.57986 | 14318.39627 | 451.62595  | 4.42991  | 0.23408 | 426.17733  | 0.69950 |
| 2395 | 3766.98512 | 11.92333 | 9258.83533  | 712.22826  | 2.57361  | 0.03376 | 726.16178  | 0.60404 |
| 2396 | 3474.57662 | 13.92075 | 7297.42779  | 418.65001  | 2.10425  | 0.06365 | 317.52335  | 0.57161 |
| 2397 | 4875.79050 | 7.72743  | 9708.68399  | 349.02075  | 0.15442  | 0.01038 | 475.95755  | 0.22001 |
| 2398 | 3652.57488 | 23.85988 | 10476.78522 | 1029.32192 | 6.88498  | 0.06278 | 813.40462  | 1.17210 |
| 2399 | 3475.51852 | 13.94620 | 7309.52762  | 499.84124  | 2.18195  | 0.06382 | 426.74400  | 0.58741 |
| 2400 | 4417.26408 | 17.83413 | 7199.95331  | 582.33561  | 2.02822  | 0.03017 | 688.03344  | 0.32691 |
| 2401 | 3552.13937 | 23.36311 | 9232.58340  | 927.19153  | 7.39240  | 0.07054 | 693.84669  | 1.28559 |
| 2402 | 4464.68212 | 21.78155 | 7679.60677  | 494.74691  | 3.03225  | 0.02853 | 628.28901  | 0.33545 |
| 2403 | 3860.80096 | 24.40950 | 6378.66870  | 713.25268  | 2.46288  | 0.01842 | 669.25372  | 0.72473 |
| 2404 | 3705.93793 | 24.56108 | 6212.28491  | 534.62940  | 3.19062  | 0.03548 | 438.24689  | 0.49043 |
| 2405 | 4489.61198 | 21.03714 | 9251.18791  | 480.54728  | 3.15765  | 0.04400 | 616.80626  | 0.38087 |
| 2406 | 4264.58453 | 23.23654 | 11954.25751 | 950.31740  | 4.77386  | 0.00959 | 1113.35708 | 0.12572 |
| 2407 | 3361.45546 | 20.30847 | 10085.67210 | 150.76797  | 3.54868  | 0.01169 | 131.04059  | 1.08971 |
| 2408 | 4413.61264 | 22.71296 | 8343.66490  | 477.56670  | 2.51187  | 0.01464 | 621.92101  | 0.30532 |

|      |            |          |             |           |          |         |            |         |
|------|------------|----------|-------------|-----------|----------|---------|------------|---------|
| 2409 | 3372.17850 | 20.38693 | 10387.82253 | 159.56155 | 4.25075  | 0.01883 | 150.78900  | 0.92394 |
| 2410 | 4633.07048 | 15.36718 | 10142.18954 | 407.88029 | 4.26736  | 0.08986 | 568.55506  | 0.45270 |
| 2411 | 4784.33507 | 15.47568 | 7009.52155  | 346.26074 | 2.56088  | 0.01348 | 501.48592  | 0.22758 |
| 2412 | 3172.90197 | 20.08160 | 10396.12892 | 693.77722 | 4.12558  | 0.14077 | 551.36092  | 1.15902 |
| 2413 | 2897.94119 | 15.89189 | 15635.55889 | 347.10115 | 4.06247  | 0.21618 | 312.58458  | 0.83782 |
| 2414 | 4611.60765 | 22.34362 | 8663.49748  | 613.83320 | 3.40946  | 0.04561 | 734.30581  | 0.42974 |
| 2415 | 4774.13849 | 10.19649 | 11619.57630 | 391.31204 | -2.78051 | 0.00774 | 526.13662  | 0.19390 |
| 2416 | 2500.98522 | 14.41044 | 3911.77752  | 478.29619 | 5.60595  | 0.33880 | 536.80583  | 0.74801 |
| 2417 | 4469.87307 | 20.42886 | 13696.53065 | 559.88728 | 4.29939  | 0.10280 | 697.32300  | 0.47409 |
| 2418 | 4899.53955 | 16.87820 | 8794.57257  | 383.05073 | 2.72495  | 0.04424 | 495.50858  | 0.42415 |
| 2419 | 4421.78260 | 22.65797 | 8643.88636  | 586.21884 | 4.22755  | 0.01477 | 766.66372  | 0.29089 |
| 2420 | 2975.83349 | 24.93394 | 7153.81656  | 710.43798 | 6.52097  | 0.17022 | 505.43450  | 0.79482 |
| 2421 | 4419.15639 | 17.91608 | 7188.46911  | 568.82503 | 2.50443  | 0.03981 | 655.43708  | 0.38244 |
| 2422 | 2903.94553 | 15.87500 | 15715.69599 | 392.72091 | 3.82308  | 0.21779 | 361.49159  | 0.87477 |
| 2423 | 4490.56814 | 20.50035 | 16588.29640 | 920.98014 | 3.33276  | 0.01350 | 1060.06280 | 0.28179 |
| 2424 | 3609.51492 | 17.18085 | 17381.76555 | 373.41501 | -0.42838 | 0.10778 | 311.92248  | 0.95837 |
| 2425 | 3797.08450 | 24.11245 | 11009.76178 | 789.26823 | 3.11735  | 0.04007 | 760.18998  | 0.83960 |
| 2426 | 3564.11424 | 17.59224 | 7356.07308  | 545.46309 | 0.22698  | 0.10102 | 561.32602  | 0.84313 |
| 2427 | 4578.12394 | 20.70739 | 17344.43853 | 565.08100 | 5.05653  | 0.09246 | 742.23361  | 0.48386 |
| 2428 | 4243.83787 | 23.32789 | 12188.20586 | 683.78288 | 6.54778  | 0.01366 | 824.86344  | 0.12599 |
| 2429 | 4649.28703 | 22.36797 | 9744.65632  | 557.23787 | 3.01914  | 0.03473 | 692.43945  | 0.47462 |
| 2430 | 3142.35246 | 17.17986 | 9512.65248  | 594.56290 | 3.93496  | 0.15494 | 531.13067  | 0.66326 |
| 2431 | 4780.96173 | 10.44815 | 11863.81954 | 440.57171 | -1.72065 | 0.00831 | 596.86741  | 0.11130 |
| 2432 | 4702.65555 | 10.26767 | 13948.94809 | 56.06254  | 4.85227  | 0.00389 | 15.25001   | 0.29765 |
| 2433 | 4162.49023 | 12.47470 | 12399.08091 | 237.37259 | -1.79262 | 0.00456 | 294.91756  | 0.29197 |
| 2434 | 4704.65741 | 11.08687 | 15905.57851 | 145.76008 | 2.79944  | 0.00481 | 182.38309  | 0.19974 |
| 2435 | 4335.71820 | 19.37092 | 6377.94044  | 700.28985 | 2.07929  | 0.05823 | 776.04489  | 0.39302 |
| 2436 | 3097.41172 | 20.07746 | 10493.25260 | 469.00747 | 3.28162  | 0.17379 | 339.42594  | 0.99540 |
| 2437 | 4686.35592 | 21.33325 | 17793.47839 | 550.55373 | 4.32061  | 0.06853 | 690.29924  | 0.59599 |
| 2438 | 4929.56699 | 7.62732  | 8937.56662  | 342.71817 | -1.32781 | 0.00051 | 501.37634  | 0.03411 |
| 2439 | 4952.00846 | 10.71879 | 10113.05189 | 146.46320 | 1.25805  | 0.00314 | 187.06598  | 0.28448 |
| 2440 | 3576.04880 | 13.32512 | 5244.81627  | 640.80081 | 1.55594  | 0.03551 | 585.26886  | 0.69465 |
| 2441 | 4427.34512 | 17.36409 | 10707.02247 | 637.15871 | 2.42338  | 0.02868 | 692.77772  | 0.41388 |
| 2442 | 4419.54760 | 15.24468 | 23864.01145 | 70.30253  | -2.78828 | 0.00023 | 41.64745   | 0.26370 |
| 2443 | 3506.97222 | 15.35279 | 11615.47619 | 455.29434 | 1.71753  | 0.08760 | 414.92244  | 0.43215 |
| 2444 | 4598.92174 | 25.07693 | 8188.24516  | 43.88188  | 0.31195  | 0.00097 | 14.18037   | 2.01416 |
| 2445 | 4762.03697 | 21.57639 | 19683.07992 | 481.35059 | 4.35666  | 0.03718 | 614.92507  | 0.28683 |
| 2446 | 3767.41716 | 11.92585 | 9282.85593  | 689.92312 | 1.09466  | 0.03053 | 706.54027  | 0.64881 |
| 2447 | 4240.72963 | 17.37999 | 7592.59369  | 658.78782 | 0.51771  | 0.02250 | 763.87931  | 0.50667 |
| 2448 | 3908.93182 | 12.93124 | 12001.44030 | 403.19404 | 1.64533  | 0.04008 | 427.17988  | 0.50565 |
| 2449 | 4343.46965 | 16.21338 | 9349.60584  | 408.51094 | 5.55857  | 0.09094 | 549.78486  | 0.46720 |
| 2450 | 3365.93016 | 19.17410 | 18706.27628 | 424.92969 | 2.23002  | 0.10476 | 360.69760  | 1.07085 |
| 2451 | 3383.59853 | 7.69242  | 13549.10841 | 322.51751 | 1.10456  | 0.03015 | 266.16120  | 0.56644 |
| 2452 | 4608.47419 | 18.85667 | 7935.04630  | 415.13047 | 4.58574  | 0.03952 | 537.70796  | 0.25390 |
| 2453 | 4007.07258 | 17.12737 | 5809.15510  | 408.01142 | -3.67169 | 0.02665 | 463.82779  | 0.81256 |
| 2454 | 3776.83832 | 9.59434  | 8278.82283  | 445.95834 | -1.27283 | 0.04637 | 419.30506  | 0.60135 |
| 2455 | 4341.35652 | 16.17433 | 9326.99217  | 337.44106 | 5.83072  | 0.08426 | 443.50784  | 0.44091 |
| 2456 | 5021.05962 | 13.81835 | 8449.28651  | 360.52913 | 2.75468  | 0.01445 | 542.57138  | 0.20487 |
| 2457 | 4674.29247 | 18.89200 | 12412.61680 | 509.96200 | 4.50185  | 0.03858 | 639.42912  | 0.38472 |
| 2458 | 4909.76035 | 13.57860 | 8091.17503  | 409.98286 | 1.98749  | 0.01560 | 596.61494  | 0.22501 |
| 2459 | 4244.43793 | 17.30999 | 7628.18620  | 713.81311 | -0.82295 | 0.02073 | 809.12795  | 0.52046 |
| 2460 | 3151.37805 | 18.29095 | 10435.46279 | 398.63515 | 3.62740  | 0.18004 | 333.27823  | 0.79731 |
| 2461 | 3242.08532 | 18.34578 | 18280.15887 | 346.18645 | 2.98914  | 0.19537 | 193.64059  | 1.12144 |
| 2462 | 3822.32864 | 23.79450 | 12076.35829 | 718.48141 | 7.71053  | 0.02173 | 697.38553  | 0.06153 |
| 2463 | 4901.79467 | 9.90342  | 8171.98688  | 115.28243 | 1.09801  | 0.00530 | 123.56869  | 0.20771 |
| 2464 | 2784.91741 | 14.48007 | 13556.59802 | 407.47715 | 5.02125  | 0.25267 | 323.78558  | 0.92154 |
| 2465 | 3664.29370 | 21.30048 | 13459.65924 | 103.31484 | 3.57291  | 0.01634 | 53.38885   | 0.82673 |
| 2466 | 4961.13105 | 8.66482  | 9381.50438  | 223.07051 | 0.00573  | 0.00293 | 311.14344  | 0.12711 |
| 2467 | 4753.96640 | 8.35917  | 9943.36377  | 298.83451 | -3.89181 | 0.00311 | 410.44613  | 0.10482 |
| 2468 | 4764.91390 | 18.34651 | 10677.73075 | 598.58531 | 0.90705  | 0.04040 | 779.33179  | 0.32382 |
| 2469 | 4651.98808 | 22.42020 | 9640.70799  | 625.94079 | 2.14905  | 0.03373 | 801.58640  | 0.43252 |
| 2470 | 3575.27493 | 13.32872 | 5141.11501  | 636.01359 | 2.62454  | 0.04008 | 569.49242  | 0.74168 |
| 2471 | 4505.02302 | 19.76664 | 7307.37169  | 540.58520 | 2.73464  | 0.06124 | 654.01021  | 0.42931 |
| 2472 | 4606.82395 | 18.93924 | 8434.84959  | 496.45125 | 4.63613  | 0.03880 | 643.44418  | 0.31410 |
| 2473 | 4749.20879 | 14.79637 | 9636.66699  | 328.69495 | 2.49241  | 0.05788 | 447.30500  | 0.58290 |
| 2474 | 4709.16237 | 19.22977 | 12614.45669 | 440.37624 | 4.76911  | 0.08557 | 585.08676  | 0.58201 |
| 2475 | 4439.38152 | 20.44412 | 8193.33260  | 533.59183 | 4.13713  | 0.09203 | 623.20556  | 0.43439 |
| 2476 | 2525.98128 | 26.32029 | 10833.05959 | 532.91259 | 8.57968  | 0.18956 | 230.67946  | 1.39103 |
| 2477 | 4885.63108 | 9.31646  | 12567.23554 | 328.22340 | 1.47887  | 0.01583 | 479.40811  | 0.27396 |
| 2478 | 4032.98361 | 13.09092 | 15554.25822 | 123.61030 | -1.95150 | 0.00254 | 124.90754  | 0.57163 |
| 2479 | 5022.75006 | 18.25443 | 10075.11387 | 206.85187 | 2.45734  | 0.01867 | 268.40119  | 0.17692 |

|      |            |          |             |            |          |         |            |         |
|------|------------|----------|-------------|------------|----------|---------|------------|---------|
| 2480 | 4575.96533 | 7.76079  | 9006.60427  | 304.17966  | -2.92329 | 0.00388 | 411.30607  | 0.11343 |
| 2481 | 2549.43188 | 26.38441 | 11329.73485 | 507.58176  | 8.82931  | 0.19703 | 228.34261  | 1.42612 |
| 2482 | 3898.41942 | 24.64831 | 10005.40640 | 876.53717  | 7.54049  | 0.01522 | 841.35243  | 0.27614 |
| 2483 | 4244.50583 | 17.30521 | 7629.75981  | 579.14389  | -0.48239 | 0.02146 | 652.46164  | 0.53669 |
| 2484 | 4668.75017 | 20.13924 | 8192.00807  | 391.32759  | 5.02332  | 0.04744 | 529.80068  | 0.29659 |
| 2485 | 5002.97705 | 7.77945  | 14891.02438 | 172.12404  | -0.55687 | 0.00190 | 244.74680  | 0.08606 |
| 2486 | 4252.77871 | 23.26290 | 13467.33839 | 885.39433  | 2.97565  | 0.01041 | 1051.18510 | 0.13325 |
| 2487 | 4574.00572 | 7.98626  | 8891.51929  | 291.03494  | -3.37442 | 0.00538 | 386.34893  | 0.17298 |
| 2488 | 3608.80637 | 13.27101 | 20219.03065 | 316.48586  | 1.22062  | 0.02252 | 387.69954  | 0.35625 |
| 2489 | 2463.34783 | 13.74069 | 4282.81968  | 385.57419  | 5.82074  | 0.28313 | 383.60259  | 0.67949 |
| 2490 | 4513.95818 | 19.81663 | 7361.70516  | 628.57180  | 1.36680  | 0.04454 | 766.18528  | 0.45264 |
| 2491 | 3735.99698 | 11.49850 | 8795.09195  | 489.91217  | -0.28097 | 0.03181 | 456.76205  | 0.60589 |
| 2492 | 3916.88369 | 12.49537 | 12350.44584 | 187.95956  | -0.74818 | 0.00962 | 197.84459  | 0.52142 |
| 2493 | 3872.32283 | 23.94983 | 12156.89968 | 690.98935  | 8.22174  | 0.02262 | 773.74855  | 0.05473 |
| 2494 | 4688.36442 | 13.77096 | 9709.36217  | 447.84494  | 2.93056  | 0.02103 | 547.03538  | 0.23117 |
| 2495 | 4848.64892 | 12.79144 | 13344.08020 | 387.04191  | 4.44241  | 0.02562 | 542.76151  | 0.21153 |
| 2496 | 3128.21179 | 19.65301 | 10495.17223 | 611.70021  | 2.95357  | 0.13349 | 440.86514  | 1.23441 |
| 2497 | 5020.02830 | 13.79711 | 8488.82256  | 390.11545  | 2.78492  | 0.01786 | 572.47665  | 0.16886 |
| 2498 | 3944.84918 | 20.04726 | 9126.50811  | 678.11235  | 6.89834  | 0.06028 | 529.89103  | 0.71823 |
| 2499 | 4712.38163 | 15.82544 | 11104.20421 | 429.64158  | 5.36960  | 0.05746 | 566.66266  | 0.30472 |
| 2500 | 5112.91293 | 10.97733 | 14650.01519 | 147.32210  | 1.68007  | 0.00293 | 191.74697  | 0.09865 |
| 2501 | 3947.42221 | 20.27787 | 11864.87082 | 106.15620  | 3.09873  | 0.01435 | 71.89549   | 0.96922 |
| 2502 | 4070.05998 | 25.69407 | 8963.45949  | 749.87674  | 2.88766  | 0.01264 | 772.52168  | 0.39332 |
| 2503 | 4714.35492 | 15.85305 | 11380.31004 | 426.79727  | 5.80164  | 0.04873 | 571.26234  | 0.37335 |
| 2504 | 4691.97380 | 15.39035 | 14148.05890 | 468.26144  | 3.72452  | 0.06450 | 662.87096  | 0.34815 |
| 2505 | 4128.02248 | 12.79202 | 12669.64910 | 373.14687  | 0.16213  | 0.00988 | 495.54166  | 0.21002 |
| 2506 | 4795.63601 | 10.38892 | 11106.24851 | 613.96277  | 0.55744  | 0.02683 | 790.52962  | 0.42027 |
| 2507 | 3902.33130 | 14.35872 | 18606.97725 | 146.27329  | -0.55332 | 0.00446 | 146.02528  | 0.53876 |
| 2508 | 4856.13409 | 13.76462 | 12127.04988 | 343.63771  | 1.24985  | 0.03333 | 414.44671  | 0.46864 |
| 2509 | 5012.36080 | 6.81914  | 8863.33646  | 279.03216  | -0.70833 | 0.00126 | 416.40752  | 0.03298 |
| 2510 | 4290.91679 | 18.12631 | 6896.94511  | 642.14824  | 2.27610  | 0.05582 | 703.70658  | 0.43073 |
| 2511 | 4756.12139 | 14.73119 | 11416.92047 | 430.94073  | 2.94697  | 0.02378 | 621.28363  | 0.33966 |
| 2512 | 3435.88173 | 8.15427  | 13753.86287 | 405.98810  | 1.25840  | 0.03277 | 442.03766  | 0.41794 |
| 2513 | 3830.57282 | 13.84848 | 18717.14834 | 174.23228  | -0.30392 | 0.00344 | 194.92027  | 0.44436 |
| 2514 | 4842.86022 | 12.64716 | 14469.37843 | 317.00366  | 3.50471  | 0.02571 | 437.08362  | 0.24066 |
| 2515 | 2573.59478 | 15.52303 | 11045.00439 | 441.99722  | 4.84845  | 0.30747 | 437.56788  | 0.79534 |
| 2516 | 4875.76681 | 7.72794  | 9707.70011  | 347.20399  | 0.79721  | 0.00956 | 475.41151  | 0.23706 |
| 2517 | 4753.38928 | 21.57754 | 20075.45621 | 468.24166  | 4.73181  | 0.03191 | 611.18667  | 0.33940 |
| 2518 | 4845.85684 | 12.74376 | 15168.52240 | 424.17919  | 3.37390  | 0.02443 | 593.45297  | 0.32729 |
| 2519 | 4829.46836 | 14.35347 | 10773.22765 | 289.75749  | 3.11145  | 0.03383 | 430.50777  | 0.19777 |
| 2520 | 4637.27978 | 20.74604 | 9172.86095  | 403.40229  | 4.73810  | 0.07780 | 460.23082  | 0.52522 |
| 2521 | 3522.82878 | 17.29891 | 7878.62431  | 515.79001  | 0.25123  | 0.05833 | 562.23107  | 0.59543 |
| 2522 | 5112.82009 | 10.95854 | 14085.73426 | 127.32624  | -0.31472 | 0.00254 | 157.66566  | 0.14335 |
| 2523 | 3919.84650 | 18.57142 | 6921.82489  | 799.43640  | 6.58752  | 0.05731 | 734.70787  | 0.63664 |
| 2524 | 3775.32285 | 24.17441 | 10915.42779 | 722.68312  | 3.09229  | 0.04732 | 650.35937  | 0.77924 |
| 2525 | 4573.70047 | 9.82702  | 17282.00968 | 69.56575   | -3.21467 | 0.00264 | 59.28338   | 1.21091 |
| 2526 | 4613.15056 | 7.61877  | 10867.64172 | 86.12477   | -3.37407 | 0.00042 | 89.77667   | 0.90320 |
| 2527 | 3703.91365 | 7.83782  | 6097.45097  | 303.04648  | -1.92111 | 0.02104 | 277.95176  | 0.52116 |
| 2528 | 3576.53133 | 23.27185 | 9359.07408  | 1251.55924 | 8.90144  | 0.07373 | 1004.99600 | 1.29448 |
| 2529 | 4367.05910 | 18.89316 | 9561.18132  | 541.36093  | 3.31991  | 0.04501 | 611.10897  | 0.38672 |
| 2530 | 4612.02963 | 22.34859 | 8671.73784  | 567.71734  | 3.25660  | 0.04806 | 680.00318  | 0.42686 |
| 2531 | 3800.31339 | 19.95559 | 11684.55905 | 465.66124  | -1.72533 | 0.07955 | 474.52069  | 0.86834 |
| 2532 | 3539.50459 | 9.35704  | 7250.58792  | 626.87192  | 3.24628  | 0.04628 | 576.66521  | 0.58600 |
| 2533 | 3241.01694 | 18.21821 | 18154.97397 | 476.77802  | 3.08049  | 0.21263 | 411.38522  | 1.09856 |
| 2534 | 3134.90563 | 15.57934 | 6707.46701  | 312.63951  | 1.45072  | 0.01415 | 259.90228  | 0.19066 |
| 2535 | 4005.94226 | 9.86276  | 9376.61962  | 332.23380  | -2.18481 | 0.00727 | 419.43868  | 0.20240 |
| 2536 | 3703.52891 | 7.83997  | 6095.24412  | 439.74867  | -0.75609 | 0.02346 | 470.04011  | 0.46691 |
| 2537 | 4634.75663 | 20.74429 | 9153.52050  | 602.57753  | 3.00690  | 0.07632 | 744.49194  | 0.51253 |
| 2538 | 4737.87504 | 15.91440 | 12186.75124 | 413.37612  | 3.51237  | 0.04722 | 571.40327  | 0.42244 |
| 2539 | 3768.53121 | 9.57247  | 8322.75677  | 337.38892  | -0.56154 | 0.05229 | 297.00459  | 0.59092 |
| 2540 | 4504.91907 | 16.73532 | 8478.04796  | 546.57568  | -0.99753 | 0.03096 | 652.29929  | 0.29050 |
| 2541 | 4090.18472 | 18.97506 | 6760.05877  | 681.04714  | 3.85582  | 0.06363 | 673.08929  | 0.61752 |
| 2542 | 2875.52337 | 16.59796 | 13976.50490 | 437.37981  | 4.74558  | 0.23627 | 384.93395  | 0.74452 |
| 2543 | 4769.86189 | 21.59470 | 19741.70132 | 550.76864  | 3.56206  | 0.03666 | 726.90524  | 0.26648 |
| 2544 | 3802.76532 | 23.72086 | 12054.08030 | 808.71997  | 7.09737  | 0.02365 | 813.09757  | 0.05350 |
| 2545 | 4785.44719 | 15.63505 | 6999.53576  | 467.38174  | 3.12151  | 0.01476 | 674.67605  | 0.19204 |
| 2546 | 3791.82304 | 24.13686 | 10976.05328 | 718.11460  | 2.63938  | 0.04195 | 597.06489  | 0.80789 |
| 2547 | 4576.02437 | 10.21659 | 9304.07890  | 399.44803  | -3.09292 | 0.01995 | 495.84720  | 0.18377 |
| 2548 | 4240.29094 | 17.38555 | 7589.21471  | 668.00691  | 0.41821  | 0.02217 | 763.48779  | 0.51333 |
| 2549 | 2897.15906 | 19.79402 | 7736.52795  | 605.69048  | 4.18460  | 0.26913 | 419.12613  | 1.08835 |
| 2550 | 4514.26811 | 19.82415 | 7361.20145  | 498.15825  | 0.31712  | 0.04748 | 601.51067  | 0.45548 |



|      |            |          |             |           |          |         |           |         |
|------|------------|----------|-------------|-----------|----------|---------|-----------|---------|
| 2551 | 4237.20535 | 23.41855 | 12384.66172 | 860.39858 | 3.46502  | 0.01111 | 980.70903 | 0.15863 |
| 2552 | 4763.99326 | 18.37540 | 10640.25999 | 499.02880 | 1.88958  | 0.04596 | 634.51325 | 0.32283 |
| 2553 | 4769.99630 | 21.64556 | 20259.61830 | 619.03293 | 4.12295  | 0.03534 | 809.98848 | 0.33886 |
| 2554 | 4197.53506 | 17.11793 | 14560.55823 | 67.36537  | 1.15140  | 0.00812 | 25.46749  | 1.57160 |
| 2555 | 3934.28158 | 20.26411 | 12144.87788 | 98.77237  | 1.78983  | 0.01362 | 63.25311  | 0.94262 |
| 2556 | 4636.65486 | 15.34586 | 10140.16339 | 514.54145 | 3.58170  | 0.09965 | 724.16796 | 0.41597 |
| 2557 | 4575.01862 | 10.41928 | 9311.76559  | 410.55690 | -1.58198 | 0.02389 | 485.03932 | 0.19710 |
| 2558 | 3626.43511 | 23.25162 | 5141.12630  | 525.66970 | 8.07503  | 0.07496 | 470.18167 | 0.51054 |
| 2559 | 3860.35515 | 23.88125 | 12071.71950 | 811.41708 | 7.69357  | 0.01967 | 817.63460 | 0.06402 |
| 2560 | 3218.48294 | 16.52629 | 12226.09801 | 382.77160 | 2.57401  | 0.08118 | 314.03953 | 0.77355 |
| 2561 | 4314.90399 | 21.89128 | 8572.21123  | 818.53973 | 2.14383  | 0.03338 | 822.24464 | 0.53639 |
| 2562 | 3692.46561 | 14.11167 | 10407.30269 | 481.13613 | -0.77947 | 0.05449 | 478.86143 | 0.69245 |
| 2563 | 5113.44050 | 11.74621 | 10134.30419 | 48.60848  | -1.85430 | 0.00046 | 18.98529  | 0.46755 |
| 2564 | 4660.22374 | 19.52318 | 12317.07356 | 425.19904 | 6.41059  | 0.10786 | 568.72445 | 0.42397 |
| 2565 | 4072.32442 | 25.68966 | 8973.21817  | 673.98942 | 3.12422  | 0.01063 | 699.03939 | 0.44753 |
| 2566 | 3610.10798 | 13.22942 | 20578.26835 | 342.39884 | 0.86924  | 0.01754 | 436.64247 | 0.26110 |
| 2567 | 4746.04733 | 21.52999 | 19989.53127 | 593.97773 | 3.73773  | 0.03389 | 753.32948 | 0.35797 |
| 2568 | 4975.64823 | 10.29507 | 8743.99288  | 305.23422 | 1.64425  | 0.00449 | 459.28615 | 0.17122 |
| 2569 | 4463.68807 | 21.74975 | 7683.78039  | 464.27691 | 3.26046  | 0.02883 | 594.48927 | 0.33576 |
| 2570 | 3487.65280 | 13.77723 | 7413.86809  | 520.37466 | 0.98806  | 0.05164 | 478.40284 | 0.71800 |
| 2571 | 4728.76300 | 18.49122 | 8905.06103  | 62.44252  | -0.76884 | 0.00122 | 49.51163  | 1.60913 |
| 2572 | 2491.79896 | 14.33901 | 3870.91876  | 396.43558 | 5.89791  | 0.31236 | 400.54010 | 0.60776 |
| 2573 | 4969.25874 | 9.91475  | 8502.82312  | 383.53392 | 1.42510  | 0.00901 | 545.05122 | 0.14224 |
| 2574 | 4185.89715 | 23.77406 | 8408.43590  | 744.50787 | 3.24385  | 0.06148 | 808.84242 | 0.55489 |
| 2575 | 4526.75520 | 25.36761 | 9140.34528  | 45.60275  | 2.34273  | 0.00121 | 11.49701  | 1.31656 |
| 2576 | 4497.34535 | 12.63604 | 9343.80755  | 514.93104 | 0.14056  | 0.02340 | 619.34804 | 0.32481 |
| 2577 | 4784.25668 | 15.47689 | 7007.50424  | 408.06000 | 2.83853  | 0.01394 | 592.15892 | 0.22397 |
| 2578 | 4428.22911 | 17.35440 | 10709.46852 | 773.03334 | 2.25539  | 0.02955 | 841.24939 | 0.37969 |
| 2579 | 4813.90005 | 20.77453 | 7721.75782  | 659.53752 | 3.08030  | 0.05438 | 823.76767 | 0.38776 |
| 2580 | 3502.78848 | 15.32912 | 11563.18775 | 345.22174 | 1.58390  | 0.08930 | 279.17820 | 0.41956 |
| 2581 | 4260.30637 | 23.25508 | 11972.61544 | 671.44900 | 3.94612  | 0.00885 | 802.64800 | 0.12928 |
| 2582 | 4576.25828 | 10.23522 | 9305.74796  | 434.11415 | -2.41660 | 0.01848 | 554.63416 | 0.20394 |
| 2583 | 4851.37426 | 15.83576 | 8853.66389  | 422.49872 | 3.50514  | 0.02941 | 627.63577 | 0.25535 |
| 2584 | 4650.08810 | 20.88659 | 9238.63844  | 554.15709 | 3.93802  | 0.09040 | 673.48734 | 0.50170 |
| 2585 | 3766.22286 | 11.90091 | 9278.58687  | 670.16812 | 1.57571  | 0.03144 | 679.50068 | 0.65819 |
| 2586 | 3515.77054 | 9.35028  | 8271.69436  | 437.81779 | -0.84330 | 0.02808 | 374.52364 | 0.45426 |
| 2587 | 2900.11741 | 16.52244 | 14687.38129 | 321.99625 | 4.28066  | 0.18909 | 228.05325 | 0.71422 |
| 2588 | 4006.92796 | 9.90979  | 9415.20779  | 324.24474 | -2.66505 | 0.00885 | 380.88287 | 0.16740 |
| 2589 | 4365.88627 | 18.84966 | 9565.36612  | 542.51516 | 3.36487  | 0.04736 | 613.06977 | 0.38819 |
| 2590 | 3195.95527 | 16.73710 | 7078.84995  | 385.20401 | 1.27529  | 0.08381 | 302.50522 | 0.68137 |
| 2591 | 4335.60410 | 18.30166 | 6879.89378  | 607.46485 | 3.83512  | 0.03039 | 663.90861 | 0.52477 |
| 2592 | 4062.63730 | 9.14303  | 11572.98824 | 170.79341 | -1.36115 | 0.00542 | 227.48560 | 0.11589 |
| 2593 | 4648.02429 | 22.38144 | 9669.78643  | 622.41289 | 2.69822  | 0.03487 | 785.02286 | 0.49034 |
| 2594 | 3862.12399 | 23.85412 | 7247.58366  | 537.25594 | 6.02953  | 0.06398 | 562.56526 | 0.44516 |
| 2595 | 4918.00313 | 10.76280 | 8765.14864  | 181.30068 | 1.90565  | 0.00518 | 249.39180 | 0.10486 |
| 2596 | 3914.43788 | 12.95193 | 12059.44888 | 426.35882 | 0.08489  | 0.03526 | 502.40123 | 0.44301 |
| 2597 | 4607.32961 | 22.28785 | 8650.78942  | 517.80802 | 0.64644  | 0.04099 | 648.68983 | 0.38318 |
| 2598 | 4831.53766 | 14.36273 | 11013.05148 | 379.36811 | 2.74384  | 0.03072 | 570.13280 | 0.21026 |
| 2599 | 3930.28229 | 18.58929 | 7283.75961  | 539.06578 | 5.57427  | 0.05753 | 451.45934 | 0.63920 |
| 2600 | 3475.67046 | 13.91511 | 7315.33680  | 486.62121 | 2.29844  | 0.05636 | 404.36500 | 0.59677 |
| 2601 | 4503.25281 | 16.72430 | 8462.66779  | 495.50309 | -0.55798 | 0.02696 | 595.51554 | 0.28019 |
| 2602 | 4004.12499 | 9.96480  | 9308.05408  | 367.67713 | -1.74418 | 0.01150 | 454.56809 | 0.16176 |
| 2603 | 4692.26158 | 15.38905 | 14144.31537 | 409.08866 | 3.79224  | 0.05974 | 574.58028 | 0.35236 |
| 2604 | 2447.28425 | 13.76738 | 3906.96748  | 379.90355 | 6.47696  | 0.26611 | 447.75066 | 0.65272 |
| 2605 | 4371.76848 | 20.42120 | 9908.84743  | 520.07371 | 2.70418  | 0.04904 | 567.19204 | 0.43566 |
| 2606 | 4547.46873 | 20.96336 | 12103.06340 | 623.41357 | 2.39362  | 0.01177 | 749.79947 | 0.24434 |
| 2607 | 4440.36773 | 15.62990 | 24380.38312 | 89.60561  | -0.98996 | 0.00046 | 67.91999  | 0.36093 |
| 2608 | 4087.39611 | 22.33533 | 7817.82074  | 67.61424  | 3.95503  | 0.00322 | 37.51684  | 1.78343 |
| 2609 | 4897.26616 | 12.82575 | 7285.99626  | 486.27075 | 2.38757  | 0.04052 | 665.59432 | 0.32029 |
| 2610 | 4975.31406 | 10.28355 | 8740.32796  | 275.76310 | 2.14842  | 0.00419 | 424.15856 | 0.16250 |
| 2611 | 3436.28344 | 8.16375  | 13754.93714 | 315.50473 | 1.17182  | 0.03427 | 308.54313 | 0.36404 |
| 2612 | 3736.07286 | 11.64470 | 8704.50719  | 612.75981 | 2.22007  | 0.03413 | 618.46374 | 0.54071 |
| 2613 | 4380.86334 | 18.86784 | 8603.63094  | 551.63004 | 2.13583  | 0.04043 | 605.08416 | 0.42354 |
| 2614 | 4581.40914 | 18.00644 | 8193.76254  | 433.01255 | 1.93979  | 0.02587 | 569.91039 | 0.29372 |
| 2615 | 4265.43388 | 16.21725 | 7762.58080  | 637.96835 | 1.94293  | 0.05111 | 695.47966 | 0.46085 |
| 2616 | 4462.41437 | 21.00627 | 9400.09183  | 660.98325 | 2.85231  | 0.04380 | 845.73116 | 0.37443 |
| 2617 | 4628.28352 | 15.31576 | 8228.27739  | 396.68977 | 4.71673  | 0.10188 | 550.03262 | 0.46508 |
| 2618 | 4254.73629 | 18.97590 | 7159.28960  | 721.87713 | 3.06157  | 0.04148 | 763.52049 | 0.46348 |
| 2619 | 3516.66160 | 9.37671  | 8292.17795  | 383.70972 | -1.44402 | 0.02863 | 305.64669 | 0.46825 |
| 2620 | 4827.98459 | 14.30757 | 10785.71110 | 372.76958 | 3.03843  | 0.03183 | 561.60415 | 0.20199 |
| 2621 | 4640.38000 | 20.15072 | 8045.89668  | 321.96179 | 4.09629  | 0.04221 | 437.78877 | 0.33692 |

|      |            |          |             |            |          |         |            |         |
|------|------------|----------|-------------|------------|----------|---------|------------|---------|
| 2622 | 5021.78693 | 18.22708 | 10073.63431 | 410.55967  | 2.60347  | 0.01787 | 600.61296  | 0.18504 |
| 2623 | 3631.94205 | 23.26975 | 5163.49855  | 532.46002  | 8.40591  | 0.08771 | 490.50805  | 0.39965 |
| 2624 | 4851.34555 | 13.64115 | 11906.89191 | 472.63243  | 2.16107  | 0.03826 | 596.26684  | 0.49095 |
| 2625 | 4337.29415 | 19.39587 | 6380.76292  | 610.79055  | 1.58681  | 0.04875 | 678.99595  | 0.42629 |
| 2626 | 4503.91149 | 16.67514 | 8873.72064  | 616.95628  | 0.23387  | 0.03867 | 738.35961  | 0.43918 |
| 2627 | 3375.61567 | 20.19893 | 10613.36478 | 175.43676  | 5.09575  | 0.01841 | 165.44814  | 1.00337 |
| 2628 | 4145.83067 | 16.45448 | 8949.71399  | 632.34096  | 0.26478  | 0.02176 | 706.99679  | 0.37423 |
| 2629 | 4940.77081 | 13.03424 | 9346.90700  | 296.47570  | 0.98867  | 0.00958 | 435.24645  | 0.18605 |
| 2630 | 4690.01697 | 15.36397 | 14132.05787 | 434.65197  | 4.19450  | 0.06168 | 615.94140  | 0.28149 |
| 2631 | 3581.84441 | 13.19236 | 5368.07331  | 504.38362  | 0.71925  | 0.04299 | 453.29761  | 0.56952 |
| 2632 | 4565.49226 | 20.60717 | 17836.00346 | 425.21333  | 6.80507  | 0.07713 | 547.45857  | 0.48105 |
| 2633 | 3843.97898 | 20.19938 | 6352.71338  | 590.80696  | 2.30184  | 0.02403 | 579.38715  | 0.53535 |
| 2634 | 3627.76754 | 23.26217 | 5169.00105  | 587.78576  | 7.53021  | 0.07461 | 605.27194  | 0.47065 |
| 2635 | 4941.28777 | 13.05019 | 9535.91664  | 303.96123  | 1.62549  | 0.00928 | 448.08600  | 0.17458 |
| 2636 | 4468.96504 | 22.78234 | 7303.17271  | 312.25406  | 6.84093  | 0.12796 | 310.64707  | 0.71040 |
| 2637 | 4410.51747 | 22.75563 | 8381.22160  | 535.83305  | 4.02581  | 0.01496 | 716.00896  | 0.29640 |
| 2638 | 3641.01860 | 12.69026 | 22454.38984 | 239.90200  | 0.36703  | 0.02222 | 238.13163  | 0.47860 |
| 2639 | 4669.82188 | 16.59335 | 17879.79838 | 265.57340  | 4.47000  | 0.08754 | 349.93500  | 0.46873 |
| 2640 | 2916.12146 | 20.11416 | 8036.39341  | 672.63095  | 5.52665  | 0.28132 | 540.76782  | 1.00136 |
| 2641 | 4922.96226 | 19.96020 | 11508.62992 | 280.15028  | 1.74775  | 0.05330 | 360.31475  | 0.39807 |
| 2642 | 4497.05542 | 21.28612 | 8795.02955  | 644.04450  | 4.61686  | 0.07967 | 739.59403  | 0.61940 |
| 2643 | 4968.46816 | 9.88004  | 8898.53500  | 377.93653  | 0.49806  | 0.00786 | 538.59806  | 0.14385 |
| 2644 | 4774.23677 | 10.19693 | 11719.84673 | 468.95452  | -1.98871 | 0.00758 | 633.91214  | 0.19163 |
| 2645 | 4230.85044 | 18.87187 | 6825.40633  | 743.27435  | 3.07455  | 0.05391 | 801.26883  | 0.55184 |
| 2646 | 4632.65076 | 20.68290 | 9163.19084  | 492.18387  | 4.35925  | 0.07980 | 590.56792  | 0.51663 |
| 2647 | 3852.99931 | 24.44218 | 6293.82225  | 929.45910  | 3.45311  | 0.01732 | 908.20021  | 0.86187 |
| 2648 | 4425.22916 | 17.35566 | 10702.62264 | 669.49410  | 2.77673  | 0.03060 | 748.09455  | 0.36946 |
| 2649 | 4825.43090 | 20.85039 | 7824.39821  | 584.14843  | 2.85927  | 0.06216 | 732.94038  | 0.35524 |
| 2650 | 3393.47737 | 9.61392  | 6808.25901  | 348.97316  | 1.02293  | 0.04989 | 317.43982  | 0.54525 |
| 2651 | 3210.31636 | 17.11331 | 6860.43174  | 257.59138  | 2.49180  | 0.08831 | 118.59183  | 0.73448 |
| 2652 | 3698.52027 | 7.77219  | 6051.25904  | 315.08154  | -1.75167 | 0.02110 | 293.45097  | 0.51847 |
| 2653 | 4763.34065 | 14.80278 | 10448.77085 | 328.21938  | 3.84083  | 0.02439 | 472.02818  | 0.34722 |
| 2654 | 4767.80223 | 14.72996 | 11093.57927 | 380.40088  | 1.81182  | 0.02024 | 541.34248  | 0.38687 |
| 2655 | 4911.78951 | 12.72692 | 7713.45419  | 443.37372  | 3.37418  | 0.03687 | 604.11421  | 0.33656 |
| 2656 | 3376.01627 | 20.34426 | 10250.65174 | 109.08670  | 4.22323  | 0.02038 | 67.82154   | 0.99415 |
| 2657 | 4895.88277 | 9.53861  | 10146.71295 | 576.25646  | 0.21565  | 0.03010 | 739.89250  | 0.37567 |
| 2658 | 2989.06240 | 16.94582 | 15664.86510 | 275.35050  | 3.40455  | 0.13957 | 236.60630  | 0.85424 |
| 2659 | 4506.64294 | 16.70110 | 8502.11439  | 502.78957  | 0.61284  | 0.03305 | 566.63815  | 0.42965 |
| 2660 | 3754.30144 | 12.36835 | 6483.95423  | 338.11518  | -0.26675 | 0.01744 | 343.55863  | 0.41084 |
| 2661 | 4680.39365 | 21.50329 | 9186.28558  | 375.64003  | 3.32988  | 0.05586 | 434.42745  | 0.53230 |
| 2662 | 3505.05301 | 9.34924  | 8000.26134  | 428.42795  | -0.38979 | 0.03320 | 350.08274  | 0.48290 |
| 2663 | 3129.21807 | 15.47947 | 6631.71863  | 294.63286  | 0.46457  | 0.01114 | 243.80442  | 0.29179 |
| 2664 | 3505.37018 | 9.31170  | 8026.68474  | 434.51660  | 0.02475  | 0.03803 | 378.03119  | 0.49408 |
| 2665 | 4182.57010 | 12.15485 | 13382.62876 | 245.65659  | -1.52192 | 0.00495 | 300.91423  | 0.32854 |
| 2666 | 3504.58360 | 15.31812 | 11544.09149 | 446.79421  | 1.65376  | 0.08982 | 398.25096  | 0.50449 |
| 2667 | 4972.50998 | 8.57729  | 9515.13127  | 296.97269  | -0.35420 | 0.00300 | 444.16793  | 0.12212 |
| 2668 | 3338.17609 | 24.30997 | 11585.35063 | 552.85158  | 3.67017  | 0.06423 | 470.73117  | 0.48921 |
| 2669 | 3981.52315 | 22.92824 | 7885.89425  | 780.95326  | 2.01554  | 0.03469 | 751.45621  | 0.54577 |
| 2670 | 4463.09339 | 20.96545 | 9281.32516  | 505.73579  | 3.92820  | 0.04795 | 654.03280  | 0.31108 |
| 2671 | 4614.70544 | 22.39005 | 8682.88927  | 658.97012  | 1.53355  | 0.04135 | 829.51786  | 0.42958 |
| 2672 | 3395.87323 | 11.72104 | 7556.49849  | 550.39243  | 2.49297  | 0.08133 | 462.54666  | 0.69959 |
| 2673 | 5264.68827 | 12.85828 | 10610.06388 | 37.87803   | -2.44595 | 0.00011 | 9.22878    | 1.40226 |
| 2674 | 2549.57544 | 15.26083 | 3785.55051  | 471.80175  | 5.16452  | 0.30583 | 495.66177  | 1.78906 |
| 2675 | 4342.43333 | 16.19506 | 9349.81475  | 287.46035  | 6.53796  | 0.09763 | 372.57125  | 0.46238 |
| 2676 | 3990.34239 | 10.33519 | 12698.13078 | 173.69095  | -1.66049 | 0.00404 | 171.87817  | 0.25398 |
| 2677 | 4313.27611 | 21.89931 | 8570.91546  | 609.96832  | 2.14368  | 0.03197 | 622.90921  | 0.56653 |
| 2678 | 4846.77413 | 13.59525 | 12176.07702 | 492.90121  | 1.38748  | 0.03296 | 628.34800  | 0.46237 |
| 2679 | 3735.99642 | 11.63419 | 8717.04021  | 526.23428  | 1.17882  | 0.03091 | 480.84230  | 0.59454 |
| 2680 | 4768.92987 | 8.13579  | 9541.00208  | 330.25792  | -1.71406 | 0.00306 | 478.11936  | 0.08277 |
| 2681 | 4057.32475 | 16.37216 | 13214.92682 | 98.92169   | 0.97892  | 0.00219 | 80.04858   | 0.85219 |
| 2682 | 4146.88238 | 16.37306 | 9051.20748  | 596.93429  | -0.96408 | 0.01840 | 663.60839  | 0.46369 |
| 2683 | 3996.81212 | 22.91053 | 7962.95343  | 612.77972  | 2.00856  | 0.03224 | 626.21734  | 0.50967 |
| 2684 | 4965.64604 | 9.95114  | 8483.82426  | 226.28137  | 0.98982  | 0.00434 | 326.09601  | 0.18460 |
| 2685 | 4300.52938 | 15.21319 | 12124.74626 | 476.63990  | -1.38954 | 0.01699 | 583.15826  | 0.32002 |
| 2686 | 3500.92219 | 9.31499  | 7970.76637  | 517.29204  | 1.23140  | 0.03911 | 445.31175  | 0.48149 |
| 2687 | 3903.34687 | 24.72422 | 10045.80923 | 1489.21859 | 5.27938  | 0.01107 | 1375.22749 | 0.35535 |
| 2688 | 4005.96151 | 9.90063  | 9293.72720  | 355.81589  | -2.12773 | 0.00658 | 448.57596  | 0.19377 |
| 2689 | 2569.88712 | 15.51072 | 10838.09954 | 391.19226  | 5.78889  | 0.29476 | 405.99250  | 0.10776 |
| 2690 | 3113.86783 | 19.80110 | 10557.83149 | 603.10561  | 3.64370  | 0.12835 | 445.86513  | 1.13743 |
| 2691 | 3868.89132 | 24.04784 | 12303.78314 | 701.60152  | 5.68764  | 0.01608 | 694.97903  | 0.07324 |
| 2692 | 3776.61106 | 9.54877  | 8263.20164  | 424.57129  | -0.79891 | 0.04449 | 381.54925  | 0.63423 |

|      |            |          |             |           |          |         |           |         |
|------|------------|----------|-------------|-----------|----------|---------|-----------|---------|
| 2693 | 4423.83429 | 15.44462 | 24636.46462 | 85.62307  | -2.28080 | 0.00027 | 61.08027  | 0.37244 |
| 2694 | 2590.19031 | 26.30347 | 11543.84546 | 666.09362 | 7.76498  | 0.17370 | 439.28301 | 1.34740 |
| 2695 | 4680.40598 | 24.51446 | 8695.58177  | 467.12087 | 4.89379  | 0.06234 | 537.42498 | 0.96927 |
| 2696 | 4884.90441 | 9.34023  | 9168.67933  | 81.10975  | 0.17673  | 0.00384 | 49.91937  | 0.65411 |
| 2697 | 4545.28281 | 15.99975 | 11308.41679 | 417.17731 | 4.29173  | 0.06665 | 584.84736 | 0.35936 |
| 2698 | 3539.77962 | 9.37384  | 7465.21593  | 667.48813 | 2.80132  | 0.03814 | 617.59372 | 0.67272 |
| 2699 | 4499.75453 | 16.61432 | 8477.11695  | 609.49657 | 1.11689  | 0.04461 | 705.24048 | 0.42319 |
| 2700 | 4968.42450 | 9.99171  | 8429.20370  | 228.47967 | 0.19368  | 0.00461 | 330.42558 | 0.20246 |
| 2701 | 4465.35975 | 20.44024 | 10323.27944 | 655.90489 | 3.65524  | 0.01663 | 838.08503 | 0.30930 |
| 2702 | 2446.83775 | 13.78144 | 3894.00049  | 469.20049 | 6.01323  | 0.26591 | 555.46766 | 0.66674 |
| 2703 | 4846.27387 | 13.58693 | 12135.12338 | 577.97016 | 2.01011  | 0.03490 | 737.57447 | 0.44717 |
| 2704 | 4952.19691 | 10.76788 | 10057.15645 | 128.50048 | 2.11079  | 0.00358 | 153.25287 | 0.23453 |
| 2705 | 4704.12142 | 19.19769 | 9863.18810  | 590.47731 | 1.47742  | 0.04787 | 757.25511 | 0.30956 |
| 2706 | 3379.70919 | 9.63700  | 6906.69042  | 456.63117 | 2.35299  | 0.06133 | 474.78922 | 0.51950 |
| 2707 | 4814.02584 | 22.39331 | 11624.09189 | 763.38681 | 2.84066  | 0.01514 | 994.62210 | 0.24353 |
| 2708 | 4664.37603 | 24.35826 | 8648.04273  | 497.06269 | 5.47461  | 0.06108 | 580.22617 | 0.94745 |
| 2709 | 4138.30691 | 12.85201 | 12558.00961 | 261.22295 | 0.59291  | 0.00905 | 334.88119 | 0.18508 |
| 2710 | 4420.09516 | 16.93049 | 10243.21789 | 518.18763 | 5.78208  | 0.07920 | 686.57891 | 0.60557 |
| 2711 | 4888.46221 | 9.38927  | 12677.71560 | 439.05168 | 2.77407  | 0.01966 | 654.03593 | 0.27015 |
| 2712 | 4290.18788 | 18.10915 | 6909.09448  | 766.65245 | 2.35119  | 0.05925 | 827.91977 | 0.30438 |
| 2713 | 2489.57767 | 15.04259 | 3897.73893  | 453.02133 | 5.27914  | 0.37898 | 547.21363 | 1.00440 |
| 2714 | 2856.58593 | 16.48823 | 13801.89550 | 409.65730 | 4.22764  | 0.23332 | 364.70989 | 0.68955 |
| 2715 | 4422.37565 | 22.66347 | 8633.75874  | 589.08215 | 4.04082  | 0.01533 | 758.01451 | 0.28342 |
| 2716 | 4976.02329 | 10.30873 | 9100.27344  | 233.36514 | 1.40126  | 0.00411 | 338.20617 | 0.16876 |
| 2717 | 4462.01162 | 21.00070 | 9404.25798  | 587.44455 | 2.64911  | 0.04298 | 759.14642 | 0.37590 |
| 2718 | 4340.22231 | 19.41347 | 6386.51122  | 582.09193 | 2.13598  | 0.04547 | 608.62039 | 0.52164 |
| 2719 | 3222.49788 | 19.45941 | 13201.09992 | 376.12238 | 2.60751  | 0.14955 | 284.69576 | 0.88862 |
| 2720 | 3735.20570 | 13.03385 | 13722.60553 | 154.96497 | -0.74272 | 0.00381 | 178.60542 | 0.23689 |
| 2721 | 3129.75478 | 18.08699 | 10227.83781 | 378.95385 | 4.00842  | 0.19263 | 268.21394 | 0.87656 |
| 2722 | 4446.26617 | 20.42182 | 16185.53875 | 710.54067 | 3.29979  | 0.01573 | 874.75743 | 0.23802 |
| 2723 | 3570.04314 | 17.63718 | 7380.15657  | 450.87546 | 0.60618  | 0.08769 | 460.16735 | 0.84220 |
| 2724 | 3378.76387 | 20.34843 | 10159.24200 | 136.85871 | 4.51426  | 0.01094 | 110.87884 | 0.94026 |
| 2725 | 4790.03093 | 10.24013 | 11216.66767 | 549.30691 | 0.04041  | 0.02495 | 703.09426 | 0.41043 |
| 2726 | 4242.23097 | 19.05138 | 7222.71683  | 482.97766 | 4.40899  | 0.05045 | 520.73797 | 0.42630 |
| 2727 | 4674.20826 | 18.89347 | 12410.08109 | 552.85333 | 5.20104  | 0.04057 | 694.88207 | 0.37513 |
| 2728 | 4965.00313 | 8.59768  | 9807.08889  | 161.18141 | -0.58134 | 0.00296 | 201.90415 | 0.13184 |
| 2729 | 4642.44013 | 20.11236 | 8004.96318  | 370.75854 | 4.02159  | 0.04271 | 512.23561 | 0.33726 |
| 2730 | 4892.22455 | 12.75608 | 7333.57913  | 404.38350 | 3.23361  | 0.04026 | 547.03315 | 0.29303 |
| 2731 | 3648.28098 | 22.06583 | 12512.90095 | 95.27648  | 3.69864  | 0.01460 | 45.30926  | 0.71448 |
| 2732 | 3703.39064 | 24.59646 | 6223.88175  | 647.84716 | 3.16110  | 0.04366 | 591.53320 | 0.46655 |
| 2733 | 2956.34052 | 26.32049 | 12652.64201 | 485.04071 | 5.74085  | 0.11518 | 212.01913 | 1.68063 |
| 2734 | 5009.45453 | 10.10237 | 9282.61780  | 358.32221 | 0.96536  | 0.00536 | 533.95958 | 0.14994 |
| 2735 | 3671.98221 | 14.11096 | 10000.29704 | 459.26361 | 1.13231  | 0.06058 | 484.35942 | 0.51482 |
| 2736 | 4951.74688 | 10.75268 | 10154.29106 | 146.07616 | -0.42502 | 0.00308 | 198.55847 | 0.32641 |
| 2737 | 5024.52713 | 18.29354 | 9205.62592  | 414.74410 | 2.47709  | 0.01900 | 604.61745 | 0.17711 |
| 2738 | 3474.09408 | 13.91469 | 7295.87432  | 603.44690 | 1.82880  | 0.06390 | 596.38494 | 0.56499 |
| 2739 | 3488.22700 | 13.78428 | 7415.73452  | 420.05398 | 0.65838  | 0.05083 | 356.95511 | 0.71861 |
| 2740 | 4453.94687 | 19.55813 | 5688.77286  | 552.88761 | 4.04909  | 0.04087 | 614.51486 | 0.39532 |
| 2741 | 3149.45799 | 19.34040 | 8109.67688  | 472.92650 | 2.44577  | 0.15042 | 329.96576 | 1.92665 |
| 2742 | 4662.97727 | 19.52486 | 12318.58385 | 333.07606 | 5.51126  | 0.10828 | 416.43669 | 0.41871 |
| 2743 | 4371.16791 | 20.47968 | 9886.28829  | 556.20890 | 2.18830  | 0.04206 | 638.62883 | 0.43062 |
| 2744 | 3767.09898 | 9.56647  | 8323.40712  | 591.66760 | 1.27386  | 0.06524 | 585.25211 | 0.53300 |
| 2745 | 3576.35549 | 13.40053 | 5161.58254  | 628.65743 | 2.92990  | 0.04070 | 609.46928 | 0.72672 |
| 2746 | 3670.93148 | 14.07633 | 9969.69235  | 443.20085 | 1.42589  | 0.06028 | 398.14432 | 0.67167 |
| 2747 | 4889.94469 | 9.33942  | 10180.27906 | 529.95212 | -0.57413 | 0.02086 | 688.06867 | 0.33981 |
| 2748 | 4501.98760 | 16.65915 | 8863.30683  | 439.76934 | -0.06046 | 0.04036 | 489.28303 | 0.42519 |
| 2749 | 4885.65130 | 9.31727  | 12567.34890 | 414.10411 | 1.27387  | 0.01637 | 611.07440 | 0.25635 |
| 2750 | 4329.62336 | 19.32783 | 6368.96943  | 701.58046 | 2.42542  | 0.06031 | 757.16245 | 0.36552 |
| 2751 | 4198.56890 | 21.04114 | 10546.07856 | 741.41856 | 2.10763  | 0.03142 | 771.71305 | 0.51493 |
| 2752 | 3753.49885 | 12.99689 | 13625.35483 | 179.57292 | -0.36426 | 0.00486 | 174.90717 | 0.27972 |
| 2753 | 5003.08203 | 7.78474  | 14887.73336 | 149.14503 | -0.40192 | 0.00184 | 205.65495 | 0.08876 |
| 2754 | 4338.48594 | 16.09123 | 9330.56820  | 500.07293 | 5.02873  | 0.10440 | 685.61873 | 0.44538 |
| 2755 | 4759.54911 | 18.19240 | 10683.31869 | 563.81959 | 1.62566  | 0.03213 | 729.15034 | 0.38241 |
| 2756 | 3756.30997 | 12.42160 | 6500.89204  | 370.17220 | -1.83493 | 0.01521 | 431.76738 | 0.35661 |
| 2757 | 4663.28966 | 19.55956 | 12856.97679 | 440.87221 | 3.62915  | 0.09564 | 596.88759 | 0.49522 |
| 2758 | 4747.93094 | 14.79150 | 9634.84986  | 395.94400 | 2.97639  | 0.05740 | 547.51210 | 0.58326 |
| 2759 | 4948.79573 | 8.54301  | 9732.32013  | 216.98874 | -0.60297 | 0.00298 | 301.66414 | 0.14447 |
| 2760 | 4687.28301 | 21.35610 | 17788.65714 | 424.65569 | 5.71152  | 0.07592 | 523.45474 | 0.57824 |
| 2761 | 4921.46632 | 19.95349 | 11513.15112 | 395.54406 | 2.83246  | 0.05161 | 536.52091 | 0.40352 |
| 2762 | 4412.72290 | 17.91582 | 7010.43123  | 553.90923 | 2.59297  | 0.03466 | 601.42523 | 0.48102 |
| 2763 | 3858.30685 | 24.40669 | 6382.79240  | 964.98867 | 2.46315  | 0.01832 | 916.96422 | 0.61860 |

|      |            |          |             |           |          |         |            |         |
|------|------------|----------|-------------|-----------|----------|---------|------------|---------|
| 2764 | 4376.86915 | 18.81584 | 8561.07145  | 678.49640 | 2.25305  | 0.04472 | 727.52631  | 0.39816 |
| 2765 | 3415.84864 | 24.09092 | 11287.06046 | 936.95442 | 8.58419  | 0.17389 | 664.27280  | 1.99842 |
| 2766 | 4977.81415 | 7.10197  | 16407.48400 | 173.36130 | -3.26909 | 0.00168 | 244.52490  | 0.14258 |
| 2767 | 4944.76427 | 13.13459 | 9375.95072  | 386.22639 | 2.02481  | 0.01009 | 590.25146  | 0.19275 |
| 2768 | 4504.73441 | 16.73345 | 8467.85348  | 387.17794 | -0.32376 | 0.02919 | 426.83493  | 0.28041 |
| 2769 | 2915.92800 | 20.10484 | 8020.23339  | 570.61854 | 5.43190  | 0.27787 | 467.11033  | 1.01121 |
| 2770 | 3991.48575 | 22.91938 | 7938.17834  | 733.21629 | 2.00935  | 0.03294 | 813.59333  | 0.54677 |
| 2771 | 3833.92844 | 15.81113 | 8643.30741  | 761.42517 | 1.92890  | 0.03230 | 773.35295  | 0.55883 |
| 2772 | 3824.19943 | 25.12121 | 6697.17705  | 71.55494  | 4.18485  | 0.00607 | 27.83624   | 1.47082 |
| 2773 | 4645.10191 | 15.48592 | 10183.45021 | 396.35920 | 3.91560  | 0.09101 | 548.11976  | 0.43070 |
| 2774 | 5013.22723 | 6.83968  | 8882.19209  | 263.83364 | 1.64521  | 0.00132 | 401.40784  | 0.03267 |
| 2775 | 4537.04992 | 15.86719 | 11181.77384 | 400.01716 | 5.11470  | 0.08782 | 568.90155  | 0.33199 |
| 2776 | 4244.68181 | 17.30342 | 7631.09008  | 611.83490 | -0.55540 | 0.02179 | 689.71662  | 0.50009 |
| 2777 | 4780.82953 | 10.44050 | 11863.91332 | 496.10085 | -1.80838 | 0.00811 | 678.65745  | 0.11756 |
| 2778 | 5116.57272 | 10.83039 | 9374.70939  | 75.66564  | -3.00522 | 0.00072 | 69.94567   | 0.75251 |
| 2779 | 3680.65557 | 7.68448  | 5910.78398  | 407.17718 | -0.67983 | 0.02678 | 433.97085  | 0.51950 |
| 2780 | 4972.82802 | 8.58541  | 9519.96974  | 297.34847 | 0.30816  | 0.00329 | 442.48569  | 0.11654 |
| 2781 | 4616.03462 | 7.78266  | 17510.20822 | 138.72695 | -3.62421 | 0.00004 | 189.44470  | 0.09051 |
| 2782 | 4784.43281 | 15.48255 | 7291.88366  | 390.37774 | 3.40918  | 0.01367 | 569.59625  | 0.21766 |
| 2783 | 4332.55548 | 17.12089 | 8143.17914  | 622.39283 | 2.99220  | 0.05218 | 655.50752  | 0.32580 |
| 2784 | 4174.48829 | 18.99094 | 8225.54970  | 841.84373 | 2.54626  | 0.03848 | 874.90830  | 0.49532 |
| 2785 | 4252.88464 | 23.32777 | 12236.66563 | 689.16122 | 5.56795  | 0.01244 | 822.56199  | 0.12788 |
| 2786 | 3539.26812 | 9.40263  | 7354.65270  | 504.78348 | 1.94432  | 0.04368 | 413.52310  | 0.63763 |
| 2787 | 3170.88966 | 15.82069 | 12160.99855 | 379.42963 | 3.79504  | 0.11843 | 252.42912  | 0.58258 |
| 2788 | 3508.51882 | 9.34340  | 8004.50231  | 341.00650 | -0.45652 | 0.03625 | 264.67796  | 0.44514 |
| 2789 | 4210.68613 | 12.44964 | 12453.61455 | 192.67482 | -2.02299 | 0.00358 | 221.07635  | 0.27531 |
| 2790 | 4678.28928 | 21.50244 | 9183.03239  | 548.51378 | 3.33977  | 0.05515 | 672.21871  | 0.53127 |
| 2791 | 4011.15354 | 9.35749  | 9028.93551  | 258.35908 | -2.95242 | 0.00674 | 285.52395  | 0.24564 |
| 2792 | 4144.01945 | 19.67018 | 15219.38348 | 92.06512  | 3.13172  | 0.01294 | 53.31872   | 0.73924 |
| 2793 | 4976.24627 | 16.46551 | 9553.93020  | 290.50668 | 2.23904  | 0.03882 | 352.51873  | 0.49822 |
| 2794 | 2556.93097 | 15.74027 | 11662.63555 | 458.46861 | 5.48569  | 0.24236 | 392.93513  | 0.51866 |
| 2795 | 4852.31588 | 13.68533 | 11890.10859 | 335.80712 | 2.26014  | 0.04363 | 401.55374  | 0.49122 |
| 2796 | 3831.21155 | 23.92784 | 7087.95580  | 559.96606 | 6.50410  | 0.06497 | 578.24275  | 0.42639 |
| 2797 | 4473.79333 | 20.44823 | 13800.93633 | 544.84369 | 5.44591  | 0.10924 | 695.27574  | 0.44467 |
| 2798 | 4978.14194 | 17.60450 | 8067.03574  | 722.22072 | 0.56706  | 0.01991 | 949.84944  | 0.31045 |
| 2799 | 5078.36618 | 9.63749  | 14133.54746 | 137.25458 | -1.29326 | 0.00251 | 174.79391  | 0.35023 |
| 2800 | 4790.59203 | 10.24800 | 11163.42027 | 399.59967 | -0.51722 | 0.02613 | 501.11495  | 0.41697 |
| 2801 | 4334.11822 | 17.21144 | 8157.65976  | 498.84458 | 2.93149  | 0.04313 | 504.57844  | 0.41660 |
| 2802 | 4420.52955 | 22.67645 | 8536.36988  | 560.52812 | 3.61580  | 0.01432 | 769.26492  | 0.28974 |
| 2803 | 4899.83237 | 13.47544 | 8997.79296  | 446.51349 | 2.73022  | 0.01575 | 650.11726  | 0.23916 |
| 2804 | 4709.04223 | 19.22943 | 11505.19691 | 380.83459 | 4.45501  | 0.08210 | 498.66276  | 0.56646 |
| 2805 | 4629.54945 | 22.28138 | 9850.47317  | 674.54306 | 2.26757  | 0.03870 | 847.82708  | 0.42247 |
| 2806 | 5020.68225 | 13.82061 | 8449.56263  | 442.44395 | 1.55951  | 0.01675 | 653.32597  | 0.21058 |
| 2807 | 4193.99231 | 23.84300 | 8436.17540  | 614.61481 | 1.89993  | 0.05363 | 649.14379  | 0.55984 |
| 2808 | 4458.20665 | 19.59915 | 5661.27670  | 519.00604 | 3.84296  | 0.03129 | 575.32411  | 0.45753 |
| 2809 | 4921.14723 | 19.95372 | 11498.61871 | 470.61268 | 2.09717  | 0.05211 | 641.41293  | 0.39070 |
| 2810 | 3696.17397 | 24.56908 | 6227.81604  | 614.21100 | 2.58668  | 0.04008 | 609.10895  | 0.46990 |
| 2811 | 4290.67726 | 17.66654 | 7526.77261  | 788.30000 | 3.44027  | 0.04842 | 824.97334  | 0.42527 |
| 2812 | 2961.99217 | 24.81767 | 7227.43905  | 547.39572 | 5.86086  | 0.15319 | 362.91801  | 0.99777 |
| 2813 | 2554.52418 | 15.31521 | 4094.51782  | 477.43393 | 5.63307  | 0.24484 | 403.53594  | 0.65604 |
| 2814 | 3801.62527 | 13.07087 | 12118.21907 | 147.10702 | -1.70147 | 0.00526 | 140.10581  | 0.77160 |
| 2815 | 3219.67695 | 14.51426 | 10054.78796 | 393.61553 | 2.92535  | 0.09547 | 436.71515  | 0.35480 |
| 2816 | 4795.51194 | 10.39035 | 11116.25144 | 430.59087 | 1.75391  | 0.03186 | 527.34749  | 0.42638 |
| 2817 | 5095.94658 | 13.00493 | 12611.05845 | 63.51435  | -1.86110 | 0.00070 | 41.27400   | 0.41561 |
| 2818 | 4664.81914 | 19.55855 | 11924.88434 | 483.28874 | 3.73197  | 0.09249 | 649.27208  | 0.49838 |
| 2819 | 4255.19390 | 18.97581 | 7157.39073  | 842.65705 | 2.78858  | 0.03727 | 904.64983  | 0.46156 |
| 2820 | 4337.24431 | 23.79005 | 10413.91052 | 927.60972 | 3.21678  | 0.02920 | 1001.46929 | 0.55886 |
| 2821 | 4335.05391 | 18.26287 | 6882.65584  | 486.69435 | 3.83270  | 0.03532 | 496.06755  | 0.51527 |
| 2822 | 3380.53052 | 9.62890  | 6931.43386  | 365.63595 | 2.55084  | 0.05882 | 359.15267  | 0.51502 |
| 2823 | 4078.92611 | 21.87262 | 8905.79768  | 786.27674 | 2.09572  | 0.02623 | 807.39176  | 0.49543 |
| 2824 | 3186.09722 | 16.53133 | 7062.33210  | 438.98105 | 2.51267  | 0.12149 | 403.28143  | 0.72222 |
| 2825 | 4640.17837 | 15.42554 | 8184.74166  | 422.29343 | 5.62782  | 0.10386 | 588.35833  | 0.46470 |
| 2826 | 3800.88520 | 20.35089 | 11399.10458 | 469.51048 | -2.00407 | 0.08613 | 485.71881  | 0.87228 |
| 2827 | 4246.58744 | 19.09171 | 7254.35818  | 568.68610 | 3.87937  | 0.04783 | 605.60223  | 0.47231 |
| 2828 | 3137.12296 | 16.79605 | 9538.35760  | 474.07438 | 2.54044  | 0.18699 | 390.07657  | 0.66056 |
| 2829 | 3221.12745 | 14.50946 | 10068.45127 | 246.15001 | 2.49082  | 0.09358 | 238.83850  | 0.38691 |
| 2830 | 3524.56015 | 16.73400 | 16950.57981 | 378.78956 | 1.77859  | 0.15558 | 325.19604  | 0.76866 |
| 2831 | 4330.81993 | 18.33687 | 6853.60367  | 579.27464 | 3.01099  | 0.03101 | 640.73974  | 0.51641 |
| 2832 | 3217.49017 | 14.55057 | 10018.06057 | 364.96468 | 3.30011  | 0.09749 | 364.09426  | 0.41281 |
| 2833 | 4972.92959 | 8.58266  | 9206.66982  | 283.62469 | -0.16465 | 0.00353 | 421.40879  | 0.10242 |
| 2834 | 4424.97200 | 17.39325 | 10699.54601 | 548.28170 | 1.84338  | 0.02799 | 587.93850  | 0.40337 |

|      |            |          |             |            |          |         |           |         |
|------|------------|----------|-------------|------------|----------|---------|-----------|---------|
| 2835 | 3740.31450 | 11.69756 | 7551.64942  | 860.09756  | 3.25901  | 0.02689 | 828.75254 | 0.67789 |
| 2836 | 3734.43214 | 13.06754 | 13705.86339 | 139.54970  | -0.36634 | 0.00373 | 133.37809 | 0.28053 |
| 2837 | 3536.28801 | 17.41315 | 7989.09930  | 429.55753  | 0.49298  | 0.05807 | 432.37932 | 0.58244 |
| 2838 | 4508.18454 | 22.53899 | 7787.29405  | 384.73501  | 6.19224  | 0.14224 | 390.18547 | 0.75897 |
| 2839 | 3832.53461 | 15.81005 | 8607.91221  | 797.50996  | 2.82338  | 0.03742 | 785.84856 | 0.54495 |
| 2840 | 4708.81213 | 11.13926 | 15957.62605 | 152.61683  | 1.24995  | 0.00502 | 206.33016 | 0.26116 |
| 2841 | 4430.19962 | 14.78895 | 6254.81617  | 696.40617  | 2.65084  | 0.02377 | 781.66328 | 0.35292 |
| 2842 | 4117.78648 | 19.59303 | 15020.61758 | 98.04091   | 2.17412  | 0.01107 | 52.69645  | 0.67116 |
| 2843 | 4281.49774 | 14.23614 | 6826.12413  | 603.18670  | -0.16361 | 0.02506 | 698.19670 | 0.42163 |
| 2844 | 3536.61850 | 17.39312 | 7960.19906  | 407.94646  | -0.41339 | 0.05144 | 388.81605 | 0.58685 |
| 2845 | 4748.54287 | 8.56110  | 9960.51886  | 272.69951  | -4.47747 | 0.00338 | 368.24672 | 0.11681 |
| 2846 | 4240.66488 | 17.41477 | 7582.10455  | 635.85009  | 0.86224  | 0.02492 | 720.51703 | 0.43914 |
| 2847 | 2951.98744 | 16.90356 | 15139.19643 | 373.23666  | 3.46178  | 0.23885 | 316.10458 | 0.72242 |
| 2848 | 4182.35042 | 11.25578 | 15094.78979 | 135.41473  | -3.40735 | 0.00210 | 152.48481 | 1.17268 |
| 2849 | 3766.89764 | 11.91383 | 9283.75467  | 612.90884  | 1.59008  | 0.02901 | 587.43814 | 0.65609 |
| 2850 | 4200.22321 | 23.83664 | 8453.04043  | 750.34293  | 1.85492  | 0.04920 | 821.82022 | 0.56149 |
| 2851 | 4759.16165 | 18.18506 | 10681.65282 | 665.25193  | 1.05068  | 0.03107 | 853.05078 | 0.40090 |
| 2852 | 4707.99667 | 15.77057 | 11408.95145 | 452.26649  | 3.56994  | 0.05173 | 593.36837 | 0.39662 |
| 2853 | 4966.03337 | 10.88237 | 10172.33643 | 110.49494  | 0.31189  | 0.00304 | 129.44625 | 0.28753 |
| 2854 | 3308.27548 | 14.82911 | 11743.85292 | 379.45680  | 1.94535  | 0.05685 | 364.97254 | 0.64534 |
| 2855 | 4628.75589 | 22.28121 | 9793.93616  | 673.79223  | 1.68272  | 0.03763 | 846.46929 | 0.38069 |
| 2856 | 4078.84130 | 21.83128 | 8922.85536  | 662.33140  | 2.37590  | 0.02933 | 652.05089 | 0.49687 |
| 2857 | 3715.10998 | 24.54369 | 6213.35324  | 512.30730  | 2.34134  | 0.03784 | 411.26872 | 0.45542 |
| 2858 | 4247.68350 | 19.10851 | 7269.31273  | 632.95828  | 3.96420  | 0.04716 | 695.13500 | 0.50600 |
| 2859 | 3215.78368 | 14.54675 | 9993.84267  | 422.09194  | 2.55581  | 0.09315 | 446.13780 | 0.45295 |
| 2860 | 4737.54347 | 15.91257 | 12184.30076 | 322.74715  | 3.51355  | 0.04491 | 434.13618 | 0.42739 |
| 2861 | 4918.14579 | 10.74099 | 8905.73093  | 176.22027  | 1.50496  | 0.00540 | 251.67169 | 0.13391 |
| 2862 | 3475.77426 | 13.92675 | 7313.64612  | 547.64845  | 1.76564  | 0.06343 | 494.92262 | 0.60627 |
| 2863 | 4366.32040 | 18.85936 | 9571.78508  | 429.12168  | 4.12316  | 0.04821 | 434.04658 | 0.40086 |
| 2864 | 4506.51778 | 16.69920 | 8856.37011  | 585.72315  | 0.05904  | 0.03132 | 693.75773 | 0.34424 |
| 2865 | 3539.32484 | 17.43448 | 8015.21422  | 416.94106  | 0.51397  | 0.05715 | 449.39231 | 0.58330 |
| 2866 | 4574.63864 | 7.67257  | 8847.19453  | 320.78414  | -1.47800 | 0.00423 | 456.18632 | 0.08483 |
| 2867 | 3508.08537 | 9.32252  | 8045.50175  | 423.61645  | 0.55757  | 0.03842 | 396.65785 | 0.46821 |
| 2868 | 4893.66649 | 9.52336  | 12781.76067 | 395.33915  | 4.81440  | 0.02190 | 587.93690 | 0.22977 |
| 2869 | 4774.40762 | 10.20669 | 11720.73714 | 409.12521  | -3.41381 | 0.00794 | 553.07625 | 0.11814 |
| 2870 | 2574.19136 | 15.16537 | 10954.63030 | 463.88441  | 5.48574  | 0.25495 | 485.45593 | 0.91102 |
| 2871 | 4688.12081 | 21.36133 | 17492.95994 | 498.08969  | 5.21658  | 0.06853 | 623.83454 | 0.60003 |
| 2872 | 3740.58353 | 11.70966 | 7552.60549  | 686.58387  | 3.12393  | 0.02642 | 641.06257 | 0.51695 |
| 2873 | 4450.35565 | 20.36519 | 11010.14945 | 662.47126  | 4.33940  | 0.01677 | 781.84958 | 0.26986 |
| 2874 | 4822.25924 | 20.82466 | 7834.31579  | 609.58090  | 3.94765  | 0.06432 | 741.56700 | 0.38439 |
| 2875 | 4575.12746 | 10.35060 | 9301.93161  | 539.38021  | -2.00048 | 0.02632 | 699.23706 | 0.24735 |
| 2876 | 3137.10946 | 15.60843 | 6715.16073  | 300.33444  | 1.00383  | 0.01694 | 281.87883 | 0.19902 |
| 2877 | 4421.29142 | 22.67585 | 8538.48300  | 729.48230  | 3.94045  | 0.01342 | 953.11382 | 0.28709 |
| 2878 | 4704.34669 | 19.19264 | 9862.56356  | 601.77846  | 1.44918  | 0.04213 | 774.09154 | 0.28672 |
| 2879 | 3786.41036 | 24.15631 | 11031.85366 | 764.79496  | 2.82160  | 0.03932 | 748.68193 | 0.80053 |
| 2880 | 3735.98935 | 11.58781 | 8734.86061  | 626.68971  | 0.67018  | 0.02713 | 631.08033 | 0.64378 |
| 2881 | 4845.00780 | 12.66599 | 16794.70704 | 338.70891  | 3.50321  | 0.02259 | 473.53479 | 0.25560 |
| 2882 | 2442.97075 | 13.62156 | 3719.84179  | 479.36382  | 6.32516  | 0.23542 | 561.54369 | 0.29554 |
| 2883 | 4552.09105 | 17.76341 | 8423.79946  | 435.93397  | 1.95081  | 0.02609 | 567.80918 | 0.30606 |
| 2884 | 3715.66831 | 24.60371 | 6223.49708  | 536.31970  | 3.51144  | 0.04898 | 460.87163 | 0.47098 |
| 2885 | 4461.55206 | 19.60745 | 5661.41399  | 604.41884  | 3.25562  | 0.03066 | 715.36680 | 0.46120 |
| 2886 | 4606.25401 | 18.87771 | 8416.87265  | 451.58326  | 5.48630  | 0.03007 | 593.50227 | 0.31233 |
| 2887 | 4007.67631 | 9.30630  | 8900.26216  | 278.31369  | -2.64288 | 0.00634 | 321.40028 | 0.22562 |
| 2888 | 4199.95652 | 11.99564 | 12006.14924 | 106.50281  | -1.89974 | 0.00153 | 97.74338  | 0.73515 |
| 2889 | 4463.46058 | 20.99714 | 9417.36576  | 560.65011  | 1.96695  | 0.04522 | 727.59105 | 0.36263 |
| 2890 | 4454.06727 | 21.75541 | 7636.95420  | 411.39767  | 3.51538  | 0.03162 | 525.69914 | 0.27278 |
| 2891 | 4343.94754 | 18.76065 | 7836.60418  | 370.91831  | 6.97245  | 0.11142 | 414.22333 | 0.49561 |
| 2892 | 4958.10338 | 6.63778  | 10777.34615 | 355.61290  | -3.06128 | 0.00577 | 499.11067 | 0.16275 |
| 2893 | 4425.39807 | 17.36053 | 10703.04834 | 641.52175  | 1.51122  | 0.02963 | 720.52358 | 0.36718 |
| 2894 | 2475.67813 | 13.53371 | 4272.43290  | 452.69570  | 5.93490  | 0.11671 | 358.58644 | 0.89635 |
| 2895 | 4281.60491 | 14.22596 | 6841.98225  | 511.42022  | -1.07647 | 0.02909 | 572.30551 | 0.32701 |
| 2896 | 4875.67844 | 7.72458  | 9865.24518  | 400.61043  | 0.44488  | 0.01110 | 560.36540 | 0.19907 |
| 2897 | 3410.28872 | 24.20603 | 11229.64764 | 1373.28780 | 8.40313  | 0.14242 | 995.24140 | 1.95639 |
| 2898 | 4340.32678 | 19.41237 | 6387.08070  | 743.84348  | 1.89091  | 0.04740 | 805.04069 | 0.48433 |
| 2899 | 4281.35909 | 14.22760 | 6844.33948  | 569.92602  | 0.72607  | 0.02941 | 666.42579 | 0.34876 |
| 2900 | 4573.54340 | 20.71706 | 16970.11531 | 539.49664  | 5.55448  | 0.09515 | 679.22590 | 0.49166 |
| 2901 | 4426.83015 | 17.35843 | 10718.00572 | 721.49990  | 2.30202  | 0.03456 | 806.89898 | 0.36316 |
| 2902 | 4515.83868 | 20.83437 | 11713.48701 | 538.45243  | 4.40727  | 0.01790 | 662.29623 | 0.32137 |
| 2903 | 4823.31817 | 20.83950 | 7785.27318  | 469.92236  | 4.59813  | 0.04374 | 587.53674 | 0.44843 |
| 2904 | 3845.07569 | 20.22507 | 6355.57044  | 720.60165  | 2.29188  | 0.02594 | 720.42970 | 0.51146 |
| 2905 | 4041.62092 | 12.71079 | 15253.19844 | 89.36940   | -2.81157 | 0.00307 | 70.74135  | 1.35380 |

|      |            |          |             |           |          |         |           |         |
|------|------------|----------|-------------|-----------|----------|---------|-----------|---------|
| 2906 | 3504.90667 | 9.32541  | 8013.24719  | 409.00579 | 0.25136  | 0.03704 | 358.32183 | 0.47755 |
| 2907 | 4573.75660 | 7.65108  | 8602.37373  | 333.84703 | -0.03781 | 0.00561 | 457.74263 | 0.11832 |
| 2908 | 4083.67676 | 18.97692 | 6694.13479  | 732.14043 | 3.34347  | 0.07161 | 728.56725 | 0.60800 |
| 2909 | 5106.81892 | 10.78744 | 9074.80441  | 78.39093  | -4.03311 | 0.00083 | 75.64140  | 0.73924 |
| 2910 | 4658.79176 | 19.54648 | 12703.78009 | 392.46916 | 4.67672  | 0.09465 | 514.92329 | 0.48794 |
| 2911 | 4489.84028 | 21.07309 | 9250.54746  | 605.96302 | 2.40123  | 0.04340 | 793.93893 | 0.39946 |
| 2912 | 4899.18631 | 13.49202 | 8173.37825  | 442.65537 | 1.99330  | 0.01645 | 640.51466 | 0.21737 |
| 2913 | 4850.93049 | 15.83179 | 8875.46552  | 475.77406 | 3.94094  | 0.02844 | 699.26596 | 0.25759 |
| 2914 | 4768.82193 | 8.13551  | 9543.62502  | 368.30115 | -3.30210 | 0.00285 | 532.54734 | 0.06372 |
| 2915 | 4957.54687 | 6.63565  | 10632.45491 | 372.75312 | -3.50510 | 0.00614 | 523.48781 | 0.18703 |
| 2916 | 4576.19264 | 10.23039 | 9304.34501  | 450.56292 | -2.74417 | 0.01834 | 570.93778 | 0.19647 |
| 2917 | 4941.41851 | 13.05325 | 9348.61246  | 456.69959 | 2.60523  | 0.00951 | 676.26275 | 0.18436 |
| 2918 | 4909.16215 | 13.60664 | 8014.53546  | 459.45250 | 4.00882  | 0.01852 | 680.27398 | 0.19580 |
| 2919 | 4761.24793 | 14.81302 | 10480.92388 | 407.89839 | 3.00268  | 0.02325 | 594.13690 | 0.33386 |
| 2920 | 4513.99801 | 19.82082 | 7361.21928  | 603.52762 | 1.68639  | 0.04603 | 733.47726 | 0.45373 |
| 2921 | 4178.89446 | 18.97135 | 8265.00519  | 711.33807 | 1.33092  | 0.03269 | 781.40320 | 0.51845 |
| 2922 | 4723.77269 | 19.33101 | 9907.66733  | 496.01062 | 1.31918  | 0.03848 | 643.72141 | 0.27914 |
| 2923 | 4450.46921 | 20.10561 | 13471.58852 | 531.35338 | 5.31701  | 0.10451 | 632.67515 | 0.34086 |
| 2924 | 5023.05277 | 18.24628 | 10080.22668 | 422.86414 | 2.28907  | 0.01756 | 614.90287 | 0.25435 |
| 2925 | 4400.86925 | 15.26450 | 24650.68442 | 86.87761  | -2.32355 | 0.00033 | 72.47279  | 0.23437 |
| 2926 | 4752.10634 | 14.66956 | 9483.41995  | 432.35993 | 3.87403  | 0.02291 | 626.90881 | 0.33433 |
| 2927 | 4757.82204 | 21.58542 | 19571.10353 | 475.69506 | 4.81577  | 0.03670 | 606.99464 | 0.33019 |
| 2928 | 2899.82646 | 19.95993 | 7942.43234  | 463.32199 | 5.01419  | 0.27342 | 304.27942 | 1.09435 |
| 2929 | 3869.55023 | 24.39345 | 6315.25570  | 908.86856 | 4.95608  | 0.01711 | 896.64339 | 0.68456 |
| 2930 | 4418.26025 | 22.71090 | 8502.54685  | 640.87097 | 3.26918  | 0.01377 | 849.13317 | 0.24242 |
| 2931 | 4765.95437 | 18.39119 | 10592.39522 | 654.27296 | 1.59809  | 0.04639 | 827.41672 | 0.31857 |
| 2932 | 4487.05626 | 22.90282 | 7713.55228  | 395.43158 | 6.78231  | 0.13696 | 451.54042 | 0.68064 |
| 2933 | 4567.40228 | 22.50790 | 12909.75870 | 500.34680 | 5.29683  | 0.02733 | 623.42178 | 0.36068 |
| 2934 | 4779.21591 | 10.38841 | 11641.17870 | 522.29511 | -1.13017 | 0.01026 | 694.82735 | 0.14044 |
| 2935 | 4230.18644 | 18.85662 | 6821.99831  | 736.40262 | 3.26349  | 0.04593 | 781.73252 | 0.55321 |
| 2936 | 4803.80053 | 22.28225 | 11471.64419 | 475.75197 | 1.83250  | 0.01400 | 624.53980 | 0.28340 |
| 2937 | 4230.49658 | 18.87457 | 6832.24101  | 593.28411 | 2.52613  | 0.04334 | 607.78803 | 0.53936 |
| 2938 | 4333.67799 | 17.24201 | 8153.85406  | 643.33497 | 2.16790  | 0.04163 | 705.74213 | 0.37038 |
| 2939 | 2572.50832 | 15.75672 | 11189.42899 | 464.17637 | 5.31630  | 0.28539 | 497.94726 | 0.18914 |
| 2940 | 4430.59100 | 14.69009 | 6175.13452  | 640.41140 | 3.04742  | 0.02451 | 700.26681 | 0.33000 |
| 2941 | 3923.74277 | 18.57529 | 7276.84972  | 667.88068 | 5.62119  | 0.05351 | 553.12730 | 0.63549 |
| 2942 | 4927.72630 | 7.60915  | 9213.97351  | 354.86602 | -3.70305 | 0.00034 | 533.09884 | 0.03280 |
| 2943 | 4767.23848 | 18.34494 | 10671.11156 | 530.94620 | 1.56703  | 0.03760 | 690.52357 | 0.37444 |
| 2944 | 4845.35201 | 12.73128 | 12983.62718 | 455.91360 | 2.94793  | 0.02509 | 647.49084 | 0.32968 |
| 2945 | 5009.83391 | 10.11016 | 8312.65839  | 329.46505 | 1.72840  | 0.00615 | 493.21842 | 0.12409 |
| 2946 | 3216.75096 | 16.53102 | 12184.45405 | 365.30770 | 2.00062  | 0.08275 | 296.98375 | 0.78561 |
| 2947 | 4745.64350 | 21.53150 | 19963.57079 | 397.96682 | 3.16936  | 0.03481 | 497.81671 | 0.36702 |
| 2948 | 3841.67442 | 20.21894 | 6350.56744  | 732.02556 | 2.03376  | 0.02300 | 755.24139 | 0.52155 |
| 2949 | 4962.87937 | 8.31760  | 9942.68807  | 213.22494 | -1.34948 | 0.00610 | 294.67293 | 0.17285 |
| 2950 | 4820.80881 | 20.94747 | 7790.21485  | 569.54555 | 3.53094  | 0.04309 | 702.35975 | 0.40755 |
| 2951 | 4759.02181 | 21.63347 | 19573.28748 | 683.77891 | 2.84627  | 0.03622 | 882.27678 | 0.33640 |
| 2952 | 3870.83141 | 24.05563 | 12319.67415 | 610.19698 | 5.25940  | 0.01654 | 585.11779 | 0.07734 |
| 2953 | 4647.25353 | 22.35331 | 9737.77528  | 543.53076 | 2.67624  | 0.03481 | 696.18997 | 0.48388 |
| 2954 | 4197.39886 | 21.01010 | 10530.36790 | 665.36460 | 2.14702  | 0.03478 | 686.38452 | 0.51906 |
| 2955 | 4416.00340 | 22.76350 | 8394.08100  | 570.03754 | 3.07783  | 0.01420 | 742.89049 | 0.32757 |
| 2956 | 4281.53948 | 14.16689 | 6881.37152  | 539.53073 | -2.61951 | 0.01995 | 621.17565 | 0.47229 |
| 2957 | 4567.51019 | 20.65843 | 17842.67599 | 373.86196 | 5.98914  | 0.08145 | 467.82487 | 0.43996 |
| 2958 | 2793.71303 | 14.51505 | 13715.58346 | 526.10070 | 4.69758  | 0.25516 | 452.99799 | 0.58601 |
| 2959 | 3720.81099 | 24.20815 | 10661.51421 | 911.57783 | 4.33549  | 0.05655 | 835.06133 | 0.64897 |
| 2960 | 4244.30216 | 17.32189 | 7623.33752  | 703.97500 | 0.19952  | 0.02074 | 793.15941 | 0.53527 |
| 2961 | 3294.64238 | 17.29762 | 7433.77867  | 395.79343 | 0.18790  | 0.08458 | 327.69681 | 0.77515 |
| 2962 | 4993.45195 | 7.06779  | 9295.54429  | 261.12173 | -5.17544 | 0.00027 | 373.37244 | 0.03371 |
| 2963 | 4573.16767 | 22.49988 | 12938.35042 | 524.08133 | 4.99504  | 0.03120 | 653.03012 | 0.35016 |
| 2964 | 4550.03320 | 16.06198 | 11290.32174 | 395.50095 | 4.76666  | 0.07208 | 559.45379 | 0.37644 |
| 2965 | 4418.56373 | 17.89361 | 7185.17950  | 574.41302 | 1.68599  | 0.04060 | 664.67031 | 0.40753 |
| 2966 | 3735.65303 | 24.18695 | 10715.59798 | 757.49987 | 4.30306  | 0.05449 | 726.53241 | 0.74327 |
| 2967 | 3857.14170 | 24.39127 | 6301.65262  | 942.74591 | 2.92274  | 0.01719 | 844.63290 | 0.81436 |
| 2968 | 3906.32610 | 11.36975 | 14422.05248 | 190.50118 | -1.00362 | 0.00352 | 233.26464 | 0.48701 |
| 2969 | 4397.97359 | 6.50649  | 7827.70862  | 408.65746 | 0.12390  | 0.00420 | 530.49030 | 0.06853 |
| 2970 | 3361.55992 | 19.13100 | 18927.18740 | 423.88446 | 1.81331  | 0.10803 | 356.62474 | 1.06391 |
| 2971 | 5023.16010 | 13.88367 | 8345.58341  | 388.00972 | 4.51459  | 0.01822 | 571.73268 | 0.16605 |
| 2972 | 3781.96825 | 24.19864 | 11013.63220 | 511.05617 | 2.88475  | 0.03930 | 424.78389 | 0.74650 |
| 2973 | 3766.08611 | 11.89697 | 9273.64025  | 693.21199 | 1.37549  | 0.03006 | 720.68145 | 0.49174 |
| 2974 | 3910.26053 | 12.93215 | 12022.30871 | 416.01579 | 1.04417  | 0.03847 | 433.90768 | 0.43579 |
| 2975 | 3866.57595 | 19.57760 | 13672.60574 | 114.16934 | 1.34075  | 0.01415 | 91.41759  | 1.27519 |
| 2976 | 3214.55417 | 19.20807 | 13241.38390 | 511.92663 | 2.76839  | 0.19990 | 432.39702 | 0.72175 |

|      |            |          |             |           |          |         |            |         |
|------|------------|----------|-------------|-----------|----------|---------|------------|---------|
| 2977 | 3187.35352 | 16.57883 | 7020.92136  | 339.87469 | 2.78121  | 0.12192 | 219.06628  | 0.73317 |
| 2978 | 4465.87232 | 20.38149 | 13661.18626 | 470.93612 | 5.89928  | 0.10947 | 575.35794  | 0.38471 |
| 2979 | 4786.15972 | 22.27225 | 10656.50831 | 591.49396 | 4.14954  | 0.05589 | 749.38849  | 0.50176 |
| 2980 | 3763.77215 | 19.01239 | 12344.13796 | 409.12387 | -1.33669 | 0.07367 | 360.77274  | 0.93856 |
| 2981 | 2449.44531 | 13.75515 | 3932.17305  | 525.19043 | 5.96446  | 0.26960 | 602.72934  | 0.49968 |
| 2982 | 4411.88847 | 17.94012 | 7021.16626  | 523.27844 | 2.18934  | 0.02903 | 538.78023  | 0.47983 |
| 2983 | 4957.73092 | 6.62684  | 10219.02646 | 348.41976 | -1.31453 | 0.00618 | 505.72685  | 0.21149 |
| 2984 | 5022.85899 | 18.24162 | 9227.57426  | 419.66786 | 2.19139  | 0.01737 | 602.54466  | 0.24848 |
| 2985 | 3767.10586 | 9.57134  | 8359.79303  | 411.88401 | 0.05912  | 0.05347 | 392.60921  | 0.58694 |
| 2986 | 3630.13925 | 23.25443 | 5143.24811  | 695.23054 | 7.35684  | 0.07284 | 692.96645  | 0.51578 |
| 2987 | 5076.05381 | 13.21340 | 9879.09349  | 107.28096 | 0.07031  | 0.00133 | 128.46683  | 0.31629 |
| 2988 | 5264.05882 | 4.53103  | 4525.51318  | 29.84379  | -3.51337 | 0.00003 | 0.04781    | 1.17705 |
| 2989 | 4486.10945 | 21.01017 | 9245.28760  | 528.29616 | 2.79485  | 0.04300 | 702.00855  | 0.39365 |
| 2990 | 4663.24973 | 19.56534 | 12852.77691 | 255.98573 | 5.50376  | 0.09478 | 308.29921  | 0.49517 |
| 2991 | 4239.84295 | 17.40388 | 7573.28751  | 716.80600 | 0.69973  | 0.02461 | 798.32993  | 0.48150 |
| 2992 | 4700.83401 | 18.26321 | 16670.55148 | 314.89007 | 4.52193  | 0.02965 | 395.91640  | 0.17602 |
| 2993 | 3173.38037 | 18.32885 | 10539.80696 | 309.11012 | 3.23356  | 0.17319 | 251.25977  | 0.74545 |
| 2994 | 4573.29712 | 7.61556  | 8647.65081  | 239.76379 | -2.38834 | 0.00504 | 310.10327  | 0.14092 |
| 2995 | 3129.07433 | 18.10017 | 10195.77902 | 451.30045 | 4.27559  | 0.19131 | 417.91686  | 0.66991 |
| 2996 | 4676.26411 | 7.47411  | 19889.55212 | 88.56916  | -5.18297 | 0.00002 | 87.69512   | 0.32256 |
| 2997 | 4433.14989 | 15.55488 | 6484.38973  | 624.62029 | 2.09877  | 0.02460 | 704.76004  | 0.35878 |
| 2998 | 3767.05769 | 9.55411  | 8327.04195  | 504.27308 | 1.81642  | 0.06773 | 477.72354  | 0.64136 |
| 2999 | 4612.06781 | 22.34789 | 8675.13458  | 706.30850 | 1.37978  | 0.04661 | 887.26259  | 0.43165 |
| 3000 | 3393.64575 | 9.57956  | 6806.04027  | 342.12511 | 0.67009  | 0.04948 | 318.60509  | 0.57156 |
| 3001 | 4604.73920 | 18.84458 | 7948.56460  | 459.49888 | 3.98399  | 0.03199 | 617.94857  | 0.28097 |
| 3002 | 4605.22280 | 22.18803 | 10974.91442 | 345.06886 | 4.87826  | 0.06657 | 378.04352  | 0.57040 |
| 3003 | 4783.30476 | 16.53533 | 9814.44063  | 620.11754 | 0.99888  | 0.03098 | 806.21381  | 0.34238 |
| 3004 | 3583.08005 | 13.22469 | 5363.92207  | 499.22075 | 0.77403  | 0.04244 | 454.53322  | 0.57577 |
| 3005 | 4485.25816 | 15.11557 | 23595.45700 | 78.84346  | -3.01540 | 0.00023 | 56.29585   | 0.47606 |
| 3006 | 4669.89828 | 20.16318 | 8191.71083  | 285.08122 | 4.60897  | 0.04820 | 382.65637  | 0.29857 |
| 3007 | 4608.18549 | 18.91649 | 8434.90024  | 371.91932 | 4.95388  | 0.03833 | 476.50314  | 0.32137 |
| 3008 | 4844.46003 | 12.70198 | 16847.32467 | 441.30735 | 2.55709  | 0.02527 | 628.89690  | 0.24243 |
| 3009 | 4542.89621 | 15.90824 | 11159.39022 | 391.90103 | 6.44182  | 0.08814 | 548.50744  | 0.30710 |
| 3010 | 4835.64285 | 14.47146 | 11297.92380 | 370.49770 | 3.17482  | 0.03074 | 560.00386  | 0.23821 |
| 3011 | 4373.52419 | 20.45334 | 9931.97225  | 545.52253 | 1.82690  | 0.04246 | 634.19218  | 0.48453 |
| 3012 | 4256.37348 | 23.26498 | 13481.36445 | 895.87537 | 3.53555  | 0.00910 | 1061.67730 | 0.13391 |
| 3013 | 4975.03143 | 10.27448 | 8739.04211  | 240.34018 | 1.35525  | 0.00435 | 343.27847  | 0.13756 |
| 3014 | 4551.51833 | 17.77682 | 8422.81179  | 474.75904 | 0.81973  | 0.02785 | 621.76007  | 0.30476 |
| 3015 | 4402.89649 | 22.64752 | 8501.59971  | 544.97682 | 4.33823  | 0.01835 | 732.00089  | 0.27454 |
| 3016 | 4242.18291 | 19.23023 | 7235.26115  | 590.50771 | 3.93147  | 0.04622 | 638.12476  | 0.44563 |
| 3017 | 4556.47437 | 22.53187 | 12748.37876 | 611.16256 | 5.05142  | 0.02746 | 755.21156  | 0.40184 |
| 3018 | 4244.35615 | 17.31827 | 7624.91279  | 720.82624 | 0.05455  | 0.02054 | 808.35670  | 0.53652 |
| 3019 | 4556.64945 | 10.60337 | 15031.20455 | 85.35439  | -0.98123 | 0.00003 | 75.55914   | 1.21065 |
| 3020 | 3429.96409 | 8.10496  | 13702.52311 | 348.81094 | 1.32947  | 0.03405 | 372.82148  | 0.46328 |
| 3021 | 5022.94054 | 18.23926 | 10111.15720 | 554.28510 | 1.63577  | 0.01720 | 793.44848  | 0.24074 |
| 3022 | 4573.76914 | 7.64524  | 8692.45096  | 395.24025 | -2.14625 | 0.00424 | 562.83954  | 0.08013 |
| 3023 | 4885.97360 | 19.81606 | 11145.01651 | 367.11996 | 3.59759  | 0.06662 | 488.76553  | 0.39802 |
| 3024 | 4333.80914 | 17.14822 | 8144.40452  | 559.46194 | 3.85980  | 0.04590 | 604.37574  | 0.35540 |
| 3025 | 3925.51999 | 20.02104 | 9498.98055  | 718.02586 | 6.40803  | 0.05471 | 578.95289  | 0.63421 |
| 3026 | 4419.87303 | 17.90998 | 7191.91132  | 654.38078 | 1.74764  | 0.03475 | 789.94887  | 0.31704 |
| 3027 | 4504.57246 | 16.53741 | 9006.67152  | 520.99904 | -0.72497 | 0.02845 | 615.33840  | 0.43873 |
| 3028 | 4365.59821 | 18.84103 | 9568.85485  | 482.43733 | 3.90132  | 0.05456 | 530.27203  | 0.32686 |
| 3029 | 4407.97743 | 15.30810 | 24209.11983 | 79.70575  | -1.23054 | 0.00035 | 56.08433   | 0.36628 |
| 3030 | 4338.37078 | 17.13011 | 8210.70104  | 611.64091 | 2.05946  | 0.03821 | 653.48936  | 0.32453 |
| 3031 | 4673.48675 | 18.85781 | 12267.50557 | 436.22554 | 5.21097  | 0.04019 | 535.86502  | 0.37512 |
| 3032 | 5253.29426 | 15.47094 | 9493.08029  | 45.74984  | -3.60787 | 0.00014 | 27.41648   | 1.19468 |
| 3033 | 3679.75153 | 7.68987  | 5917.53136  | 379.52142 | -1.52456 | 0.02104 | 356.16011  | 0.52776 |
| 3034 | 4825.57202 | 8.77376  | 9326.73253  | 117.22429 | -0.44633 | 0.00406 | 116.22602  | 0.68400 |
| 3035 | 3540.04257 | 16.81061 | 17360.19484 | 492.51738 | 1.20632  | 0.14578 | 461.15447  | 0.71600 |
| 3036 | 2587.76820 | 26.06346 | 11160.35956 | 773.71631 | 8.57863  | 0.18944 | 511.50954  | 1.05545 |
| 3037 | 2926.78324 | 26.31837 | 12626.10919 | 539.45226 | 6.50289  | 0.13830 | 290.10720  | 1.57060 |
| 3038 | 4374.54189 | 20.45841 | 9923.16926  | 563.48860 | 2.92513  | 0.04201 | 622.70719  | 0.46104 |
| 3039 | 3127.97734 | 15.52995 | 6678.24980  | 304.82597 | 1.64888  | 0.01468 | 250.36682  | 0.20759 |
| 3040 | 4603.92033 | 22.30013 | 8602.24756  | 661.53565 | 2.28349  | 0.06300 | 796.06402  | 0.33552 |
| 3041 | 4794.53032 | 10.36002 | 11106.67509 | 577.27660 | 0.68915  | 0.02908 | 745.94223  | 0.44183 |
| 3042 | 4637.33335 | 16.97281 | 10122.36697 | 516.79182 | 4.83998  | 0.06885 | 716.06115  | 0.54993 |
| 3043 | 4089.18611 | 18.94421 | 6755.72453  | 665.32616 | 3.16951  | 0.06416 | 690.92264  | 0.62888 |
| 3044 | 3693.16018 | 14.11520 | 10419.33928 | 364.11589 | -0.10186 | 0.05348 | 329.39821  | 0.69752 |
| 3045 | 3599.34331 | 13.07356 | 19942.03378 | 303.52649 | 1.61011  | 0.02083 | 340.15506  | 0.36981 |
| 3046 | 4146.98179 | 16.37103 | 8962.43466  | 661.14667 | -1.26451 | 0.01853 | 734.59366  | 0.45538 |
| 3047 | 4957.45785 | 6.62207  | 10613.05053 | 405.93955 | -3.70363 | 0.00600 | 589.42273  | 0.16829 |

|      |            |          |             |           |          |         |           |         |
|------|------------|----------|-------------|-----------|----------|---------|-----------|---------|
| 3048 | 3575.65770 | 13.34603 | 5213.25301  | 575.21593 | 2.33431  | 0.03643 | 550.51208 | 0.68936 |
| 3049 | 4749.38124 | 21.54848 | 19533.66922 | 593.05626 | 4.68975  | 0.03494 | 756.82040 | 0.37215 |
| 3050 | 4794.15828 | 10.36280 | 11110.54911 | 613.85068 | 1.19925  | 0.03491 | 783.24667 | 0.40512 |
| 3051 | 4644.46494 | 15.45117 | 8184.38629  | 372.69985 | 5.73786  | 0.10489 | 505.59580 | 0.46486 |
| 3052 | 4493.64079 | 15.25537 | 23089.76424 | 78.86099  | -0.37389 | 0.00035 | 50.82376  | 0.35393 |
| 3053 | 3381.84778 | 7.67569  | 13566.12675 | 264.43306 | 0.91264  | 0.03029 | 206.96857 | 0.57112 |
| 3054 | 3138.50933 | 13.17356 | 8693.68010  | 680.21008 | 3.96311  | 0.32042 | 580.97161 | 0.82043 |
| 3055 | 4794.30406 | 10.35274 | 11099.25255 | 675.85864 | 0.51748  | 0.03164 | 872.40647 | 0.45481 |
| 3056 | 3504.31040 | 15.38024 | 11571.68134 | 544.39509 | 1.83635  | 0.09259 | 503.56675 | 0.45854 |
| 3057 | 4967.15813 | 9.86371  | 8837.44544  | 405.59413 | 0.70238  | 0.00702 | 575.85353 | 0.17106 |
| 3058 | 4342.78386 | 18.74753 | 7874.98414  | 271.69887 | 7.34506  | 0.10886 | 294.72290 | 0.48926 |
| 3059 | 4645.09373 | 20.80576 | 9223.00088  | 521.54776 | 2.98712  | 0.06974 | 655.84330 | 0.49139 |
| 3060 | 3473.73377 | 13.91577 | 7297.11523  | 616.33983 | 3.01105  | 0.06468 | 589.23503 | 0.57149 |
| 3061 | 3910.16870 | 11.56134 | 15487.83734 | 139.90971 | -1.36863 | 0.00440 | 139.53603 | 0.59771 |
| 3062 | 4294.91702 | 17.68851 | 7541.79568  | 833.53581 | 4.07165  | 0.05155 | 853.10564 | 0.43500 |
| 3063 | 3539.49316 | 17.41359 | 8025.79642  | 452.88996 | -0.14094 | 0.05840 | 485.87359 | 0.53238 |
| 3064 | 3754.52094 | 12.36688 | 6483.93707  | 391.71038 | -0.44479 | 0.01789 | 441.21119 | 0.36208 |
| 3065 | 4297.09174 | 15.21845 | 12170.90078 | 584.40353 | -1.64019 | 0.02011 | 684.42024 | 0.27401 |
| 3066 | 3766.24252 | 11.90715 | 9267.62570  | 509.11033 | 0.81198  | 0.03069 | 471.99714 | 0.49545 |
| 3067 | 4972.87922 | 8.58918  | 9174.24500  | 245.09851 | 0.47756  | 0.00340 | 357.64150 | 0.11831 |
| 3068 | 4769.26288 | 14.66399 | 12328.38522 | 394.53606 | 2.59255  | 0.01942 | 561.73229 | 0.36590 |
| 3069 | 4281.62354 | 14.16983 | 6881.66883  | 494.52111 | -2.25770 | 0.02028 | 561.77353 | 0.47957 |
| 3070 | 4455.14926 | 19.58295 | 5659.10293  | 602.64752 | 2.13875  | 0.03025 | 719.42578 | 0.46491 |
| 3071 | 4669.42279 | 16.51265 | 16624.85109 | 338.57328 | 5.48648  | 0.09915 | 441.81949 | 0.43315 |
| 3072 | 4337.27181 | 16.11335 | 9327.29836  | 374.41784 | 5.43746  | 0.10791 | 512.81228 | 0.43911 |
| 3073 | 4241.05374 | 24.67141 | 8285.76167  | 596.16784 | 1.61121  | 0.02003 | 676.22261 | 0.30164 |
| 3074 | 4604.69783 | 20.65254 | 21018.83757 | 341.38164 | 5.23631  | 0.07738 | 424.82632 | 0.48861 |
| 3075 | 4553.40097 | 22.52606 | 12865.39085 | 569.39139 | 4.38928  | 0.02415 | 695.82468 | 0.36225 |
| 3076 | 3735.87129 | 11.65163 | 8695.14491  | 660.69354 | 2.29237  | 0.03130 | 667.68407 | 0.61501 |
| 3077 | 3345.54000 | 19.52794 | 17826.70468 | 332.56351 | 0.82734  | 0.13724 | 254.41913 | 0.75169 |
| 3078 | 4877.82770 | 16.87714 | 8566.61554  | 482.98019 | 2.89613  | 0.06619 | 647.73166 | 0.37225 |
| 3079 | 4602.32767 | 22.29231 | 8594.84938  | 625.75813 | 3.25891  | 0.06579 | 736.52885 | 0.34427 |
| 3080 | 4068.02844 | 25.70102 | 8968.96221  | 702.51790 | 2.47855  | 0.01294 | 717.10392 | 0.36851 |
| 3081 | 4326.05749 | 17.05293 | 8099.89886  | 549.92958 | 3.78471  | 0.05336 | 571.06101 | 0.31394 |
| 3082 | 4077.93828 | 21.81099 | 8930.84664  | 882.41748 | 3.13301  | 0.03845 | 864.80798 | 0.51923 |
| 3083 | 4377.58772 | 18.82019 | 8561.04137  | 642.24520 | 2.25649  | 0.04426 | 706.55986 | 0.41093 |
| 3084 | 4843.67507 | 12.56306 | 13050.56536 | 339.80109 | 3.02823  | 0.02130 | 469.43045 | 0.31729 |
| 3085 | 3309.60853 | 19.03495 | 19313.02613 | 321.50260 | 1.70489  | 0.19540 | 248.45323 | 0.92630 |
| 3086 | 4468.55513 | 20.39980 | 10294.10920 | 727.95870 | 4.25571  | 0.01991 | 926.18135 | 0.31251 |
| 3087 | 4339.06304 | 17.14747 | 8213.42989  | 636.60035 | 3.02022  | 0.03851 | 684.44793 | 0.36704 |
| 3088 | 3861.70523 | 23.99019 | 12331.30904 | 756.73336 | 6.45208  | 0.02084 | 754.12571 | 0.06972 |
| 3089 | 4497.05360 | 22.63150 | 7693.99140  | 580.65620 | 4.09133  | 0.14443 | 684.68373 | 0.73436 |
| 3090 | 4334.64912 | 17.29180 | 8160.52558  | 655.95595 | 2.19188  | 0.04170 | 733.20214 | 0.35232 |
| 3091 | 3213.92853 | 19.22624 | 13161.28091 | 428.01095 | 3.09243  | 0.19920 | 333.62754 | 0.87101 |
| 3092 | 4779.47694 | 10.39203 | 11644.94117 | 547.47924 | -1.26950 | 0.01000 | 719.46504 | 0.14268 |
| 3093 | 4380.95616 | 18.72733 | 8625.02288  | 637.85615 | 1.06875  | 0.03686 | 697.66807 | 0.39437 |
| 3094 | 4648.18896 | 20.87955 | 8747.45342  | 605.71935 | 3.56207  | 0.09320 | 747.50635 | 0.51888 |
| 3095 | 4246.74995 | 19.01775 | 7262.93847  | 730.53533 | 3.66597  | 0.04588 | 793.36281 | 0.45656 |
| 3096 | 4341.81318 | 16.17464 | 9371.84862  | 421.21120 | 5.62407  | 0.09934 | 571.34129 | 0.44310 |
| 3097 | 3768.60812 | 9.58209  | 8349.27159  | 506.04812 | 0.33707  | 0.05396 | 525.37383 | 0.58685 |
| 3098 | 2950.88933 | 17.37236 | 15030.42424 | 317.69124 | 3.34448  | 0.21544 | 283.79319 | 0.78957 |
| 3099 | 4573.49334 | 10.36440 | 9294.02390  | 399.17267 | -2.16871 | 0.03197 | 488.17329 | 0.28374 |
| 3100 | 4523.64651 | 19.94513 | 7358.97324  | 602.26202 | 1.49176  | 0.04580 | 741.25140 | 0.42418 |
| 3101 | 3977.29220 | 21.38343 | 14590.47599 | 74.07489  | 2.81830  | 0.01548 | 31.55901  | 1.11947 |
| 3102 | 4006.84497 | 21.01164 | 15063.11488 | 99.08581  | 2.31136  | 0.01610 | 62.92588  | 0.81084 |
| 3103 | 4878.77290 | 19.74771 | 11051.79878 | 227.48567 | 3.25267  | 0.07473 | 271.77524 | 0.35364 |
| 3104 | 2841.60583 | 15.14781 | 14615.72906 | 364.80955 | 4.86731  | 0.22883 | 269.66516 | 0.69621 |
| 3105 | 3506.68221 | 15.33789 | 11577.68343 | 441.01830 | 1.94467  | 0.09164 | 378.33472 | 0.50188 |
| 3106 | 3160.16828 | 16.94367 | 9568.65047  | 426.28104 | 3.31298  | 0.24066 | 306.65555 | 0.61268 |
| 3107 | 4928.47536 | 7.62695  | 9056.27531  | 368.26051 | -3.61743 | 0.00051 | 543.23157 | 0.03233 |
| 3108 | 4759.72190 | 18.18863 | 10684.38307 | 455.53738 | 1.28069  | 0.03157 | 595.74914 | 0.38385 |
| 3109 | 3736.55461 | 13.09857 | 13573.83630 | 192.98937 | -1.55764 | 0.00332 | 225.44565 | 0.29899 |
| 3110 | 4582.20962 | 18.00188 | 8207.09638  | 495.49677 | 1.31661  | 0.02762 | 664.92635 | 0.28527 |
| 3111 | 4575.91530 | 10.22642 | 9291.67784  | 416.35278 | -3.52430 | 0.01970 | 532.01770 | 0.26425 |
| 3112 | 3182.40804 | 18.26404 | 10580.42929 | 458.59500 | 3.24224  | 0.17623 | 441.21498 | 0.77422 |
| 3113 | 3474.29646 | 13.90423 | 7306.79630  | 535.13541 | 2.69379  | 0.06500 | 440.99976 | 0.56268 |
| 3114 | 3858.35817 | 24.40665 | 6380.95675  | 812.03679 | 2.98678  | 0.01822 | 774.26348 | 0.58477 |
| 3115 | 4498.04162 | 21.27821 | 8794.02046  | 503.90040 | 5.65783  | 0.08309 | 566.42507 | 0.61491 |
| 3116 | 4411.25392 | 17.86540 | 7007.16040  | 602.92331 | 2.33326  | 0.04038 | 666.87591 | 0.42177 |
| 3117 | 3926.81362 | 20.02079 | 9521.00027  | 764.34651 | 6.27793  | 0.05406 | 682.48903 | 0.65022 |
| 3118 | 4642.36043 | 20.13180 | 9513.41280  | 377.07859 | 4.84613  | 0.04583 | 521.97956 | 0.34305 |



|      |            |          |             |            |          |         |           |         |
|------|------------|----------|-------------|------------|----------|---------|-----------|---------|
| 3119 | 4174.34317 | 18.94617 | 8216.91367  | 862.43323  | 1.72411  | 0.03317 | 881.86261 | 0.48118 |
| 3120 | 3710.34572 | 25.58445 | 8021.56901  | 91.96226   | 4.50462  | 0.00698 | 46.29873  | 1.15866 |
| 3121 | 5094.68178 | 9.85448  | 14659.40020 | 89.28495   | -0.59975 | 0.00210 | 83.76111  | 0.33582 |
| 3122 | 4449.75402 | 20.41930 | 11014.64068 | 795.12880  | 3.56846  | 0.01660 | 968.06143 | 0.25306 |
| 3123 | 4911.60706 | 12.72907 | 7776.00314  | 347.48005  | 2.62386  | 0.03410 | 463.47831 | 0.31874 |
| 3124 | 4266.56742 | 16.16315 | 7777.68731  | 779.45687  | 2.40688  | 0.05424 | 824.51800 | 0.51395 |
| 3125 | 4761.31775 | 18.32667 | 10570.47423 | 618.45382  | 2.62282  | 0.04947 | 767.35512 | 0.31500 |
| 3126 | 4059.01264 | 19.61809 | 16494.02344 | 49.28363   | 1.84015  | 0.01821 | 12.61290  | 0.76810 |
| 3127 | 4843.55723 | 15.77594 | 10229.60643 | 346.74977  | 3.10401  | 0.02770 | 508.85441 | 0.26272 |
| 3128 | 2571.46727 | 15.20903 | 10815.82218 | 485.03828  | 4.88199  | 0.24374 | 469.26085 | 0.68011 |
| 3129 | 4789.63461 | 10.23096 | 11130.58631 | 573.86917  | -0.09143 | 0.02545 | 733.43836 | 0.36681 |
| 3130 | 4084.49430 | 18.97769 | 6701.31984  | 717.62670  | 3.43178  | 0.07276 | 739.06784 | 0.60242 |
| 3131 | 4966.43013 | 9.95379  | 8590.84788  | 209.96978  | 1.00419  | 0.00433 | 298.08198 | 0.18291 |
| 3132 | 4238.67404 | 17.44533 | 7565.12001  | 720.47789  | 1.35313  | 0.02834 | 794.97535 | 0.45544 |
| 3133 | 3864.17162 | 23.97699 | 11298.71701 | 70.34427   | 2.64611  | 0.00568 | 23.21448  | 1.67463 |
| 3134 | 4504.52442 | 16.54174 | 8919.31114  | 581.70700  | -0.84093 | 0.02753 | 692.56079 | 0.43057 |
| 3135 | 3913.70488 | 12.90817 | 12502.52766 | 324.78056  | -0.29112 | 0.03188 | 372.91550 | 0.32058 |
| 3136 | 4037.34478 | 9.18475  | 11771.62176 | 231.98337  | -1.85153 | 0.00652 | 320.42536 | 0.12047 |
| 3137 | 4961.56941 | 10.84739 | 10169.06928 | 100.53803  | 0.65839  | 0.00304 | 110.14871 | 0.28159 |
| 3138 | 4832.10481 | 14.38027 | 11289.87757 | 334.92315  | 3.58891  | 0.03128 | 501.47588 | 0.24315 |
| 3139 | 4423.45289 | 11.42792 | 8382.17421  | 519.42533  | -2.13993 | 0.01069 | 637.25846 | 0.29631 |
| 3140 | 4465.15778 | 21.78692 | 8022.34280  | 605.27940  | 2.38356  | 0.02787 | 770.71025 | 0.32437 |
| 3141 | 4464.06655 | 21.77448 | 7638.64083  | 409.04757  | 4.56806  | 0.03792 | 505.91421 | 0.24846 |
| 3142 | 4123.20265 | 12.02407 | 13633.03214 | 89.80112   | -2.38965 | 0.00201 | 63.98681  | 1.40891 |
| 3143 | 3678.85568 | 7.66365  | 5914.98619  | 363.57710  | 0.06028  | 0.02326 | 363.11731 | 0.52836 |
| 3144 | 3657.14200 | 23.85256 | 10496.44552 | 1078.65771 | 6.94724  | 0.06956 | 906.43341 | 1.15869 |
| 3145 | 3539.41615 | 16.68301 | 17360.07448 | 397.38429  | 1.56059  | 0.12975 | 321.18858 | 0.78421 |
| 3146 | 4897.25335 | 9.56465  | 10174.26570 | 486.60874  | -1.08299 | 0.02212 | 640.30160 | 0.37058 |
| 3147 | 4847.36394 | 13.31046 | 10775.64196 | 395.07604  | 3.02746  | 0.02402 | 593.50355 | 0.29933 |
| 3148 | 3856.50433 | 23.84785 | 7226.55752  | 713.21763  | 6.38924  | 0.06472 | 748.06769 | 0.43420 |
| 3149 | 3766.02397 | 11.90564 | 9262.90460  | 707.27525  | 2.33727  | 0.03305 | 686.83401 | 0.66840 |
| 3150 | 4292.98020 | 16.95896 | 19249.47083 | 70.92210   | 2.10857  | 0.01429 | 32.14480  | 1.10799 |
| 3151 | 4333.17036 | 17.26887 | 8151.71834  | 555.34599  | 2.77243  | 0.04070 | 589.42044 | 0.35270 |
| 3152 | 3838.65320 | 20.22407 | 6319.14174  | 785.91016  | 2.17944  | 0.02465 | 791.99534 | 0.37978 |
| 3153 | 4771.20855 | 18.45860 | 10686.89955 | 735.41315  | 1.64038  | 0.03373 | 933.06459 | 0.37820 |
| 3154 | 3384.55731 | 24.42280 | 11995.93858 | 488.75082  | 2.91282  | 0.05197 | 366.69092 | 0.66136 |
| 3155 | 4770.20712 | 8.17837  | 9891.30701  | 308.27225  | -4.33974 | 0.00267 | 443.94750 | 0.06900 |
| 3156 | 4146.98347 | 16.37301 | 8961.45454  | 548.07836  | -0.88018 | 0.01871 | 608.74523 | 0.45672 |
| 3157 | 4991.28121 | 6.99424  | 9317.97651  | 297.58700  | -4.66647 | 0.00024 | 429.94224 | 0.03082 |
| 3158 | 3599.49318 | 13.05433 | 24889.19713 | 313.18961  | 1.56884  | 0.01493 | 369.02190 | 0.30378 |
| 3159 | 4464.94614 | 21.78877 | 7664.35158  | 500.35569  | 3.68035  | 0.03701 | 642.59798 | 0.22356 |
| 3160 | 4365.70868 | 18.84540 | 9566.06415  | 508.66515  | 2.64212  | 0.04795 | 588.21064 | 0.38800 |
| 3161 | 4847.34580 | 13.30880 | 11062.52886 | 362.22495  | 2.03376  | 0.02213 | 543.72057 | 0.28455 |
| 3162 | 4553.77597 | 22.52612 | 12733.70848 | 523.10214  | 4.63201  | 0.02632 | 649.33418 | 0.38490 |
| 3163 | 4348.16821 | 18.81965 | 7877.23908  | 562.26510  | 4.89336  | 0.10381 | 691.37851 | 0.49454 |
| 3164 | 3776.49198 | 12.11531 | 9410.45701  | 557.41049  | -0.00915 | 0.02898 | 556.90480 | 0.49672 |
| 3165 | 3670.35766 | 14.09888 | 9936.70014  | 417.36199  | 1.83194  | 0.06531 | 414.07297 | 0.66798 |
| 3166 | 5019.16766 | 13.77679 | 8456.70060  | 335.00112  | 1.89055  | 0.01562 | 490.82952 | 0.19080 |
| 3167 | 4706.54807 | 19.16744 | 9942.82274  | 516.72185  | -0.71755 | 0.04342 | 665.67548 | 0.28812 |
| 3168 | 4145.88057 | 16.44265 | 8934.02274  | 673.81570  | 0.09441  | 0.01935 | 752.51154 | 0.39552 |
| 3169 | 5003.06960 | 7.78545  | 14887.18973 | 189.99325  | -1.19502 | 0.00183 | 279.89598 | 0.08577 |
| 3170 | 4846.03258 | 13.58147 | 12131.52467 | 556.23913  | 2.23326  | 0.03546 | 708.74362 | 0.45603 |
| 3171 | 4425.62019 | 11.53601 | 8408.48253  | 480.97089  | -1.98974 | 0.01081 | 600.63064 | 0.26991 |
| 3172 | 4079.23435 | 21.82855 | 8927.39623  | 622.05079  | 1.85386  | 0.03027 | 631.09387 | 0.50902 |
| 3173 | 3437.40782 | 8.17005  | 13789.22912 | 300.01086  | 1.41378  | 0.03483 | 306.17302 | 0.35891 |
| 3174 | 3376.48661 | 20.20318 | 10336.66045 | 178.53733  | 5.01255  | 0.01902 | 178.31605 | 1.00636 |
| 3175 | 4612.98708 | 22.34955 | 8681.19518  | 525.63381  | 2.26646  | 0.04394 | 645.94782 | 0.43797 |
| 3176 | 5010.75447 | 6.81065  | 11183.97916 | 273.42483  | -3.24966 | 0.00102 | 409.88767 | 0.03903 |
| 3177 | 2906.58812 | 16.20315 | 14883.79685 | 434.95132  | 4.84661  | 0.20563 | 431.21892 | 0.57687 |
| 3178 | 3345.68270 | 24.28962 | 10871.66802 | 861.90635  | 8.97441  | 0.21433 | 482.28702 | 2.00204 |
| 3179 | 4911.13697 | 13.65675 | 8083.82642  | 480.52055  | 3.05304  | 0.01762 | 705.16285 | 0.21023 |
| 3180 | 4904.48510 | 13.49062 | 8067.77159  | 499.43385  | 2.34600  | 0.01669 | 725.00770 | 0.21797 |
| 3181 | 4418.88341 | 16.92406 | 10233.97258 | 576.53885  | 5.68580  | 0.08051 | 757.64509 | 0.60202 |
| 3182 | 3535.26563 | 17.40783 | 7930.08956  | 393.28310  | 0.45715  | 0.05487 | 381.23490 | 0.56993 |
| 3183 | 4569.03225 | 22.53776 | 13098.27612 | 433.67458  | 5.12271  | 0.02556 | 541.52441 | 0.42163 |
| 3184 | 3740.61572 | 11.70757 | 7553.82810  | 825.20285  | 2.92383  | 0.02660 | 795.86467 | 0.52758 |
| 3185 | 5009.34910 | 10.09811 | 8303.69416  | 290.91980  | 1.86132  | 0.00608 | 425.72851 | 0.11881 |
| 3186 | 4281.55817 | 14.22984 | 6831.67159  | 523.99507  | -1.11254 | 0.02422 | 568.91983 | 0.38849 |
| 3187 | 4609.13168 | 18.88358 | 7972.14927  | 453.58775  | 4.71835  | 0.03905 | 611.68907 | 0.25059 |
| 3188 | 4635.11325 | 15.37454 | 10159.03756 | 341.09139  | 4.08830  | 0.08152 | 464.96009 | 0.43259 |
| 3189 | 3736.06004 | 11.64778 | 8701.46339  | 693.25427  | 1.92301  | 0.03298 | 689.72830 | 0.54784 |

|      |            |          |             |           |          |         |           |         |
|------|------------|----------|-------------|-----------|----------|---------|-----------|---------|
| 3190 | 4885.93282 | 9.34648  | 12605.02558 | 419.27478 | 3.87400  | 0.02164 | 623.36883 | 0.22224 |
| 3191 | 4280.24828 | 14.19892 | 6851.02947  | 679.98395 | 0.38681  | 0.03133 | 777.65490 | 0.36627 |
| 3192 | 5021.05231 | 13.82713 | 8451.36728  | 277.96839 | 2.63034  | 0.01654 | 407.86300 | 0.20274 |
| 3193 | 4573.96085 | 10.45007 | 9311.22743  | 423.28404 | -3.26820 | 0.01992 | 540.31144 | 0.20470 |
| 3194 | 3947.61564 | 20.03042 | 9576.39769  | 559.94292 | 5.67439  | 0.05200 | 444.67989 | 0.67600 |
| 3195 | 4712.29395 | 15.85037 | 11391.47955 | 485.32427 | 4.49133  | 0.05622 | 640.39811 | 0.34201 |
| 3196 | 4615.69586 | 22.39555 | 8671.25736  | 673.90894 | 1.71994  | 0.04581 | 840.37856 | 0.37712 |
| 3197 | 4430.29961 | 14.64133 | 6228.72551  | 690.31343 | 3.43773  | 0.02766 | 779.04509 | 0.33544 |
| 3198 | 3379.85464 | 9.59233  | 6921.32862  | 386.96142 | 2.65814  | 0.05077 | 347.93951 | 0.50917 |
| 3199 | 3917.25715 | 12.98288 | 12073.00262 | 389.98663 | -0.23042 | 0.03086 | 429.15763 | 0.46815 |
| 3200 | 4281.67764 | 17.72707 | 7485.36559  | 819.24373 | 2.41729  | 0.04175 | 891.60173 | 0.50228 |
| 3201 | 5118.05932 | 10.98971 | 9833.58487  | 62.62575  | -3.36307 | 0.00073 | 41.61275  | 0.70193 |
| 3202 | 4977.91875 | 9.90946  | 9388.96275  | 337.22989 | -1.10267 | 0.00703 | 469.81569 | 0.14620 |
| 3203 | 4504.62584 | 16.54498 | 8920.15317  | 426.08340 | -0.53049 | 0.02765 | 488.69203 | 0.42865 |
| 3204 | 2557.43960 | 15.74023 | 11678.02750 | 429.80105 | 5.89538  | 0.23931 | 348.48177 | 0.33347 |
| 3205 | 4506.82682 | 16.69462 | 8857.50734  | 463.12249 | 0.61317  | 0.03315 | 512.84876 | 0.33984 |
| 3206 | 4889.87448 | 9.43375  | 12736.97158 | 371.64177 | 2.86060  | 0.01909 | 558.78222 | 0.26921 |
| 3207 | 4713.44562 | 15.86248 | 11394.61878 | 554.94794 | 4.08491  | 0.05670 | 749.48160 | 0.36366 |
| 3208 | 4630.72298 | 7.75205  | 16309.28629 | 120.56367 | -0.56518 | 0.00003 | 141.96098 | 0.09694 |
| 3209 | 4620.66867 | 7.79736  | 16875.24363 | 132.95180 | -4.01916 | 0.00002 | 164.51635 | 0.07404 |
| 3210 | 4898.98255 | 16.87160 | 8799.38135  | 494.85469 | 2.30107  | 0.04389 | 649.30065 | 0.42029 |
| 3211 | 3832.35835 | 15.77980 | 8632.67793  | 536.75201 | 1.64665  | 0.03484 | 507.61612 | 0.52171 |
| 3212 | 3425.52821 | 8.06674  | 13609.22042 | 317.08962 | 1.93787  | 0.03713 | 291.57565 | 0.42640 |
| 3213 | 5002.94416 | 7.78229  | 13758.12314 | 186.89587 | -0.91445 | 0.00203 | 271.01479 | 0.07278 |
| 3214 | 4298.22245 | 10.79343 | 10400.41393 | 152.20040 | -2.19003 | 0.00021 | 186.84744 | 0.71330 |
| 3215 | 2963.73483 | 24.99671 | 6965.23325  | 485.26190 | 6.30389  | 0.17868 | 233.00404 | 0.92877 |
| 3216 | 5022.45389 | 18.23318 | 9219.48214  | 329.29833 | 2.41931  | 0.01741 | 466.71479 | 0.21918 |
| 3217 | 4287.18239 | 17.64769 | 7507.53486  | 732.92895 | 3.47591  | 0.04460 | 759.46337 | 0.42818 |
| 3218 | 4218.76694 | 11.81206 | 11608.84054 | 138.69982 | -1.07625 | 0.00099 | 143.18246 | 0.73673 |
| 3219 | 3534.74265 | 17.40530 | 7953.94842  | 383.75423 | 0.43075  | 0.04725 | 344.83277 | 0.58577 |
| 3220 | 3864.16572 | 23.89662 | 12147.36929 | 767.89934 | 7.52498  | 0.02098 | 903.72033 | 0.06614 |
| 3221 | 3753.23016 | 12.23227 | 6483.92160  | 324.39916 | -2.17207 | 0.01643 | 329.87627 | 0.39319 |
| 3222 | 4334.27907 | 18.59609 | 7800.21684  | 477.28910 | 4.97142  | 0.08268 | 589.35674 | 0.45293 |
| 3223 | 4843.80092 | 12.55961 | 13091.73354 | 300.55530 | 2.27926  | 0.02258 | 408.01509 | 0.32824 |
| 3224 | 3913.37498 | 12.96777 | 12049.52169 | 339.60438 | 0.25475  | 0.03780 | 340.27515 | 0.43915 |
| 3225 | 3392.91593 | 11.71675 | 7599.40310  | 429.04026 | 1.67744  | 0.08661 | 301.88783 | 0.58361 |
| 3226 | 5020.02314 | 13.80311 | 8424.49913  | 414.87483 | 2.07871  | 0.01675 | 613.97282 | 0.20607 |
| 3227 | 4852.04132 | 13.67252 | 11907.65153 | 341.81680 | 2.96338  | 0.04052 | 414.99149 | 0.48924 |
| 3228 | 4968.34546 | 9.88573  | 8843.90719  | 341.80996 | 1.45646  | 0.00769 | 478.02032 | 0.16330 |
| 3229 | 4709.44009 | 19.22747 | 12652.68849 | 446.93929 | 3.67575  | 0.07924 | 593.49523 | 0.55361 |
| 3230 | 3735.60782 | 21.46129 | 12065.97288 | 89.39946  | 3.56535  | 0.01349 | 41.03935  | 0.80213 |
| 3231 | 4911.72579 | 12.72553 | 7779.00602  | 380.73021 | 2.90496  | 0.03466 | 514.54459 | 0.32340 |
| 3232 | 4958.75687 | 6.66779  | 9713.73148  | 406.25089 | -0.61987 | 0.00844 | 584.33518 | 0.18990 |
| 3233 | 5024.69107 | 18.12687 | 10148.34599 | 466.40507 | 2.66693  | 0.01552 | 667.25812 | 0.24780 |
| 3234 | 3428.56631 | 8.07840  | 13600.80950 | 322.43625 | 2.04913  | 0.03361 | 328.30483 | 0.42679 |
| 3235 | 4689.09652 | 13.73608 | 9805.68006  | 437.45213 | 3.53340  | 0.02115 | 520.96749 | 0.24180 |
| 3236 | 4496.88619 | 12.63128 | 9338.62779  | 641.98990 | -0.22656 | 0.02449 | 757.71931 | 0.28877 |
| 3237 | 2974.66153 | 25.04737 | 7102.04443  | 454.43006 | 6.55134  | 0.17557 | 203.58049 | 0.92015 |
| 3238 | 4885.63593 | 9.31684  | 12448.17127 | 365.90003 | 1.19163  | 0.01634 | 539.93602 | 0.27385 |
| 3239 | 4952.01827 | 10.75924 | 10210.48284 | 144.32394 | -0.03369 | 0.00323 | 178.52377 | 0.29179 |
| 3240 | 3255.81165 | 19.82720 | 13540.51623 | 399.01140 | 2.00376  | 0.17766 | 353.02124 | 0.90541 |
| 3241 | 4061.51730 | 9.08341  | 11640.44105 | 200.53719 | -1.44538 | 0.00525 | 268.14100 | 0.10877 |
| 3242 | 4472.07757 | 20.46573 | 13686.80766 | 490.66927 | 4.20439  | 0.10170 | 604.30074 | 0.47595 |
| 3243 | 3786.04572 | 19.91702 | 9519.80428  | 540.92529 | -0.51688 | 0.03308 | 519.99114 | 1.25591 |
| 3244 | 4569.40200 | 22.55429 | 13123.38305 | 590.56030 | 4.80416  | 0.02529 | 740.44632 | 0.38725 |
| 3245 | 4239.99221 | 17.39418 | 7587.12402  | 464.55778 | -0.25863 | 0.02171 | 500.87753 | 0.52009 |
| 3246 | 3489.18861 | 13.80322 | 7413.38290  | 566.23227 | 0.27603  | 0.05199 | 531.84728 | 0.71754 |
| 3247 | 4774.34098 | 10.20287 | 11719.89646 | 447.93286 | -1.74847 | 0.00769 | 605.41496 | 0.11616 |
| 3248 | 4505.43094 | 16.72531 | 8828.79983  | 591.43144 | 0.14973  | 0.03006 | 722.51290 | 0.29312 |
| 3249 | 4628.72335 | 7.75335  | 16236.26771 | 126.26204 | -1.49630 | 0.00003 | 156.19214 | 0.06989 |
| 3250 | 3173.39830 | 15.88165 | 12167.06356 | 412.99564 | 3.31098  | 0.10284 | 389.48405 | 0.76203 |
| 3251 | 4483.15646 | 20.67903 | 9741.80495  | 455.21062 | 5.03253  | 0.10589 | 536.39462 | 0.53934 |
| 3252 | 3654.47070 | 22.04283 | 12349.18788 | 118.78011 | 3.19729  | 0.01500 | 77.40681  | 0.69251 |
| 3253 | 3703.32161 | 7.83299  | 6093.23427  | 384.19481 | -2.12740 | 0.02113 | 394.15523 | 0.50489 |
| 3254 | 4344.49174 | 16.22967 | 9345.47496  | 369.15709 | 6.54073  | 0.07511 | 508.96410 | 0.44614 |
| 3255 | 2925.97062 | 20.00514 | 8243.80296  | 601.18958 | 4.20899  | 0.27912 | 485.54805 | 1.07354 |
| 3256 | 4239.55351 | 17.41764 | 7576.36228  | 636.98093 | 0.38038  | 0.02434 | 731.53818 | 0.48272 |
| 3257 | 4851.80448 | 13.64677 | 11914.33725 | 371.20597 | 2.64902  | 0.03899 | 456.30103 | 0.49414 |
| 3258 | 2558.21716 | 14.86702 | 4085.60073  | 398.35535 | 5.71238  | 0.29510 | 357.29918 | 1.65419 |
| 3259 | 4656.87849 | 7.56453  | 19419.18056 | 132.07411 | -4.43694 | 0.00003 | 169.25309 | 0.13736 |
| 3260 | 4322.18786 | 21.89029 | 8614.96531  | 734.56600 | 2.67247  | 0.03634 | 756.53251 | 0.53615 |

|      |            |          |             |            |          |         |            |         |
|------|------------|----------|-------------|------------|----------|---------|------------|---------|
| 3261 | 3776.47122 | 9.57853  | 8278.87986  | 471.83883  | -1.25001 | 0.04503 | 456.21549  | 0.64234 |
| 3262 | 4633.20183 | 15.36227 | 10175.69424 | 416.62991  | 3.84821  | 0.08111 | 579.79045  | 0.44342 |
| 3263 | 4467.73183 | 22.72612 | 7114.91148  | 547.13238  | 5.19583  | 0.15663 | 634.54294  | 0.64124 |
| 3264 | 3129.72870 | 15.60401 | 6668.96688  | 265.37747  | 2.59721  | 0.01106 | 182.08533  | 0.25291 |
| 3265 | 4334.67396 | 18.25994 | 6880.53421  | 481.85718  | 4.11112  | 0.03285 | 495.97401  | 0.50132 |
| 3266 | 4661.64732 | 18.77366 | 12232.93286 | 499.26576  | 6.05473  | 0.04645 | 625.51804  | 0.35684 |
| 3267 | 2971.89703 | 16.96648 | 15570.57808 | 369.06622  | 2.88603  | 0.14066 | 365.75395  | 0.83720 |
| 3268 | 3379.53961 | 9.60386  | 6913.54874  | 515.33880  | 2.67501  | 0.06996 | 515.17280  | 0.54645 |
| 3269 | 4921.34280 | 13.84950 | 8015.92456  | 528.72015  | 4.21685  | 0.01862 | 768.64181  | 0.18525 |
| 3270 | 3241.74821 | 18.30093 | 18196.55000 | 483.15910  | 3.46184  | 0.20771 | 417.33506  | 1.12192 |
| 3271 | 4412.43139 | 22.73304 | 8357.95876  | 578.42591  | 3.10060  | 0.01407 | 750.73328  | 0.30316 |
| 3272 | 4911.78179 | 12.72872 | 7781.71517  | 344.97063  | 1.76407  | 0.03581 | 459.92353  | 0.32915 |
| 3273 | 4967.93466 | 9.97319  | 8788.89093  | 273.89586  | 1.98487  | 0.00423 | 404.91250  | 0.19090 |
| 3274 | 3179.10441 | 15.84989 | 9654.87453  | 513.70075  | 3.15621  | 0.20061 | 399.87296  | 0.71798 |
| 3275 | 4632.40701 | 20.65775 | 9198.33831  | 589.29438  | 3.66807  | 0.07861 | 728.07174  | 0.50358 |
| 3276 | 3915.62686 | 12.97530 | 12068.90348 | 470.51058  | 0.21103  | 0.03358 | 545.46739  | 0.44645 |
| 3277 | 4298.93848 | 15.20984 | 12172.71403 | 407.24560  | -1.94126 | 0.01718 | 485.24124  | 0.32953 |
| 3278 | 4410.71251 | 17.89902 | 7008.73736  | 609.51994  | 1.76282  | 0.03378 | 663.39305  | 0.43026 |
| 3279 | 3860.20792 | 24.00887 | 12303.99685 | 845.95264  | 5.73686  | 0.01678 | 814.37245  | 0.04693 |
| 3280 | 2939.37347 | 26.33025 | 12771.32585 | 673.52705  | 5.58272  | 0.11055 | 436.04216  | 1.62719 |
| 3281 | 3901.27500 | 24.65020 | 10020.52794 | 1094.74452 | 8.15955  | 0.01534 | 998.78226  | 0.27281 |
| 3282 | 4422.22889 | 16.97803 | 10265.81880 | 328.59681  | 4.28315  | 0.07287 | 417.03671  | 0.60629 |
| 3283 | 4468.27311 | 20.43935 | 10336.56244 | 665.62764  | 3.75114  | 0.01867 | 807.38690  | 0.30957 |
| 3284 | 4888.63471 | 19.85025 | 11157.72028 | 419.23963  | 2.93197  | 0.06176 | 569.35482  | 0.38862 |
| 3285 | 4852.06800 | 13.66924 | 11896.27138 | 565.14675  | 1.80392  | 0.03714 | 717.37132  | 0.47729 |
| 3286 | 3993.17049 | 22.89992 | 7934.52645  | 806.25040  | 2.48958  | 0.03271 | 842.18544  | 0.54400 |
| 3287 | 5274.94002 | 15.64917 | 11635.21897 | 42.70664   | -3.16119 | 0.00013 | 18.49555   | 1.40009 |
| 3288 | 4636.95035 | 15.39787 | 10155.90262 | 303.00421  | 4.89208  | 0.09713 | 410.57737  | 0.45043 |
| 3289 | 4687.24450 | 21.35015 | 17485.16830 | 450.59463  | 4.66698  | 0.06535 | 559.27334  | 0.60294 |
| 3290 | 4547.55887 | 16.04704 | 11307.27224 | 353.47034  | 4.52427  | 0.07602 | 498.08628  | 0.39071 |
| 3291 | 3905.42430 | 24.72705 | 10054.70791 | 798.89613  | 6.14799  | 0.01431 | 780.87360  | 0.34910 |
| 3292 | 3735.38763 | 11.59496 | 8708.88164  | 429.60582  | 0.45541  | 0.03104 | 371.94240  | 0.58985 |
| 3293 | 4851.18919 | 13.63643 | 11910.72342 | 447.85246  | 2.24354  | 0.03891 | 580.40863  | 0.50004 |
| 3294 | 4972.23339 | 8.57282  | 9429.81336  | 281.53224  | -0.91754 | 0.00295 | 414.68399  | 0.12618 |
| 3295 | 3126.31564 | 18.13291 | 10416.01592 | 362.20142  | 3.49539  | 0.17924 | 277.38642  | 0.79814 |
| 3296 | 4977.87196 | 9.90827  | 8919.21931  | 360.21952  | 0.68771  | 0.00600 | 503.09280  | 0.15075 |
| 3297 | 4782.45411 | 16.51485 | 9808.26361  | 637.68815  | -0.11021 | 0.02832 | 826.09776  | 0.38743 |
| 3298 | 4897.09515 | 9.55253  | 10177.37092 | 562.91871  | -1.04469 | 0.02151 | 747.36640  | 0.35413 |
| 3299 | 4680.11881 | 21.50168 | 9186.44344  | 498.73916  | 3.81664  | 0.05683 | 609.11097  | 0.51696 |
| 3300 | 4748.50794 | 16.00183 | 21031.94492 | 286.07898  | 2.72742  | 0.05483 | 371.67039  | 0.65104 |
| 3301 | 3851.98048 | 24.38416 | 6301.51160  | 822.40175  | 3.29659  | 0.02076 | 875.62925  | 0.80686 |
| 3302 | 2546.95617 | 14.92310 | 3851.73418  | 416.29666  | 5.12461  | 0.29741 | 366.83297  | 1.61909 |
| 3303 | 4297.81335 | 15.20912 | 12152.75538 | 469.43793  | -1.25584 | 0.01885 | 532.37527  | 0.31413 |
| 3304 | 4894.03423 | 9.47539  | 10013.91981 | 506.77800  | 0.15735  | 0.02543 | 647.97259  | 0.39062 |
| 3305 | 3215.51545 | 16.54080 | 12170.87616 | 405.55618  | 3.13974  | 0.08249 | 353.71510  | 0.79955 |
| 3306 | 3532.95697 | 23.34851 | 9138.44793  | 1446.60188 | 7.19796  | 0.07654 | 1158.56606 | 1.28007 |
| 3307 | 4967.30051 | 8.62558  | 9994.17071  | 259.15814  | -2.10454 | 0.00302 | 375.58537  | 0.11650 |
| 3308 | 3215.57234 | 16.53383 | 12171.84737 | 333.25104  | 3.60080  | 0.08078 | 265.12439  | 0.80158 |
| 3309 | 4823.59242 | 20.86278 | 7813.06479  | 625.60319  | 3.92275  | 0.05001 | 756.65943  | 0.40951 |
| 3310 | 4871.19206 | 9.13343  | 9442.17927  | 110.42020  | 0.31685  | 0.00353 | 106.65646  | 0.71499 |
| 3311 | 2926.71118 | 26.34471 | 12686.03398 | 570.95884  | 6.97213  | 0.13804 | 299.71449  | 1.55227 |
| 3312 | 4196.45608 | 21.00959 | 10541.19352 | 616.69589  | 1.64884  | 0.03432 | 628.44626  | 0.51562 |
| 3313 | 4889.00891 | 9.38224  | 12721.03518 | 439.79569  | 2.72028  | 0.01535 | 661.13674  | 0.27339 |
| 3314 | 4424.45344 | 11.48579 | 8420.52837  | 651.47972  | 0.96410  | 0.01574 | 774.54074  | 0.19520 |
| 3315 | 4576.19327 | 10.21935 | 9305.60541  | 496.69699  | -3.26627 | 0.01926 | 631.27914  | 0.29855 |
| 3316 | 4264.46539 | 23.21563 | 13454.33636 | 1075.05153 | 3.89612  | 0.00948 | 1227.04414 | 0.12559 |
| 3317 | 5024.29525 | 18.12019 | 10151.54942 | 544.10402  | 2.59579  | 0.01578 | 768.44911  | 0.24946 |
| 3318 | 4293.74793 | 15.04647 | 12164.22937 | 465.54062  | -3.57383 | 0.01790 | 553.40175  | 0.37178 |
| 3319 | 4313.35395 | 21.87800 | 8563.09324  | 740.07666  | 2.81188  | 0.03268 | 778.51880  | 0.56044 |
| 3320 | 2929.99609 | 16.64496 | 15195.35739 | 281.24348  | 3.90442  | 0.19367 | 268.18146  | 0.68584 |
| 3321 | 4795.42554 | 10.38929 | 11120.87086 | 589.80645  | 0.85738  | 0.03224 | 738.87763  | 0.43414 |
| 3322 | 4919.60622 | 10.81534 | 8919.30006  | 139.26661  | 1.02389  | 0.00482 | 179.59060  | 0.12422 |
| 3323 | 3742.02637 | 11.75516 | 7573.67265  | 743.74868  | 2.47201  | 0.02491 | 737.30760  | 0.51867 |
| 3324 | 3576.93843 | 13.31724 | 5259.35940  | 569.42093  | 2.23006  | 0.03439 | 514.80575  | 0.72093 |
| 3325 | 4294.11028 | 15.00402 | 12180.64544 | 410.99267  | -2.72156 | 0.01750 | 476.37995  | 0.37254 |
| 3326 | 4433.07822 | 20.21682 | 8151.60654  | 573.02775  | 5.04746  | 0.12566 | 637.54743  | 0.54967 |
| 3327 | 4658.86502 | 19.54452 | 11870.19671 | 283.48431  | 5.00562  | 0.09806 | 366.89933  | 0.49110 |
| 3328 | 4294.19036 | 15.02609 | 12173.41281 | 424.25157  | -2.42631 | 0.01775 | 496.56114  | 0.37923 |
| 3329 | 3527.12929 | 17.29488 | 7913.73823  | 326.88388  | 1.11611  | 0.05859 | 292.20423  | 0.59248 |
| 3330 | 2446.46289 | 13.50482 | 3720.01967  | 334.45166  | 5.73609  | 0.24711 | 420.05229  | 0.67314 |
| 3331 | 3187.49699 | 16.61601 | 7079.45813  | 424.29454  | 1.98252  | 0.09227 | 369.10054  | 0.71387 |

|      |            |          |             |           |          |         |           |         |
|------|------------|----------|-------------|-----------|----------|---------|-----------|---------|
| 3332 | 4883.90294 | 19.80269 | 11105.32005 | 556.91622 | 2.37862  | 0.06681 | 762.59936 | 0.39215 |
| 3333 | 4195.91098 | 21.01317 | 10524.75310 | 730.64350 | 2.96182  | 0.03373 | 738.38234 | 0.48551 |
| 3334 | 4798.44629 | 16.82669 | 9915.25416  | 508.25616 | 0.61690  | 0.03407 | 674.42307 | 0.44790 |
| 3335 | 3683.03471 | 22.05685 | 12000.98635 | 122.55923 | 4.49703  | 0.01695 | 75.71079  | 0.70254 |
| 3336 | 4897.27961 | 13.45130 | 8143.18749  | 349.36710 | 1.37567  | 0.01658 | 506.67218 | 0.24078 |
| 3337 | 5022.32164 | 18.22987 | 10075.18396 | 415.89898 | 1.62029  | 0.01734 | 600.13016 | 0.19842 |
| 3338 | 4431.32203 | 15.52712 | 6481.01486  | 684.61246 | 2.88784  | 0.02751 | 758.55619 | 0.34561 |
| 3339 | 4616.53695 | 18.63935 | 8328.28720  | 438.32796 | 3.47607  | 0.03286 | 562.58881 | 0.36432 |
| 3340 | 3538.94007 | 9.38229  | 7262.03871  | 602.68893 | 2.19934  | 0.04347 | 572.85916 | 0.68963 |
| 3341 | 4656.46619 | 19.50544 | 12289.13112 | 401.17954 | 4.47899  | 0.10714 | 533.54214 | 0.42907 |
| 3342 | 3611.77633 | 12.41825 | 30888.71823 | 274.16312 | 1.32522  | 0.01693 | 282.12654 | 0.44966 |
| 3343 | 4847.35777 | 13.59988 | 12181.93941 | 435.75808 | 0.32582  | 0.03523 | 548.62948 | 0.45877 |
| 3344 | 2492.81573 | 14.32104 | 3918.72222  | 488.21892 | 5.03321  | 0.30421 | 515.67327 | 0.56781 |
| 3345 | 4783.55609 | 16.53591 | 9814.46205  | 475.95153 | -1.39382 | 0.03019 | 630.08572 | 0.30259 |
| 3346 | 4425.55641 | 17.35585 | 10710.62864 | 698.38147 | 2.24950  | 0.03529 | 763.43674 | 0.36490 |
| 3347 | 4520.67634 | 19.90562 | 7349.93947  | 612.34763 | 2.05222  | 0.04990 | 733.52270 | 0.44760 |
| 3348 | 4244.79719 | 17.30052 | 7631.72921  | 582.69835 | -0.89428 | 0.02151 | 651.42333 | 0.48769 |
| 3349 | 4442.02691 | 20.45769 | 8218.89020  | 397.58844 | 6.09064  | 0.09479 | 424.32587 | 0.52278 |
| 3350 | 4369.85051 | 18.86231 | 9577.24025  | 557.74051 | 3.41696  | 0.05273 | 622.93203 | 0.35591 |
| 3351 | 4449.91322 | 19.79108 | 8015.18087  | 413.65772 | 6.15725  | 0.07837 | 474.48665 | 0.59865 |
| 3352 | 3684.07884 | 25.46936 | 11860.98855 | 68.59396  | 3.15204  | 0.01001 | 23.38639  | 1.68542 |
| 3353 | 4885.64051 | 9.31712  | 12500.54095 | 447.22124 | 2.36789  | 0.01796 | 660.20559 | 0.27335 |
| 3354 | 3784.67207 | 13.15279 | 11695.71462 | 125.41420 | -1.76801 | 0.00495 | 102.69410 | 0.80656 |
| 3355 | 4575.99436 | 7.78037  | 8834.92617  | 256.57174 | -4.39524 | 0.00560 | 335.58732 | 0.10322 |
| 3356 | 3839.75514 | 20.21019 | 6338.90812  | 694.94074 | 1.82266  | 0.02403 | 696.85124 | 0.49951 |
| 3357 | 4295.61647 | 15.04417 | 12345.18590 | 490.54559 | -2.97591 | 0.01785 | 581.19707 | 0.38476 |
| 3358 | 4856.81220 | 15.85924 | 8388.16226  | 380.38583 | 5.48095  | 0.03200 | 564.96883 | 0.19574 |
| 3359 | 4672.44399 | 18.84521 | 12273.41442 | 421.48334 | 5.33415  | 0.03821 | 528.69414 | 0.38603 |
| 3360 | 4696.66916 | 18.28049 | 16708.11556 | 378.33124 | 4.38184  | 0.02896 | 485.37147 | 0.16759 |
| 3361 | 5020.19978 | 13.79268 | 8445.21609  | 404.58456 | 1.82207  | 0.01619 | 597.69340 | 0.18767 |
| 3362 | 3627.27407 | 17.40968 | 17083.26173 | 437.07690 | -0.65555 | 0.10093 | 414.21938 | 0.96666 |
| 3363 | 4984.33913 | 7.18778  | 16223.69291 | 124.38306 | -1.79552 | 0.00179 | 154.85595 | 0.12624 |
| 3364 | 4523.54548 | 19.93120 | 7366.79064  | 543.19327 | 2.22293  | 0.04701 | 655.32094 | 0.44689 |
| 3365 | 3858.04650 | 24.40082 | 6383.27652  | 771.08136 | 2.84283  | 0.01941 | 728.62583 | 0.50678 |
| 3366 | 4425.79791 | 11.52337 | 8403.34874  | 579.27068 | -0.66289 | 0.01153 | 735.22749 | 0.24779 |
| 3367 | 3234.28850 | 18.12637 | 18078.22871 | 474.25199 | 1.96261  | 0.19243 | 389.50063 | 1.13359 |
| 3368 | 4613.63937 | 22.35946 | 8687.86543  | 531.23963 | 3.01512  | 0.04371 | 622.85207 | 0.43643 |
| 3369 | 4280.89184 | 14.22190 | 6848.30834  | 594.18607 | 0.37227  | 0.03016 | 669.88018 | 0.35484 |
| 3370 | 4642.02980 | 22.37937 | 9727.58885  | 643.72294 | 2.86921  | 0.03684 | 816.77631 | 0.47398 |
| 3371 | 4770.85358 | 18.45604 | 10666.00514 | 656.49297 | 1.00862  | 0.03525 | 847.81545 | 0.34435 |
| 3372 | 3769.52192 | 9.61765  | 8365.39502  | 511.88283 | 0.55736  | 0.05508 | 522.38291 | 0.57807 |
| 3373 | 4667.81327 | 16.50711 | 16607.95314 | 413.15495 | 5.68311  | 0.09830 | 564.05176 | 0.44379 |
| 3374 | 3384.77126 | 18.24294 | 19329.69899 | 355.32450 | 0.73788  | 0.08528 | 267.77804 | 0.70171 |
| 3375 | 3741.62949 | 11.73087 | 7573.25775  | 608.28582 | 1.95715  | 0.02486 | 564.71923 | 0.54884 |
| 3376 | 4616.43520 | 18.62570 | 8325.30402  | 375.48574 | 4.24028  | 0.03090 | 475.42279 | 0.36023 |
| 3377 | 4374.39743 | 20.37305 | 9974.56553  | 564.87545 | 2.31787  | 0.03919 | 640.33360 | 0.43764 |
| 3378 | 4367.33202 | 18.89437 | 9561.79700  | 503.99530 | 2.62223  | 0.04467 | 562.99775 | 0.37692 |
| 3379 | 4823.27917 | 20.85310 | 7780.72090  | 448.48458 | 3.96928  | 0.04620 | 550.95781 | 0.41969 |
| 3380 | 4972.89568 | 8.58063  | 9206.69855  | 225.86026 | 0.13818  | 0.00358 | 327.78762 | 0.09838 |
| 3381 | 2923.16550 | 16.76255 | 14660.88060 | 417.01629 | 3.33635  | 0.24821 | 346.79828 | 0.72458 |
| 3382 | 4851.39854 | 13.64145 | 11978.02446 | 522.21668 | 1.31598  | 0.03680 | 675.94257 | 0.43694 |
| 3383 | 4675.59497 | 18.86473 | 12285.62628 | 333.83472 | 5.79064  | 0.04421 | 391.86877 | 0.37753 |
| 3384 | 4885.76823 | 9.31558  | 12446.32141 | 399.08939 | 1.53124  | 0.01591 | 585.65635 | 0.28111 |
| 3385 | 3504.70363 | 9.33710  | 7996.16206  | 424.87997 | -0.07558 | 0.03638 | 380.78075 | 0.48043 |
| 3386 | 5024.67437 | 18.12389 | 10121.70619 | 341.46933 | 2.35587  | 0.01508 | 486.42637 | 0.25875 |
| 3387 | 4536.76093 | 20.23756 | 24739.90840 | 349.27342 | 6.02696  | 0.08718 | 440.95330 | 0.36073 |
| 3388 | 4975.44960 | 10.30281 | 8714.98778  | 254.98948 | 2.51298  | 0.00475 | 374.46438 | 0.12350 |
| 3389 | 4270.89489 | 23.22610 | 13441.75537 | 520.78418 | 4.76974  | 0.00957 | 610.41053 | 0.12681 |
| 3390 | 4774.30491 | 10.20638 | 11813.22217 | 521.01249 | -1.31990 | 0.00785 | 704.08209 | 0.12141 |
| 3391 | 4969.13835 | 9.90980  | 8895.74535  | 451.83533 | 1.77409  | 0.00884 | 635.90394 | 0.14602 |
| 3392 | 4553.44783 | 17.76976 | 8338.20835  | 507.88632 | 2.71918  | 0.02737 | 667.00986 | 0.30962 |
| 3393 | 2789.52241 | 14.56308 | 13641.69082 | 447.98551 | 5.20963  | 0.25257 | 416.07576 | 0.72019 |
| 3394 | 3142.39635 | 17.18040 | 9510.79757  | 515.85878 | 3.60155  | 0.15636 | 440.46635 | 0.66128 |
| 3395 | 4967.44384 | 9.96823  | 8628.33190  | 269.05170 | 1.33725  | 0.00443 | 400.06046 | 0.19367 |
| 3396 | 4425.61235 | 11.53081 | 8415.48291  | 596.31777 | -1.49656 | 0.01233 | 724.59101 | 0.20028 |
| 3397 | 4576.12444 | 7.78133  | 8840.08460  | 278.24491 | -3.40053 | 0.00544 | 367.43148 | 0.10239 |
| 3398 | 4844.19315 | 12.69931 | 15143.30512 | 426.23207 | 3.43399  | 0.02525 | 591.89271 | 0.31495 |
| 3399 | 3673.53454 | 21.38169 | 12773.70271 | 101.41194 | 3.24482  | 0.01320 | 58.93941  | 0.80628 |
| 3400 | 3168.87670 | 16.78115 | 9612.17999  | 473.39891 | 3.44156  | 0.23734 | 386.66726 | 0.62524 |
| 3401 | 4769.38433 | 8.14280  | 9538.26840  | 309.69680 | -1.82254 | 0.00278 | 447.44324 | 0.06371 |
| 3402 | 4570.69430 | 20.67336 | 16974.81689 | 402.99772 | 6.11399  | 0.09478 | 497.61598 | 0.49537 |

|      |            |          |             |           |          |         |           |         |
|------|------------|----------|-------------|-----------|----------|---------|-----------|---------|
| 3403 | 4606.66939 | 18.88009 | 8425.02436  | 484.57365 | 3.88858  | 0.03780 | 637.49821 | 0.29535 |
| 3404 | 3216.56483 | 16.52559 | 12179.77773 | 380.95897 | 2.37737  | 0.08530 | 314.25957 | 0.80377 |
| 3405 | 4441.33090 | 21.72841 | 7909.66287  | 428.76954 | 1.75309  | 0.03009 | 532.23730 | 0.30886 |
| 3406 | 4879.05370 | 7.74311  | 9993.31165  | 296.68558 | -1.03868 | 0.00823 | 371.89402 | 0.25293 |
| 3407 | 4265.81429 | 16.19170 | 7767.71698  | 742.36038 | 1.66653  | 0.05255 | 772.82089 | 0.50219 |
| 3408 | 4425.77756 | 11.52502 | 8402.35863  | 655.82052 | -1.47452 | 0.01204 | 797.29115 | 0.23582 |
| 3409 | 4713.29745 | 15.84838 | 11379.61155 | 288.76206 | 5.47976  | 0.05465 | 353.03045 | 0.37567 |
| 3410 | 4265.01172 | 14.46127 | 14857.39092 | 93.31536  | -1.63050 | 0.00186 | 86.16872  | 1.02797 |
| 3411 | 3911.75166 | 12.94925 | 12043.65120 | 489.31798 | 1.44723  | 0.03781 | 568.38223 | 0.43673 |
| 3412 | 3610.86548 | 13.24489 | 20582.74725 | 223.87942 | 1.53604  | 0.01637 | 239.27004 | 0.26792 |
| 3413 | 3551.89592 | 16.83560 | 17598.70157 | 433.33208 | 0.77576  | 0.15066 | 397.90241 | 0.70143 |
| 3414 | 4540.41698 | 20.29327 | 24867.72194 | 417.49172 | 5.97787  | 0.09782 | 545.94392 | 0.34844 |
| 3415 | 4086.00696 | 20.23492 | 14873.70408 | 103.97434 | 3.43804  | 0.01338 | 64.24539  | 0.68669 |
| 3416 | 3539.55805 | 23.37846 | 9170.18955  | 918.22900 | 8.69596  | 0.06304 | 689.61248 | 1.28208 |
| 3417 | 4568.68194 | 20.65783 | 17249.39923 | 584.48002 | 5.09373  | 0.09736 | 749.03403 | 0.49236 |
| 3418 | 4196.43141 | 23.79458 | 8470.32749  | 671.62746 | 2.46126  | 0.05339 | 710.61429 | 0.59718 |
| 3419 | 4898.97917 | 16.86879 | 8797.88277  | 499.57892 | 3.45265  | 0.05358 | 656.42015 | 0.42683 |
| 3420 | 5020.37137 | 13.78617 | 8448.46141  | 318.03059 | 1.89031  | 0.01558 | 461.51117 | 0.18262 |
| 3421 | 2523.80283 | 26.13411 | 10896.57956 | 731.45714 | 8.66865  | 0.18920 | 456.67542 | 1.03158 |
| 3422 | 4843.57092 | 12.55916 | 12835.48123 | 364.84298 | 3.93913  | 0.02484 | 508.18072 | 0.33084 |
| 3423 | 2448.35098 | 13.80191 | 3847.99400  | 353.30922 | 6.03246  | 0.24203 | 390.76085 | 0.69315 |
| 3424 | 4440.67692 | 21.74436 | 7587.61868  | 587.98833 | 2.69651  | 0.03063 | 740.54763 | 0.30874 |
| 3425 | 4367.33374 | 18.88704 | 9568.00340  | 488.35612 | 2.79815  | 0.04384 | 544.11662 | 0.34816 |
| 3426 | 3118.70376 | 18.11886 | 10294.35916 | 464.75347 | 3.17756  | 0.17244 | 402.11025 | 0.79690 |
| 3427 | 4704.26130 | 19.16031 | 9952.63649  | 609.22001 | 0.79181  | 0.04216 | 779.50932 | 0.29971 |
| 3428 | 3835.63439 | 23.93676 | 7110.44446  | 633.77618 | 7.87119  | 0.07338 | 634.40680 | 0.35505 |
| 3429 | 3893.35855 | 13.37582 | 11285.01598 | 366.01056 | -1.11919 | 0.03154 | 384.16795 | 0.44410 |
| 3430 | 5011.94479 | 6.80771  | 9326.29865  | 246.01576 | -2.53726 | 0.00118 | 373.22684 | 0.03324 |
| 3431 | 3532.51645 | 15.27412 | 11886.84943 | 390.15401 | 1.91770  | 0.07017 | 323.66751 | 0.52318 |
| 3432 | 4150.95159 | 12.79874 | 12832.85211 | 262.75148 | -1.05121 | 0.00531 | 343.81312 | 0.11676 |
| 3433 | 4449.64542 | 20.37251 | 11005.71775 | 593.20820 | 4.13931  | 0.01741 | 701.80945 | 0.26695 |
| 3434 | 4201.39171 | 24.76872 | 8170.42868  | 841.49167 | 2.81358  | 0.02705 | 884.41612 | 0.42906 |
| 3435 | 4978.06562 | 9.90940  | 8921.70721  | 451.58736 | 0.75873  | 0.00610 | 634.44531 | 0.15305 |
| 3436 | 3756.96721 | 12.49187 | 6503.75286  | 336.66096 | -2.09091 | 0.01343 | 334.28275 | 0.41390 |
| 3437 | 4650.70471 | 22.41083 | 9724.19944  | 729.34374 | 2.42587  | 0.03331 | 919.38322 | 0.43225 |
| 3438 | 4604.86486 | 18.84360 | 7946.26210  | 375.76770 | 4.92091  | 0.03545 | 483.01189 | 0.26956 |
| 3439 | 4606.47236 | 22.29969 | 8637.78434  | 554.91281 | 2.58597  | 0.05932 | 672.56032 | 0.35333 |
| 3440 | 4522.62777 | 19.93544 | 7352.93592  | 556.76067 | 1.55396  | 0.04829 | 679.23984 | 0.42905 |
| 3441 | 3848.89642 | 24.37884 | 6299.05706  | 970.61168 | 3.71029  | 0.01734 | 926.34177 | 0.80361 |
| 3442 | 4850.88569 | 13.64697 | 11981.29515 | 530.66779 | 1.52078  | 0.03823 | 682.56985 | 0.46806 |
| 3443 | 3673.00988 | 14.11430 | 10021.55417 | 377.95089 | 0.74154  | 0.05968 | 356.68034 | 0.51985 |
| 3444 | 4497.63016 | 21.26719 | 8789.73511  | 523.47253 | 5.93785  | 0.10030 | 591.01733 | 0.60162 |
| 3445 | 4847.00502 | 13.30188 | 11074.27076 | 390.51598 | 2.02240  | 0.02250 | 585.76991 | 0.28332 |
| 3446 | 4878.68763 | 16.87194 | 8592.34468  | 441.53312 | 3.09964  | 0.05387 | 584.11656 | 0.41441 |
| 3447 | 4003.90783 | 9.87802  | 9280.82367  | 357.79805 | -1.62016 | 0.00659 | 466.37072 | 0.18607 |
| 3448 | 4713.44562 | 15.86248 | 11394.61878 | 554.94794 | 4.08491  | 0.05670 | 749.48160 | 0.36366 |
| 3449 | 4794.39780 | 10.38027 | 11080.80919 | 579.29953 | 2.51327  | 0.03992 | 712.81262 | 0.41073 |
| 3450 | 4575.71085 | 18.04689 | 8244.87747  | 504.60978 | 3.01862  | 0.03026 | 661.98801 | 0.24814 |
| 3451 | 5008.90445 | 10.08954 | 9264.29912  | 290.86094 | 1.01056  | 0.00501 | 434.55313 | 0.14601 |
| 3452 | 4004.06183 | 9.93356  | 9310.41843  | 355.64904 | -2.01466 | 0.01007 | 457.15107 | 0.16550 |
| 3453 | 3135.99423 | 13.03744 | 8682.03979  | 466.99794 | 3.58964  | 0.30272 | 359.62096 | 0.74597 |
| 3454 | 3859.15810 | 24.40150 | 6393.31760  | 796.19761 | 3.75818  | 0.02257 | 761.28231 | 0.77398 |
| 3455 | 4669.91237 | 16.62891 | 18040.45076 | 269.52952 | 4.98397  | 0.08731 | 349.03758 | 0.48601 |
| 3456 | 4885.69856 | 7.82841  | 10160.65724 | 251.92360 | -0.46311 | 0.00829 | 297.58560 | 0.23314 |
| 3457 | 4643.27734 | 20.09319 | 9496.12687  | 367.51365 | 3.94558  | 0.04355 | 504.53281 | 0.32364 |
| 3458 | 3766.16924 | 11.91197 | 9263.49613  | 585.41218 | 0.81809  | 0.03106 | 588.08585 | 0.49646 |
| 3459 | 4423.27934 | 11.47460 | 8366.86550  | 681.90122 | -0.98555 | 0.01331 | 843.42816 | 0.16604 |
| 3460 | 3975.53943 | 22.96054 | 7882.64728  | 826.43909 | 3.00482  | 0.04303 | 888.14361 | 0.52327 |
| 3461 | 4481.41724 | 15.08678 | 23524.25367 | 72.56053  | -0.56885 | 0.00026 | 44.03246  | 0.44063 |
| 3462 | 4890.14027 | 9.34298  | 10045.90236 | 542.76570 | -1.50614 | 0.02205 | 710.16155 | 0.42800 |
| 3463 | 4968.35645 | 9.88145  | 8845.57143  | 307.08493 | 1.34119  | 0.00701 | 430.64162 | 0.14403 |
| 3464 | 3858.72329 | 24.39934 | 6383.25354  | 965.64704 | 2.26606  | 0.01956 | 913.69289 | 0.51951 |
| 3465 | 4887.22695 | 19.83348 | 11140.88002 | 352.66756 | 3.19862  | 0.05888 | 471.99699 | 0.39252 |
| 3466 | 4806.01254 | 16.94532 | 9968.20306  | 612.18127 | -0.27858 | 0.03066 | 803.82760 | 0.31538 |
| 3467 | 4973.57902 | 8.60393  | 8947.13801  | 313.84936 | 0.65391  | 0.00410 | 468.92731 | 0.09597 |
| 3468 | 2533.36422 | 26.31244 | 11242.12299 | 572.14479 | 8.28153  | 0.17315 | 302.20013 | 1.37314 |
| 3469 | 4337.92408 | 19.41792 | 6379.41310  | 623.88365 | 1.14669  | 0.04585 | 711.67243 | 0.52037 |
| 3470 | 3131.08254 | 15.60084 | 6669.57641  | 306.29677 | 1.93901  | 0.01400 | 256.42580 | 0.22439 |
| 3471 | 4431.59776 | 15.51926 | 6376.25273  | 655.10491 | 2.76298  | 0.02809 | 755.47828 | 0.35832 |
| 3472 | 4921.71326 | 10.89758 | 8907.68389  | 199.80777 | 0.57687  | 0.00473 | 295.10506 | 0.14994 |
| 3473 | 4674.28524 | 18.85286 | 12292.39110 | 538.18386 | 2.91018  | 0.04659 | 685.67669 | 0.37702 |

|      |            |          |             |           |          |         |           |         |
|------|------------|----------|-------------|-----------|----------|---------|-----------|---------|
| 3474 | 4769.05801 | 8.13348  | 9539.92241  | 278.20052 | -2.52980 | 0.00299 | 377.56683 | 0.08313 |
| 3475 | 4894.13867 | 9.47127  | 10016.26711 | 497.49657 | 0.16333  | 0.02377 | 633.20997 | 0.39439 |
| 3476 | 4759.05010 | 8.22905  | 9959.12921  | 239.44615 | -3.92999 | 0.00286 | 315.21355 | 0.10620 |
| 3477 | 3837.60917 | 23.93830 | 7104.71959  | 874.52547 | 7.32862  | 0.07187 | 909.77233 | 0.41156 |
| 3478 | 4431.58111 | 14.75066 | 6183.23746  | 629.97625 | 3.61475  | 0.02424 | 682.01694 | 0.33852 |
| 3479 | 4803.22678 | 15.95376 | 7161.70609  | 452.47127 | 5.68244  | 0.01565 | 664.96443 | 0.18751 |
| 3480 | 4547.98681 | 16.03212 | 11275.27412 | 281.75722 | 5.38901  | 0.07557 | 381.32335 | 0.38534 |
| 3481 | 4044.02139 | 9.09473  | 11138.92900 | 285.50416 | -0.90798 | 0.00859 | 383.71938 | 0.15023 |
| 3482 | 4475.91746 | 22.79804 | 7112.68842  | 503.59273 | 4.90719  | 0.15588 | 582.80897 | 0.63848 |
| 3483 | 4525.45255 | 20.94489 | 15223.68669 | 639.11141 | 4.46451  | 0.01308 | 786.68790 | 0.25316 |
| 3484 | 4293.79440 | 15.03898 | 12163.80472 | 448.78664 | -2.40460 | 0.01778 | 531.98985 | 0.37757 |
| 3485 | 3181.45400 | 16.49002 | 7075.25018  | 423.16614 | 2.46577  | 0.12151 | 303.27481 | 0.68111 |
| 3486 | 4504.36541 | 16.54077 | 9005.07856  | 462.82692 | -1.44545 | 0.02894 | 536.73382 | 0.43808 |
| 3487 | 4715.86913 | 17.89546 | 15935.94377 | 333.01778 | 3.24126  | 0.02368 | 439.62453 | 0.21976 |
| 3488 | 4380.77483 | 18.74736 | 8620.57358  | 645.32122 | 2.46129  | 0.03654 | 709.17025 | 0.36814 |
| 3489 | 3997.40326 | 9.91139  | 9284.62299  | 313.09331 | -0.42697 | 0.01354 | 371.39995 | 0.24954 |
| 3490 | 3132.49617 | 15.90256 | 6787.37502  | 299.00872 | 0.36854  | 0.01153 | 236.40411 | 0.29271 |
| 3491 | 4888.44259 | 19.85712 | 11148.56045 | 339.54213 | 3.83670  | 0.05418 | 466.60224 | 0.39089 |
| 3492 | 4712.31788 | 15.82738 | 11375.81369 | 379.24781 | 4.86448  | 0.05290 | 493.99496 | 0.35319 |
| 3493 | 4979.68057 | 17.64285 | 8070.80145  | 768.89406 | 1.10809  | 0.01936 | 988.03875 | 0.30776 |
| 3494 | 4291.35705 | 15.18820 | 12183.53150 | 527.36575 | 0.15447  | 0.02403 | 606.38286 | 0.25126 |
| 3495 | 4889.51236 | 19.88133 | 11154.79909 | 479.08881 | 2.99158  | 0.06490 | 653.67704 | 0.38561 |
| 3496 | 4748.58745 | 21.54871 | 19521.89322 | 518.62498 | 4.91590  | 0.03440 | 662.25315 | 0.37102 |
| 3497 | 3832.14685 | 15.76637 | 8631.67266  | 703.02861 | 1.66866  | 0.03426 | 706.47088 | 0.52235 |
| 3498 | 4774.33815 | 10.16609 | 11788.15646 | 541.53683 | 0.85598  | 0.01466 | 704.21492 | 0.13583 |
| 3499 | 4281.97882 | 14.24655 | 6824.50610  | 552.34200 | -1.16119 | 0.02175 | 649.47648 | 0.44735 |
| 3500 | 3735.74880 | 11.60116 | 8713.43778  | 552.79207 | 1.10830  | 0.02984 | 551.95994 | 0.60453 |
| 3501 | 4349.74760 | 18.84360 | 7890.65343  | 455.50233 | 6.29944  | 0.10662 | 545.07290 | 0.48682 |
| 3502 | 4039.97331 | 25.74693 | 8861.49711  | 756.38083 | 2.32162  | 0.01545 | 755.70644 | 0.44073 |
| 3503 | 4820.89196 | 20.94664 | 7793.14188  | 688.94107 | 3.78702  | 0.04406 | 843.03145 | 0.40475 |
| 3504 | 4847.32013 | 13.30252 | 11079.56688 | 316.64955 | 2.40155  | 0.02139 | 471.51288 | 0.29015 |
| 3505 | 4973.69244 | 6.90229  | 8837.50834  | 262.65549 | -5.00188 | 0.00025 | 375.50456 | 0.03566 |
| 3506 | 4834.39045 | 14.40878 | 11007.29692 | 401.65317 | 3.61321  | 0.02582 | 612.46541 | 0.23918 |
| 3507 | 4335.14829 | 17.16103 | 8157.38461  | 544.09664 | 2.42677  | 0.04428 | 582.01412 | 0.39345 |
| 3508 | 4972.63121 | 8.58031  | 9518.30139  | 244.75646 | 0.10712  | 0.00307 | 354.08964 | 0.12744 |
| 3509 | 4639.08554 | 15.42060 | 10121.82021 | 355.11418 | 3.79791  | 0.09865 | 493.85545 | 0.42660 |
| 3510 | 2517.96410 | 26.30437 | 11473.33178 | 642.76063 | 8.35864  | 0.18181 | 380.18415 | 1.36034 |
| 3511 | 4941.24583 | 13.04329 | 9343.67265  | 315.76226 | 1.63119  | 0.00932 | 468.49916 | 0.17067 |
| 3512 | 2895.20750 | 16.49246 | 14712.06339 | 342.58348 | 4.88357  | 0.18001 | 258.62177 | 0.66231 |
| 3513 | 5091.73032 | 13.32138 | 12497.26320 | 71.26425  | -2.53188 | 0.00100 | 60.16650  | 0.40199 |
| 3514 | 4762.44128 | 14.79212 | 10440.04932 | 442.79098 | 4.42279  | 0.02399 | 641.33301 | 0.35214 |
| 3515 | 3315.15092 | 14.64364 | 11561.18144 | 335.77171 | 1.26602  | 0.05764 | 313.88602 | 0.60682 |
| 3516 | 3137.11505 | 16.79821 | 9546.65585  | 597.13166 | 2.24523  | 0.18896 | 545.98825 | 0.67643 |
| 3517 | 3709.48574 | 24.58843 | 6221.55944  | 739.58774 | 3.68835  | 0.05018 | 684.66765 | 0.48402 |
| 3518 | 4642.42132 | 20.78465 | 9181.98806  | 419.86292 | 4.97112  | 0.06532 | 510.88596 | 0.49767 |
| 3519 | 4893.69424 | 12.76269 | 7466.76745  | 334.95117 | 3.29576  | 0.03763 | 440.09032 | 0.31383 |
| 3520 | 4667.95330 | 10.79888 | 16333.04266 | 128.48067 | 0.95894  | 0.00911 | 145.20602 | 0.41466 |
| 3521 | 4281.48370 | 14.22071 | 6835.73320  | 643.03220 | -1.38240 | 0.02493 | 728.34323 | 0.25313 |
| 3522 | 4571.30871 | 20.67590 | 17002.38222 | 475.26039 | 4.75060  | 0.09313 | 596.59880 | 0.48147 |
| 3523 | 3540.00939 | 9.40043  | 7454.12079  | 660.03651 | 2.17208  | 0.04151 | 635.66038 | 0.66296 |
| 3524 | 4820.37444 | 22.38743 | 11779.50969 | 587.80357 | 3.85910  | 0.01390 | 780.26188 | 0.32102 |
| 3525 | 4647.87911 | 20.86122 | 9228.64926  | 591.04912 | 4.37502  | 0.07735 | 714.06339 | 0.49917 |
| 3526 | 4240.74316 | 19.24753 | 7241.88704  | 610.29538 | 3.26818  | 0.04649 | 663.65290 | 0.44549 |
| 3527 | 3934.49929 | 18.64649 | 6894.52373  | 645.93975 | 7.11856  | 0.05671 | 535.29873 | 0.55722 |
| 3528 | 4492.00299 | 20.51685 | 16043.11540 | 734.72794 | 2.95159  | 0.01262 | 867.92381 | 0.43053 |
| 3529 | 5082.73146 | 13.27464 | 10115.10975 | 91.75112  | -0.80393 | 0.00109 | 98.69604  | 0.38932 |
| 3530 | 4504.86252 | 21.00456 | 9941.86641  | 541.40908 | 5.11554  | 0.11157 | 685.76072 | 0.52261 |
| 3531 | 4708.44008 | 15.77085 | 11410.91090 | 403.72086 | 4.31868  | 0.04838 | 526.57998 | 0.38071 |
| 3532 | 3613.37558 | 17.66534 | 7331.37448  | 389.07915 | -0.13100 | 0.05466 | 356.54186 | 0.85901 |
| 3533 | 4293.81647 | 15.02808 | 12169.50127 | 495.67811 | -3.17580 | 0.01804 | 594.43991 | 0.38463 |
| 3534 | 4493.30948 | 12.55000 | 9301.82592  | 537.66289 | -0.21026 | 0.02508 | 658.68511 | 0.25617 |
| 3535 | 3981.77743 | 22.95856 | 7919.13364  | 693.25848 | 3.23226  | 0.04165 | 716.66014 | 0.49806 |
| 3536 | 3217.27586 | 16.53218 | 12204.97491 | 387.93461 | 2.52517  | 0.08519 | 312.55480 | 0.73925 |
| 3537 | 3558.06166 | 16.86247 | 17771.74546 | 289.02393 | 0.40498  | 0.14731 | 219.81779 | 0.65835 |
| 3538 | 4057.20003 | 9.07190  | 11665.95750 | 247.09206 | -1.55495 | 0.00543 | 351.30778 | 0.11044 |
| 3539 | 4819.24465 | 22.39119 | 11762.30388 | 564.62968 | 3.22219  | 0.01612 | 752.15054 | 0.28729 |
| 3540 | 4463.49863 | 19.61360 | 5662.53939  | 584.42139 | 3.18468  | 0.03105 | 671.81401 | 0.42144 |
| 3541 | 4763.13834 | 14.79706 | 11465.02386 | 343.04527 | 3.91081  | 0.02441 | 492.75627 | 0.35898 |
| 3542 | 4758.39083 | 14.71268 | 9486.62591  | 447.05862 | 4.54317  | 0.02741 | 648.19771 | 0.33918 |
| 3543 | 3735.65324 | 11.63980 | 8694.38434  | 475.33619 | 1.07539  | 0.03257 | 424.48987 | 0.61867 |
| 3544 | 2904.08812 | 16.54107 | 14823.26183 | 402.64808 | 4.53845  | 0.20138 | 348.78619 | 0.70330 |

|      |            |          |             |           |          |         |           |         |
|------|------------|----------|-------------|-----------|----------|---------|-----------|---------|
| 3545 | 3510.81119 | 16.65601 | 16709.09175 | 464.44987 | 1.23124  | 0.15495 | 425.84713 | 0.78872 |
| 3546 | 2937.28695 | 26.32696 | 12753.61440 | 564.84902 | 6.05059  | 0.11216 | 335.66922 | 1.62288 |
| 3547 | 4383.11758 | 15.65077 | 10459.36830 | 42.85866  | 1.69601  | 0.00839 | 6.57247   | 1.08398 |
| 3548 | 3703.36163 | 7.83326  | 6094.41066  | 333.98627 | -2.23006 | 0.02146 | 325.55195 | 0.51479 |
| 3549 | 4281.74193 | 14.23887 | 6831.89186  | 630.31684 | -0.83829 | 0.02576 | 727.27280 | 0.39175 |
| 3550 | 4550.31917 | 16.04285 | 11320.64647 | 406.84846 | 4.68154  | 0.06922 | 570.44770 | 0.39514 |
| 3551 | 4682.60256 | 18.36585 | 16745.55779 | 430.23003 | 3.78263  | 0.03045 | 581.89281 | 0.17545 |
| 3552 | 3282.18841 | 18.65170 | 18814.69945 | 367.27066 | 2.10331  | 0.21943 | 261.85164 | 0.90395 |
| 3553 | 4797.14891 | 16.81371 | 9906.23711  | 684.06782 | -0.19178 | 0.03547 | 903.06602 | 0.41293 |
| 3554 | 4941.81333 | 13.06269 | 9397.86870  | 437.60034 | 2.38639  | 0.01002 | 657.02236 | 0.14569 |
| 3555 | 3858.08131 | 24.40655 | 6384.89358  | 888.84902 | 2.87546  | 0.01808 | 844.95709 | 0.54948 |
| 3556 | 4848.53131 | 15.82438 | 8857.79515  | 409.75738 | 2.81003  | 0.02756 | 610.20212 | 0.26641 |
| 3557 | 4319.53579 | 14.75873 | 13613.55355 | 58.56816  | 0.54814  | 0.00366 | 16.84057  | 1.00818 |
| 3558 | 3135.60006 | 15.91007 | 6725.51245  | 278.93284 | 1.69422  | 0.01483 | 223.84673 | 0.28679 |
| 3559 | 3599.00010 | 13.03779 | 24902.55013 | 279.96735 | 1.09317  | 0.01666 | 325.23311 | 0.30919 |
| 3560 | 4465.01368 | 20.98245 | 9434.28389  | 385.06090 | 1.71806  | 0.04624 | 487.67113 | 0.39097 |
| 3561 | 4851.68040 | 15.84332 | 8850.32075  | 315.40370 | 3.65381  | 0.02897 | 466.85118 | 0.25505 |
| 3562 | 3337.43157 | 24.26377 | 11583.32966 | 625.04139 | 4.40384  | 0.06741 | 524.95193 | 0.72450 |
| 3563 | 3766.20211 | 11.90642 | 9276.46369  | 594.93658 | 1.38769  | 0.03167 | 602.77326 | 0.66120 |
| 3564 | 2534.31717 | 14.69818 | 3381.97256  | 419.50553 | 5.69780  | 0.28821 | 480.70090 | 1.77514 |
| 3565 | 4247.08649 | 19.01338 | 7270.45214  | 407.99056 | 3.55700  | 0.04289 | 398.39558 | 0.45662 |
| 3566 | 4617.11801 | 21.71412 | 15580.69500 | 467.54958 | 5.34509  | 0.06316 | 549.38676 | 0.52602 |
| 3567 | 3833.58771 | 15.80609 | 8633.94346  | 711.63358 | 2.40617  | 0.03095 | 679.38113 | 0.55867 |
| 3568 | 4704.86875 | 13.62144 | 9946.89545  | 338.37889 | 4.16372  | 0.01997 | 401.05921 | 0.24366 |
| 3569 | 3238.90317 | 18.24477 | 18149.00119 | 461.51403 | 3.06033  | 0.20758 | 371.18687 | 1.16191 |
| 3570 | 4000.74564 | 17.03700 | 5766.71141  | 327.91169 | -2.80401 | 0.02680 | 346.83421 | 0.83331 |
| 3571 | 4606.58133 | 22.27550 | 8645.41215  | 469.84271 | 2.10606  | 0.03907 | 584.12861 | 0.39697 |
| 3572 | 4007.12520 | 13.41555 | 15853.26210 | 181.61465 | -0.83228 | 0.00448 | 198.09843 | 0.56526 |
| 3573 | 5009.03410 | 10.08873 | 9274.60770  | 265.46126 | 1.15307  | 0.00511 | 381.51043 | 0.14541 |
| 3574 | 4479.65988 | 9.33004  | 10754.56464 | 79.52555  | -3.86087 | 0.00173 | 77.72759  | 0.90025 |
| 3575 | 4438.47293 | 10.41487 | 10540.34342 | 77.89856  | -2.21067 | 0.00163 | 68.36755  | 1.03025 |
| 3576 | 5009.03483 | 10.08883 | 9282.21719  | 331.50532 | 0.90594  | 0.00524 | 491.24067 | 0.13992 |
| 3577 | 4338.24631 | 17.13807 | 8208.76501  | 632.33294 | 2.69229  | 0.03726 | 681.41692 | 0.35850 |
| 3578 | 3694.91658 | 14.20255 | 10433.72107 | 450.37306 | -0.63575 | 0.05314 | 443.31660 | 0.66063 |
| 3579 | 3133.30263 | 7.42193  | 5988.17072  | 601.56678 | 3.03140  | 0.26620 | 469.94001 | 0.71014 |
| 3580 | 3476.33057 | 13.90317 | 7307.62458  | 558.04701 | 1.50857  | 0.05637 | 483.00525 | 0.58151 |
| 3581 | 4970.52693 | 17.48773 | 8697.37712  | 677.29434 | 3.80381  | 0.02583 | 892.80228 | 0.31160 |
| 3582 | 4932.51818 | 7.62333  | 9905.38384  | 366.48599 | -3.95461 | 0.00024 | 551.80122 | 0.02924 |
| 3583 | 3472.95704 | 13.91288 | 7288.84824  | 399.39108 | 1.64065  | 0.06414 | 309.03024 | 0.56474 |
| 3584 | 4969.18415 | 17.23289 | 8730.55792  | 474.55184 | -0.08877 | 0.01860 | 626.58875 | 0.30270 |
| 3585 | 3548.19282 | 16.81164 | 17533.86005 | 418.84716 | 1.13549  | 0.14425 | 398.53140 | 0.66913 |
| 3586 | 3181.13606 | 24.97113 | 7847.36438  | 476.24608 | 4.39843  | 0.11724 | 252.72914 | 1.20470 |
| 3587 | 4568.62650 | 22.56678 | 12957.22348 | 655.23736 | 3.98654  | 0.02648 | 819.84216 | 0.39681 |
| 3588 | 4791.05402 | 10.25683 | 11227.72403 | 517.55363 | -1.08275 | 0.02659 | 664.25224 | 0.41291 |
| 3589 | 3678.67294 | 7.64756  | 5913.90511  | 507.90964 | -0.91169 | 0.02281 | 560.62889 | 0.52911 |
| 3590 | 4821.03231 | 20.94050 | 7793.64866  | 682.98896 | 2.72659  | 0.04146 | 836.30857 | 0.40775 |
| 3591 | 4829.09467 | 8.80497  | 9391.07214  | 104.25568 | 1.32897  | 0.00453 | 83.90621  | 0.66168 |
| 3592 | 4820.50775 | 22.40038 | 10514.99209 | 584.86855 | 2.20394  | 0.01603 | 798.93933 | 0.29088 |
| 3593 | 4919.02573 | 10.83122 | 8773.73339  | 130.12297 | 3.27586  | 0.00651 | 150.22570 | 0.08959 |
| 3594 | 4115.19096 | 12.51504 | 12286.63642 | 271.28030 | -2.19502 | 0.00599 | 339.68566 | 0.31842 |
| 3595 | 4616.10847 | 22.41936 | 8674.42051  | 573.32249 | 2.08092  | 0.04258 | 713.90865 | 0.40154 |
| 3596 | 4971.63381 | 8.56128  | 9418.91064  | 271.63171 | -1.39793 | 0.00285 | 399.18049 | 0.10849 |
| 3597 | 4344.06568 | 23.78452 | 10426.87570 | 837.31441 | 3.58708  | 0.03025 | 889.74542 | 0.55317 |
| 3598 | 3626.02882 | 17.35938 | 17120.86916 | 357.93825 | -0.84235 | 0.10278 | 299.34177 | 0.97045 |
| 3599 | 4573.58273 | 7.63708  | 8696.42359  | 330.72327 | -2.54099 | 0.00404 | 460.25668 | 0.07898 |
| 3600 | 4432.28255 | 14.63638 | 6177.33256  | 565.18476 | 4.24829  | 0.02857 | 590.08815 | 0.31562 |
| 3601 | 4411.05126 | 17.92362 | 7001.06185  | 580.66717 | 3.39375  | 0.03517 | 590.00743 | 0.46706 |
| 3602 | 4417.38072 | 17.82875 | 7200.94629  | 448.74132 | -0.08667 | 0.03248 | 515.09428 | 0.32275 |
| 3603 | 4762.36988 | 14.80788 | 10472.94086 | 375.01990 | 4.00680  | 0.02397 | 549.49797 | 0.33951 |
| 3604 | 4449.54800 | 19.78554 | 8012.43444  | 422.34401 | 5.88934  | 0.07971 | 484.54768 | 0.59293 |
| 3605 | 4875.73367 | 7.72670  | 9707.52625  | 476.27877 | 0.11401  | 0.01043 | 656.12087 | 0.22871 |
| 3606 | 4567.90779 | 22.52765 | 12958.04540 | 473.62538 | 5.42176  | 0.02713 | 564.67524 | 0.44083 |
| 3607 | 4489.26697 | 20.48316 | 16554.74330 | 760.99010 | 2.56892  | 0.01257 | 900.07395 | 0.26897 |
| 3608 | 4691.20892 | 13.51594 | 9681.09161  | 368.91585 | 2.39403  | 0.01960 | 437.90375 | 0.23749 |
| 3609 | 4758.71252 | 18.18259 | 10723.83301 | 468.56962 | 0.36931  | 0.03362 | 605.62786 | 0.41055 |
| 3610 | 5010.22596 | 10.11809 | 8320.44430  | 261.96371 | 3.06733  | 0.00645 | 377.07356 | 0.13356 |
| 3611 | 3628.35892 | 23.25322 | 5169.08603  | 604.37482 | 7.25079  | 0.07227 | 590.49071 | 0.47378 |
| 3612 | 4422.46078 | 16.98276 | 10267.42802 | 316.16020 | 4.37894  | 0.07022 | 398.10165 | 0.60272 |
| 3613 | 4790.80997 | 15.74781 | 7072.15538  | 475.87728 | 4.06961  | 0.01539 | 692.93622 | 0.21331 |
| 3614 | 3390.28543 | 17.98149 | 19463.13197 | 400.68819 | 1.05922  | 0.08247 | 303.52580 | 0.72051 |
| 3615 | 4921.06559 | 19.94863 | 11487.45832 | 518.87836 | 3.17092  | 0.05622 | 706.87892 | 0.39975 |

|      |            |          |             |           |          |         |           |         |
|------|------------|----------|-------------|-----------|----------|---------|-----------|---------|
| 3616 | 4453.71464 | 21.74686 | 7636.16717  | 502.84573 | 3.16579  | 0.03036 | 661.28165 | 0.30901 |
| 3617 | 4945.65002 | 13.15438 | 9385.80195  | 401.01676 | 1.52456  | 0.00963 | 605.37786 | 0.17743 |
| 3618 | 4969.64429 | 17.25401 | 7945.30251  | 583.98210 | 0.95100  | 0.01802 | 770.62196 | 0.31198 |
| 3619 | 4971.54491 | 10.99763 | 10239.68491 | 85.71584  | 0.04154  | 0.00280 | 71.16706  | 0.33488 |
| 3620 | 4884.21928 | 19.79860 | 11073.39132 | 484.35793 | 5.88901  | 0.07613 | 670.99001 | 0.35976 |
| 3621 | 4742.71031 | 21.83208 | 10210.77280 | 364.35900 | 4.48624  | 0.05965 | 438.95070 | 0.43116 |
| 3622 | 4928.89972 | 7.61293  | 9203.26230  | 250.87029 | -2.89286 | 0.00034 | 362.44459 | 0.02696 |
| 3623 | 4472.78782 | 21.00434 | 9275.05973  | 557.78692 | 3.22121  | 0.04754 | 721.10254 | 0.30545 |
| 3624 | 4351.61077 | 23.78554 | 10454.19410 | 932.00694 | 4.15597  | 0.03712 | 995.53561 | 0.54482 |
| 3625 | 4669.97223 | 16.61911 | 18060.36391 | 392.81007 | 4.20609  | 0.09188 | 537.25658 | 0.45260 |
| 3626 | 4572.64685 | 10.31097 | 9281.85657  | 509.92634 | 0.48011  | 0.03773 | 635.70404 | 0.30514 |
| 3627 | 4680.62463 | 21.50368 | 9187.31819  | 461.40268 | 2.37508  | 0.05862 | 556.28919 | 0.53249 |
| 3628 | 4713.22276 | 15.86359 | 11381.89419 | 565.73335 | 3.00033  | 0.05554 | 749.24384 | 0.38703 |
| 3629 | 4182.09026 | 13.32836 | 10231.05618 | 76.71977  | -2.12665 | 0.00347 | 60.02503  | 1.11299 |
| 3630 | 3396.12266 | 11.75774 | 7566.75190  | 443.32566 | 1.92201  | 0.08527 | 329.71344 | 0.70209 |
| 3631 | 4704.86090 | 11.10250 | 15917.75618 | 129.46077 | 3.65658  | 0.00593 | 158.40509 | 0.18911 |
| 3632 | 4575.05786 | 10.40254 | 9307.55360  | 488.76741 | -1.38953 | 0.02490 | 649.22749 | 0.20972 |
| 3633 | 4699.06383 | 18.29267 | 16559.53023 | 379.01320 | 4.57037  | 0.03372 | 500.81068 | 0.12687 |
| 3634 | 4240.25327 | 17.40098 | 7588.46903  | 595.86115 | 0.62901  | 0.02256 | 625.42256 | 0.48595 |
| 3635 | 4056.52431 | 9.20738  | 11869.62410 | 168.54468 | -0.84002 | 0.00584 | 199.26406 | 0.11533 |
| 3636 | 4762.39467 | 21.64301 | 19623.30069 | 638.77389 | 4.33825  | 0.03569 | 816.57877 | 0.34799 |
| 3637 | 4846.54448 | 13.59034 | 12180.32366 | 449.69404 | 1.61650  | 0.03470 | 568.72982 | 0.45870 |
| 3638 | 3106.61008 | 18.13069 | 10207.59361 | 413.47804 | 4.11759  | 0.17517 | 360.16623 | 0.79499 |
| 3639 | 4521.99713 | 19.91017 | 7359.53628  | 467.48323 | 2.24151  | 0.04880 | 556.75295 | 0.44600 |
| 3640 | 4897.06381 | 9.54826  | 10179.04828 | 553.08255 | -1.51825 | 0.02114 | 722.36202 | 0.32481 |
| 3641 | 3260.91125 | 18.31556 | 18415.93305 | 402.60496 | 2.84915  | 0.17648 | 302.62421 | 1.09687 |
| 3642 | 4899.25221 | 13.48730 | 8174.62755  | 497.83017 | 1.62181  | 0.01618 | 716.01412 | 0.22966 |
| 3643 | 3669.46920 | 14.07611 | 9922.04213  | 514.33116 | 2.58175  | 0.08215 | 499.92060 | 0.75053 |
| 3644 | 4456.67290 | 20.29733 | 10189.42695 | 702.79897 | 5.24232  | 0.02189 | 870.82094 | 0.27703 |
| 3645 | 3514.84869 | 9.33962  | 8217.84186  | 355.21486 | -0.51713 | 0.02794 | 264.38541 | 0.53763 |
| 3646 | 4976.56612 | 23.09388 | 10175.38860 | 604.37406 | 2.04120  | 0.04498 | 711.20807 | 0.79190 |
| 3647 | 2450.63142 | 13.83402 | 3945.27248  | 430.13552 | 5.74067  | 0.27731 | 511.23483 | 0.76914 |
| 3648 | 3693.75856 | 14.15975 | 10421.03418 | 434.36201 | -0.04046 | 0.05255 | 409.20951 | 0.68394 |
| 3649 | 3177.52470 | 15.84147 | 12231.64673 | 402.17658 | 4.09028  | 0.12088 | 299.00765 | 0.62114 |
| 3650 | 4636.65296 | 15.38833 | 10179.46747 | 392.23165 | 3.90138  | 0.08678 | 543.98404 | 0.44264 |
| 3651 | 4423.39239 | 11.43106 | 8405.09953  | 547.81830 | -3.00418 | 0.01113 | 677.53875 | 0.28759 |
| 3652 | 4578.91001 | 17.95436 | 8263.95664  | 471.31077 | 2.61423  | 0.02682 | 621.34372 | 0.31173 |
| 3653 | 3776.32220 | 12.11222 | 9410.16249  | 654.09316 | -0.39496 | 0.03030 | 659.20986 | 0.49694 |
| 3654 | 4223.04089 | 17.47628 | 18224.05421 | 70.26291  | 1.04272  | 0.01412 | 30.03163  | 1.05026 |
| 3655 | 3293.43102 | 17.27024 | 7429.74373  | 348.11055 | 0.86792  | 0.08669 | 249.56417 | 0.78573 |
| 3656 | 4491.42826 | 22.59538 | 7416.00931  | 523.53455 | 5.59191  | 0.13223 | 596.23783 | 0.75413 |
| 3657 | 4638.13565 | 15.39689 | 10184.16412 | 409.08130 | 4.60026  | 0.09966 | 574.09433 | 0.44463 |
| 3658 | 4415.93450 | 22.70628 | 8379.67421  | 659.85101 | 2.72930  | 0.01425 | 849.76494 | 0.30127 |
| 3659 | 4198.76464 | 21.01577 | 10517.15538 | 815.23372 | 2.56145  | 0.04107 | 812.06663 | 0.53893 |
| 3660 | 4784.78494 | 15.47060 | 7030.62496  | 319.36789 | 2.05227  | 0.01386 | 458.60202 | 0.21940 |
| 3661 | 2997.59291 | 24.79902 | 7263.71593  | 504.58802 | 5.35934  | 0.15492 | 289.43941 | 1.02684 |
| 3662 | 4038.34046 | 22.40314 | 8371.08314  | 66.17657  | 2.77245  | 0.00510 | 33.57735  | 1.88506 |
| 3663 | 4087.36399 | 18.95367 | 6730.84474  | 659.93625 | 2.76354  | 0.06472 | 678.05879 | 0.59736 |
| 3664 | 4413.91672 | 17.84645 | 7166.06323  | 590.90977 | 1.92703  | 0.04587 | 697.80590 | 0.41581 |
| 3665 | 5003.03032 | 7.78253  | 13757.69315 | 136.50727 | -0.47422 | 0.00204 | 184.79391 | 0.08354 |
| 3666 | 4901.89724 | 12.70195 | 7597.42344  | 423.74672 | 2.39138  | 0.03739 | 575.74992 | 0.30106 |
| 3667 | 3540.47516 | 9.40739  | 7236.72181  | 698.28819 | 2.54625  | 0.04197 | 668.76409 | 0.60839 |
| 3668 | 3262.05855 | 18.17248 | 9804.99602  | 406.78019 | 2.29759  | 0.12676 | 323.75616 | 0.88556 |
| 3669 | 4942.39795 | 13.07994 | 9403.18377  | 348.79960 | 3.66568  | 0.01077 | 525.51653 | 0.13868 |
| 3670 | 3533.81650 | 17.34267 | 7950.20759  | 375.28684 | 0.20880  | 0.05873 | 356.00808 | 0.57961 |
| 3671 | 4881.01252 | 19.77016 | 11060.50980 | 482.84526 | 3.40365  | 0.07452 | 653.23235 | 0.36193 |
| 3672 | 3505.99569 | 9.33616  | 8054.56192  | 467.47282 | 0.59727  | 0.03609 | 424.20378 | 0.44988 |
| 3673 | 4920.23452 | 13.82034 | 8016.21319  | 483.63177 | 5.16849  | 0.01868 | 708.53176 | 0.18482 |
| 3674 | 4374.10482 | 20.47426 | 9916.89626  | 580.42166 | 1.93919  | 0.04172 | 668.27074 | 0.46052 |
| 3675 | 4878.84049 | 7.75555  | 10064.58300 | 387.74411 | -1.58270 | 0.00863 | 514.91401 | 0.23540 |
| 3676 | 3287.25502 | 18.71032 | 18791.57697 | 414.31058 | 2.55446  | 0.20762 | 328.21924 | 0.96322 |
| 3677 | 4319.32395 | 21.86739 | 8587.26036  | 644.27262 | 2.24170  | 0.03516 | 700.42604 | 0.56249 |
| 3678 | 4750.31861 | 21.54713 | 20057.25308 | 688.07434 | 4.78160  | 0.03502 | 866.63525 | 0.37465 |
| 3679 | 3137.04763 | 16.79767 | 9538.70451  | 559.85458 | 2.92250  | 0.18421 | 502.22263 | 0.66340 |
| 3680 | 4433.44638 | 15.58187 | 6458.61476  | 504.97790 | 2.68913  | 0.02334 | 555.41624 | 0.41181 |
| 3681 | 3897.83052 | 11.22891 | 14384.51555 | 201.24680 | -2.37936 | 0.00271 | 248.20585 | 0.53237 |
| 3682 | 3723.51877 | 24.45770 | 7545.47554  | 67.58252  | 4.72219  | 0.00653 | 24.20249  | 1.74187 |
| 3683 | 4576.05006 | 10.21222 | 9304.15623  | 418.05267 | -2.95915 | 0.01935 | 517.83498 | 0.30780 |
| 3684 | 4513.68833 | 20.92297 | 11700.96094 | 719.15986 | 3.85573  | 0.01397 | 861.19043 | 0.22621 |
| 3685 | 4056.25198 | 25.70664 | 8935.68672  | 848.45399 | 2.45167  | 0.01283 | 860.60163 | 0.38933 |
| 3686 | 4425.78778 | 17.32394 | 10724.35405 | 744.46650 | 2.90843  | 0.03733 | 801.76447 | 0.36743 |



|      |            |          |             |            |          |         |            |         |
|------|------------|----------|-------------|------------|----------|---------|------------|---------|
| 3687 | 5008.90036 | 10.09134 | 9263.84956  | 314.03600  | 1.08000  | 0.00477 | 468.74760  | 0.15511 |
| 3688 | 4974.17254 | 8.61499  | 8961.73115  | 237.47631  | 1.89145  | 0.00426 | 335.95774  | 0.09708 |
| 3689 | 4576.12619 | 10.22078 | 9305.25955  | 398.92615  | -3.76862 | 0.01975 | 506.06559  | 0.36631 |
| 3690 | 3393.31790 | 21.63935 | 4518.15632  | 59.25327   | 4.16435  | 0.00441 | 11.31229   | 1.08015 |
| 3691 | 2953.79364 | 26.35346 | 12585.10455 | 462.59864  | 5.75972  | 0.11798 | 202.33150  | 1.67799 |
| 3692 | 3742.23868 | 11.74089 | 7563.62019  | 800.44647  | 2.22645  | 0.02170 | 742.57112  | 0.52833 |
| 3693 | 4850.56971 | 13.64168 | 11888.67346 | 570.01095  | 1.43981  | 0.03873 | 732.36920  | 0.48247 |
| 3694 | 4375.22779 | 20.35425 | 9999.68896  | 365.51837  | 2.38562  | 0.03790 | 364.92345  | 0.44163 |
| 3695 | 4576.17557 | 10.22615 | 9305.75473  | 377.26078  | -3.95185 | 0.02060 | 480.25507  | 0.18885 |
| 3696 | 4740.21553 | 21.75354 | 10188.55851 | 369.14475  | 4.71920  | 0.06553 | 430.15054  | 0.51018 |
| 3697 | 3847.73618 | 14.43039 | 19309.12211 | 157.85951  | -0.50178 | 0.00295 | 171.05750  | 0.51536 |
| 3698 | 3901.88482 | 24.71768 | 10039.05331 | 1142.26080 | 6.67507  | 0.01435 | 1093.23059 | 0.33809 |
| 3699 | 3270.48496 | 18.09462 | 9887.53891  | 482.82588  | 1.46889  | 0.13395 | 428.93920  | 0.87236 |
| 3700 | 3374.43386 | 20.28438 | 9690.11915  | 140.82147  | 3.75199  | 0.01098 | 112.74038  | 1.10177 |
| 3701 | 4604.95458 | 20.65304 | 21021.70499 | 390.04342  | 5.04597  | 0.07607 | 499.66150  | 0.48587 |
| 3702 | 4438.37845 | 17.23364 | 14606.27263 | 57.43971   | 1.93266  | 0.00923 | 15.34086   | 1.48441 |
| 3703 | 4292.35707 | 18.13422 | 6913.64681  | 552.27463  | 1.84659  | 0.04637 | 592.55589  | 0.52690 |
| 3704 | 4975.08495 | 10.27638 | 8738.80988  | 282.63006  | 1.53474  | 0.00445 | 427.72255  | 0.14697 |
| 3705 | 3931.31481 | 20.07652 | 9077.46905  | 823.11640  | 6.14955  | 0.06042 | 733.77752  | 0.69951 |
| 3706 | 2601.55646 | 26.37587 | 11409.33284 | 588.08786  | 7.62856  | 0.17183 | 233.05068  | 1.37228 |
| 3707 | 4046.41658 | 8.98194  | 12059.96397 | 251.29953  | -0.93343 | 0.00362 | 319.84003  | 0.20678 |
| 3708 | 4811.33073 | 22.29401 | 11772.30487 | 710.75431  | 2.04372  | 0.01717 | 933.29684  | 0.27568 |
| 3709 | 3854.83211 | 24.42313 | 6280.88057  | 739.21797  | 2.64412  | 0.02291 | 708.75727  | 0.81498 |
| 3710 | 4289.14916 | 17.66127 | 7518.90107  | 790.65367  | 3.22033  | 0.04820 | 827.75582  | 0.42956 |
| 3711 | 4968.13943 | 9.88011  | 8840.64445  | 506.89179  | 0.49344  | 0.00757 | 725.70549  | 0.16794 |
| 3712 | 5012.32419 | 9.99639  | 9469.42360  | 266.37170  | 0.65340  | 0.00468 | 390.03352  | 0.17174 |
| 3713 | 4795.63601 | 10.38892 | 11106.24851 | 613.96277  | 0.55744  | 0.02683 | 790.52962  | 0.42027 |
| 3714 | 4084.50178 | 18.97941 | 6710.81531  | 798.20943  | 3.73772  | 0.07598 | 795.24752  | 0.61147 |
| 3715 | 4575.43750 | 22.49663 | 12938.22742 | 555.02949  | 4.70991  | 0.03288 | 706.99875  | 0.34544 |
| 3716 | 4798.24860 | 22.28779 | 9899.16575  | 680.51338  | 4.03220  | 0.02211 | 880.20725  | 0.27040 |
| 3717 | 4841.41438 | 15.75218 | 10205.37971 | 477.70169  | 2.55767  | 0.02972 | 707.22723  | 0.25908 |
| 3718 | 4374.33746 | 20.44779 | 9929.04412  | 459.26379  | 2.74154  | 0.04158 | 490.10332  | 0.47401 |
| 3719 | 3756.33492 | 12.50289 | 6501.66246  | 342.13117  | -1.27691 | 0.01268 | 342.19803  | 0.41360 |
| 3720 | 5012.89330 | 10.00316 | 9152.90345  | 261.21544  | 1.27074  | 0.00450 | 381.10938  | 0.13679 |
| 3721 | 4784.58224 | 15.48032 | 6998.93538  | 346.99393  | 2.65618  | 0.01355 | 502.17345  | 0.20298 |
| 3722 | 4134.49950 | 19.97340 | 15161.05170 | 80.14680   | 2.97339  | 0.01036 | 38.48603   | 0.71712 |
| 3723 | 5069.22749 | 12.93479 | 12406.90772 | 97.27956   | -2.45804 | 0.00118 | 109.46980  | 0.36671 |
| 3724 | 4306.43156 | 16.51668 | 14843.58210 | 82.30180   | 0.62519  | 0.01189 | 58.02305   | 1.30405 |
| 3725 | 3159.31831 | 25.00509 | 7921.54706  | 504.08975  | 4.68440  | 0.11370 | 293.36499  | 1.19751 |
| 3726 | 4131.31246 | 12.41518 | 12010.87731 | 218.67466  | -1.38423 | 0.00519 | 257.95924  | 0.33701 |
| 3727 | 4666.92883 | 10.74649 | 16388.61183 | 121.70224  | 0.89796  | 0.00927 | 131.83688  | 0.49259 |
| 3728 | 4814.76078 | 22.39637 | 11613.13903 | 710.87324  | 2.64208  | 0.01519 | 942.53003  | 0.24485 |
| 3729 | 4241.58465 | 19.12470 | 7220.23590  | 585.11532  | 3.99349  | 0.04897 | 617.07605  | 0.50389 |
| 3730 | 4497.51247 | 21.26603 | 8788.33965  | 453.86494  | 4.12391  | 0.08591 | 494.94308  | 0.62227 |
| 3731 | 4487.06360 | 21.02659 | 9239.35810  | 555.18995  | 2.31575  | 0.04505 | 727.40652  | 0.37653 |
| 3732 | 3932.33471 | 20.03227 | 9533.75006  | 772.70154  | 6.01864  | 0.05385 | 624.83787  | 0.65958 |
| 3733 | 4504.56095 | 16.54722 | 8920.02183  | 500.00459  | -0.76002 | 0.02807 | 587.61990  | 0.42418 |
| 3734 | 4604.63865 | 20.65453 | 22365.73352 | 379.71734  | 6.05020  | 0.09912 | 482.51094  | 0.47943 |
| 3735 | 3732.69617 | 12.88638 | 13704.76728 | 153.78444  | -1.42155 | 0.00581 | 167.35183  | 0.24129 |
| 3736 | 4372.49137 | 20.43894 | 9932.20475  | 585.59284  | 3.23438  | 0.04154 | 644.06808  | 0.49391 |
| 3737 | 4887.46910 | 9.38555  | 12694.45158 | 410.40109  | 2.18890  | 0.01970 | 611.90043  | 0.26317 |
| 3738 | 3231.02594 | 16.50872 | 12345.53316 | 290.63934  | 2.48327  | 0.08424 | 183.81561  | 0.75655 |
| 3739 | 4944.42409 | 13.12699 | 9364.76999  | 363.45208  | 3.15819  | 0.01088 | 549.33767  | 0.14700 |
| 3740 | 3086.51417 | 19.57260 | 10603.67032 | 514.22886  | 3.89494  | 0.12606 | 370.43471  | 1.16243 |
| 3741 | 3216.41711 | 14.48759 | 10034.73396 | 275.61290  | 2.80086  | 0.09396 | 240.68255  | 0.35492 |
| 3742 | 5112.98668 | 10.98074 | 13865.03022 | 148.53575  | 1.17825  | 0.00298 | 197.69999  | 0.10968 |
| 3743 | 4945.61177 | 13.15575 | 9461.82625  | 401.11290  | 2.47868  | 0.01033 | 604.36188  | 0.20326 |
| 3744 | 3932.92899 | 17.42762 | 10853.36923 | 81.38369   | -0.56078 | 0.00424 | 52.03640   | 0.98504 |
| 3745 | 4564.65616 | 22.53830 | 12928.50917 | 458.50748  | 5.33104  | 0.02781 | 559.84584  | 0.40315 |
| 3746 | 4006.90419 | 9.40760  | 8933.95304  | 255.67220  | -2.85223 | 0.00619 | 287.53825  | 0.23048 |
| 3747 | 4665.25755 | 18.77446 | 12268.42046 | 594.68335  | 4.05030  | 0.04540 | 736.93271  | 0.34437 |
| 3748 | 4859.89075 | 13.81974 | 11583.17851 | 484.29867  | 3.25824  | 0.04622 | 596.01284  | 0.49578 |
| 3749 | 3375.75064 | 20.31583 | 10636.39046 | 185.67758  | 4.61817  | 0.01470 | 205.36651  | 0.91721 |
| 3750 | 3247.41572 | 17.14970 | 7117.41907  | 337.67833  | 1.67813  | 0.10812 | 243.09099  | 0.67961 |
| 3751 | 4805.78356 | 22.30935 | 11462.62589 | 622.10254  | 3.54044  | 0.01520 | 805.43112  | 0.27038 |
| 3752 | 4570.64727 | 17.92680 | 8313.74966  | 508.62689  | 2.39676  | 0.02627 | 675.47383  | 0.31378 |
| 3753 | 2982.89421 | 20.65428 | 8600.63011  | 508.70925  | 4.30977  | 0.21621 | 377.57103  | 1.24114 |
| 3754 | 4633.48469 | 7.63160  | 16794.87932 | 99.20382   | -3.08447 | 0.00001 | 105.25040  | 0.11584 |
| 3755 | 4342.30023 | 21.91425 | 8698.43576  | 811.97249  | 2.45668  | 0.04250 | 826.27549  | 0.53598 |
| 3756 | 5113.13154 | 10.98652 | 13865.68017 | 170.56947  | 1.08274  | 0.00301 | 245.18625  | 0.12353 |
| 3757 | 2904.22898 | 16.21919 | 14860.75611 | 351.24490  | 4.63422  | 0.20429 | 230.02950  | 0.58866 |

|      |            |          |             |           |          |         |           |         |
|------|------------|----------|-------------|-----------|----------|---------|-----------|---------|
| 3758 | 3574.79021 | 17.69700 | 7345.56281  | 412.26304 | 0.28116  | 0.09563 | 376.02695 | 0.81095 |
| 3759 | 3371.25975 | 20.36347 | 10489.67332 | 193.18258 | 4.11484  | 0.01979 | 201.25215 | 0.93612 |
| 3760 | 4968.89581 | 9.89910  | 8896.35618  | 190.99808 | 0.89023  | 0.00869 | 228.53547 | 0.14037 |
| 3761 | 4663.65611 | 7.46939  | 17876.85379 | 94.97716  | -4.40584 | 0.00002 | 101.92363 | 0.13103 |
| 3762 | 4606.58232 | 22.27815 | 8315.47136  | 465.16680 | 1.16244  | 0.04100 | 568.39803 | 0.42258 |
| 3763 | 3265.64043 | 18.49899 | 19012.52774 | 402.85195 | 2.26662  | 0.19701 | 354.02926 | 0.87467 |
| 3764 | 3778.25783 | 24.16876 | 10930.85068 | 811.07458 | 3.94927  | 0.04780 | 752.18408 | 0.77147 |
| 3765 | 4689.14717 | 13.58336 | 9913.78045  | 333.32132 | 3.03633  | 0.02270 | 385.74262 | 0.22825 |
| 3766 | 4168.53089 | 11.28423 | 14962.04526 | 153.66065 | -1.40108 | 0.00187 | 182.86341 | 1.01199 |
| 3767 | 4380.84353 | 18.87415 | 8605.40196  | 584.05494 | 2.65717  | 0.03940 | 614.34443 | 0.43342 |
| 3768 | 3218.33303 | 14.50431 | 10019.53794 | 369.66499 | 3.60119  | 0.07114 | 348.78575 | 0.44040 |
| 3769 | 3548.19282 | 16.81164 | 17533.86005 | 418.84716 | 1.13549  | 0.14425 | 398.53140 | 0.66913 |
| 3770 | 3691.81816 | 24.87994 | 13107.31741 | 92.60666  | 4.98071  | 0.00849 | 40.56927  | 1.08520 |
| 3771 | 4517.03468 | 20.92193 | 15133.18722 | 755.15713 | 3.18013  | 0.01447 | 946.57250 | 0.22686 |
| 3772 | 2861.99965 | 15.33951 | 15055.90341 | 433.12164 | 4.47427  | 0.23276 | 360.80378 | 0.71361 |
| 3773 | 3753.18184 | 24.47568 | 11290.65144 | 70.57172  | 4.66221  | 0.00631 | 26.43335  | 1.42834 |
| 3774 | 4789.70395 | 15.73469 | 7065.98680  | 461.51759 | 3.85854  | 0.01517 | 675.25354 | 0.21346 |
| 3775 | 4463.72713 | 11.99481 | 16124.16954 | 92.64477  | -2.59864 | 0.00025 | 89.76978  | 1.12349 |
| 3776 | 4819.22967 | 22.38459 | 10503.07389 | 673.93165 | 3.37812  | 0.01748 | 873.92493 | 0.28691 |
| 3777 | 3829.57266 | 23.83841 | 12117.14231 | 605.66085 | 6.70090  | 0.01911 | 637.97746 | 0.05564 |
| 3778 | 4888.44259 | 19.85712 | 11148.56045 | 339.54213 | 3.83670  | 0.05418 | 466.60224 | 0.39089 |
| 3779 | 4688.04049 | 21.36324 | 17495.02685 | 445.57079 | 5.47758  | 0.06745 | 552.96578 | 0.60079 |
| 3780 | 4943.05324 | 13.09349 | 9434.70566  | 343.96057 | 1.95548  | 0.00982 | 508.68082 | 0.15640 |
| 3781 | 4239.30592 | 24.68263 | 8279.57681  | 763.34483 | 1.85524  | 0.01965 | 848.44059 | 0.30433 |
| 3782 | 3766.87528 | 11.92183 | 9285.59825  | 731.64364 | 1.16384  | 0.02959 | 745.18024 | 0.49863 |
| 3783 | 4958.24326 | 6.65055  | 9531.43194  | 446.44687 | -2.73930 | 0.00677 | 636.41901 | 0.17089 |
| 3784 | 3860.03364 | 23.90294 | 12064.79829 | 615.43093 | 6.62148  | 0.01535 | 618.94676 | 0.06460 |
| 3785 | 4251.38033 | 18.96939 | 7141.93746  | 829.04120 | 2.80975  | 0.05379 | 886.55347 | 0.39845 |
| 3786 | 4957.78843 | 6.63492  | 10234.37254 | 394.27523 | -1.01988 | 0.00609 | 579.75845 | 0.20723 |
| 3787 | 4575.14978 | 7.67801  | 8880.87159  | 262.81817 | -2.71707 | 0.00367 | 367.94990 | 0.08549 |
| 3788 | 4847.17138 | 13.30790 | 10777.71971 | 414.80329 | 2.94685  | 0.02440 | 620.98244 | 0.29889 |
| 3789 | 4710.27663 | 19.22165 | 11495.17240 | 328.63606 | 4.05621  | 0.07929 | 420.90570 | 0.56792 |
| 3790 | 3576.14698 | 13.31108 | 5195.45571  | 694.98193 | 1.78319  | 0.04239 | 700.37575 | 0.54910 |
| 3791 | 3633.06599 | 22.19432 | 12181.68863 | 136.00694 | 3.91436  | 0.01514 | 105.25059 | 0.66889 |
| 3792 | 4574.91274 | 10.40555 | 9311.54249  | 467.94519 | -0.77097 | 0.02446 | 606.57962 | 0.21410 |
| 3793 | 3858.89913 | 11.89934 | 13329.59107 | 110.02325 | -0.29306 | 0.00398 | 83.24231  | 0.37774 |
| 3794 | 3753.05698 | 12.37403 | 6481.36724  | 377.46837 | -1.21596 | 0.01474 | 425.46823 | 0.41565 |
| 3795 | 5019.93138 | 13.79919 | 8421.27617  | 366.70513 | 1.76238  | 0.01634 | 542.80816 | 0.20315 |
| 3796 | 5260.64948 | 14.41616 | 9860.88996  | 46.70348  | -3.38564 | 0.00012 | 28.73835  | 1.04294 |
| 3797 | 3373.90053 | 20.90291 | 4647.21992  | 63.91824  | 4.43757  | 0.00574 | 14.37506  | 1.07428 |
| 3798 | 4398.14465 | 6.51459  | 7821.20102  | 503.72592 | -0.63936 | 0.00402 | 671.28900 | 0.07059 |
| 3799 | 4758.65754 | 8.26281  | 9795.27028  | 254.16929 | -4.15710 | 0.00288 | 341.98340 | 0.09550 |
| 3800 | 4266.77137 | 16.20426 | 7790.17341  | 596.96752 | 1.17808  | 0.04151 | 605.68092 | 0.49575 |
| 3801 | 3756.80758 | 12.50632 | 6501.58974  | 344.16697 | -1.67130 | 0.01466 | 376.92649 | 0.41359 |
| 3802 | 4247.23586 | 19.07731 | 7239.99908  | 505.94297 | 5.06663  | 0.05571 | 513.33064 | 0.40495 |
| 3803 | 3800.27966 | 23.70170 | 12057.14284 | 696.33530 | 6.56668  | 0.02044 | 707.57877 | 0.05217 |
| 3804 | 5044.93134 | 13.49106 | 8941.26970  | 371.89717 | 1.83618  | 0.01353 | 551.52874 | 0.19665 |
| 3805 | 4845.46902 | 12.73101 | 12982.96180 | 380.67642 | 3.36176  | 0.02497 | 540.72251 | 0.26739 |
| 3806 | 4505.99116 | 21.12638 | 9942.41249  | 350.38991 | 6.00889  | 0.06993 | 386.10028 | 0.53028 |
| 3807 | 3767.07717 | 9.56255  | 8328.03524  | 534.03210 | 1.57046  | 0.06668 | 538.72436 | 0.55608 |
| 3808 | 4134.27696 | 12.82959 | 12534.16647 | 237.53564 | -0.43917 | 0.00856 | 302.14381 | 0.17729 |
| 3809 | 4228.83373 | 18.89402 | 6832.18605  | 795.12927 | 2.86976  | 0.05509 | 820.41915 | 0.42422 |
| 3810 | 3845.80916 | 20.21935 | 6362.50645  | 592.68022 | 1.92100  | 0.02497 | 559.59659 | 0.50654 |
| 3811 | 4031.24336 | 25.78707 | 8776.18376  | 918.46859 | 3.75741  | 0.01711 | 897.38969 | 0.35476 |
| 3812 | 2898.61878 | 19.92343 | 7730.44405  | 531.75248 | 4.72742  | 0.27304 | 385.94769 | 1.09034 |
| 3813 | 3687.06280 | 21.83362 | 12220.01302 | 129.96547 | 3.56572  | 0.01691 | 92.18730  | 0.72952 |
| 3814 | 3560.71151 | 22.68616 | 12661.88430 | 154.71338 | 2.92035  | 0.01740 | 113.01524 | 0.85307 |
| 3815 | 4735.61450 | 21.67669 | 10128.77709 | 309.73966 | 4.29302  | 0.07379 | 348.87498 | 0.46284 |
| 3816 | 4564.21388 | 20.63486 | 17675.51287 | 485.11037 | 3.91215  | 0.08046 | 636.35231 | 0.42676 |
| 3817 | 4975.53261 | 10.29188 | 9095.97745  | 260.87046 | 1.20872  | 0.00443 | 390.13665 | 0.17301 |
| 3818 | 3768.29585 | 25.06459 | 7702.69989  | 49.16843  | 3.85167  | 0.00499 | 8.90545   | 1.50416 |
| 3819 | 4146.52543 | 16.45141 | 8955.08629  | 710.53124 | 0.33100  | 0.02185 | 781.19286 | 0.37936 |
| 3820 | 3132.19649 | 15.60783 | 6654.86188  | 302.27992 | 1.33203  | 0.01118 | 242.34908 | 0.24511 |
| 3821 | 3576.81877 | 13.38098 | 5208.62682  | 585.53965 | 2.08191  | 0.04274 | 527.46425 | 0.58194 |
| 3822 | 3877.43506 | 23.97425 | 12253.64725 | 475.54786 | 7.16046  | 0.01656 | 419.55757 | 0.06511 |
| 3823 | 4281.85247 | 14.23553 | 6826.07186  | 650.69363 | -1.41713 | 0.02400 | 747.68602 | 0.44157 |
| 3824 | 4969.75986 | 17.26377 | 8776.45690  | 624.98728 | 1.62733  | 0.01772 | 817.12336 | 0.29478 |
| 3825 | 2484.31204 | 14.47743 | 3639.97021  | 434.78997 | 5.02872  | 0.32702 | 484.64382 | 0.74446 |
| 3826 | 4417.43953 | 22.68203 | 8623.75802  | 671.90955 | 3.56990  | 0.01462 | 884.61966 | 0.26092 |
| 3827 | 3921.58429 | 18.58373 | 6918.32327  | 542.31351 | 6.04903  | 0.05665 | 440.89105 | 0.64644 |
| 3828 | 4616.03537 | 7.68708  | 17496.78611 | 115.97123 | -4.44835 | 0.00007 | 145.97998 | 0.09725 |

|      |            |          |             |            |          |         |           |         |
|------|------------|----------|-------------|------------|----------|---------|-----------|---------|
| 3829 | 4688.32653 | 15.32329 | 14184.23290 | 430.47056  | 4.80777  | 0.06728 | 605.34072 | 0.28338 |
| 3830 | 4412.20896 | 22.69507 | 8314.35827  | 655.08874  | 3.86684  | 0.01603 | 844.25216 | 0.30416 |
| 3831 | 4435.48842 | 12.57014 | 14631.65699 | 90.75653   | -0.38086 | 0.00067 | 85.11057  | 1.13048 |
| 3832 | 4504.54640 | 16.55706 | 8545.16943  | 577.97305  | -0.30029 | 0.02845 | 685.15850 | 0.30403 |
| 3833 | 4929.29914 | 19.86665 | 11117.05096 | 254.04559  | 2.41649  | 0.05045 | 318.51352 | 0.42946 |
| 3834 | 4080.01566 | 21.82459 | 8924.17531  | 836.62570  | 2.85877  | 0.03034 | 844.72369 | 0.52213 |
| 3835 | 4173.75693 | 18.99121 | 8215.45905  | 713.09289  | 1.86314  | 0.03785 | 731.24375 | 0.45471 |
| 3836 | 3736.38537 | 11.54443 | 8783.97124  | 589.61947  | 0.50482  | 0.03257 | 583.30887 | 0.60369 |
| 3837 | 4797.53022 | 16.83421 | 9914.59760  | 577.63585  | 1.35632  | 0.03649 | 747.18924 | 0.38130 |
| 3838 | 3944.44209 | 20.04369 | 9136.01948  | 720.08328  | 6.26636  | 0.05348 | 603.53599 | 0.67980 |
| 3839 | 4221.53553 | 24.73470 | 8238.30151  | 672.23999  | 2.87010  | 0.02542 | 747.28472 | 0.40133 |
| 3840 | 4704.30075 | 19.16895 | 9933.03020  | 687.45136  | 1.07602  | 0.04195 | 869.63373 | 0.27075 |
| 3841 | 4339.39057 | 17.15097 | 8215.13822  | 586.76203  | 2.87703  | 0.03914 | 625.91704 | 0.37352 |
| 3842 | 3831.06697 | 25.47950 | 6664.17465  | 68.55819   | 3.94243  | 0.00647 | 22.65614  | 1.50517 |
| 3843 | 2871.30617 | 16.51489 | 14001.48523 | 438.02845  | 3.54537  | 0.22790 | 352.94564 | 0.62349 |
| 3844 | 3973.88193 | 22.94010 | 7890.91572  | 823.10961  | 2.41374  | 0.03764 | 850.75204 | 0.50603 |
| 3845 | 3496.62346 | 23.97339 | 11584.80582 | 1014.54945 | 10.78286 | 0.15868 | 694.17356 | 1.82332 |
| 3846 | 4430.80905 | 14.64172 | 6180.77388  | 630.99359  | 3.34576  | 0.02784 | 737.79050 | 0.33695 |
| 3847 | 3505.61695 | 15.32079 | 11574.19797 | 420.36478  | 2.30161  | 0.08496 | 326.71361 | 0.50050 |
| 3848 | 4957.61872 | 6.63161  | 10232.60148 | 302.21724  | -1.92443 | 0.00642 | 429.70101 | 0.20534 |
| 3849 | 2486.12932 | 14.59367 | 3751.05641  | 407.54877  | 5.95649  | 0.34606 | 473.38912 | 1.09123 |
| 3850 | 4038.70929 | 20.61151 | 15268.22702 | 77.01365   | 1.12601  | 0.01506 | 35.63504  | 0.91974 |
| 3851 | 4526.92071 | 20.09849 | 21573.68677 | 535.64567  | 5.28885  | 0.11984 | 701.90851 | 0.43628 |
| 3852 | 4642.94705 | 20.11321 | 8006.36021  | 369.71222  | 3.25813  | 0.04485 | 507.95539 | 0.33435 |
| 3853 | 4250.94861 | 18.97638 | 7146.35110  | 791.93520  | 2.31136  | 0.04013 | 845.89397 | 0.40084 |
| 3854 | 4705.36340 | 19.21559 | 9868.36574  | 557.52691  | 1.80402  | 0.04722 | 710.57547 | 0.31033 |
| 3855 | 2950.68260 | 16.85706 | 15156.71290 | 437.15218  | 3.57561  | 0.23857 | 396.44734 | 0.71497 |
| 3856 | 4706.52783 | 11.08433 | 15910.94511 | 159.13584  | 2.85592  | 0.00520 | 214.09225 | 0.23196 |
| 3857 | 3837.14288 | 23.89819 | 7131.95807  | 672.76917  | 6.87930  | 0.06422 | 716.57529 | 0.42600 |
| 3858 | 4239.53903 | 17.41861 | 7576.42598  | 746.29893  | 1.35001  | 0.02902 | 802.97937 | 0.47715 |
| 3859 | 4820.97696 | 22.35540 | 10501.32598 | 643.02874  | 3.15647  | 0.01973 | 842.50732 | 0.27957 |
| 3860 | 4340.25151 | 19.41377 | 6386.56326  | 622.56433  | 1.73939  | 0.04716 | 693.15374 | 0.50521 |
| 3861 | 3771.65765 | 9.64501  | 8360.67559  | 508.30300  | 0.55527  | 0.05668 | 498.43546 | 0.52323 |
| 3862 | 4374.43925 | 20.37408 | 9975.51000  | 455.72873  | 1.10880  | 0.03981 | 496.78474 | 0.43194 |
| 3863 | 3672.65124 | 14.13261 | 9990.23040  | 494.21113  | 0.89612  | 0.06536 | 492.38668 | 0.68642 |
| 3864 | 4267.09175 | 16.23376 | 7795.89179  | 627.29030  | 0.70447  | 0.04124 | 697.44873 | 0.50959 |
| 3865 | 4529.61069 | 20.08919 | 21833.71248 | 426.74559  | 6.70215  | 0.11627 | 552.71981 | 0.26691 |
| 3866 | 2805.98585 | 14.62408 | 13939.53869 | 421.75227  | 4.62728  | 0.23977 | 384.26972 | 0.70113 |
| 3867 | 4704.28147 | 19.15179 | 9948.64741  | 651.37411  | 0.45562  | 0.04079 | 831.82618 | 0.31632 |
| 3868 | 4605.96703 | 22.30032 | 8626.34552  | 661.49593  | 3.00316  | 0.04313 | 809.01999 | 0.41839 |
| 3869 | 3605.32422 | 17.18922 | 17485.77120 | 449.99428  | -0.29757 | 0.10951 | 420.18426 | 0.96618 |
| 3870 | 4492.28503 | 20.50243 | 16571.97056 | 549.77322  | 2.22861  | 0.01269 | 671.03436 | 0.27443 |
| 3871 | 4546.44481 | 15.99710 | 11240.09996 | 424.32846  | 4.39915  | 0.07671 | 603.85013 | 0.38816 |
| 3872 | 4461.74332 | 21.00382 | 9404.87983  | 638.86652  | 2.45425  | 0.04368 | 821.04488 | 0.37826 |
| 3873 | 4319.81650 | 18.30986 | 7705.81332  | 482.75786  | 5.51436  | 0.11208 | 577.45793 | 0.41585 |
| 3874 | 5009.31027 | 10.09979 | 9279.55266  | 237.63352  | 1.82173  | 0.00536 | 344.95358 | 0.14841 |
| 3875 | 4931.66701 | 7.62231  | 9212.76561  | 276.06015  | -2.03688 | 0.00028 | 414.91388 | 0.02746 |
| 3876 | 4234.14872 | 18.86715 | 6832.02076  | 699.12703  | 3.15716  | 0.04220 | 733.85573 | 0.54691 |
| 3877 | 4240.12813 | 17.41317 | 7586.38783  | 637.67618  | 0.98766  | 0.02367 | 710.43911 | 0.48224 |
| 3878 | 4776.32369 | 10.26949 | 11808.87861 | 539.04698  | -0.13706 | 0.01378 | 710.68047 | 0.20131 |
| 3879 | 3397.23385 | 11.74042 | 7609.37037  | 538.48914  | 2.14974  | 0.08250 | 429.88009 | 0.58502 |
| 3880 | 4451.21904 | 19.81584 | 8023.59539  | 352.67465  | 5.63833  | 0.07693 | 382.60903 | 0.59704 |
| 3881 | 2560.43816 | 15.40161 | 11682.03955 | 335.96549  | 5.09418  | 0.37570 | 370.98960 | 0.49876 |
| 3882 | 4911.78823 | 12.72583 | 7712.40732  | 374.68462  | 3.45645  | 0.03746 | 504.95160 | 0.33277 |
| 3883 | 4372.30695 | 20.46583 | 9901.08491  | 584.33179  | 2.82255  | 0.04216 | 672.19759 | 0.44419 |
| 3884 | 4646.20404 | 22.36216 | 9653.66800  | 688.69448  | 1.79535  | 0.03615 | 887.63147 | 0.49801 |
| 3885 | 4958.03524 | 6.64238  | 9524.13235  | 452.04618  | -1.59626 | 0.00667 | 662.03501 | 0.19746 |
| 3886 | 4887.06528 | 9.35098  | 12687.67141 | 354.89816  | 1.84491  | 0.01829 | 529.85438 | 0.24084 |
| 3887 | 3843.70264 | 20.23071 | 6345.80201  | 700.63841  | 1.86303  | 0.02412 | 745.87915 | 0.48336 |
| 3888 | 4917.87390 | 10.73597 | 8904.60579  | 209.40770  | 2.00299  | 0.00552 | 303.28431 | 0.13568 |
| 3889 | 3366.82003 | 20.20092 | 9782.51272  | 124.40408  | 2.75027  | 0.01108 | 86.90959  | 1.10778 |
| 3890 | 4701.84053 | 11.07140 | 15880.89621 | 142.17450  | 3.48804  | 0.00501 | 178.70407 | 0.19616 |
| 3891 | 4604.18938 | 18.85393 | 8409.12067  | 403.86580  | 4.63063  | 0.03292 | 525.73374 | 0.29269 |
| 3892 | 4139.07195 | 12.91783 | 12559.21457 | 227.04264  | -0.25462 | 0.00819 | 296.86666 | 0.16450 |
| 3893 | 4619.51166 | 15.30581 | 18062.08450 | 48.15235   | -0.30504 | 0.00602 | 9.57454   | 1.11709 |
| 3894 | 4640.76082 | 7.46006  | 17011.10182 | 91.74169   | -2.06771 | 0.00001 | 100.01287 | 0.12002 |
| 3895 | 4539.24874 | 20.92031 | 15706.39733 | 682.34686  | 3.06176  | 0.01168 | 803.79811 | 0.24340 |
| 3896 | 4335.05474 | 18.27181 | 6882.07503  | 552.16763  | 3.26046  | 0.03255 | 602.45721 | 0.49711 |
| 3897 | 4790.83032 | 16.70892 | 9863.24134  | 612.05377  | 0.78574  | 0.04486 | 789.07590 | 0.33014 |
| 3898 | 4255.22016 | 18.99582 | 7161.59872  | 817.30035  | 3.41816  | 0.05398 | 918.27027 | 0.40059 |
| 3899 | 5022.61585 | 18.23788 | 10076.50708 | 321.49831  | 2.81924  | 0.01805 | 452.66264 | 0.25359 |

|      |            |          |             |           |          |         |           |         |
|------|------------|----------|-------------|-----------|----------|---------|-----------|---------|
| 3900 | 3833.10475 | 20.20411 | 6288.55595  | 847.45584 | 2.86720  | 0.02928 | 841.49978 | 0.44737 |
| 3901 | 3839.40639 | 23.94473 | 7125.92126  | 668.39020 | 7.94328  | 0.07338 | 659.35221 | 0.35644 |
| 3902 | 3213.77288 | 19.36696 | 13065.87601 | 343.13007 | 2.86767  | 0.17128 | 244.24969 | 0.72807 |
| 3903 | 4490.27066 | 21.08352 | 9242.67416  | 573.40257 | 2.74235  | 0.04287 | 740.96092 | 0.38217 |
| 3904 | 4798.18733 | 16.83824 | 9918.54133  | 558.82339 | 1.54531  | 0.03501 | 716.27966 | 0.37564 |
| 3905 | 3755.75940 | 12.28647 | 6509.97525  | 286.25208 | -2.24726 | 0.01514 | 274.36034 | 0.38867 |
| 3906 | 4878.70821 | 7.75205  | 10014.32890 | 413.18409 | 0.00015  | 0.00790 | 549.57767 | 0.23824 |
| 3907 | 4547.92285 | 16.03151 | 11262.82227 | 318.49343 | 4.96945  | 0.07774 | 447.38314 | 0.38832 |
| 3908 | 2565.68818 | 16.33302 | 11366.33233 | 412.90748 | 5.41499  | 0.36357 | 449.77203 | 0.52802 |
| 3909 | 3697.14895 | 24.56160 | 6229.39707  | 585.70164 | 2.87460  | 0.04182 | 526.39242 | 0.45516 |
| 3910 | 3378.81406 | 9.60508  | 6916.07085  | 364.21530 | 2.56635  | 0.06635 | 327.87911 | 0.51553 |
| 3911 | 3397.04212 | 11.70069 | 7617.18057  | 593.34459 | 2.10856  | 0.08035 | 497.35586 | 0.62312 |
| 3912 | 3476.68607 | 13.91221 | 7317.47422  | 468.91922 | 2.02334  | 0.06188 | 399.79127 | 0.59656 |
| 3913 | 3394.70066 | 11.75186 | 7577.49010  | 693.52030 | 2.64200  | 0.09171 | 605.72267 | 0.76262 |
| 3914 | 3990.67766 | 22.93396 | 7947.69438  | 673.23124 | 2.57943  | 0.03285 | 670.20602 | 0.54510 |
| 3915 | 4514.04218 | 19.82785 | 7358.36735  | 721.71529 | 1.92012  | 0.04895 | 868.25931 | 0.43957 |
| 3916 | 3755.51740 | 12.30478 | 6495.02718  | 326.92221 | -1.42595 | 0.01499 | 340.00096 | 0.37891 |
| 3917 | 4885.66257 | 9.31717  | 12567.15260 | 376.76494 | 1.17149  | 0.01610 | 558.52955 | 0.26109 |
| 3918 | 4062.13434 | 14.36662 | 10829.72695 | 67.11043  | -1.74930 | 0.00542 | 40.48455  | 0.82333 |
| 3919 | 4784.33507 | 15.47568 | 7009.52155  | 346.26074 | 2.56088  | 0.01348 | 501.48592 | 0.22758 |
| 3920 | 3396.91472 | 11.78931 | 7596.38098  | 613.01809 | 3.05948  | 0.09137 | 519.97155 | 0.79252 |
| 3921 | 4979.75026 | 17.68422 | 8742.35420  | 699.06521 | 1.34063  | 0.02475 | 909.47595 | 0.29694 |
| 3922 | 4173.76369 | 18.97216 | 8215.05770  | 855.89866 | 2.22923  | 0.03410 | 902.35555 | 0.46226 |
| 3923 | 3186.70424 | 16.55988 | 7073.99397  | 343.71225 | 2.43054  | 0.12117 | 221.16136 | 0.71985 |
| 3924 | 4672.91526 | 20.19006 | 8216.95883  | 379.41837 | 4.22522  | 0.04655 | 525.93470 | 0.30257 |
| 3925 | 3753.83060 | 12.26770 | 6493.34343  | 266.99006 | -2.31226 | 0.01660 | 247.43735 | 0.39229 |
| 3926 | 4420.35081 | 22.71252 | 8506.37277  | 611.49650 | 3.35050  | 0.01359 | 806.70940 | 0.23380 |
| 3927 | 3418.07841 | 20.41920 | 6135.62402  | 71.09929  | 4.19423  | 0.03064 | 18.94822  | 1.33395 |
| 3928 | 4573.92342 | 7.64494  | 8695.43261  | 337.34839 | -1.91996 | 0.00419 | 485.82432 | 0.08023 |
| 3929 | 4844.91099 | 12.72989 | 15159.21714 | 462.72125 | 2.60840  | 0.02524 | 657.51784 | 0.32581 |
| 3930 | 3181.47714 | 15.81670 | 9641.17525  | 592.72195 | 4.00853  | 0.20901 | 512.99871 | 0.71644 |
| 3931 | 3132.93978 | 15.60920 | 6681.75108  | 369.03688 | 2.34585  | 0.01568 | 358.05900 | 0.24988 |
| 3932 | 4512.45787 | 19.84560 | 7324.22002  | 494.10661 | 2.35236  | 0.05255 | 594.13579 | 0.44186 |
| 3933 | 4177.13830 | 18.98146 | 8254.10260  | 637.19138 | 1.23701  | 0.03403 | 688.69916 | 0.54857 |
| 3934 | 4504.52442 | 16.54174 | 8919.31114  | 581.70700 | -0.84093 | 0.02753 | 692.56079 | 0.43057 |
| 3935 | 4768.33095 | 8.14218  | 9427.23357  | 294.73904 | -0.64067 | 0.00342 | 416.26342 | 0.10275 |
| 3936 | 3745.37481 | 12.91924 | 13567.86140 | 150.63488 | -1.26452 | 0.00387 | 156.88527 | 0.27745 |
| 3937 | 4904.35388 | 13.51972 | 8057.57360  | 445.42229 | 2.27799  | 0.01829 | 650.96953 | 0.21549 |
| 3938 | 4900.68417 | 12.90041 | 7410.20719  | 346.53843 | 4.35900  | 0.03989 | 452.44170 | 0.28926 |
| 3939 | 4355.89087 | 23.79467 | 10478.97271 | 907.82520 | 4.82250  | 0.03881 | 942.98842 | 0.55963 |
| 3940 | 4837.63435 | 14.50398 | 11308.80947 | 375.24162 | 2.75188  | 0.03001 | 560.22691 | 0.23901 |
| 3941 | 4633.03410 | 20.67601 | 9207.29760  | 576.69373 | 3.53607  | 0.07614 | 726.13463 | 0.49276 |
| 3942 | 3996.68513 | 22.91851 | 7965.19114  | 629.42352 | 2.39495  | 0.03005 | 654.52183 | 0.55310 |
| 3943 | 2912.56725 | 16.57472 | 15021.65528 | 290.12350 | 4.72737  | 0.20094 | 212.60106 | 0.68473 |
| 3944 | 4095.25659 | 18.23648 | 14734.05213 | 75.64043  | 1.57213  | 0.01201 | 42.56518  | 1.18606 |
| 3945 | 3412.81327 | 20.07742 | 7159.41317  | 77.00557  | 4.09695  | 0.00625 | 27.56607  | 1.42116 |
| 3946 | 3988.11671 | 22.96309 | 7949.91888  | 765.46563 | 1.88761  | 0.03398 | 802.97207 | 0.49773 |
| 3947 | 3224.39016 | 24.96652 | 7577.49490  | 411.84951 | 4.21950  | 0.12172 | 179.03968 | 1.30931 |
| 3948 | 4895.30079 | 12.79147 | 7482.30651  | 385.73682 | 4.04381  | 0.03574 | 534.53447 | 0.31871 |
| 3949 | 4525.91563 | 19.96367 | 7359.71919  | 638.81270 | 1.01463  | 0.05094 | 782.40901 | 0.42373 |
| 3950 | 4265.10398 | 10.73793 | 14743.64438 | 117.75213 | -2.10343 | 0.00121 | 121.55650 | 0.98570 |
| 3951 | 3529.10285 | 16.67144 | 17003.88581 | 461.12338 | 0.58225  | 0.13850 | 403.23610 | 0.76580 |
| 3952 | 2853.33344 | 15.21350 | 14842.86113 | 346.57913 | 4.18870  | 0.23637 | 241.17416 | 0.74729 |
| 3953 | 4377.85604 | 18.82881 | 8568.25248  | 581.60019 | 1.72482  | 0.04048 | 650.97031 | 0.42724 |
| 3954 | 4670.44295 | 16.61063 | 18065.07411 | 433.12117 | 3.57873  | 0.09091 | 599.73878 | 0.48497 |
| 3955 | 4571.51831 | 14.12648 | 21540.63149 | 58.90769  | -2.14048 | 0.00001 | 22.55099  | 0.42020 |
| 3956 | 3190.72223 | 16.69606 | 7059.97781  | 347.62673 | 1.89885  | 0.09826 | 290.65348 | 0.64216 |
| 3957 | 4975.53343 | 10.29294 | 8742.02741  | 236.37717 | 1.88402  | 0.00446 | 353.31190 | 0.17624 |
| 3958 | 2891.04849 | 15.71834 | 15621.22875 | 436.22343 | 4.05379  | 0.22438 | 421.24198 | 0.83158 |
| 3959 | 4400.52324 | 6.53019  | 7960.78575  | 305.69487 | -3.51859 | 0.00281 | 397.20659 | 0.15807 |
| 3960 | 4415.93450 | 22.70628 | 8379.67421  | 659.85101 | 2.72930  | 0.01425 | 849.76494 | 0.30127 |
| 3961 | 3914.57603 | 12.93395 | 12073.88625 | 337.78962 | -0.02032 | 0.03347 | 382.61118 | 0.31284 |
| 3962 | 4790.76614 | 10.25147 | 11224.91006 | 384.46508 | 0.09640  | 0.02535 | 476.73850 | 0.39717 |
| 3963 | 4332.49698 | 18.33169 | 6860.60361  | 559.41737 | 4.31339  | 0.03228 | 572.46528 | 0.50733 |
| 3964 | 4458.22181 | 19.57502 | 5695.13864  | 528.35699 | 3.05137  | 0.03925 | 634.73436 | 0.41769 |
| 3965 | 4423.64494 | 11.43125 | 8383.62092  | 537.34836 | -2.13880 | 0.01095 | 662.06742 | 0.28668 |
| 3966 | 4232.48551 | 18.86374 | 6826.68411  | 621.77716 | 2.70337  | 0.04440 | 677.90312 | 0.56085 |
| 3967 | 4688.01773 | 18.32896 | 16737.56468 | 336.60076 | 4.02382  | 0.02972 | 443.03975 | 0.16964 |
| 3968 | 5014.35328 | 10.02730 | 9392.39730  | 239.84694 | -0.15220 | 0.00498 | 347.10383 | 0.18056 |
| 3969 | 3220.30094 | 14.51152 | 10061.17467 | 394.06428 | 3.19153  | 0.08334 | 422.43678 | 0.43728 |
| 3970 | 2491.61284 | 14.52516 | 3949.63885  | 409.02683 | 6.00936  | 0.33238 | 418.63559 | 0.24438 |

|      |            |          |             |           |          |         |           |         |
|------|------------|----------|-------------|-----------|----------|---------|-----------|---------|
| 3971 | 4713.01969 | 15.82866 | 11104.63538 | 451.55317 | 4.86890  | 0.05735 | 582.19785 | 0.29507 |
| 3972 | 4291.95950 | 18.14393 | 6920.16284  | 663.48028 | 2.27280  | 0.04878 | 713.41615 | 0.52453 |
| 3973 | 3536.12344 | 16.74700 | 17269.31873 | 409.17483 | 0.84638  | 0.14681 | 366.21081 | 0.77954 |
| 3974 | 4768.74580 | 8.12743  | 9562.37870  | 382.20979 | -2.12380 | 0.00325 | 561.16601 | 0.07782 |
| 3975 | 2980.90238 | 16.93535 | 15677.48781 | 323.41135 | 2.87695  | 0.14147 | 285.92036 | 0.85193 |
| 3976 | 4280.70783 | 14.23359 | 6796.84380  | 466.32398 | -2.49050 | 0.02215 | 538.38863 | 0.35422 |
| 3977 | 3699.61676 | 25.42111 | 10508.80593 | 57.83790  | 2.67049  | 0.01283 | 15.77657  | 1.19404 |
| 3978 | 5023.38238 | 13.88871 | 8349.62551  | 346.80128 | 3.64178  | 0.01831 | 508.02244 | 0.15683 |
| 3979 | 4264.70967 | 23.20742 | 11933.57461 | 838.58563 | 5.11366  | 0.00985 | 963.33569 | 0.12359 |
| 3980 | 4708.04755 | 15.76161 | 11395.93091 | 487.38290 | 3.98971  | 0.04910 | 640.27277 | 0.38794 |
| 3981 | 3110.88990 | 19.69232 | 10610.32382 | 428.94572 | 3.72886  | 0.13439 | 248.15055 | 1.15817 |
| 3982 | 4927.17850 | 7.61073  | 9096.11256  | 308.96443 | -2.11412 | 0.00056 | 462.66205 | 0.03088 |
| 3983 | 4654.47574 | 19.49236 | 12273.78454 | 246.42785 | 4.79208  | 0.10457 | 281.88158 | 0.42717 |
| 3984 | 4004.64336 | 9.97052  | 9308.90347  | 381.64969 | -0.47254 | 0.01166 | 473.37458 | 0.16369 |
| 3985 | 4969.64654 | 17.24850 | 7947.60208  | 498.34053 | 0.61790  | 0.01772 | 662.30502 | 0.30184 |
| 3986 | 4835.42522 | 15.68533 | 8437.98354  | 269.30580 | 3.07380  | 0.03102 | 382.33798 | 0.20887 |
| 3987 | 4705.94438 | 11.05956 | 15919.66446 | 109.39325 | 1.72531  | 0.00418 | 113.51155 | 0.20178 |
| 3988 | 4338.59501 | 19.42219 | 6379.64117  | 625.75156 | 2.57883  | 0.04664 | 660.77873 | 0.52936 |
| 3989 | 4894.97192 | 9.76786  | 8027.86144  | 131.26422 | 1.14817  | 0.00484 | 155.67159 | 0.24236 |
| 3990 | 4201.76116 | 23.77030 | 8496.39244  | 650.79630 | 2.41238  | 0.04941 | 683.56745 | 0.60776 |
| 3991 | 4580.47541 | 18.01815 | 8176.92956  | 502.40846 | 1.76496  | 0.02656 | 666.30102 | 0.29526 |
| 3992 | 4637.04631 | 16.97347 | 10099.45030 | 333.68256 | 4.51023  | 0.06064 | 455.72005 | 0.52787 |
| 3993 | 3504.95030 | 15.33033 | 11541.40853 | 558.97247 | 2.36595  | 0.10923 | 514.85866 | 0.52234 |
| 3994 | 4261.28184 | 18.99902 | 7182.65555  | 917.60820 | 4.14994  | 0.05588 | 967.01815 | 0.42196 |
| 3995 | 2455.38884 | 13.54142 | 3903.96665  | 385.85045 | 6.41716  | 0.27070 | 397.97913 | 0.43099 |
| 3996 | 4755.63129 | 14.71469 | 11408.71044 | 353.89834 | 2.90813  | 0.02264 | 507.95201 | 0.33754 |
| 3997 | 4958.60445 | 6.66303  | 9989.51302  | 400.15350 | -0.16098 | 0.00809 | 574.04501 | 0.18509 |
| 3998 | 3505.31107 | 9.34944  | 8008.66975  | 400.32034 | 0.57758  | 0.03097 | 307.70753 | 0.48131 |
| 3999 | 4436.60883 | 20.32169 | 8198.82360  | 601.16315 | 5.20706  | 0.11580 | 694.13547 | 0.54974 |
| 4000 | 4816.27833 | 22.33754 | 11762.18834 | 462.33089 | 3.92172  | 0.01681 | 607.25743 | 0.28674 |
| 4001 | 4368.40577 | 18.85566 | 9572.82988  | 567.01932 | 3.17325  | 0.05422 | 639.80481 | 0.33463 |
| 4002 | 4493.18898 | 12.55177 | 9302.06611  | 618.98280 | 1.21718  | 0.02965 | 721.72741 | 0.24971 |
| 4003 | 4218.54128 | 24.74811 | 8234.64479  | 796.56489 | 1.70104  | 0.02804 | 847.55795 | 0.40339 |
| 4004 | 4254.44459 | 18.99415 | 7168.11471  | 918.86898 | 3.38198  | 0.05497 | 959.99644 | 0.39052 |
| 4005 | 4943.40508 | 13.10300 | 9436.49681  | 424.80362 | 2.10322  | 0.01021 | 637.15365 | 0.16775 |
| 4006 | 4896.95803 | 12.83285 | 7301.42063  | 458.86575 | 2.66512  | 0.04046 | 627.33431 | 0.31638 |
| 4007 | 3506.97165 | 15.36739 | 11605.98070 | 396.68845 | 2.07953  | 0.09133 | 311.91438 | 0.44990 |
| 4008 | 4504.41743 | 16.67259 | 8882.56508  | 530.93196 | 0.53792  | 0.03799 | 648.67672 | 0.43021 |
| 4009 | 3381.16155 | 9.71825  | 6876.99749  | 305.50470 | 1.84878  | 0.05787 | 280.58421 | 0.41460 |
| 4010 | 4707.60798 | 15.76844 | 11404.24139 | 505.33599 | 4.93186  | 0.05092 | 665.48077 | 0.38679 |
| 4011 | 3680.95398 | 7.69921  | 5924.76946  | 378.93036 | -0.53547 | 0.01974 | 344.82493 | 0.52890 |
| 4012 | 4516.41020 | 21.22505 | 10056.56526 | 371.96038 | 6.18037  | 0.08569 | 412.03456 | 0.52800 |
| 4013 | 4948.48529 | 6.81067  | 16907.83661 | 152.19791 | -2.35493 | 0.00197 | 203.83795 | 0.18398 |
| 4014 | 2792.27718 | 14.55355 | 13674.41736 | 454.40377 | 4.97914  | 0.24956 | 451.66876 | 0.78191 |
| 4015 | 4894.56995 | 12.78174 | 7481.72112  | 446.61143 | 2.32368  | 0.04077 | 615.39246 | 0.30706 |
| 4016 | 4460.09609 | 20.43438 | 16348.33229 | 574.35689 | 3.56292  | 0.01636 | 732.47742 | 0.28705 |
| 4017 | 3517.26439 | 9.37919  | 8271.32661  | 430.49989 | 0.36982  | 0.03238 | 366.43265 | 0.46060 |
| 4018 | 4610.72547 | 22.33262 | 8660.28566  | 675.26531 | 2.60111  | 0.05004 | 808.33389 | 0.45817 |
| 4019 | 4492.15408 | 20.51563 | 16029.88365 | 635.82337 | 2.76203  | 0.01240 | 767.28182 | 0.27804 |
| 4020 | 3615.22066 | 13.37201 | 20289.25319 | 278.03060 | 1.99399  | 0.02331 | 310.95245 | 0.25143 |
| 4021 | 5075.63436 | 13.21886 | 9858.37952  | 113.95282 | 1.16176  | 0.00137 | 137.66583 | 0.31022 |
| 4022 | 3372.09900 | 20.38110 | 10527.58686 | 196.04434 | 4.34223  | 0.01942 | 217.62565 | 0.92591 |
| 4023 | 3651.61877 | 25.47690 | 9643.10770  | 123.22984 | 4.90022  | 0.01090 | 80.99178  | 1.01633 |
| 4024 | 3776.67997 | 9.56088  | 8266.52542  | 371.75022 | -0.74581 | 0.04496 | 317.77814 | 0.66929 |
| 4025 | 5092.77519 | 13.35066 | 10132.94256 | 68.09564  | -1.60252 | 0.00095 | 51.18185  | 0.38256 |
| 4026 | 4054.66579 | 13.20187 | 15139.21184 | 119.04920 | -1.41672 | 0.00396 | 105.39449 | 0.64953 |
| 4027 | 4835.30677 | 15.67466 | 8434.08022  | 391.23083 | 3.04790  | 0.02862 | 575.63722 | 0.21489 |
| 4028 | 2894.11497 | 16.57163 | 14426.01780 | 338.51517 | 4.35219  | 0.23431 | 222.77306 | 0.70469 |
| 4029 | 4818.33171 | 22.33543 | 10036.38980 | 644.31836 | 2.83856  | 0.02103 | 849.70629 | 0.24200 |
| 4030 | 3542.32906 | 17.33772 | 8071.95230  | 310.62229 | -0.70805 | 0.04009 | 263.09461 | 0.61790 |
| 4031 | 4724.33432 | 21.58222 | 10066.48990 | 498.33870 | 4.08446  | 0.06450 | 624.39959 | 0.45237 |
| 4032 | 4491.53671 | 21.07917 | 9225.70391  | 565.52596 | 2.39503  | 0.04154 | 729.58040 | 0.36476 |
| 4033 | 4793.62326 | 10.34806 | 11108.41445 | 530.32783 | 0.62487  | 0.03390 | 682.85310 | 0.42063 |
| 4034 | 4808.25666 | 22.29373 | 10462.43919 | 584.89216 | 2.99000  | 0.01641 | 765.49378 | 0.27126 |
| 4035 | 4709.29042 | 15.78691 | 11083.33405 | 338.52857 | 4.62424  | 0.05804 | 422.98122 | 0.31225 |
| 4036 | 3583.08130 | 13.22343 | 5363.98538  | 619.69267 | 0.16976  | 0.04298 | 591.18945 | 0.57082 |
| 4037 | 4617.42908 | 7.82738  | 16355.08995 | 124.12960 | -2.04105 | 0.00002 | 158.03123 | 0.08029 |
| 4038 | 3503.27766 | 15.34439 | 11575.38329 | 493.00433 | 1.72754  | 0.09049 | 478.29446 | 0.42621 |
| 4039 | 3338.98966 | 24.26446 | 11595.39066 | 527.34754 | 4.69385  | 0.06741 | 428.50033 | 0.74111 |
| 4040 | 4889.13282 | 19.86965 | 11148.22704 | 381.40852 | 2.64259  | 0.06564 | 522.97669 | 0.38845 |
| 4041 | 4604.03099 | 20.64835 | 21014.49412 | 459.00312 | 5.48782  | 0.08005 | 594.40504 | 0.48457 |

|      |            |          |             |           |          |         |           |         |
|------|------------|----------|-------------|-----------|----------|---------|-----------|---------|
| 4042 | 4573.74438 | 7.63439  | 8602.84259  | 351.36805 | -1.74715 | 0.00541 | 499.33538 | 0.12451 |
| 4043 | 3211.49862 | 19.37838 | 13019.63838 | 457.27809 | 2.37133  | 0.17601 | 423.45251 | 0.73105 |
| 4044 | 2950.89098 | 24.99179 | 7130.86148  | 611.22391 | 6.40590  | 0.17218 | 370.40310 | 0.81053 |
| 4045 | 4246.77120 | 19.00609 | 7266.32623  | 416.13089 | 2.45939  | 0.04391 | 413.60275 | 0.45104 |
| 4046 | 4417.43405 | 17.81107 | 7204.76049  | 585.12437 | 0.62431  | 0.02992 | 689.58529 | 0.44405 |
| 4047 | 4797.36110 | 16.81192 | 9904.52810  | 568.48896 | 0.98644  | 0.03683 | 740.40349 | 0.37194 |
| 4048 | 4877.72058 | 16.88425 | 8559.74413  | 443.78522 | 5.67002  | 0.06729 | 592.14467 | 0.36216 |
| 4049 | 4922.35515 | 7.59689  | 9062.26344  | 317.01985 | -3.90723 | 0.00060 | 467.30097 | 0.03169 |
| 4050 | 4958.12239 | 6.63989  | 10863.83318 | 366.50691 | -3.58334 | 0.00583 | 517.34696 | 0.20937 |
| 4051 | 4370.27807 | 20.40253 | 9916.49462  | 625.99413 | 2.72158  | 0.04974 | 695.05883 | 0.35472 |
| 4052 | 4442.02691 | 20.45769 | 8218.89020  | 397.58844 | 6.09064  | 0.09479 | 424.32587 | 0.52278 |
| 4053 | 4747.92613 | 15.99789 | 20775.02631 | 366.99051 | 3.43264  | 0.05464 | 496.54385 | 0.63064 |
| 4054 | 4365.82149 | 18.88304 | 9560.25540  | 579.19484 | 2.20400  | 0.04636 | 680.87703 | 0.33477 |
| 4055 | 3505.85270 | 9.30341  | 7978.98810  | 382.18517 | 0.04043  | 0.03455 | 337.45261 | 0.41569 |
| 4056 | 3535.04815 | 23.35636 | 9149.02124  | 905.19502 | 7.14467  | 0.07877 | 704.43275 | 1.24892 |
| 4057 | 4875.81177 | 7.72839  | 9708.77049  | 525.24427 | 0.36740  | 0.01003 | 736.37056 | 0.23575 |
| 4058 | 5009.04284 | 10.09085 | 9282.85330  | 249.58124 | 1.00426  | 0.00606 | 352.80423 | 0.11819 |
| 4059 | 4290.79821 | 17.70831 | 7548.74700  | 660.39668 | 3.99202  | 0.05089 | 647.89744 | 0.43335 |
| 4060 | 4399.24413 | 6.55929  | 7969.12801  | 338.38432 | -2.67262 | 0.00277 | 455.79172 | 0.10104 |
| 4061 | 3613.47672 | 17.66459 | 7327.32673  | 476.92020 | -0.25815 | 0.05402 | 465.26699 | 0.86251 |
| 4062 | 4244.53895 | 17.30723 | 7629.52559  | 669.05211 | -1.35089 | 0.02213 | 750.19614 | 0.51047 |
| 4063 | 4157.05917 | 15.60769 | 13986.01707 | 96.38983  | -1.14039 | 0.00154 | 83.91600  | 0.96717 |
| 4064 | 4674.39442 | 18.89225 | 12411.13793 | 386.81800 | 4.76488  | 0.03924 | 468.68641 | 0.38140 |
| 4065 | 4980.18122 | 17.65207 | 8840.95459  | 665.60304 | 0.83053  | 0.01883 | 886.00910 | 0.30825 |
| 4066 | 4705.04850 | 19.16426 | 9947.23970  | 608.44076 | 0.79756  | 0.04280 | 779.64032 | 0.29503 |
| 4067 | 2903.56632 | 20.04372 | 7894.54221  | 480.45378 | 4.46769  | 0.27928 | 329.48055 | 1.11373 |
| 4068 | 4463.75178 | 21.78751 | 7669.47762  | 632.47546 | 3.88051  | 0.03661 | 800.32907 | 0.23729 |
| 4069 | 4456.64217 | 16.24893 | 15842.14442 | 53.27044  | 1.31876  | 0.00899 | 16.27028  | 1.20150 |
| 4070 | 4634.38014 | 20.68033 | 9191.79564  | 622.70111 | 3.95020  | 0.07379 | 764.13641 | 0.49744 |
| 4071 | 4605.84953 | 22.19773 | 10986.37783 | 545.02851 | 4.42911  | 0.06961 | 657.41968 | 0.56121 |
| 4072 | 4189.02334 | 11.84274 | 11849.92596 | 176.07230 | -1.56060 | 0.00121 | 204.69696 | 0.58644 |
| 4073 | 4921.42466 | 7.61078  | 9075.70332  | 316.12626 | -3.03023 | 0.00049 | 460.19305 | 0.03200 |
| 4074 | 4547.57358 | 20.95814 | 15718.51874 | 836.87220 | 3.84451  | 0.01205 | 983.43655 | 0.24927 |
| 4075 | 3533.11670 | 15.26156 | 11896.45584 | 379.39108 | 0.52401  | 0.07184 | 303.57146 | 0.55714 |
| 4076 | 4175.74652 | 18.95621 | 8234.00311  | 680.13325 | 2.03717  | 0.03288 | 691.02563 | 0.56114 |
| 4077 | 4132.47799 | 12.82919 | 12607.79831 | 263.94668 | 0.15305  | 0.00940 | 319.01195 | 0.19078 |
| 4078 | 3192.50205 | 16.73073 | 7078.04151  | 376.51703 | 1.51571  | 0.09117 | 290.86370 | 0.67723 |
| 4079 | 2929.88476 | 20.16481 | 8127.27423  | 661.81461 | 4.45766  | 0.28366 | 574.43998 | 1.05899 |
| 4080 | 3353.39545 | 7.23182  | 13298.28006 | 332.58133 | 1.70314  | 0.03382 | 274.96302 | 0.48970 |
| 4081 | 4080.14727 | 21.84301 | 8924.02677  | 787.43267 | 2.54224  | 0.02883 | 820.18114 | 0.49923 |
| 4082 | 3703.41731 | 7.83271  | 6095.14416  | 401.75518 | -1.98836 | 0.02043 | 420.96986 | 0.50573 |
| 4083 | 4973.44012 | 9.85030  | 9292.89620  | 331.66447 | 0.09799  | 0.00665 | 460.79222 | 0.08157 |
| 4084 | 3848.74772 | 24.38429 | 6296.95416  | 845.69912 | 4.03031  | 0.01757 | 812.42126 | 0.74100 |
| 4085 | 4345.36935 | 18.80916 | 7875.50197  | 529.76456 | 5.94850  | 0.11549 | 648.22885 | 0.48431 |
| 4086 | 3522.02381 | 16.69947 | 17036.20685 | 488.72921 | 2.30901  | 0.16356 | 457.73996 | 0.82823 |
| 4087 | 4820.93614 | 20.94071 | 7794.74536  | 411.02071 | 3.16663  | 0.04167 | 486.70514 | 0.42297 |
| 4088 | 4333.84386 | 17.20645 | 8154.50764  | 588.38369 | 2.11026  | 0.04394 | 643.83707 | 0.42275 |
| 4089 | 3767.26333 | 11.91923 | 9273.05920  | 695.17104 | 1.15738  | 0.02982 | 678.31943 | 0.64792 |
| 4090 | 4846.56444 | 14.67154 | 10669.26261 | 383.04074 | 4.35585  | 0.03461 | 575.59983 | 0.19904 |
| 4091 | 2910.34962 | 16.54883 | 14942.99669 | 384.58200 | 4.09336  | 0.19754 | 359.67817 | 0.65853 |
| 4092 | 4983.28771 | 17.71982 | 8849.67703  | 581.69827 | 2.02202  | 0.01978 | 768.76336 | 0.31904 |
| 4093 | 4402.46015 | 15.35683 | 24566.93767 | 78.49790  | -1.43518 | 0.00027 | 51.15246  | 0.29869 |
| 4094 | 4339.61164 | 17.15286 | 8215.23812  | 491.64527 | 1.63095  | 0.03976 | 501.54766 | 0.38195 |
| 4095 | 2909.31684 | 20.06975 | 7848.31008  | 458.44352 | 4.93437  | 0.26231 | 284.59511 | 1.12037 |
| 4096 | 4758.57412 | 8.22033  | 9927.23293  | 308.37349 | -3.96711 | 0.00293 | 429.86814 | 0.07526 |
| 4097 | 4767.69387 | 8.13683  | 9561.63834  | 364.03374 | -3.14759 | 0.00301 | 518.26086 | 0.08226 |
| 4098 | 4333.83288 | 17.10964 | 8144.63408  | 562.23330 | 3.84760  | 0.05323 | 575.43625 | 0.31132 |
| 4099 | 4911.30762 | 12.72494 | 7773.42595  | 401.25988 | 2.77959  | 0.03526 | 544.59229 | 0.32382 |
| 4100 | 4980.87498 | 17.69175 | 8866.39151  | 585.13489 | 0.55074  | 0.02230 | 793.16302 | 0.31720 |
| 4101 | 4346.70993 | 23.78284 | 10441.60212 | 893.02019 | 3.54404  | 0.03879 | 928.00326 | 0.55188 |
| 4102 | 4905.17097 | 13.50109 | 8073.18722  | 530.24805 | 3.06093  | 0.01554 | 768.34048 | 0.22268 |
| 4103 | 3652.12936 | 23.86021 | 10474.05766 | 991.75065 | 8.48316  | 0.05061 | 821.16185 | 1.16288 |
| 4104 | 4845.37318 | 12.69484 | 16827.88862 | 405.83490 | 4.36029  | 0.02088 | 578.89751 | 0.30818 |
| 4105 | 3826.89740 | 23.81376 | 12165.60341 | 711.99483 | 6.97847  | 0.01903 | 716.24517 | 0.06172 |
| 4106 | 4831.42191 | 14.36684 | 11000.27086 | 425.23406 | 3.10073  | 0.03174 | 641.38626 | 0.23684 |
| 4107 | 4544.97851 | 14.46944 | 22116.94034 | 66.44637  | -2.56578 | 0.00006 | 25.57337  | 0.42929 |
| 4108 | 3293.21579 | 17.28448 | 7428.95153  | 389.84805 | 0.86244  | 0.08305 | 308.50904 | 0.79733 |
| 4109 | 4766.34834 | 18.35611 | 10660.52986 | 565.41055 | 2.15786  | 0.03885 | 721.09942 | 0.34337 |
| 4110 | 2812.04846 | 14.74304 | 13973.64154 | 371.25037 | 4.83428  | 0.24235 | 287.06538 | 0.69856 |
| 4111 | 3475.63098 | 13.91577 | 7304.71235  | 402.25778 | 1.19027  | 0.06342 | 349.74779 | 0.58694 |
| 4112 | 3533.67461 | 15.23331 | 11896.60597 | 430.96118 | 0.78849  | 0.06890 | 364.65884 | 0.65543 |

|      |            |          |             |           |          |         |           |         |
|------|------------|----------|-------------|-----------|----------|---------|-----------|---------|
| 4113 | 4416.96642 | 17.81547 | 7199.93125  | 638.28436 | 0.89752  | 0.03043 | 756.82693 | 0.45747 |
| 4114 | 4333.55657 | 17.25302 | 8153.37027  | 628.97509 | 3.31969  | 0.04190 | 688.43333 | 0.36048 |
| 4115 | 3195.23039 | 16.71561 | 7046.77343  | 311.85813 | 1.65655  | 0.10177 | 219.82210 | 0.63748 |
| 4116 | 4672.92455 | 18.87072 | 12278.99562 | 440.51218 | 5.32314  | 0.04755 | 541.91078 | 0.38524 |
| 4117 | 4680.11506 | 24.51106 | 8694.86375  | 475.98703 | 5.13594  | 0.06140 | 551.25752 | 0.97376 |
| 4118 | 4918.38436 | 10.74792 | 8903.20922  | 140.28734 | 1.34167  | 0.00506 | 162.39848 | 0.12052 |
| 4119 | 4451.85290 | 20.34005 | 16254.76830 | 509.34227 | 4.42992  | 0.01910 | 599.58680 | 0.28133 |
| 4120 | 3829.53257 | 11.86383 | 12007.67187 | 119.28092 | -1.60417 | 0.00322 | 94.73662  | 0.89139 |
| 4121 | 4976.15721 | 10.31249 | 9103.29261  | 268.08551 | 1.34331  | 0.00430 | 400.22329 | 0.16346 |
| 4122 | 4788.10731 | 16.65917 | 9850.57642  | 587.26355 | 0.10141  | 0.03807 | 779.55329 | 0.36351 |
| 4123 | 3739.58287 | 21.00293 | 13075.37306 | 99.19129  | 3.94529  | 0.01507 | 55.35910  | 0.93436 |
| 4124 | 3311.98339 | 20.84333 | 14310.22865 | 440.09955 | 2.30675  | 0.18419 | 369.89134 | 1.09536 |
| 4125 | 4239.69055 | 17.40167 | 7585.61416  | 563.75476 | -0.27839 | 0.02085 | 637.62845 | 0.52311 |
| 4126 | 4367.12840 | 18.79937 | 9615.29905  | 555.35622 | 3.06816  | 0.04201 | 632.68613 | 0.34233 |
| 4127 | 4267.17291 | 16.18653 | 7789.49043  | 794.77793 | 0.96208  | 0.04324 | 834.93523 | 0.47746 |
| 4128 | 4972.80522 | 7.24590  | 15923.59880 | 181.50616 | -1.12693 | 0.00174 | 258.75896 | 0.14470 |
| 4129 | 3386.61643 | 9.52878  | 6795.00413  | 418.17007 | 0.48929  | 0.05012 | 408.16885 | 0.61054 |
| 4130 | 4399.88470 | 15.29317 | 24734.13421 | 109.82912 | -1.86755 | 0.00036 | 97.51871  | 0.33421 |
| 4131 | 4911.07152 | 13.68930 | 8922.40881  | 405.03928 | 2.45028  | 0.01613 | 595.82304 | 0.22668 |
| 4132 | 3528.36520 | 16.73470 | 17021.50540 | 465.75637 | 1.82266  | 0.16673 | 421.04337 | 0.71130 |
| 4133 | 4367.00210 | 18.86447 | 9567.24123  | 472.01520 | 3.11953  | 0.04654 | 514.96884 | 0.40051 |
| 4134 | 4147.15088 | 16.42969 | 8956.44490  | 627.80274 | 0.79249  | 0.02151 | 696.74772 | 0.38176 |
| 4135 | 3754.75582 | 12.25110 | 6496.18535  | 300.32918 | -2.63261 | 0.01675 | 298.69088 | 0.39126 |
| 4136 | 4708.32189 | 15.77014 | 11398.16162 | 410.54735 | 5.37075  | 0.05592 | 534.83393 | 0.39873 |
| 4137 | 3539.45249 | 9.35519  | 7190.77743  | 711.00883 | 3.02544  | 0.04672 | 648.01219 | 0.57126 |
| 4138 | 4631.29500 | 22.27546 | 9839.54723  | 572.92317 | 0.80829  | 0.03924 | 727.74364 | 0.41710 |
| 4139 | 3506.88609 | 9.30858  | 8025.34526  | 412.89680 | -0.05977 | 0.03722 | 370.95894 | 0.43882 |
| 4140 | 4558.95434 | 20.52761 | 17125.18132 | 513.07769 | 4.49990  | 0.09879 | 646.77387 | 0.39441 |
| 4141 | 4079.52766 | 21.86782 | 8911.78301  | 755.25507 | 2.69858  | 0.02865 | 781.20912 | 0.49077 |
| 4142 | 4825.61952 | 20.86779 | 7803.95078  | 377.93720 | 4.51669  | 0.05089 | 441.87189 | 0.43160 |
| 4143 | 4246.36181 | 18.99293 | 7251.33812  | 546.61222 | 2.72169  | 0.04273 | 583.86213 | 0.44307 |
| 4144 | 4691.76537 | 15.39063 | 14162.95439 | 305.88884 | 4.56671  | 0.06378 | 418.29033 | 0.35016 |
| 4145 | 4416.89481 | 17.82124 | 7198.45293  | 562.06461 | 1.18807  | 0.03103 | 663.62903 | 0.42344 |
| 4146 | 4338.78648 | 18.68727 | 7855.28617  | 384.76183 | 7.41850  | 0.08031 | 474.66473 | 0.48411 |
| 4147 | 3135.32851 | 13.83479 | 8564.66573  | 657.26341 | 4.35855  | 0.32439 | 573.75887 | 0.79734 |
| 4148 | 4642.84030 | 20.11078 | 8001.88989  | 390.86436 | 3.91449  | 0.04343 | 540.40211 | 0.33236 |
| 4149 | 4604.90914 | 22.17194 | 10973.16898 | 346.78981 | 3.97719  | 0.07000 | 382.61757 | 0.59905 |
| 4150 | 4972.66397 | 8.58129  | 9518.30835  | 273.70147 | -0.40777 | 0.00318 | 406.31267 | 0.11558 |
| 4151 | 4895.47592 | 12.79760 | 7288.55777  | 449.49469 | 2.57031  | 0.04084 | 627.01855 | 0.30498 |
| 4152 | 4244.57149 | 24.67016 | 8302.33962  | 608.54203 | 1.92335  | 0.01797 | 684.34481 | 0.40942 |
| 4153 | 4057.17387 | 25.70897 | 8923.72115  | 814.26924 | 1.77502  | 0.01345 | 779.22130 | 0.43583 |
| 4154 | 4507.80358 | 21.03121 | 9973.92094  | 446.34623 | 5.14072  | 0.07728 | 521.60244 | 0.53375 |
| 4155 | 4770.16143 | 14.72890 | 11060.36321 | 376.70735 | 2.23016  | 0.01953 | 538.23439 | 0.38595 |
| 4156 | 2928.04902 | 25.05679 | 6943.94107  | 564.51957 | 6.32423  | 0.16947 | 304.45786 | 0.90969 |
| 4157 | 4825.48084 | 22.35379 | 10079.93097 | 684.08734 | 2.83740  | 0.02038 | 910.95483 | 0.26485 |
| 4158 | 4647.75668 | 22.37924 | 9669.88460  | 644.50612 | 2.58109  | 0.03534 | 815.85030 | 0.51471 |
| 4159 | 3992.48932 | 16.87246 | 5689.27100  | 424.09787 | -2.61337 | 0.02606 | 486.59524 | 0.80539 |
| 4160 | 2484.64762 | 26.35689 | 10781.94844 | 484.17258 | 8.20981  | 0.19819 | 208.29388 | 1.41772 |
| 4161 | 3380.21408 | 9.66311  | 6921.25845  | 450.31942 | 1.85055  | 0.05959 | 480.61469 | 0.55077 |
| 4162 | 4767.99343 | 18.37956 | 10679.36952 | 595.67476 | 2.67061  | 0.03431 | 746.48163 | 0.35452 |
| 4163 | 4758.33289 | 14.74234 | 11429.99568 | 496.61122 | 2.76872  | 0.02374 | 720.09749 | 0.32973 |
| 4164 | 4516.72686 | 21.22007 | 10052.21261 | 468.81766 | 5.49910  | 0.08900 | 560.67200 | 0.51588 |
| 4165 | 3379.06759 | 9.60967  | 6915.36802  | 524.24359 | 3.12423  | 0.06790 | 559.47780 | 0.53718 |
| 4166 | 4146.96922 | 16.37587 | 8959.66227  | 617.47746 | -1.96536 | 0.01884 | 684.26708 | 0.45003 |
| 4167 | 3672.24954 | 21.82187 | 12264.31677 | 132.89075 | 2.92431  | 0.01432 | 93.36254  | 0.70480 |
| 4168 | 4472.79737 | 20.46419 | 13668.76710 | 289.78765 | 6.92709  | 0.09505 | 303.91047 | 0.47904 |
| 4169 | 4442.20741 | 21.74103 | 7899.99459  | 537.30275 | 3.31421  | 0.03053 | 679.81099 | 0.32035 |
| 4170 | 4574.10660 | 8.59391  | 12354.56811 | 71.88287  | -3.73362 | 0.00054 | 64.79368  | 0.96373 |
| 4171 | 3214.05991 | 19.46503 | 13043.39662 | 456.61492 | 1.75903  | 0.16684 | 381.40267 | 0.70335 |
| 4172 | 5009.17698 | 10.09347 | 9275.46209  | 303.60833 | 1.97432  | 0.00489 | 459.74721 | 0.14782 |
| 4173 | 4239.87801 | 17.42597 | 7571.44914  | 795.94757 | 0.62950  | 0.02566 | 891.43322 | 0.44239 |
| 4174 | 4077.88878 | 21.81626 | 8895.26467  | 836.58111 | 2.52575  | 0.03776 | 812.90296 | 0.52906 |
| 4175 | 3377.68747 | 24.30831 | 11012.53530 | 927.43292 | 8.23084  | 0.20611 | 628.78950 | 1.98275 |
| 4176 | 4729.26120 | 21.64525 | 10094.44039 | 527.20690 | 3.71213  | 0.06880 | 671.03036 | 0.45213 |
| 4177 | 4787.14831 | 15.68473 | 7023.38920  | 371.89940 | 4.87784  | 0.01559 | 546.70539 | 0.19320 |
| 4178 | 4374.64623 | 18.79359 | 8553.95878  | 607.74831 | 2.60767  | 0.04499 | 656.67551 | 0.40062 |
| 4179 | 4819.61522 | 20.81540 | 7769.94529  | 646.28531 | 2.00497  | 0.05339 | 807.30457 | 0.43513 |
| 4180 | 4293.69097 | 15.02808 | 12163.79954 | 478.17458 | -2.40023 | 0.01733 | 569.24547 | 0.38188 |
| 4181 | 4794.17127 | 10.34515 | 11106.00783 | 554.13773 | 0.97779  | 0.02927 | 698.55974 | 0.44729 |
| 4182 | 4424.14872 | 17.00513 | 10300.82338 | 267.43140 | 5.10084  | 0.06904 | 318.46234 | 0.61373 |
| 4183 | 4226.50333 | 18.89152 | 6824.35928  | 741.34674 | 3.41846  | 0.05645 | 758.33550 | 0.43958 |

|      |            |          |             |           |          |         |           |         |
|------|------------|----------|-------------|-----------|----------|---------|-----------|---------|
| 4184 | 4932.72519 | 7.08177  | 16564.39167 | 132.21030 | -1.83687 | 0.00207 | 167.42517 | 0.19031 |
| 4185 | 3533.31840 | 15.23435 | 11899.81190 | 363.55775 | 0.52833  | 0.06891 | 288.64728 | 0.57557 |
| 4186 | 4875.83855 | 7.73278  | 9859.71289  | 471.39109 | 1.64783  | 0.01180 | 648.57001 | 0.20484 |
| 4187 | 4783.90988 | 15.47966 | 7003.31191  | 472.30819 | 1.47611  | 0.01419 | 683.87658 | 0.21919 |
| 4188 | 4423.64494 | 11.43125 | 8383.62092  | 537.34836 | -2.13880 | 0.01095 | 662.06742 | 0.28668 |
| 4189 | 4374.58207 | 20.37747 | 9976.96729  | 596.49083 | 3.02403  | 0.04160 | 676.26967 | 0.42961 |
| 4190 | 3736.15055 | 11.59222 | 8740.96819  | 541.13981 | 1.19578  | 0.02516 | 498.87176 | 0.62554 |
| 4191 | 3379.53963 | 24.41455 | 11950.82473 | 508.46547 | 3.74575  | 0.06153 | 410.33057 | 0.52401 |
| 4192 | 2911.62709 | 17.00038 | 14633.96958 | 318.56022 | 3.80927  | 0.23041 | 252.89670 | 0.71668 |
| 4193 | 3741.29545 | 11.72634 | 7564.19113  | 839.34498 | 2.54922  | 0.02351 | 817.22122 | 0.51184 |
| 4194 | 3226.38308 | 19.42334 | 13251.42274 | 459.74815 | 3.22032  | 0.19386 | 406.54766 | 0.75867 |
| 4195 | 4420.25571 | 17.91886 | 7194.69140  | 490.87678 | 1.30895  | 0.03352 | 565.97096 | 0.31935 |
| 4196 | 4954.71565 | 6.65945  | 10975.22942 | 326.96785 | -3.71626 | 0.00630 | 455.21363 | 0.21325 |
| 4197 | 4333.27818 | 18.58888 | 7798.02516  | 345.74164 | 6.75710  | 0.08848 | 380.55833 | 0.46651 |
| 4198 | 4408.13138 | 15.44615 | 24901.31820 | 97.22630  | -2.98163 | 0.00038 | 74.04012  | 0.34904 |
| 4199 | 4968.32065 | 9.87592  | 8848.47869  | 322.77822 | 0.58276  | 0.00761 | 447.32314 | 0.14959 |
| 4200 | 4629.21772 | 7.72790  | 16340.74897 | 120.54569 | -0.87822 | 0.00003 | 145.65789 | 0.07981 |
| 4201 | 4790.42827 | 10.24651 | 11223.44801 | 492.86044 | 0.24166  | 0.02577 | 632.31482 | 0.42965 |
| 4202 | 4894.43374 | 9.49139  | 10173.49172 | 536.35116 | -0.61348 | 0.02638 | 704.61667 | 0.33950 |
| 4203 | 4944.94138 | 13.14769 | 9375.99020  | 452.30445 | 1.58185  | 0.00970 | 679.08321 | 0.18980 |
| 4204 | 3612.09308 | 13.25047 | 20623.93953 | 257.96659 | 0.97189  | 0.01668 | 329.72265 | 0.24852 |
| 4205 | 3857.00237 | 23.88235 | 12068.42575 | 904.07991 | 6.63806  | 0.02180 | 903.81883 | 0.06773 |
| 4206 | 3910.83825 | 13.57474 | 11161.75480 | 294.74033 | -0.88672 | 0.03065 | 292.58124 | 0.50331 |
| 4207 | 4339.83484 | 17.15555 | 8218.26978  | 733.46870 | 3.06818  | 0.03866 | 793.51941 | 0.38247 |
| 4208 | 4692.00031 | 18.29431 | 16768.04520 | 447.32651 | 4.62891  | 0.03026 | 574.28711 | 0.17444 |
| 4209 | 5019.73119 | 13.79335 | 8422.28691  | 313.11802 | 2.45690  | 0.01654 | 457.74248 | 0.20752 |
| 4210 | 3841.05122 | 20.23138 | 6346.93829  | 709.36666 | 2.19905  | 0.02463 | 725.93567 | 0.50614 |
| 4211 | 4837.46287 | 15.70931 | 8440.34174  | 445.34845 | 3.48811  | 0.02622 | 654.26592 | 0.24777 |
| 4212 | 4785.00389 | 15.63979 | 7000.98912  | 449.92273 | 2.90078  | 0.01570 | 657.71979 | 0.19239 |
| 4213 | 4967.16818 | 10.92384 | 10211.70272 | 88.34256  | -0.26971 | 0.00277 | 83.85063  | 0.30595 |
| 4214 | 4690.07384 | 13.52305 | 9678.28818  | 378.50131 | 2.03059  | 0.01998 | 448.42528 | 0.24189 |
| 4215 | 4163.47012 | 12.70660 | 12823.86041 | 198.70717 | -1.54687 | 0.00577 | 244.98167 | 0.15820 |
| 4216 | 4792.51578 | 15.79753 | 7089.59252  | 444.94956 | 3.01062  | 0.01447 | 655.47464 | 0.20680 |
| 4217 | 4836.79099 | 9.91149  | 7107.95702  | 146.53945 | 1.26228  | 0.00552 | 176.30693 | 0.27611 |
| 4218 | 4464.65477 | 21.77086 | 7681.63244  | 573.61355 | 2.84288  | 0.02895 | 743.60099 | 0.31999 |
| 4219 | 4412.26242 | 17.91918 | 7007.79784  | 627.53900 | 2.85999  | 0.03290 | 668.90798 | 0.47038 |
| 4220 | 2780.55887 | 14.53062 | 13334.38331 | 294.78872 | 5.24809  | 0.23896 | 165.46439 | 0.79255 |
| 4221 | 5074.36870 | 13.17266 | 9875.63181  | 113.42793 | 0.09554  | 0.00131 | 133.97035 | 0.32224 |
| 4222 | 3503.54945 | 15.34621 | 11527.86899 | 482.74158 | 2.73191  | 0.10903 | 435.46935 | 0.57151 |
| 4223 | 4844.71661 | 15.30335 | 9379.67337  | 411.53563 | 2.47486  | 0.02455 | 597.27492 | 0.30913 |
| 4224 | 4425.49738 | 17.34473 | 10713.28596 | 754.87097 | 2.08985  | 0.03602 | 814.90653 | 0.36593 |
| 4225 | 4005.69086 | 9.89683  | 9387.16180  | 330.27660 | -1.75960 | 0.00781 | 388.39586 | 0.17920 |
| 4226 | 3122.76447 | 16.46160 | 9364.48100  | 544.42461 | 3.92061  | 0.19541 | 462.91500 | 0.66375 |
| 4227 | 4975.41062 | 10.28655 | 9095.22824  | 280.67096 | 2.17105  | 0.00442 | 420.70834 | 0.17431 |
| 4228 | 4077.43166 | 21.81708 | 8923.48166  | 852.23805 | 2.76421  | 0.03882 | 834.75020 | 0.50336 |
| 4229 | 4688.22188 | 13.54375 | 9671.04419  | 405.75827 | 1.28508  | 0.02039 | 491.06964 | 0.23096 |
| 4230 | 4496.44062 | 12.61559 | 9338.00784  | 659.80220 | -1.00930 | 0.02467 | 771.55346 | 0.23932 |
| 4231 | 3132.28999 | 15.60450 | 6674.83915  | 365.71234 | 2.47347  | 0.01516 | 313.86866 | 0.28231 |
| 4232 | 4031.31528 | 9.37550  | 11932.60014 | 207.23966 | -2.65575 | 0.00358 | 238.87582 | 0.21877 |
| 4233 | 3792.15253 | 20.08317 | 11695.99796 | 436.25062 | -1.32587 | 0.07827 | 429.85598 | 0.88809 |
| 4234 | 4347.64311 | 23.78246 | 10445.40562 | 663.34451 | 2.99795  | 0.02891 | 708.03926 | 0.57021 |
| 4235 | 3618.82703 | 25.28343 | 9550.04159  | 102.90564 | 3.49560  | 0.00906 | 54.55489  | 1.17837 |
| 4236 | 4684.76325 | 7.58443  | 19838.70243 | 77.78099  | -4.50655 | 0.00000 | 66.36065  | 0.28512 |
| 4237 | 4789.84480 | 15.73861 | 7067.20020  | 439.41271 | 2.98203  | 0.01505 | 654.17736 | 0.21217 |
| 4238 | 4767.53541 | 8.09958  | 9402.00165  | 405.36851 | -3.20216 | 0.00319 | 586.01115 | 0.07817 |
| 4239 | 5125.90698 | 10.30370 | 9328.82339  | 61.22983  | -4.39253 | 0.00063 | 42.31937  | 0.76724 |
| 4240 | 4747.73905 | 15.99683 | 20943.49930 | 422.43060 | 4.09534  | 0.05993 | 579.05574 | 0.64374 |
| 4241 | 4256.17330 | 23.34174 | 12457.86159 | 611.58536 | 4.39428  | 0.01017 | 737.51042 | 0.12339 |
| 4242 | 5025.73327 | 18.30634 | 10074.34946 | 417.59264 | 2.19771  | 0.01730 | 600.23526 | 0.24837 |
| 4243 | 4930.70005 | 7.63147  | 9086.87368  | 317.26542 | -0.84934 | 0.00048 | 470.05222 | 0.03310 |
| 4244 | 4467.40595 | 20.39880 | 13571.78906 | 406.92281 | 7.08889  | 0.07184 | 494.46497 | 0.47880 |
| 4245 | 4883.78020 | 19.79346 | 11116.11912 | 353.80942 | 3.28435  | 0.06787 | 486.17206 | 0.39431 |
| 4246 | 4420.18664 | 17.91349 | 7195.78890  | 563.17455 | 1.37461  | 0.03575 | 680.61398 | 0.32420 |
| 4247 | 4952.12425 | 10.76818 | 10054.89362 | 137.07943 | 1.98301  | 0.00368 | 170.90917 | 0.24405 |
| 4248 | 4238.33739 | 17.45618 | 7559.57897  | 622.58588 | 1.65183  | 0.02760 | 700.64834 | 0.45326 |
| 4249 | 3831.85972 | 15.80151 | 8603.78805  | 691.08458 | 2.26314  | 0.03754 | 647.50973 | 0.54616 |
| 4250 | 4844.53438 | 12.70726 | 16848.52684 | 278.81592 | 4.28062  | 0.02487 | 377.24214 | 0.29537 |
| 4251 | 3805.88215 | 25.39326 | 6679.21184  | 79.62645  | 3.44512  | 0.00653 | 28.73553  | 1.50212 |
| 4252 | 3577.19075 | 13.34217 | 5257.76854  | 563.62861 | 1.67518  | 0.04175 | 525.44760 | 0.72569 |
| 4253 | 4844.36217 | 15.29519 | 9372.04705  | 309.40639 | 2.34490  | 0.02378 | 443.95958 | 0.31547 |
| 4254 | 3835.07537 | 20.21201 | 6299.97516  | 653.29216 | 3.13646  | 0.02846 | 641.85492 | 0.35984 |



|      |            |          |             |           |          |         |           |         |
|------|------------|----------|-------------|-----------|----------|---------|-----------|---------|
| 4255 | 5074.26250 | 13.15777 | 10073.25943 | 105.98397 | -1.59424 | 0.00109 | 125.72698 | 0.37888 |
| 4256 | 4146.80750 | 16.37229 | 9050.76688  | 665.01524 | -1.67626 | 0.01868 | 737.86103 | 0.46821 |
| 4257 | 3130.59057 | 18.12267 | 10239.87505 | 475.78370 | 4.35494  | 0.19118 | 451.85117 | 0.87753 |
| 4258 | 4449.89163 | 20.08369 | 13448.39036 | 454.37392 | 7.33688  | 0.10626 | 542.69401 | 0.32442 |
| 4259 | 4657.10024 | 19.51075 | 12292.86088 | 439.92129 | 4.33134  | 0.10816 | 589.67493 | 0.42572 |
| 4260 | 3248.85151 | 19.85981 | 13766.23318 | 367.16021 | 1.68624  | 0.18731 | 322.43321 | 0.94213 |
| 4261 | 4504.65651 | 16.56309 | 8545.76928  | 511.51498 | 0.18625  | 0.02863 | 603.84060 | 0.30300 |
| 4262 | 4366.67709 | 18.85688 | 9569.65146  | 404.68486 | 3.24418  | 0.04745 | 437.82642 | 0.39509 |
| 4263 | 4824.66652 | 20.84782 | 7836.41183  | 624.47871 | 2.79593  | 0.06274 | 770.88140 | 0.37006 |
| 4264 | 4820.28456 | 22.40480 | 11786.46184 | 565.20121 | 3.27203  | 0.01554 | 749.91713 | 0.27828 |
| 4265 | 4976.56612 | 23.09388 | 10175.38860 | 491.45146 | 2.36474  | 0.04579 | 569.36610 | 0.79136 |
| 4266 | 4420.18664 | 17.91349 | 7195.78890  | 563.17455 | 1.37461  | 0.03575 | 680.61398 | 0.32420 |
| 4267 | 4282.10023 | 17.71484 | 7478.63664  | 688.27720 | 3.71585  | 0.04229 | 701.01988 | 0.50305 |
| 4268 | 3540.94327 | 17.34146 | 8065.07572  | 423.57481 | -1.08636 | 0.04079 | 429.58919 | 0.61930 |
| 4269 | 4743.07346 | 21.75203 | 10196.39780 | 541.56479 | 3.53077  | 0.07467 | 691.59229 | 0.43378 |
| 4270 | 3832.09883 | 15.77426 | 8629.35587  | 746.16614 | 2.28747  | 0.03509 | 760.74339 | 0.52273 |
| 4271 | 5113.72492 | 10.98425 | 16248.12193 | 115.16121 | -0.21293 | 0.00206 | 134.93789 | 0.15657 |
| 4272 | 4293.50697 | 15.22095 | 12176.87919 | 542.17586 | 0.53896  | 0.02346 | 650.78863 | 0.25122 |
| 4273 | 4423.90170 | 17.33950 | 10713.07705 | 724.51379 | 2.79569  | 0.03692 | 783.10137 | 0.36651 |
| 4274 | 4534.69421 | 20.23065 | 24728.07748 | 380.40515 | 5.98531  | 0.09220 | 476.92443 | 0.38699 |
| 4275 | 5023.62580 | 18.26176 | 9246.34098  | 352.05200 | 3.18217  | 0.01599 | 511.30785 | 0.25469 |
| 4276 | 4523.59374 | 20.93838 | 15206.96026 | 510.63759 | 3.94423  | 0.01390 | 641.45290 | 0.25301 |
| 4277 | 3832.73830 | 15.80096 | 8628.91018  | 653.57515 | 2.52343  | 0.03503 | 606.70381 | 0.54883 |
| 4278 | 4683.13536 | 15.14061 | 10805.46576 | 42.04780  | -2.27135 | 0.00153 | 16.68315  | 1.06475 |
| 4279 | 4515.53930 | 20.92567 | 11709.49215 | 757.26994 | 3.72501  | 0.01438 | 914.47812 | 0.23317 |
| 4280 | 3851.27991 | 23.87604 | 12057.75481 | 666.32759 | 7.22057  | 0.01800 | 711.52256 | 0.06561 |
| 4281 | 3180.54946 | 15.84042 | 12261.32394 | 401.29525 | 3.11307  | 0.10423 | 340.64584 | 0.79261 |
| 4282 | 4958.17114 | 6.64993  | 9991.66370  | 406.05201 | -2.53356 | 0.00727 | 590.58746 | 0.18754 |
| 4283 | 4606.82395 | 18.93924 | 8434.84959  | 496.45125 | 4.63613  | 0.03880 | 643.44418 | 0.31410 |
| 4284 | 4068.92389 | 25.71731 | 8936.04061  | 782.16046 | 2.14987  | 0.01200 | 813.18964 | 0.43688 |
| 4285 | 4606.13870 | 22.28714 | 8635.27390  | 591.19065 | 2.49211  | 0.04042 | 735.39606 | 0.33954 |
| 4286 | 4737.88504 | 15.91613 | 12186.07358 | 333.91545 | 2.58638  | 0.04799 | 454.69709 | 0.42764 |
| 4287 | 4748.70781 | 14.78869 | 9627.48875  | 410.62856 | 2.82807  | 0.05647 | 568.51121 | 0.68027 |
| 4288 | 4180.71941 | 23.76496 | 8398.77370  | 796.91126 | 3.03986  | 0.06291 | 904.37450 | 0.58345 |
| 4289 | 4552.40094 | 17.75378 | 8382.99605  | 528.35899 | 1.41300  | 0.02596 | 694.61660 | 0.29931 |
| 4290 | 4720.31845 | 19.30609 | 9894.81376  | 652.87731 | 0.47617  | 0.04008 | 855.21694 | 0.28445 |
| 4291 | 4251.97853 | 18.98709 | 7171.49285  | 740.37097 | 2.82476  | 0.03776 | 805.28364 | 0.45627 |
| 4292 | 4724.33432 | 21.58222 | 10066.48990 | 498.33870 | 4.08446  | 0.06450 | 624.39959 | 0.45237 |
| 4293 | 4500.48099 | 22.58489 | 7586.18143  | 567.09480 | 5.17787  | 0.14788 | 667.78942 | 0.73862 |
| 4294 | 4969.14722 | 17.23534 | 7939.98402  | 680.67142 | 0.56467  | 0.01744 | 884.41264 | 0.30551 |
| 4295 | 3756.96721 | 12.49187 | 6503.75286  | 336.66096 | -2.09091 | 0.01343 | 334.28275 | 0.41390 |
| 4296 | 4837.42070 | 15.70605 | 8438.99812  | 370.63616 | 4.64251  | 0.03229 | 550.98521 | 0.20948 |
| 4297 | 4977.63883 | 17.57395 | 8069.62200  | 633.61914 | 1.50531  | 0.02047 | 831.51994 | 0.31282 |
| 4298 | 3380.21658 | 24.41732 | 11964.01090 | 644.52754 | 4.09606  | 0.06094 | 557.91068 | 0.52518 |
| 4299 | 4954.13195 | 7.17063  | 9229.43978  | 291.21453 | -5.56103 | 0.00027 | 423.55538 | 0.03418 |
| 4300 | 5117.45488 | 10.93371 | 10225.14817 | 68.22284  | -3.87818 | 0.00078 | 55.64146  | 0.72838 |
| 4301 | 4619.60784 | 18.70036 | 8508.19349  | 433.62125 | 4.61880  | 0.02852 | 549.39621 | 0.37773 |
| 4302 | 4709.85907 | 11.01767 | 15931.95479 | 89.36705  | 4.09348  | 0.00491 | 71.26004  | 0.18956 |
| 4303 | 4449.91329 | 19.58067 | 5686.22557  | 566.64913 | 2.72106  | 0.03087 | 642.10185 | 0.44629 |
| 4304 | 3185.79365 | 18.30284 | 10618.45020 | 432.84972 | 3.05065  | 0.17855 | 393.01029 | 0.80654 |
| 4305 | 4410.87674 | 17.94068 | 7009.62327  | 663.83208 | 1.39720  | 0.03284 | 743.86861 | 0.46709 |
| 4306 | 4803.54877 | 22.30010 | 9963.20663  | 642.78703 | 5.04736  | 0.02157 | 844.88927 | 0.25777 |
| 4307 | 4462.77503 | 21.72586 | 8024.92587  | 660.94476 | 3.08351  | 0.02887 | 838.10933 | 0.37501 |
| 4308 | 4573.99082 | 7.87970  | 8886.47219  | 318.68143 | -3.64563 | 0.00567 | 430.00869 | 0.16080 |
| 4309 | 4237.57725 | 17.69306 | 13918.13760 | 75.18413  | 0.89036  | 0.00657 | 33.15800  | 1.24643 |
| 4310 | 5089.41769 | 10.04542 | 16514.41321 | 102.50604 | -0.50082 | 0.00213 | 109.85630 | 0.24463 |
| 4311 | 4606.15648 | 22.27751 | 8637.47862  | 680.53023 | 1.83638  | 0.03846 | 839.84501 | 0.42332 |
| 4312 | 3217.54526 | 16.53693 | 12197.97950 | 446.77470 | 1.79189  | 0.08736 | 414.25322 | 0.75556 |
| 4313 | 3669.19575 | 14.09290 | 9915.67438  | 530.03363 | 2.13108  | 0.07725 | 497.56594 | 0.64558 |
| 4314 | 2560.17862 | 15.07160 | 4165.58548  | 489.87149 | 5.28220  | 0.27634 | 505.20409 | 1.32833 |
| 4315 | 3385.00848 | 20.14428 | 9779.14280  | 112.64141 | 4.44161  | 0.01655 | 75.71925  | 1.02647 |
| 4316 | 3539.36558 | 9.35951  | 7246.52413  | 557.64643 | 2.49489  | 0.04686 | 465.60394 | 0.59449 |
| 4317 | 3506.06868 | 9.30954  | 7985.33395  | 387.88463 | -0.12477 | 0.03717 | 313.12920 | 0.41945 |
| 4318 | 4762.91977 | 18.34314 | 10581.79750 | 669.45690 | 1.58712  | 0.04757 | 841.31263 | 0.31330 |
| 4319 | 3393.79068 | 11.71488 | 7569.77684  | 448.40836 | 2.04707  | 0.09062 | 310.88522 | 0.72565 |
| 4320 | 4768.08793 | 18.36485 | 10674.92762 | 523.88215 | 2.31548  | 0.03610 | 657.94265 | 0.37685 |
| 4321 | 5008.75011 | 10.08705 | 9141.52441  | 276.15668 | 1.06414  | 0.00450 | 403.40442 | 0.14775 |
| 4322 | 4710.38408 | 15.80076 | 11082.69883 | 513.33203 | 4.02302  | 0.05786 | 670.13795 | 0.30709 |
| 4323 | 3137.87715 | 15.59722 | 6735.13816  | 315.97019 | 1.53095  | 0.01678 | 267.06769 | 0.18202 |
| 4324 | 4194.82495 | 23.77420 | 8435.19807  | 709.34837 | 2.07432  | 0.05313 | 797.02039 | 0.59260 |
| 4325 | 2554.06434 | 26.40748 | 11215.31583 | 809.21861 | 8.80610  | 0.17684 | 489.83089 | 1.33405 |

|      |            |          |             |            |          |         |            |         |
|------|------------|----------|-------------|------------|----------|---------|------------|---------|
| 4326 | 4289.97654 | 18.11256 | 6891.15226  | 697.80714  | 1.72852  | 0.05569 | 742.93511  | 0.42869 |
| 4327 | 3475.52965 | 13.92017 | 7300.93734  | 525.43599  | 1.97681  | 0.05834 | 491.92402  | 0.59014 |
| 4328 | 4899.29543 | 16.87250 | 8796.96096  | 410.94201  | 3.14346  | 0.04579 | 534.96912  | 0.42691 |
| 4329 | 3736.08024 | 11.51814 | 8789.96233  | 545.37137  | -0.16769 | 0.03044 | 529.78805  | 0.61385 |
| 4330 | 4423.42384 | 11.43010 | 8405.32233  | 501.84006  | -2.58819 | 0.01082 | 613.28288  | 0.27050 |
| 4331 | 4885.62713 | 9.31714  | 12500.19951 | 503.40611  | 2.22607  | 0.01825 | 735.40547  | 0.27345 |
| 4332 | 4457.46727 | 19.57652 | 5716.78628  | 660.43373  | 3.23207  | 0.03873 | 779.00728  | 0.41149 |
| 4333 | 4298.92717 | 15.22460 | 12135.38641 | 548.98797  | -0.44757 | 0.01809 | 663.33482  | 0.32082 |
| 4334 | 4576.28693 | 10.21276 | 9304.30975  | 348.47235  | -3.44980 | 0.01911 | 430.37301  | 0.35501 |
| 4335 | 3670.84451 | 14.07978 | 9967.15197  | 533.70033  | 1.36193  | 0.07032 | 548.15832  | 0.65738 |
| 4336 | 3736.16920 | 11.52577 | 8788.93674  | 483.68364  | -0.27010 | 0.03134 | 450.80364  | 0.60834 |
| 4337 | 4932.60684 | 7.61285  | 9905.88427  | 326.29685  | -4.08251 | 0.00022 | 493.83222  | 0.03289 |
| 4338 | 3568.54333 | 17.61823 | 7373.97905  | 438.27043  | 0.07175  | 0.08740 | 437.82671  | 0.82566 |
| 4339 | 4967.42151 | 9.86034  | 8851.38987  | 308.76614  | 1.23261  | 0.00740 | 429.46945  | 0.16511 |
| 4340 | 4851.37426 | 15.83576 | 8853.66389  | 422.49872  | 3.50514  | 0.02941 | 627.63577  | 0.25535 |
| 4341 | 4336.53548 | 16.10518 | 9316.65072  | 435.07973  | 5.80916  | 0.10229 | 587.68562  | 0.43666 |
| 4342 | 4573.02907 | 7.61903  | 8702.78400  | 363.00565  | -2.80476 | 0.00416 | 503.06312  | 0.06803 |
| 4343 | 4035.13472 | 20.84082 | 14591.61635 | 134.13717  | 3.50629  | 0.01176 | 128.06245  | 0.54829 |
| 4344 | 4399.64426 | 6.56821  | 8084.79297  | 391.68764  | -0.50017 | 0.00290 | 504.44544  | 0.06579 |
| 4345 | 3770.39962 | 9.64955  | 8354.58986  | 568.89860  | 0.67214  | 0.05265 | 568.70093  | 0.57521 |
| 4346 | 4970.96262 | 10.94176 | 10234.15616 | 81.52005   | 1.57885  | 0.00290 | 70.87062   | 0.34922 |
| 4347 | 4846.27387 | 13.58693 | 12135.12338 | 577.97016  | 2.01011  | 0.03490 | 737.57447  | 0.44717 |
| 4348 | 4349.81964 | 23.79194 | 10470.04896 | 796.63846  | 4.73212  | 0.03892 | 808.45872  | 0.55213 |
| 4349 | 4415.11758 | 15.24805 | 23744.29188 | 80.65163   | -2.13782 | 0.00052 | 46.44527   | 0.28925 |
| 4350 | 5012.16887 | 6.80982  | 9326.62132  | 281.18638  | -1.60443 | 0.00112 | 429.76166  | 0.03369 |
| 4351 | 4766.46070 | 18.40540 | 10653.51508 | 576.40553  | 1.93740  | 0.04551 | 734.12928  | 0.31789 |
| 4352 | 4893.58350 | 9.45455  | 10018.13951 | 626.69889  | -0.76130 | 0.02521 | 834.52667  | 0.40602 |
| 4353 | 5023.74594 | 18.25263 | 10109.18534 | 419.59729  | 2.28944  | 0.01715 | 601.88489  | 0.24521 |
| 4354 | 4281.25253 | 14.22183 | 6827.17577  | 586.38583  | -1.38905 | 0.02545 | 675.58375  | 0.35459 |
| 4355 | 4615.56059 | 7.81765  | 16730.25056 | 145.43737  | -3.58479 | 0.00002 | 199.65358  | 0.11513 |
| 4356 | 4442.13709 | 21.74452 | 7598.48309  | 506.65086  | 1.45225  | 0.03150 | 639.63439  | 0.31216 |
| 4357 | 4659.25051 | 19.55183 | 12690.69911 | 395.22641  | 4.28612  | 0.09640 | 531.24807  | 0.49028 |
| 4358 | 4417.32689 | 17.81094 | 7203.31762  | 594.57873  | 1.01820  | 0.03037 | 702.51328  | 0.45025 |
| 4359 | 4748.05009 | 14.79256 | 9632.61381  | 328.28201  | 3.14971  | 0.05456 | 445.04763  | 0.58113 |
| 4360 | 4564.20979 | 20.62918 | 17823.34932 | 404.32176  | 5.93292  | 0.08447 | 495.69651  | 0.46921 |
| 4361 | 4247.96036 | 18.97107 | 7138.52948  | 810.48997  | 2.80689  | 0.04390 | 871.28185  | 0.40014 |
| 4362 | 4290.11784 | 11.00388 | 10582.25794 | 123.74285  | -2.57676 | 0.00034 | 134.71947  | 0.77775 |
| 4363 | 4424.84938 | 22.70231 | 8494.61814  | 632.85902  | 2.73976  | 0.01537 | 842.39007  | 0.23537 |
| 4364 | 4031.72997 | 25.76566 | 8812.61305  | 1055.43009 | 3.90747  | 0.01711 | 1039.63980 | 0.43699 |
| 4365 | 4131.31246 | 12.41518 | 12010.87731 | 218.67466  | -1.38423 | 0.00519 | 257.95924  | 0.33701 |
| 4366 | 4341.08830 | 23.78298 | 10418.20569 | 871.06608  | 3.55661  | 0.02893 | 912.07734  | 0.57556 |
| 4367 | 4558.95434 | 20.52761 | 17125.18132 | 513.07769  | 4.49990  | 0.09879 | 646.77387  | 0.39441 |
| 4368 | 4432.06139 | 15.53976 | 6481.55845  | 636.89011  | 3.28597  | 0.02571 | 711.35037  | 0.35308 |
| 4369 | 5019.66322 | 13.79516 | 8419.95571  | 340.36754  | 1.88421  | 0.01655 | 507.95927  | 0.20066 |
| 4370 | 4957.60848 | 6.62733  | 10225.71471 | 417.23325  | -2.71780 | 0.00599 | 604.04605  | 0.20668 |
| 4371 | 4779.19972 | 10.38752 | 11752.68120 | 428.48012  | -0.63357 | 0.00894 | 557.95523  | 0.11818 |
| 4372 | 4567.01432 | 13.91936 | 21143.93915 | 65.27774   | -4.05056 | 0.00005 | 32.51618   | 0.57036 |
| 4373 | 4369.52741 | 18.86405 | 9572.92574  | 463.23362  | 3.20655  | 0.05364 | 518.02965  | 0.33221 |
| 4374 | 4445.58365 | 20.42596 | 16184.87845 | 745.37478  | 3.40348  | 0.01538 | 903.88603  | 0.23897 |
| 4375 | 4236.38116 | 24.70571 | 8284.85125  | 747.20214  | 1.70989  | 0.01955 | 861.06182  | 0.38477 |
| 4376 | 4464.25953 | 20.37888 | 10310.05522 | 873.28442  | 3.70596  | 0.01936 | 1030.41452 | 0.30295 |
| 4377 | 4339.25217 | 16.15495 | 9357.75230  | 585.97945  | 5.23538  | 0.10264 | 806.45475  | 0.43496 |
| 4378 | 5008.64202 | 10.08459 | 9140.54983  | 318.60648  | 0.13269  | 0.00464 | 474.57655  | 0.14202 |
| 4379 | 4805.78356 | 22.30935 | 11462.62589 | 622.10254  | 3.54044  | 0.01520 | 805.43112  | 0.27038 |
| 4380 | 3385.40405 | 24.43844 | 12001.27296 | 516.73877  | 2.95843  | 0.05690 | 417.09890  | 0.64724 |
| 4381 | 4090.18472 | 18.97506 | 6760.05877  | 681.04714  | 3.85582  | 0.06363 | 673.08929  | 0.61752 |
| 4382 | 2995.63694 | 24.94184 | 7129.67953  | 466.24389  | 5.76637  | 0.15624 | 247.26345  | 1.02185 |
| 4383 | 5116.78334 | 11.28095 | 12920.56117 | 56.62608   | -0.80885 | 0.00051 | 34.86582   | 0.47266 |
| 4384 | 4432.38898 | 15.51221 | 6380.09581  | 691.85796  | 3.61045  | 0.02957 | 753.97812  | 0.35081 |
| 4385 | 4418.36373 | 22.64463 | 8510.64886  | 614.02020  | 3.48127  | 0.01557 | 816.79143  | 0.28937 |
| 4386 | 4007.86690 | 9.36737  | 8982.15783  | 269.29855  | -3.33773 | 0.00637 | 310.62263  | 0.22881 |
| 4387 | 3610.10798 | 13.22942 | 20578.26835 | 342.39884  | 0.86924  | 0.01754 | 436.64247  | 0.26110 |
| 4388 | 4381.00400 | 18.73725 | 8621.59425  | 478.95809  | 0.59480  | 0.03983 | 505.22187  | 0.37484 |
| 4389 | 3388.74506 | 17.98663 | 19459.77887 | 392.13390  | 1.43705  | 0.08199 | 328.19004  | 0.68704 |
| 4390 | 4688.76215 | 18.30460 | 16783.13332 | 466.57002  | 3.92702  | 0.03083 | 633.49121  | 0.17187 |
| 4391 | 4785.86651 | 22.27002 | 10675.02586 | 479.70849  | 3.43498  | 0.04910 | 605.28815  | 0.51820 |
| 4392 | 4693.90692 | 13.61583 | 9922.19390  | 364.24488  | 4.34072  | 0.02286 | 435.09878  | 0.21728 |
| 4393 | 4461.05292 | 21.71611 | 8023.72750  | 532.99602  | 2.82369  | 0.03028 | 684.65561  | 0.36133 |
| 4394 | 2968.70750 | 24.89375 | 6812.26434  | 497.80729  | 5.53784  | 0.16638 | 247.47848  | 1.01207 |
| 4395 | 3795.66806 | 25.25522 | 6667.47533  | 77.26955   | 4.54751  | 0.00684 | 31.46946   | 1.41290 |
| 4396 | 4337.13810 | 19.38311 | 6373.88401  | 613.65846  | 2.36132  | 0.05715 | 672.74160  | 0.39401 |

|      |            |          |             |            |          |         |            |         |
|------|------------|----------|-------------|------------|----------|---------|------------|---------|
| 4397 | 3540.56238 | 17.39697 | 8010.70191  | 400.41682  | -0.04183 | 0.06002 | 392.05982  | 0.51762 |
| 4398 | 3424.73954 | 19.73107 | 18006.54696 | 266.12240  | 1.00639  | 0.12775 | 180.87473  | 0.72581 |
| 4399 | 3247.72232 | 19.83847 | 13342.62773 | 480.42309  | 1.97485  | 0.18004 | 452.75577  | 0.91757 |
| 4400 | 2566.70258 | 15.48973 | 10788.77653 | 391.75306  | 5.27665  | 0.29083 | 331.33930  | 0.71950 |
| 4401 | 4693.91115 | 13.45460 | 9650.13516  | 378.76054  | 2.30480  | 0.01934 | 447.27853  | 0.23320 |
| 4402 | 3176.90872 | 15.81374 | 12241.67827 | 511.21062  | 3.67311  | 0.11837 | 439.62604  | 0.56264 |
| 4403 | 4006.87354 | 9.90529  | 9403.38977  | 313.82374  | -2.12966 | 0.00959 | 388.84326  | 0.17721 |
| 4404 | 3773.33470 | 12.03595 | 9410.68966  | 680.33160  | 1.02192  | 0.03285 | 684.23904  | 0.53090 |
| 4405 | 4845.18767 | 9.00395  | 9467.75222  | 95.47806   | -1.01020 | 0.00374 | 76.67865   | 0.75015 |
| 4406 | 4909.54571 | 13.65925 | 8902.90706  | 493.64827  | 1.91647  | 0.01638 | 722.45586  | 0.21957 |
| 4407 | 4781.16077 | 10.46930 | 11864.91517 | 511.84300  | -2.29583 | 0.00826 | 688.51113  | 0.11772 |
| 4408 | 2911.96826 | 15.87245 | 15892.52341 | 399.70391  | 3.85791  | 0.22330 | 352.65928  | 0.85167 |
| 4409 | 3692.65162 | 14.12786 | 10407.49258 | 415.95363  | -0.40714 | 0.05248 | 392.05939  | 0.67588 |
| 4410 | 5013.91911 | 6.85077  | 8892.68299  | 289.86148  | 0.40432  | 0.00133 | 434.71489  | 0.03186 |
| 4411 | 4687.24684 | 13.63257 | 9893.22081  | 404.29811  | 4.82320  | 0.02330 | 496.16587  | 0.20545 |
| 4412 | 4267.58811 | 16.19997 | 7800.80182  | 702.57399  | 0.84857  | 0.04227 | 773.33294  | 0.48528 |
| 4413 | 4606.45898 | 22.21906 | 10985.86225 | 279.41704  | 4.05597  | 0.07142 | 275.33080  | 0.58432 |
| 4414 | 4628.51271 | 22.28152 | 9821.66076  | 744.75343  | 2.54122  | 0.03894 | 922.49948  | 0.41490 |
| 4415 | 4604.92478 | 22.17295 | 10973.65217 | 460.15354  | 5.66919  | 0.09434 | 546.94040  | 0.58747 |
| 4416 | 3905.60499 | 24.68419 | 10048.54853 | 977.59263  | 5.71931  | 0.01546 | 947.33018  | 0.36321 |
| 4417 | 4918.02314 | 10.79488 | 8768.36733  | 211.11414  | 0.75216  | 0.00653 | 304.33381  | 0.08798 |
| 4418 | 4843.49069 | 12.55972 | 13049.58289 | 347.72917  | 3.08862  | 0.02168 | 480.58263  | 0.32240 |
| 4419 | 4701.22060 | 18.31813 | 16551.92140 | 384.83906  | 4.88927  | 0.03387 | 510.10452  | 0.12601 |
| 4420 | 3793.03603 | 24.12927 | 11044.14309 | 625.00890  | 3.40785  | 0.03856 | 550.86120  | 0.82132 |
| 4421 | 4894.29476 | 9.48054  | 10012.20645 | 602.68093  | -0.64629 | 0.02549 | 766.72017  | 0.33098 |
| 4422 | 4672.56528 | 20.17113 | 9979.68211  | 371.79228  | 4.39376  | 0.04518 | 524.88102  | 0.26368 |
| 4423 | 4874.60253 | 7.71039  | 9721.80784  | 452.17445  | 0.56362  | 0.00913 | 628.18538  | 0.24272 |
| 4424 | 3651.24277 | 21.92260 | 12599.40198 | 98.75043   | 3.59334  | 0.01410 | 55.10365   | 0.71343 |
| 4425 | 4378.15126 | 18.83115 | 8559.08886  | 583.75139  | 2.53364  | 0.04370 | 620.24714  | 0.40431 |
| 4426 | 3656.91236 | 23.86073 | 10497.38107 | 1636.66620 | 8.88097  | 0.07078 | 1228.32561 | 1.07362 |
| 4427 | 4845.25717 | 12.67446 | 16805.40742 | 365.48569  | 3.49369  | 0.02340 | 507.43252  | 0.28126 |
| 4428 | 4642.48326 | 20.10959 | 8013.47009  | 431.19892  | 3.81703  | 0.04410 | 598.06800  | 0.32993 |
| 4429 | 3656.67493 | 23.86725 | 10510.27369 | 1023.57625 | 8.53027  | 0.07178 | 828.68593  | 0.81295 |
| 4430 | 3988.11671 | 22.96309 | 7949.91888  | 765.46563  | 1.88761  | 0.03398 | 802.97207  | 0.49773 |
| 4431 | 4617.77521 | 7.82939  | 16783.54578 | 133.54156  | -2.13110 | 0.00002 | 176.10351  | 0.11003 |
| 4432 | 4822.76945 | 20.83029 | 7796.58559  | 462.60997  | 3.67219  | 0.06034 | 556.11321  | 0.42055 |
| 4433 | 3538.88143 | 9.33820  | 7479.37103  | 612.83476  | 2.55583  | 0.04436 | 559.29161  | 0.68740 |
| 4434 | 4337.22622 | 18.29736 | 6897.65567  | 551.52918  | 3.90163  | 0.03688 | 621.61358  | 0.52123 |
| 4435 | 4496.63287 | 12.62442 | 9334.98074  | 570.47037  | -1.06643 | 0.02464 | 685.01323  | 0.28820 |
| 4436 | 4972.83285 | 8.58761  | 9173.24683  | 261.66141  | 0.49669  | 0.00323 | 386.14101  | 0.11720 |
| 4437 | 4070.62066 | 25.71097 | 8976.62961  | 818.25468  | 1.99607  | 0.01019 | 866.52371  | 0.44820 |
| 4438 | 4975.17189 | 10.29332 | 8959.00094  | 258.63426  | 2.90304  | 0.00472 | 378.75699  | 0.12053 |
| 4439 | 4790.76614 | 10.25147 | 11224.91006 | 384.46508  | 0.09640  | 0.02535 | 476.73850  | 0.39717 |
| 4440 | 4367.25792 | 18.79974 | 9614.66299  | 546.35118  | 2.88993  | 0.04271 | 623.05770  | 0.35323 |
| 4441 | 4742.40064 | 16.37322 | 9426.62681  | 56.25213   | -0.98691 | 0.00240 | 46.38594   | 1.17550 |
| 4442 | 4010.20411 | 17.16164 | 5821.43411  | 426.76607  | -3.18878 | 0.02667 | 496.35978  | 0.77895 |
| 4443 | 3755.92525 | 12.40878 | 6498.54826  | 330.43085  | -0.84220 | 0.01439 | 365.24514  | 0.38714 |
| 4444 | 4373.20509 | 20.43295 | 9934.64532  | 614.35667  | 2.78974  | 0.04229 | 690.59395  | 0.46582 |
| 4445 | 3491.51568 | 23.92795 | 11550.93251 | 990.21584  | 9.43347  | 0.15842 | 737.49081  | 1.89805 |
| 4446 | 4486.75302 | 20.66909 | 9760.05997  | 448.65433  | 7.54244  | 0.10976 | 536.81418  | 0.49945 |
| 4447 | 2585.95481 | 26.29966 | 11539.64060 | 652.98831  | 8.20969  | 0.17267 | 406.80266  | 1.33435 |
| 4448 | 4783.16975 | 16.53345 | 9813.10249  | 600.69395  | 0.53672  | 0.03051 | 782.63124  | 0.30891 |
| 4449 | 4759.39439 | 19.85610 | 12634.57018 | 295.28494  | 3.82837  | 0.07361 | 364.43032  | 0.64135 |
| 4450 | 3694.23322 | 24.56467 | 6221.11984  | 612.35657  | 3.17019  | 0.04057 | 557.06504  | 0.46281 |
| 4451 | 4972.96202 | 8.58819  | 9176.93203  | 349.43629  | -0.18686 | 0.00335 | 524.00608  | 0.11627 |
| 4452 | 4174.11834 | 12.25826 | 12530.42444 | 242.84363  | -0.73190 | 0.00489 | 301.54589  | 0.21965 |
| 4453 | 4425.17724 | 11.51947 | 8409.81524  | 666.20516  | -1.44265 | 0.01243 | 791.31156  | 0.18755 |
| 4454 | 4753.85645 | 21.57298 | 19590.12977 | 507.37405  | 2.92651  | 0.03156 | 675.81577  | 0.30301 |
| 4455 | 4606.66141 | 18.93074 | 8435.02946  | 499.98672  | 4.05326  | 0.03990 | 666.49320  | 0.30590 |
| 4456 | 4179.06781 | 18.96783 | 8269.16826  | 803.21884  | 1.86859  | 0.03251 | 853.54835  | 0.51874 |
| 4457 | 3909.03668 | 12.92676 | 12010.61615 | 482.92411  | 0.75472  | 0.03962 | 564.67407  | 0.45277 |
| 4458 | 4498.14748 | 21.28514 | 8794.86352  | 373.74778  | 5.07531  | 0.08169 | 380.30552  | 0.61874 |
| 4459 | 4377.15023 | 18.82391 | 8549.61785  | 573.17836  | 2.17953  | 0.04383 | 610.68936  | 0.41357 |
| 4460 | 4492.54849 | 21.08341 | 9210.41950  | 580.01177  | 1.87929  | 0.04473 | 754.71632  | 0.35521 |
| 4461 | 3376.95783 | 9.67954  | 6822.58186  | 247.37070  | 1.44558  | 0.05758 | 234.71258  | 0.45273 |
| 4462 | 4138.77446 | 19.38158 | 15221.40851 | 91.78476   | 1.64593  | 0.01163 | 54.08576   | 0.66425 |
| 4463 | 4680.50906 | 24.51407 | 8695.52564  | 393.14105  | 3.60135  | 0.06334 | 433.73803  | 0.96679 |
| 4464 | 3669.88181 | 14.07408 | 9935.04138  | 565.99484  | 0.80865  | 0.06172 | 564.34270  | 0.66518 |
| 4465 | 4580.70556 | 17.98936 | 8265.80999  | 428.68393  | 2.65520  | 0.02633 | 566.97636  | 0.31500 |
| 4466 | 3811.52690 | 23.70449 | 11054.32973 | 67.75289   | 3.03286  | 0.00676 | 24.03012   | 1.51288 |
| 4467 | 3501.07721 | 9.31478  | 7968.31460  | 495.84176  | 1.66584  | 0.03909 | 446.92244  | 0.48115 |

|      |            |          |             |            |          |         |           |         |
|------|------------|----------|-------------|------------|----------|---------|-----------|---------|
| 4468 | 4786.43664 | 15.65164 | 7007.55091  | 493.04401  | 3.71454  | 0.01416 | 715.78343 | 0.19333 |
| 4469 | 4443.23814 | 20.46647 | 8246.10664  | 420.26154  | 6.71167  | 0.08296 | 475.38756 | 0.57115 |
| 4470 | 4791.03773 | 15.76646 | 7078.38955  | 375.40010  | 3.93350  | 0.01490 | 553.52728 | 0.21029 |
| 4471 | 4803.84114 | 22.29439 | 10783.94980 | 680.38763  | 2.52485  | 0.01345 | 880.32842 | 0.27070 |
| 4472 | 4243.57802 | 19.06066 | 7235.25060  | 509.53639  | 3.74018  | 0.04930 | 558.27348 | 0.45140 |
| 4473 | 4549.76888 | 16.03055 | 11286.83006 | 262.26013  | 5.61931  | 0.07440 | 357.95135 | 0.38470 |
| 4474 | 4707.08250 | 11.12120 | 15928.96236 | 89.31876   | 3.19762  | 0.00742 | 87.65561  | 0.25438 |
| 4475 | 4769.51486 | 8.14960  | 9531.23920  | 301.89867  | -3.40071 | 0.00275 | 437.35618 | 0.06421 |
| 4476 | 4770.20712 | 8.17837  | 9891.30701  | 308.27225  | -4.33974 | 0.00267 | 443.94750 | 0.06900 |
| 4477 | 2925.29012 | 16.77663 | 14644.98748 | 467.48021  | 3.71113  | 0.23700 | 419.36959 | 0.70959 |
| 4478 | 4145.22778 | 16.48391 | 8935.30031  | 581.03440  | -1.16476 | 0.01840 | 648.55618 | 0.35606 |
| 4479 | 4441.34433 | 20.41431 | 8251.83930  | 600.96733  | 5.54807  | 0.11057 | 675.23758 | 0.56734 |
| 4480 | 4800.20524 | 16.87451 | 9925.19865  | 589.77938  | -0.00032 | 0.03251 | 790.07158 | 0.36650 |
| 4481 | 4003.65591 | 9.88099  | 9353.12875  | 334.22192  | -2.01650 | 0.00803 | 431.44849 | 0.18384 |
| 4482 | 3432.52317 | 8.13077  | 13747.58063 | 280.51412  | 1.37957  | 0.03425 | 287.20372 | 0.36806 |
| 4483 | 4528.00925 | 20.08495 | 21832.02121 | 474.11475  | 4.78706  | 0.11743 | 618.07918 | 0.26966 |
| 4484 | 3394.49256 | 9.57392  | 6825.27494  | 361.90183  | 1.25084  | 0.04875 | 303.60595 | 0.58090 |
| 4485 | 3776.44582 | 9.57259  | 8280.34608  | 439.72087  | -0.71138 | 0.04439 | 406.02883 | 0.63098 |
| 4486 | 2944.98461 | 24.91958 | 6670.05745  | 438.13704  | 5.74546  | 0.16700 | 218.63727 | 1.04738 |
| 4487 | 4462.57657 | 21.72992 | 7679.75394  | 448.09100  | 3.33538  | 0.03014 | 548.28065 | 0.34541 |
| 4488 | 4417.05979 | 17.83125 | 7197.97842  | 661.81583  | 1.51941  | 0.02997 | 781.99299 | 0.32498 |
| 4489 | 4941.64965 | 13.05839 | 9344.67094  | 348.35054  | 2.38865  | 0.00936 | 518.61017 | 0.18558 |
| 4490 | 2475.60212 | 13.54904 | 4280.20730  | 434.59423  | 6.34401  | 0.11499 | 318.55042 | 0.93747 |
| 4491 | 4247.00368 | 19.07304 | 7252.67129  | 677.95308  | 4.43741  | 0.05484 | 741.22964 | 0.40228 |
| 4492 | 3980.53979 | 22.97836 | 7922.55007  | 539.68794  | 1.95166  | 0.03521 | 527.59955 | 0.51115 |
| 4493 | 2490.91958 | 15.14434 | 3745.02210  | 475.59466  | 5.47445  | 0.36005 | 546.41462 | 0.71565 |
| 4494 | 3732.79238 | 13.08325 | 13705.69868 | 204.51742  | -0.62421 | 0.00377 | 255.57978 | 0.27723 |
| 4495 | 4145.25441 | 16.46658 | 8944.09333  | 556.73186  | -0.54810 | 0.01843 | 610.70921 | 0.40729 |
| 4496 | 4341.26824 | 18.31640 | 6914.43671  | 649.30343  | 3.80953  | 0.03756 | 682.00954 | 0.44867 |
| 4497 | 4286.60479 | 15.11546 | 12209.37060 | 587.56773  | -0.09359 | 0.02545 | 719.11541 | 0.33650 |
| 4498 | 4617.19545 | 21.71264 | 15583.24518 | 440.45379  | 5.60837  | 0.06212 | 512.21524 | 0.53016 |
| 4499 | 4717.52397 | 19.26357 | 9884.85389  | 620.85315  | 1.27853  | 0.03982 | 789.13951 | 0.28140 |
| 4500 | 4412.00145 | 22.74383 | 8365.32189  | 716.61599  | 3.30646  | 0.01463 | 907.65583 | 0.30238 |
| 4501 | 3576.40302 | 13.41041 | 5162.36651  | 589.79298  | 3.04794  | 0.04135 | 550.40378 | 0.72916 |
| 4502 | 3833.10591 | 15.81008 | 8625.02971  | 828.49912  | 2.41947  | 0.03267 | 830.82196 | 0.54022 |
| 4503 | 3293.18300 | 17.26744 | 7426.52253  | 339.49273  | -0.03015 | 0.08436 | 241.82764 | 0.79541 |
| 4504 | 4759.97139 | 8.18780  | 9986.53552  | 318.55405  | -3.37486 | 0.00270 | 444.95764 | 0.07791 |
| 4505 | 2903.17984 | 16.52171 | 14819.15033 | 482.85342  | 4.19267  | 0.19979 | 472.12443 | 0.74271 |
| 4506 | 4691.32264 | 15.35314 | 14208.90868 | 477.27628  | 4.36793  | 0.06824 | 672.11367 | 0.27044 |
| 4507 | 4690.47495 | 15.37485 | 14113.13085 | 423.21911  | 3.70932  | 0.05731 | 595.64623 | 0.29360 |
| 4508 | 4466.02029 | 20.48159 | 16395.25419 | 677.46048  | 3.42126  | 0.01616 | 824.48618 | 0.30280 |
| 4509 | 4573.58917 | 7.61646  | 8612.79352  | 316.37675  | -0.90584 | 0.00497 | 424.94547 | 0.13437 |
| 4510 | 5098.46348 | 12.99094 | 12284.34094 | 58.92830   | -2.05234 | 0.00086 | 35.32170  | 0.36299 |
| 4511 | 4917.97411 | 10.74593 | 8910.03361  | 144.19376  | 2.15923  | 0.00497 | 182.65227 | 0.13465 |
| 4512 | 4381.27483 | 18.87015 | 8611.04770  | 498.32408  | 2.55479  | 0.03811 | 493.37189 | 0.41237 |
| 4513 | 3767.61554 | 9.58771  | 8333.14750  | 422.26842  | 0.66403  | 0.06404 | 364.08963 | 0.50356 |
| 4514 | 3527.21810 | 23.36788 | 9110.31589  | 1035.68144 | 6.94762  | 0.06520 | 731.60226 | 1.25422 |
| 4515 | 3652.67332 | 23.93728 | 10499.70357 | 1166.74992 | 8.20612  | 0.06945 | 931.63698 | 1.12007 |
| 4516 | 4365.58482 | 18.84451 | 9571.09256  | 453.97044  | 3.80270  | 0.04956 | 515.08408 | 0.38517 |
| 4517 | 4010.96875 | 17.15782 | 5801.46171  | 435.21606  | -3.00257 | 0.02675 | 502.03153 | 0.82244 |
| 4518 | 3864.86618 | 23.84072 | 7257.88608  | 590.30584  | 6.69913  | 0.06302 | 572.93388 | 0.44455 |
| 4519 | 3396.10720 | 11.71526 | 7559.33017  | 560.45446  | 1.83131  | 0.08263 | 484.01373 | 0.72325 |
| 4520 | 4568.47335 | 22.51661 | 13113.62556 | 563.24990  | 3.92642  | 0.02842 | 709.37209 | 0.42242 |
| 4521 | 3754.16356 | 24.17348 | 10804.37076 | 652.85881  | 4.44864  | 0.05179 | 590.17953 | 0.76158 |
| 4522 | 4782.35500 | 16.50824 | 9773.67891  | 569.27066  | -0.32582 | 0.02923 | 743.05080 | 0.31416 |
| 4523 | 3832.87882 | 20.54879 | 12095.30891 | 303.95081  | -1.57491 | 0.08346 | 257.70347 | 0.88376 |
| 4524 | 4673.18921 | 18.86587 | 12278.15109 | 642.52047  | 4.35364  | 0.05062 | 829.88463 | 0.37225 |
| 4525 | 4255.95921 | 23.33069 | 12461.60803 | 665.29834  | 4.23984  | 0.01271 | 811.05201 | 0.12670 |
| 4526 | 3899.32243 | 13.47813 | 11238.86084 | 346.86085  | 0.06809  | 0.03488 | 368.17971 | 0.38033 |
| 4527 | 5113.28233 | 10.99301 | 13865.87225 | 190.52407  | 3.03508  | 0.00308 | 277.17791 | 0.12059 |
| 4528 | 4845.13664 | 15.31054 | 9381.81980  | 384.33589  | 2.23113  | 0.02415 | 559.46999 | 0.31427 |
| 4529 | 3581.91512 | 13.22475 | 5361.42659  | 633.31675  | 1.85353  | 0.04325 | 605.95234 | 0.57228 |
| 4530 | 3572.09105 | 23.29127 | 9343.22893  | 831.14203  | 7.67863  | 0.08744 | 546.03171 | 1.25872 |
| 4531 | 3833.32622 | 15.80959 | 8630.38336  | 776.70025  | 2.44940  | 0.03481 | 764.75123 | 0.55548 |
| 4532 | 4441.34073 | 21.73216 | 7593.17222  | 462.95476  | 2.57030  | 0.02971 | 583.54470 | 0.31029 |
| 4533 | 4530.43918 | 10.83191 | 17176.40131 | 93.72273   | -1.80313 | 0.00003 | 101.07292 | 1.16886 |
| 4534 | 4748.36205 | 14.79498 | 9624.72807  | 455.41892  | 3.78259  | 0.06111 | 634.39955 | 0.59712 |
| 4535 | 4838.88418 | 15.72145 | 8329.10078  | 394.30341  | 4.38098  | 0.03242 | 588.02374 | 0.20031 |
| 4536 | 4784.26054 | 15.48136 | 7007.63291  | 465.45426  | 2.41533  | 0.01372 | 673.63202 | 0.23791 |
| 4537 | 3771.91039 | 9.64058  | 8335.91816  | 515.43645  | 0.13567  | 0.04923 | 514.43175 | 0.56395 |
| 4538 | 4687.45890 | 21.35286 | 17485.86308 | 353.59108  | 4.87649  | 0.06639 | 418.21514 | 0.60249 |

|      |            |          |             |           |          |         |           |         |
|------|------------|----------|-------------|-----------|----------|---------|-----------|---------|
| 4539 | 4692.73660 | 15.39434 | 14143.11412 | 291.97630 | 4.76490  | 0.06370 | 405.43090 | 0.34896 |
| 4540 | 3518.10634 | 9.40516  | 8288.05514  | 310.61742 | -0.72129 | 0.02837 | 202.73342 | 0.53456 |
| 4541 | 4419.54760 | 15.24468 | 23864.01145 | 70.30253  | -2.78828 | 0.00023 | 41.64745  | 0.26370 |
| 4542 | 3293.88848 | 17.29392 | 7431.15067  | 422.58491 | 0.34612  | 0.08177 | 361.58259 | 0.77169 |
| 4543 | 4538.66274 | 15.87794 | 11179.39994 | 487.89467 | 4.89907  | 0.08833 | 685.67835 | 0.32761 |
| 4544 | 4966.31083 | 9.84751  | 8610.62909  | 334.19248 | 0.16215  | 0.00682 | 469.66319 | 0.15669 |
| 4545 | 3928.94166 | 18.53122 | 7263.48705  | 647.78833 | 6.18922  | 0.06149 | 516.11459 | 0.62291 |
| 4546 | 3931.68939 | 20.08365 | 9075.63599  | 798.17479 | 6.15748  | 0.05991 | 687.18671 | 0.69084 |
| 4547 | 3540.96640 | 9.43990  | 7203.80392  | 763.08692 | 2.92172  | 0.04753 | 713.30837 | 0.55734 |
| 4548 | 5013.28739 | 10.01099 | 9474.55944  | 301.20632 | 1.24754  | 0.00477 | 449.36482 | 0.15212 |
| 4549 | 3874.19971 | 20.23111 | 12836.06781 | 97.17224  | 3.44655  | 0.01327 | 52.83963  | 1.01976 |
| 4550 | 4705.73901 | 19.20152 | 9871.25666  | 591.88702 | 0.83834  | 0.04137 | 784.12572 | 0.28761 |
| 4551 | 4425.85915 | 11.53631 | 8418.98420  | 529.11663 | -1.18426 | 0.01155 | 615.57902 | 0.21162 |
| 4552 | 3542.77104 | 9.53820  | 7215.24719  | 745.01401 | 3.42577  | 0.04808 | 712.80109 | 0.64310 |
| 4553 | 4079.88657 | 21.82043 | 8933.90718  | 781.21138 | 2.86744  | 0.03101 | 785.28246 | 0.53064 |
| 4554 | 4380.46954 | 18.87678 | 8606.29765  | 593.69044 | 1.32385  | 0.03965 | 669.91498 | 0.42622 |
| 4555 | 3629.72394 | 22.41475 | 12231.78277 | 174.12095 | 4.18073  | 0.01588 | 169.26824 | 0.58857 |
| 4556 | 4785.86651 | 22.27002 | 10675.02586 | 479.70849 | 3.43498  | 0.04910 | 605.28815 | 0.51820 |
| 4557 | 3768.80485 | 11.98097 | 9264.64572  | 534.33835 | 0.21283  | 0.03427 | 531.69729 | 0.51372 |
| 4558 | 4084.91717 | 18.98336 | 6712.76706  | 787.01619 | 3.18386  | 0.07534 | 774.73085 | 0.60909 |
| 4559 | 4957.73032 | 6.62863  | 10216.00870 | 445.99208 | -2.85404 | 0.00620 | 645.08635 | 0.20419 |
| 4560 | 2952.55926 | 24.82149 | 7171.19519  | 524.55352 | 6.14156  | 0.15749 | 299.29459 | 0.95115 |
| 4561 | 4918.46454 | 10.76807 | 8912.73147  | 163.73085 | 2.24885  | 0.00515 | 222.05941 | 0.13770 |
| 4562 | 4037.19190 | 25.73898 | 8846.58889  | 759.67630 | 4.11200  | 0.01687 | 766.71501 | 0.45245 |
| 4563 | 3751.62149 | 12.29104 | 6462.49325  | 335.38070 | 0.20708  | 0.01798 | 353.27033 | 0.46285 |
| 4564 | 4220.59224 | 11.56515 | 11241.02802 | 143.92275 | -2.69849 | 0.00060 | 172.51220 | 0.70506 |
| 4565 | 2461.35467 | 14.13608 | 4194.05684  | 460.49876 | 6.22507  | 0.28240 | 505.79502 | 0.26418 |
| 4566 | 3179.76731 | 15.86827 | 12226.53586 | 423.92420 | 3.54589  | 0.10875 | 353.54753 | 0.68470 |
| 4567 | 4890.31977 | 9.34660  | 10043.99987 | 473.83416 | -1.26564 | 0.02280 | 619.56507 | 0.41356 |
| 4568 | 4689.21636 | 15.34974 | 14128.11117 | 364.91782 | 3.70509  | 0.06418 | 516.62084 | 0.34840 |
| 4569 | 4802.19923 | 15.93271 | 7155.75113  | 501.55531 | 5.25014  | 0.01562 | 729.23298 | 0.18044 |
| 4570 | 3191.59292 | 16.69170 | 7069.83793  | 411.88569 | 1.62206  | 0.10001 | 359.46223 | 0.65655 |
| 4571 | 3770.93428 | 9.64951  | 8362.28403  | 541.33387 | 0.33320  | 0.05507 | 554.28319 | 0.58209 |
| 4572 | 3914.29306 | 12.92870 | 12495.55521 | 353.47689 | -0.38521 | 0.03331 | 388.00380 | 0.30819 |
| 4573 | 4461.86835 | 21.77930 | 8005.88800  | 434.60069 | 2.69995  | 0.02715 | 549.49487 | 0.31291 |
| 4574 | 3915.10866 | 12.96120 | 12064.54343 | 459.02078 | -0.41980 | 0.03059 | 522.48292 | 0.45616 |
| 4575 | 4918.26846 | 10.72589 | 8905.12153  | 173.16835 | 1.91929  | 0.00474 | 246.85225 | 0.12924 |
| 4576 | 4293.53743 | 15.05101 | 12165.35141 | 450.31704 | -1.69374 | 0.01845 | 528.13609 | 0.36257 |
| 4577 | 4714.45764 | 17.85987 | 16086.87148 | 365.57925 | 3.15151  | 0.02384 | 483.69021 | 0.21134 |
| 4578 | 4557.17289 | 20.52551 | 17623.44867 | 538.76637 | 4.86129  | 0.09675 | 677.61656 | 0.39674 |
| 4579 | 4996.62964 | 6.53560  | 11176.90751 | 204.74724 | -3.81304 | 0.00088 | 291.63334 | 0.05442 |
| 4580 | 4425.84117 | 11.52729 | 8402.09054  | 578.63355 | -1.22035 | 0.01094 | 730.34231 | 0.25697 |
| 4581 | 4499.48329 | 22.42044 | 7745.81536  | 430.45676 | 5.98460  | 0.14368 | 468.94104 | 0.75660 |
| 4582 | 4423.59968 | 11.42970 | 8383.53824  | 579.59094 | -2.59890 | 0.01084 | 712.45780 | 0.29460 |
| 4583 | 4237.30578 | 23.40944 | 12370.04265 | 820.73217 | 2.52943  | 0.01131 | 935.00446 | 1.16023 |
| 4584 | 4914.63608 | 13.70923 | 8094.49388  | 377.93858 | 2.99447  | 0.01749 | 565.22348 | 0.20188 |
| 4585 | 3574.84164 | 13.34341 | 5198.37410  | 672.69042 | 2.90987  | 0.04003 | 653.59829 | 0.66594 |
| 4586 | 4574.25878 | 8.00658  | 8706.25051  | 270.86349 | -4.14501 | 0.00542 | 355.63406 | 0.17317 |
| 4587 | 4143.05289 | 12.93273 | 12634.18383 | 238.06860 | -0.23518 | 0.00602 | 295.09806 | 0.12214 |
| 4588 | 4711.41966 | 17.91519 | 16180.30023 | 379.34267 | 3.24722  | 0.02414 | 505.70681 | 0.21686 |
| 4589 | 4574.88997 | 20.69916 | 17297.62051 | 498.55038 | 5.46356  | 0.09356 | 638.01855 | 0.43173 |
| 4590 | 5167.79224 | 12.78106 | 11253.66126 | 43.29480  | -3.28889 | 0.00052 | 21.16749  | 1.16826 |
| 4591 | 4736.87510 | 21.71289 | 10159.04979 | 419.60617 | 4.43121  | 0.06624 | 512.16953 | 0.51151 |
| 4592 | 3647.12700 | 12.78045 | 26925.16639 | 190.62613 | 0.02252  | 0.01463 | 173.97312 | 0.50788 |
| 4593 | 4972.94509 | 8.58369  | 9206.23282  | 171.03565 | -0.07946 | 0.00392 | 218.36772 | 0.09794 |
| 4594 | 4248.26188 | 19.07841 | 7244.91869  | 510.90877 | 4.28357  | 0.05520 | 558.43301 | 0.39589 |
| 4595 | 2542.19622 | 14.87865 | 3487.21270  | 454.39914 | 5.06231  | 0.26516 | 491.70284 | 1.86253 |
| 4596 | 3275.21630 | 18.52683 | 18687.56372 | 516.11189 | 2.39448  | 0.19215 | 465.95693 | 0.97385 |
| 4597 | 4803.58656 | 16.91775 | 9955.10201  | 511.77590 | 0.13932  | 0.03186 | 681.79525 | 0.36837 |
| 4598 | 3786.04572 | 19.91702 | 9519.80428  | 586.68317 | -1.14587 | 0.03315 | 578.51021 | 1.26942 |
| 4599 | 4410.63408 | 17.88700 | 7007.79491  | 655.02083 | 3.25572  | 0.03619 | 713.24639 | 0.42565 |
| 4600 | 4514.59148 | 20.93429 | 15093.69848 | 688.29951 | 3.74663  | 0.01291 | 839.51666 | 0.22365 |
| 4601 | 3238.44302 | 19.61999 | 13357.29910 | 414.21177 | 2.41641  | 0.16755 | 341.06124 | 0.87164 |
| 4602 | 4899.16073 | 13.49548 | 8985.16234  | 599.74255 | 2.75197  | 0.01600 | 845.97896 | 0.24308 |
| 4603 | 3397.30525 | 11.74055 | 7556.18652  | 499.65764 | 1.59822  | 0.08387 | 404.74444 | 0.71885 |
| 4604 | 3121.39534 | 15.67810 | 6744.00434  | 354.71636 | 0.55715  | 0.01156 | 313.40263 | 0.26715 |
| 4605 | 3994.47354 | 13.62611 | 16499.36325 | 138.46635 | -1.25782 | 0.00254 | 155.11098 | 0.53510 |
| 4606 | 4336.59873 | 18.55072 | 14072.96086 | 57.66676  | 2.19644  | 0.01564 | 14.98248  | 1.52384 |
| 4607 | 2575.54249 | 26.39963 | 11248.47473 | 593.42146 | 8.12659  | 0.17881 | 267.96710 | 1.37772 |
| 4608 | 2969.06486 | 16.95728 | 15545.90047 | 384.87048 | 3.54567  | 0.13884 | 380.96023 | 0.83725 |
| 4609 | 4227.64861 | 24.74088 | 8260.65980  | 719.24195 | 1.73305  | 0.02160 | 788.45770 | 0.40036 |

|      |            |          |             |            |          |         |           |         |
|------|------------|----------|-------------|------------|----------|---------|-----------|---------|
| 4610 | 2871.83857 | 16.71259 | 13828.39416 | 299.95014  | 4.65406  | 0.23110 | 142.73559 | 0.70759 |
| 4611 | 4291.20674 | 18.11001 | 6899.07596  | 628.41910  | 1.50527  | 0.04914 | 692.70894 | 0.48209 |
| 4612 | 3453.39044 | 24.14709 | 11417.21794 | 1126.24388 | 9.69743  | 0.15190 | 785.17617 | 1.93651 |
| 4613 | 4310.64549 | 21.88657 | 8556.55333  | 677.51293  | 2.87360  | 0.03380 | 703.35794 | 0.56128 |
| 4614 | 4888.70777 | 9.39093  | 12659.76166 | 332.20599  | 2.75702  | 0.01867 | 497.02582 | 0.25743 |
| 4615 | 4894.25366 | 12.78141 | 7255.99431  | 400.74496  | 3.20331  | 0.04104 | 537.34307 | 0.31318 |
| 4616 | 4429.74882 | 15.58427 | 6446.68496  | 749.35798  | 1.82409  | 0.02420 | 859.30893 | 0.42273 |
| 4617 | 4575.24915 | 10.46544 | 9318.61474  | 451.13009  | -2.12967 | 0.02175 | 589.53590 | 0.20729 |
| 4618 | 4195.68496 | 23.77289 | 8454.58220  | 710.54947  | 2.53162  | 0.05387 | 765.32854 | 0.58456 |
| 4619 | 4463.98965 | 21.79850 | 7651.81051  | 539.92798  | 3.64547  | 0.03735 | 675.61254 | 0.27084 |
| 4620 | 4788.02539 | 15.70502 | 7016.80067  | 423.69358  | 4.57423  | 0.01568 | 624.24621 | 0.19488 |
| 4621 | 3377.64090 | 20.21272 | 9934.26456  | 135.52863  | 5.02831  | 0.01808 | 94.11135  | 1.11065 |
| 4622 | 3119.34588 | 19.30850 | 10308.49365 | 454.95919  | 2.86930  | 0.17683 | 310.19409 | 1.65216 |
| 4623 | 4145.58305 | 16.43409 | 8938.51744  | 757.38969  | -0.05876 | 0.02052 | 833.87883 | 0.38345 |
| 4624 | 2912.89146 | 20.07427 | 7962.84156  | 498.50175  | 5.61463  | 0.27432 | 343.76624 | 1.11413 |
| 4625 | 3752.24364 | 12.35848 | 6475.85667  | 396.80664  | -0.83442 | 0.01425 | 451.05299 | 0.41577 |
| 4626 | 3196.16257 | 16.75822 | 7015.22897  | 351.06271  | 1.34018  | 0.12427 | 309.82668 | 0.63762 |
| 4627 | 3393.23376 | 11.74174 | 7563.90950  | 584.15794  | 3.03244  | 0.09194 | 505.98484 | 0.73498 |
| 4628 | 4890.40021 | 9.34840  | 10045.85377 | 362.80734  | -1.27935 | 0.02242 | 458.24306 | 0.41766 |
| 4629 | 4080.29025 | 21.81710 | 8913.33680  | 845.06343  | 2.75880  | 0.03845 | 871.32729 | 0.50980 |
| 4630 | 4374.38417 | 20.37091 | 9971.81930  | 587.35896  | 2.46910  | 0.03857 | 665.09486 | 0.44189 |
| 4631 | 4184.80287 | 23.78522 | 8395.68891  | 747.44393  | 2.25389  | 0.06530 | 773.68504 | 0.55514 |
| 4632 | 4410.74822 | 22.74387 | 8359.30948  | 724.60502  | 3.14837  | 0.01488 | 921.28795 | 0.29377 |
| 4633 | 3431.83350 | 19.49591 | 19342.27662 | 380.06552  | 1.21494  | 0.11374 | 323.04516 | 0.74958 |
| 4634 | 3736.09272 | 11.51909 | 8790.34783  | 582.12165  | -0.63113 | 0.03089 | 578.33246 | 0.52457 |
| 4635 | 4410.89598 | 17.87229 | 7005.73963  | 650.96747  | 2.67363  | 0.04197 | 691.64179 | 0.42302 |
| 4636 | 4536.92548 | 15.86809 | 11208.55697 | 428.63478  | 5.36331  | 0.08728 | 600.04109 | 0.32866 |
| 4637 | 4853.11821 | 13.69110 | 11904.78776 | 400.76179  | 2.72192  | 0.03490 | 507.25134 | 0.49258 |
| 4638 | 3334.96830 | 24.25979 | 11581.22424 | 541.57409  | 3.58370  | 0.06526 | 441.82914 | 0.65734 |
| 4639 | 4442.33868 | 21.73468 | 7906.83906  | 588.56910  | 2.99354  | 0.03005 | 742.93188 | 0.31315 |
| 4640 | 4481.46941 | 22.21422 | 7200.51686  | 563.99942  | 5.19258  | 0.13940 | 691.44741 | 0.75483 |
| 4641 | 3577.85779 | 16.76814 | 18355.66556 | 398.76465  | 0.73080  | 0.08902 | 354.97339 | 0.71951 |
| 4642 | 2980.23409 | 26.42002 | 12791.25701 | 481.28809  | 5.64575  | 0.11342 | 232.57660 | 1.65623 |
| 4643 | 4147.85088 | 25.39812 | 7081.41337  | 53.99617   | 2.37809  | 0.00153 | 14.50731  | 2.07470 |
| 4644 | 2484.06211 | 14.83966 | 3807.26110  | 451.47573  | 5.38504  | 0.36689 | 517.05916 | 1.06760 |
| 4645 | 4878.13593 | 16.85964 | 8588.48017  | 274.43538  | 4.11870  | 0.05638 | 331.68649 | 0.40598 |
| 4646 | 4041.84109 | 25.72765 | 8871.18538  | 904.69867  | 3.66565  | 0.01512 | 912.36621 | 0.43876 |
| 4647 | 3621.02354 | 23.26147 | 5147.41839  | 435.33351  | 7.80891  | 0.07774 | 417.32145 | 0.46417 |
| 4648 | 4523.02092 | 20.91480 | 11811.64559 | 596.77168  | 4.15963  | 0.01503 | 728.84527 | 0.27803 |
| 4649 | 4604.57763 | 20.65289 | 21019.51994 | 407.04452  | 5.73603  | 0.07870 | 523.63190 | 0.48561 |
| 4650 | 3627.53557 | 23.26882 | 5155.28062  | 565.13510  | 7.86133  | 0.08531 | 574.78414 | 0.44917 |
| 4651 | 4041.15647 | 9.17306  | 11797.35080 | 254.17656  | -1.40493 | 0.00564 | 357.78087 | 0.11572 |
| 4652 | 3373.56559 | 20.27954 | 10407.26358 | 159.17135  | 4.75934  | 0.01983 | 143.39686 | 1.10202 |
| 4653 | 3735.54305 | 11.58197 | 8714.65144  | 520.31066  | 1.63972  | 0.02709 | 514.76073 | 0.60387 |
| 4654 | 4337.36246 | 19.38995 | 6379.05037  | 718.05671  | 2.38817  | 0.04966 | 792.85227 | 0.40648 |
| 4655 | 3905.54348 | 9.52440  | 14716.34033 | 156.09028  | -1.67022 | 0.00254 | 168.59301 | 0.95270 |
| 4656 | 3218.48535 | 14.54774 | 10035.20211 | 414.27049  | 2.77345  | 0.09632 | 447.80643 | 0.42076 |
| 4657 | 4514.04544 | 19.82433 | 7356.54104  | 595.30371  | 1.55944  | 0.04677 | 724.65338 | 0.46275 |
| 4658 | 4662.23347 | 16.45172 | 16551.32190 | 383.83332  | 4.45628  | 0.09948 | 520.25027 | 0.43422 |
| 4659 | 4916.59420 | 10.80763 | 8773.96657  | 214.43433  | 4.89993  | 0.00686 | 308.37303 | 0.09505 |
| 4660 | 4401.76122 | 6.54132  | 8040.32342  | 377.52561  | -3.95119 | 0.00289 | 505.04733 | 0.16710 |
| 4661 | 4692.77630 | 18.39914 | 16690.78617 | 400.21142  | 3.19635  | 0.02919 | 544.38711 | 0.17810 |
| 4662 | 4760.17384 | 18.31514 | 10565.61179 | 658.20140  | 3.29637  | 0.04858 | 848.36391 | 0.31731 |
| 4663 | 3261.26629 | 18.13906 | 9839.70013  | 418.40729  | 1.74106  | 0.12883 | 351.34619 | 0.88713 |
| 4664 | 4460.18546 | 20.97985 | 9276.64268  | 515.00557  | 4.20750  | 0.04857 | 660.49721 | 0.37023 |
| 4665 | 2918.25492 | 19.93195 | 8261.72662  | 542.66604  | 4.84086  | 0.27416 | 396.86416 | 1.06409 |
| 4666 | 4709.98954 | 11.08053 | 15911.46269 | 90.66267   | 1.72693  | 0.00464 | 80.28071  | 0.26777 |
| 4667 | 4876.64209 | 16.86604 | 8565.32755  | 363.37386  | 4.11972  | 0.06814 | 454.29870 | 0.36773 |
| 4668 | 4671.83958 | 18.85014 | 12273.15675 | 512.88343  | 3.93821  | 0.04810 | 636.87207 | 0.38857 |
| 4669 | 4406.40575 | 22.70899 | 8362.33488  | 733.71837  | 3.85582  | 0.01771 | 931.65959 | 0.29563 |
| 4670 | 4974.61524 | 10.27963 | 8953.01539  | 285.52241  | 0.98304  | 0.00474 | 425.55665 | 0.12042 |
| 4671 | 4920.36919 | 10.84992 | 8925.34854  | 129.95170  | 2.30634  | 0.00490 | 162.41580 | 0.14548 |
| 4672 | 5082.73146 | 13.27464 | 10115.10975 | 91.75112   | -0.80393 | 0.00109 | 98.69604  | 0.38932 |
| 4673 | 4575.52301 | 7.67887  | 8873.56647  | 260.52831  | -3.11498 | 0.00346 | 361.33878 | 0.09679 |
| 4674 | 4201.42896 | 21.00128 | 10527.73683 | 798.29901  | 2.55291  | 0.04035 | 858.70787 | 0.52290 |
| 4675 | 4291.34973 | 18.11187 | 6915.25557  | 586.80103  | 1.85558  | 0.04716 | 604.35671 | 0.53529 |
| 4676 | 3162.88244 | 24.94972 | 7894.13800  | 529.80404  | 5.60779  | 0.12625 | 298.16548 | 1.11739 |
| 4677 | 3867.60818 | 24.39866 | 6328.95492  | 1029.57654 | 4.67056  | 0.01691 | 948.16939 | 0.69284 |
| 4678 | 5088.53600 | 9.98764  | 14438.54315 | 147.64126  | -0.36749 | 0.00225 | 195.46234 | 0.28408 |
| 4679 | 3735.87614 | 11.64833 | 8697.21073  | 622.69821  | 1.98301  | 0.03182 | 585.36987 | 0.57700 |
| 4680 | 5181.10154 | 8.71389  | 6759.29777  | 41.14910   | -0.02440 | 0.00024 | 6.39250   | 0.62707 |

|      |            |          |             |            |          |         |           |         |
|------|------------|----------|-------------|------------|----------|---------|-----------|---------|
| 4681 | 4531.97917 | 20.20038 | 20358.46593 | 454.01659  | 5.08266  | 0.11420 | 589.60281 | 0.40080 |
| 4682 | 4816.71225 | 20.79408 | 7759.86208  | 503.72968  | 3.03198  | 0.05146 | 612.36939 | 0.43742 |
| 4683 | 4423.35199 | 11.42886 | 8380.09359  | 587.79707  | -2.53001 | 0.01059 | 722.29978 | 0.28637 |
| 4684 | 4085.70109 | 18.95571 | 6725.66782  | 791.52445  | 3.91262  | 0.07691 | 779.68382 | 0.63334 |
| 4685 | 2927.24363 | 19.94771 | 8408.10319  | 580.91153  | 4.44654  | 0.28357 | 427.41341 | 1.09142 |
| 4686 | 4969.63268 | 9.92736  | 8505.26214  | 439.59485  | 1.32383  | 0.00920 | 631.69895 | 0.15155 |
| 4687 | 4670.70360 | 20.16800 | 9988.88165  | 308.34791  | 5.16380  | 0.04618 | 411.64644 | 0.29682 |
| 4688 | 4872.29234 | 16.81799 | 8553.69848  | 416.22666  | 3.19368  | 0.05884 | 545.11072 | 0.40426 |
| 4689 | 4092.13872 | 18.99082 | 6771.50938  | 577.11310  | 2.98858  | 0.06009 | 563.02703 | 0.63567 |
| 4690 | 4174.02129 | 18.99396 | 8217.35984  | 785.12462  | 2.19411  | 0.03763 | 830.84982 | 0.46260 |
| 4691 | 3477.01891 | 13.94540 | 7321.71760  | 593.15341  | 2.09108  | 0.06080 | 540.47986 | 0.59899 |
| 4692 | 4928.02839 | 7.60688  | 9084.59729  | 376.25444  | -3.64878 | 0.00052 | 563.27757 | 0.03126 |
| 4693 | 4878.01006 | 16.85761 | 8606.73735  | 423.53699  | 3.04805  | 0.05726 | 554.08470 | 0.41489 |
| 4694 | 5024.72727 | 18.12668 | 10122.91564 | 338.17617  | 0.88801  | 0.01557 | 479.94724 | 0.24805 |
| 4695 | 4918.01521 | 10.73575 | 8901.94812  | 149.84930  | 1.65885  | 0.00535 | 205.48692 | 0.12396 |
| 4696 | 3303.56317 | 14.64111 | 11449.00044 | 430.88080  | 1.18079  | 0.06099 | 452.86286 | 0.60637 |
| 4697 | 4080.00442 | 21.84039 | 8927.69959  | 690.73831  | 2.80068  | 0.03006 | 661.03217 | 0.49542 |
| 4698 | 4889.35041 | 9.42957  | 12737.63439 | 406.23994  | 1.89559  | 0.01954 | 605.92502 | 0.27090 |
| 4699 | 3365.10303 | 24.32049 | 11012.85531 | 1002.04253 | 8.30981  | 0.14102 | 586.27398 | 1.95551 |
| 4700 | 4679.04790 | 21.50346 | 9108.40427  | 632.25942  | 4.03708  | 0.05765 | 775.56489 | 0.53262 |
| 4701 | 4711.14702 | 15.81057 | 11094.06082 | 455.13630  | 3.69939  | 0.05783 | 596.12051 | 0.30192 |
| 4702 | 4425.86734 | 11.53203 | 8401.60926  | 477.42496  | -0.99393 | 0.01224 | 551.00919 | 0.23857 |
| 4703 | 4606.33562 | 22.28312 | 8305.40511  | 639.31722  | 1.59922  | 0.03996 | 788.96895 | 0.40314 |
| 4704 | 5019.21832 | 13.77511 | 8480.81759  | 239.38616  | 1.90548  | 0.01786 | 333.92160 | 0.16671 |
| 4705 | 4446.26617 | 20.42182 | 16185.53875 | 710.54067  | 3.29979  | 0.01573 | 874.75743 | 0.23802 |
| 4706 | 4497.51138 | 21.26245 | 8789.31816  | 639.52119  | 5.70417  | 0.09879 | 735.92918 | 0.60744 |
| 4707 | 4935.40859 | 7.67292  | 8984.77341  | 359.55339  | -0.29544 | 0.00054 | 526.64725 | 0.03876 |
| 4708 | 4679.79321 | 24.51857 | 8689.92556  | 502.78437  | 4.45787  | 0.05984 | 587.71313 | 0.98666 |
| 4709 | 4439.74946 | 20.40001 | 8210.37165  | 590.85999  | 6.00163  | 0.10412 | 654.43550 | 0.47735 |
| 4710 | 4845.73628 | 13.56253 | 12121.46205 | 534.93171  | 1.10485  | 0.03441 | 681.87234 | 0.44207 |
| 4711 | 3538.41569 | 9.33187  | 7473.77211  | 541.09504  | 2.06939  | 0.04366 | 478.29350 | 0.69581 |
| 4712 | 4975.39065 | 10.32925 | 8722.69903  | 321.19594  | 4.34683  | 0.00483 | 480.36309 | 0.12897 |
| 4713 | 4792.46626 | 15.77491 | 7306.66582  | 366.64178  | 3.71025  | 0.01491 | 548.08234 | 0.21983 |
| 4714 | 4710.14326 | 15.79222 | 11056.98439 | 424.23872  | 4.99275  | 0.05407 | 549.31473 | 0.31804 |
| 4715 | 4290.59269 | 17.67371 | 7528.29793  | 758.47111  | 3.30445  | 0.04916 | 826.47470 | 0.42882 |
| 4716 | 4152.10126 | 12.86374 | 12627.91787 | 204.55513  | -0.68931 | 0.00550 | 252.26436 | 0.11811 |
| 4717 | 4768.79761 | 18.39189 | 10682.50855 | 636.59910  | 1.96874  | 0.03480 | 805.01756 | 0.37682 |
| 4718 | 4816.76995 | 20.82296 | 7746.09763  | 673.92343  | 3.46428  | 0.04916 | 825.72743 | 0.39739 |
| 4719 | 3582.89412 | 13.21239 | 5375.56356  | 479.40449  | 0.57523  | 0.04099 | 433.42586 | 0.56956 |
| 4720 | 3634.91212 | 12.64101 | 22454.18571 | 244.91289  | -0.01113 | 0.02171 | 245.74305 | 0.47541 |
| 4721 | 4338.28910 | 18.67026 | 7805.36493  | 441.02823  | 5.85905  | 0.11150 | 526.37173 | 0.49048 |
| 4722 | 4617.33158 | 21.71611 | 15585.05549 | 353.87668  | 5.04329  | 0.06107 | 382.81030 | 0.52812 |
| 4723 | 4463.18620 | 20.98529 | 9405.54176  | 453.72261  | 2.39190  | 0.04221 | 584.45337 | 0.36047 |
| 4724 | 4457.70974 | 19.58390 | 5692.59116  | 620.39887  | 3.02830  | 0.04001 | 698.89135 | 0.38718 |
| 4725 | 4423.51083 | 11.43437 | 8406.70547  | 540.32826  | -2.24574 | 0.01096 | 663.10939 | 0.28442 |
| 4726 | 5077.08835 | 13.17446 | 12162.03634 | 107.42579  | -0.69063 | 0.00120 | 126.67992 | 0.35416 |
| 4727 | 3735.50258 | 11.60078 | 8710.22990  | 607.60684  | 1.20822  | 0.03161 | 623.30838 | 0.57779 |
| 4728 | 4780.03550 | 10.42159 | 11759.54952 | 493.99132  | -0.91339 | 0.00854 | 678.79766 | 0.11301 |
| 4729 | 4782.94664 | 16.52565 | 9809.76838  | 546.92834  | 0.37505  | 0.02927 | 714.12900 | 0.37173 |
| 4730 | 4576.32442 | 10.37258 | 9312.23621  | 550.15630  | -2.34720 | 0.02443 | 679.75609 | 0.17887 |
| 4731 | 2493.71782 | 14.42428 | 3692.33542  | 462.16381  | 5.84296  | 0.31734 | 416.62371 | 0.31404 |
| 4732 | 3832.96829 | 15.80444 | 8628.77647  | 633.12194  | 1.88677  | 0.03541 | 632.72984 | 0.54867 |
| 4733 | 3833.16429 | 15.79554 | 8628.75422  | 794.03694  | 2.04818  | 0.03154 | 766.43401 | 0.56375 |
| 4734 | 4896.55918 | 9.54703  | 10016.73663 | 612.31446  | -0.77909 | 0.02283 | 800.00966 | 0.37602 |
| 4735 | 4739.34149 | 21.73877 | 10167.96033 | 573.22092  | 2.93779  | 0.06613 | 729.19948 | 0.49053 |
| 4736 | 4845.80385 | 12.74461 | 12993.88533 | 433.99946  | 2.85224  | 0.02543 | 621.31044 | 0.30747 |
| 4737 | 3485.04444 | 18.86107 | 18788.43127 | 470.33814  | 0.11471  | 0.05169 | 432.66569 | 1.70028 |
| 4738 | 4450.76913 | 20.10622 | 13460.24580 | 461.05407  | 5.09622  | 0.10489 | 553.15917 | 0.31940 |
| 4739 | 5016.21024 | 10.04317 | 9387.75302  | 263.05649  | 0.35242  | 0.00499 | 0.00000   | 0.16679 |
| 4740 | 4864.90856 | 11.74572 | 9959.77587  | 66.33619   | -0.89325 | 0.00483 | 0.00000   | 0.08840 |
| 4741 | 5003.99296 | 7.06633  | 16474.32787 | 139.56124  | -2.65970 | 0.00155 | 0.00000   | 0.03243 |
| 4742 | 4940.97868 | 9.98988  | 16179.73449 | 107.92025  | -1.08028 | 0.00190 | 0.00000   | 0.07212 |
| 4743 | 4900.22449 | 10.92117 | 8391.40912  | 139.11986  | 0.50369  | 0.00542 | 0.00000   | 0.09920 |
| 4744 | 4990.56927 | 11.95453 | 13775.85547 | 56.22720   | -2.97916 | 0.00114 | 0.00000   | 0.03538 |
| 4745 | 4644.55028 | 13.94826 | 14112.81694 | 75.08199   | 0.79918  | 0.00594 | 0.00000   | 0.05483 |
| 4746 | 4550.73468 | 17.75568 | 8422.41036  | 539.11066  | 1.77232  | 0.02651 | 0.00000   | 0.30956 |
| 4747 | 4628.41957 | 22.27102 | 9826.30095  | 711.57702  | 2.04163  | 0.03837 | 0.00000   | 0.38704 |
| 4748 | 4367.43507 | 18.79714 | 9614.98320  | 549.04908  | 2.58276  | 0.04200 | 0.00000   | 0.35148 |
| 4749 | 4704.32094 | 19.16168 | 9751.63619  | 646.97351  | 0.57566  | 0.04367 | 0.00000   | 0.29523 |
| 4750 | 4338.46213 | 17.13183 | 8211.50214  | 613.71043  | 2.56697  | 0.03887 | 0.00000   | 0.34619 |
| 4751 | 4381.01591 | 18.72668 | 8624.65172  | 636.65862  | 1.51818  | 0.03753 | 0.00000   | 0.38979 |

|      |            |          |             |           |          |         |         |         |
|------|------------|----------|-------------|-----------|----------|---------|---------|---------|
| 4752 | 4374.46500 | 20.36531 | 9975.05195  | 632.77345 | 2.06098  | 0.03846 | 0.00000 | 0.43573 |
| 4753 | 4513.96520 | 19.81885 | 7359.35142  | 667.46624 | 1.37213  | 0.04752 | 0.00000 | 0.46477 |
| 4754 | 4462.70523 | 21.00153 | 9420.57731  | 667.94344 | 2.24764  | 0.04598 | 0.00000 | 0.37888 |
| 4755 | 4246.33019 | 19.01003 | 7262.32361  | 545.28957 | 3.10537  | 0.04354 | 0.00000 | 0.44759 |
| 4756 | 4441.14242 | 21.73248 | 7905.58252  | 511.18035 | 2.34884  | 0.02985 | 0.00000 | 0.31178 |
| 4757 | 4497.42090 | 21.28824 | 8797.94266  | 534.94409 | 4.93088  | 0.08108 | 0.00000 | 0.63023 |
| 4758 | 4846.70106 | 13.59425 | 12153.70543 | 448.43904 | 1.27429  | 0.03501 | 0.00000 | 0.45910 |
| 4759 | 4785.69142 | 22.27156 | 10659.40792 | 447.10152 | 3.29575  | 0.04846 | 0.00000 | 0.50038 |
| 4760 | 4679.00544 | 21.50692 | 9124.84917  | 506.44016 | 3.28403  | 0.05184 | 0.00000 | 0.52631 |
| 4761 | 4820.79704 | 20.94298 | 7792.93135  | 612.59294 | 3.08698  | 0.04221 | 0.00000 | 0.42442 |
| 4762 | 4899.34385 | 16.87356 | 8796.64166  | 419.63755 | 2.47683  | 0.04464 | 0.00000 | 0.43319 |
| 4763 | 4605.69106 | 22.19392 | 10982.98572 | 439.68761 | 4.67434  | 0.07087 | 0.00000 | 0.57902 |
| 4764 | 4492.38941 | 20.51852 | 16577.42821 | 822.06488 | 2.62789  | 0.01255 | 0.00000 | 0.27246 |
| 4765 | 4410.41332 | 22.72610 | 8340.30354  | 752.42000 | 2.93996  | 0.01458 | 0.00000 | 0.30668 |
| 4766 | 4236.53785 | 23.40914 | 13332.46656 | 891.93291 | 3.19165  | 0.00921 | 0.00000 | 0.14777 |
| 4767 | 4803.62288 | 22.29385 | 11472.12695 | 738.02820 | 2.59528  | 0.01389 | 0.00000 | 0.27971 |
| 4768 | 4553.01835 | 22.52659 | 12869.62973 | 656.50754 | 4.59290  | 0.02457 | 0.00000 | 0.37432 |
| 4769 | 4544.22416 | 20.94909 | 15732.25328 | 778.07733 | 3.11293  | 0.01141 | 0.00000 | 0.24484 |
| 4770 | 3863.37651 | 24.03528 | 12296.08841 | 893.40053 | 5.47425  | 0.01663 | 0.00000 | 0.07085 |
| 4771 | 4958.35520 | 6.64027  | 10680.85577 | 359.94711 | -3.51757 | 0.00626 | 0.00000 | 0.19624 |
| 4772 | 4782.34160 | 16.50899 | 9774.13981  | 498.99610 | 0.21409  | 0.02976 | 0.00000 | 0.34947 |
| 4773 | 4878.74341 | 7.75031  | 10005.16780 | 383.80520 | -0.64451 | 0.00824 | 0.00000 | 0.23516 |
| 4774 | 4759.01805 | 18.18751 | 10723.79686 | 565.59041 | 1.38079  | 0.03332 | 0.00000 | 0.38149 |
| 4775 | 4969.16606 | 17.23865 | 8727.64904  | 685.98638 | 0.72162  | 0.01844 | 0.00000 | 0.28810 |
| 4776 | 4890.15097 | 9.34199  | 10188.40822 | 438.05565 | -1.22714 | 0.02336 | 0.00000 | 0.42019 |
| 4777 | 4790.04057 | 10.23943 | 11155.43039 | 505.62662 | 0.17248  | 0.02592 | 0.00000 | 0.38844 |
| 4778 | 4982.70080 | 9.91221  | 9062.26384  | 348.46745 | -0.17697 | 0.00758 | 0.00000 | 0.16117 |
| 4779 | 5005.40145 | 6.50742  | 11259.57831 | 233.95518 | -3.88280 | 0.00100 | 0.00000 | 0.02846 |
| 4780 | 4606.02826 | 22.28712 | 8296.85840  | 590.14888 | 2.13849  | 0.04070 | 0.00000 | 0.41497 |
| 4781 | 5045.89425 | 13.51289 | 8885.88606  | 350.81982 | 1.00457  | 0.01360 | 0.00000 | 0.20314 |
| 4782 | 4749.12613 | 14.79349 | 9638.75788  | 464.61772 | 2.73455  | 0.05741 | 0.00000 | 0.57340 |
| 4783 | 4770.22188 | 14.71859 | 12371.36240 | 448.40782 | 2.31963  | 0.01978 | 0.00000 | 0.38129 |
| 4784 | 4844.40210 | 15.28635 | 9726.66220  | 388.69896 | 2.13528  | 0.02464 | 0.00000 | 0.30723 |
| 4785 | 4885.63383 | 9.31552  | 12446.68425 | 468.40733 | 1.28838  | 0.01620 | 0.00000 | 0.27727 |
| 4786 | 4784.34673 | 15.47756 | 7030.55138  | 351.63799 | 2.30726  | 0.01376 | 0.00000 | 0.21589 |
| 4787 | 4748.32527 | 16.00145 | 21029.76320 | 421.03556 | 3.10172  | 0.05438 | 0.00000 | 0.64586 |
| 4788 | 4847.16556 | 13.30771 | 10866.83996 | 432.43357 | 2.01185  | 0.02303 | 0.00000 | 0.29032 |
| 4789 | 4637.15331 | 16.97324 | 10128.47185 | 457.75211 | 3.83825  | 0.06237 | 0.00000 | 0.52155 |
| 4790 | 4920.66871 | 19.94650 | 11495.57945 | 465.30654 | 2.18703  | 0.05304 | 0.00000 | 0.39705 |
| 4791 | 4899.32290 | 13.48881 | 8167.76237  | 391.82952 | 1.55560  | 0.01634 | 0.00000 | 0.23966 |
| 4792 | 4709.21575 | 19.22877 | 12646.93613 | 417.22128 | 3.81198  | 0.08071 | 0.00000 | 0.57421 |
| 4793 | 4940.49678 | 13.04077 | 9349.51167  | 321.07591 | 1.34743  | 0.00951 | 0.00000 | 0.17661 |
| 4794 | 4737.60962 | 15.91411 | 12178.07522 | 488.41238 | 3.08799  | 0.04680 | 0.00000 | 0.43364 |
| 4795 | 4419.08179 | 16.94150 | 10238.48840 | 511.80659 | 4.76054  | 0.07036 | 0.00000 | 0.59346 |
| 4796 | 5024.02629 | 18.11664 | 10151.20293 | 447.51771 | 1.61259  | 0.01559 | 0.00000 | 0.25392 |
| 4797 | 4686.74720 | 13.54553 | 9625.80855  | 460.67479 | 1.91948  | 0.02010 | 0.00000 | 0.23543 |
| 4798 | 4963.66441 | 9.90714  | 8538.95868  | 231.14552 | 0.63323  | 0.00441 | 0.00000 | 0.18918 |
| 4799 | 4843.63970 | 12.55898 | 13097.16879 | 453.65014 | 2.86523  | 0.02239 | 0.00000 | 0.32259 |
| 4800 | 4708.04537 | 17.92901 | 16236.60158 | 479.75052 | 3.01099  | 0.02468 | 0.00000 | 0.21008 |
| 4801 | 4451.84928 | 19.83511 | 7999.61500  | 449.35297 | 5.41188  | 0.08025 | 0.00000 | 0.60237 |
| 4802 | 4744.87321 | 21.53499 | 19959.19560 | 639.67585 | 4.10969  | 0.03460 | 0.00000 | 0.36994 |
| 4803 | 4911.67715 | 12.72757 | 7830.23723  | 432.90510 | 2.43924  | 0.03724 | 0.00000 | 0.31946 |
| 4804 | 4615.58019 | 18.64865 | 8327.01160  | 528.13147 | 4.11778  | 0.03307 | 0.00000 | 0.37155 |
| 4805 | 4642.37126 | 20.11082 | 9499.72689  | 438.62491 | 3.82625  | 0.04443 | 0.00000 | 0.32970 |
| 4806 | 4688.85449 | 21.36641 | 17831.52020 | 522.61287 | 4.65388  | 0.06959 | 0.00000 | 0.60552 |
| 4807 | 4604.62169 | 20.65763 | 22452.27649 | 475.52018 | 4.99511  | 0.07943 | 0.00000 | 0.50491 |
| 4808 | 4708.25576 | 15.77146 | 11409.12097 | 528.74166 | 4.31349  | 0.05000 | 0.00000 | 0.40105 |
| 4809 | 4675.06202 | 18.89039 | 12412.32605 | 591.72290 | 4.56430  | 0.04271 | 0.00000 | 0.38616 |
| 4810 | 4617.40053 | 21.71509 | 15573.16805 | 489.93610 | 4.83368  | 0.06033 | 0.00000 | 0.53547 |
| 4811 | 3788.78127 | 10.44758 | 21349.16544 | 63.62449  | 0.41597  | 0.00284 | 0.00000 | 0.29491 |
| 4812 | 3852.59514 | 24.77134 | 9888.25578  | 24.54670  | 3.27634  | 0.00953 | 0.00000 | 0.54950 |
| 4813 | 3825.28883 | 24.69801 | 9880.90346  | 22.16111  | 3.60039  | 0.01047 | 0.00000 | 0.64851 |
| 4814 | 3978.92051 | 20.14649 | 8902.20783  | 33.71955  | 1.64385  | 0.00816 | 0.00000 | 0.47338 |
| 4815 | 3457.74875 | 26.58061 | 24821.89340 | 28.61445  | 4.13820  | 0.00968 | 0.00000 | 1.05959 |
| 4816 | 4044.80962 | 22.75002 | 12658.75457 | 43.44625  | 0.48634  | 0.00164 | 0.00000 | 0.24990 |
| 4817 | 3824.77827 | 24.88699 | 14195.59824 | 39.47586  | 2.75108  | 0.00844 | 0.00000 | 0.37550 |
| 4818 | 4050.63244 | 23.81393 | 18403.52402 | 38.20737  | 1.00322  | 0.01619 | 0.00000 | 0.57869 |
| 4819 | 3405.69775 | 25.94402 | 14315.17746 | 52.24553  | 5.34929  | 0.04644 | 0.00000 | 1.10389 |
| 4820 | 3959.61555 | 20.04819 | 8889.00521  | 49.95954  | 0.75043  | 0.00845 | 0.00000 | 0.48175 |
| 4821 | 3459.81823 | 26.58378 | 24821.31054 | 40.41993  | 3.18316  | 0.00981 | 0.00000 | 1.07045 |
| 4822 | 4034.74726 | 22.70408 | 12658.76627 | 73.57945  | -0.25483 | 0.00169 | 0.00000 | 0.24268 |



|      |            |          |             |           |          |         |         |         |
|------|------------|----------|-------------|-----------|----------|---------|---------|---------|
| 4823 | 3813.51815 | 24.96279 | 14182.04558 | 41.77939  | 1.73926  | 0.00868 | 0.00000 | 0.38127 |
| 4824 | 4029.34973 | 23.81267 | 18512.67165 | 72.28069  | 0.23617  | 0.01684 | 0.00000 | 0.58919 |
| 4825 | 3405.61409 | 25.94325 | 14315.43964 | 51.85344  | 4.32482  | 0.04724 | 0.00000 | 1.11469 |
| 4826 | 3960.83926 | 19.94881 | 8852.54692  | 50.63901  | 0.80554  | 0.00841 | 0.00000 | 0.49114 |
| 4827 | 3481.67132 | 26.62238 | 24822.55669 | 49.08086  | 3.19833  | 0.00963 | 0.00000 | 1.09682 |
| 4828 | 4013.31867 | 22.64017 | 12629.01011 | 56.76243  | -0.17874 | 0.00177 | 0.00000 | 0.24790 |
| 4829 | 3793.74749 | 25.08690 | 14170.34650 | 72.50262  | 1.81233  | 0.00899 | 0.00000 | 0.38403 |
| 4830 | 4011.85666 | 23.78029 | 18576.80006 | 50.43568  | 0.37004  | 0.01745 | 0.00000 | 0.59399 |
| 4831 | 3405.52014 | 25.94181 | 14315.97481 | 84.47058  | 3.90518  | 0.04803 | 0.00000 | 1.12396 |
| 4832 | 3956.50359 | 19.88672 | 8842.46633  | 71.29141  | 1.23058  | 0.00722 | 0.00000 | 0.50120 |
| 4833 | 3491.34480 | 26.60474 | 24817.05836 | 68.53953  | 3.46652  | 0.00771 | 0.00000 | 1.11554 |
| 4834 | 3984.49150 | 22.58652 | 13239.92194 | 67.11125  | 0.24606  | 0.00187 | 0.00000 | 0.26650 |
| 4835 | 3765.77810 | 25.19249 | 14193.07366 | 74.56878  | 2.58736  | 0.00808 | 0.00000 | 0.39754 |
| 4836 | 3988.72708 | 23.77095 | 18704.70242 | 77.06120  | 0.76920  | 0.01773 | 0.00000 | 0.60795 |
| 4837 | 3402.84992 | 25.93306 | 14310.57766 | 81.08850  | 4.92721  | 0.04635 | 0.00000 | 1.13810 |
| 4838 | 3952.58044 | 19.83791 | 8825.31293  | 36.15291  | 1.37858  | 0.00737 | 0.00000 | 0.50439 |
| 4839 | 3505.94137 | 26.56075 | 24776.00050 | 33.44589  | 3.63083  | 0.00767 | 0.00000 | 1.13832 |
| 4840 | 3962.08294 | 22.56028 | 13181.01534 | 34.57745  | 0.46839  | 0.00196 | 0.00000 | 0.27466 |
| 4841 | 3754.66148 | 25.22629 | 14215.01848 | 30.22114  | 2.85332  | 0.00830 | 0.00000 | 0.39508 |
| 4842 | 3955.90096 | 23.74629 | 18856.73659 | 34.05954  | 1.05059  | 0.01861 | 0.00000 | 0.62660 |
| 4843 | 3402.08543 | 25.93469 | 14313.44066 | 27.32229  | 5.30045  | 0.04717 | 0.00000 | 1.14265 |
| 4844 | 3947.07995 | 19.97153 | 8937.35738  | 60.58989  | 0.52991  | 0.00748 | 0.00000 | 0.50143 |
| 4845 | 3498.78253 | 26.55773 | 24758.11864 | 51.50079  | 2.71106  | 0.00783 | 0.00000 | 1.14569 |
| 4846 | 3938.27452 | 22.69239 | 12875.65033 | 65.04681  | -0.15946 | 0.00209 | 0.00000 | 0.28594 |
| 4847 | 3760.74474 | 25.18670 | 14224.24375 | 43.76294  | 1.78643  | 0.00839 | 0.00000 | 0.40265 |
| 4848 | 3941.10581 | 23.75892 | 18542.42147 | 73.13872  | 0.33016  | 0.01878 | 0.00000 | 0.62121 |
| 4849 | 3403.26852 | 25.92946 | 14304.32274 | 54.91960  | 4.17174  | 0.04793 | 0.00000 | 1.15112 |
| 4850 | 3947.68030 | 19.85518 | 8813.86561  | 66.07958  | 1.10468  | 0.00776 | 0.00000 | 0.51726 |
| 4851 | 3498.17814 | 26.53706 | 24778.07463 | 61.46671  | 3.13861  | 0.00801 | 0.00000 | 1.16813 |
| 4852 | 3904.24260 | 22.68628 | 12700.92598 | 75.87383  | 0.58134  | 0.00217 | 0.00000 | 0.30535 |
| 4853 | 3739.27014 | 25.19865 | 14250.40041 | 90.67660  | 2.29451  | 0.00872 | 0.00000 | 0.41810 |
| 4854 | 3916.21384 | 23.67977 | 18926.71660 | 74.34244  | 0.99111  | 0.02005 | 0.00000 | 0.65568 |
| 4855 | 3400.21322 | 25.93078 | 14320.44017 | 114.91253 | 4.42123  | 0.04892 | 0.00000 | 1.16103 |
| 4856 | 3939.31496 | 19.80257 | 8817.00221  | 28.73896  | 1.19491  | 0.00789 | 0.00000 | 0.52671 |
| 4857 | 3497.09949 | 26.53113 | 24789.03354 | 22.18559  | 3.61204  | 0.00808 | 0.00000 | 1.18416 |
| 4858 | 3844.70423 | 22.26955 | 12753.85422 | 48.32080  | 0.71763  | 0.00238 | 0.00000 | 0.33555 |
| 4859 | 3730.13863 | 25.17711 | 14283.09456 | 17.97087  | 3.03355  | 0.00886 | 0.00000 | 0.42849 |
| 4860 | 3891.70150 | 23.57646 | 18965.69392 | 39.21349  | 1.03456  | 0.02073 | 0.00000 | 0.67562 |
| 4861 | 3400.37034 | 25.92259 | 14296.99056 | 26.79564  | 5.46704  | 0.04937 | 0.00000 | 1.19159 |
| 4862 | 3930.76374 | 19.73946 | 8829.18171  | 27.08215  | 2.32020  | 0.01095 | 0.00000 | 0.53319 |
| 4863 | 3503.95112 | 26.51830 | 24823.80882 | 25.87277  | 4.48385  | 0.00941 | 0.00000 | 1.19686 |
| 4864 | 3808.41178 | 22.03166 | 12482.25067 | 37.58169  | 2.22826  | 0.00291 | 0.00000 | 0.33983 |
| 4865 | 3715.41940 | 25.20663 | 14261.10624 | 49.93704  | 3.85404  | 0.00762 | 0.00000 | 0.44513 |
| 4866 | 3866.02525 | 23.47529 | 19063.36505 | 27.43226  | 2.41164  | 0.02120 | 0.00000 | 0.69616 |
| 4867 | 3402.36016 | 25.92275 | 14303.62822 | 68.47201  | 6.06577  | 0.05475 | 0.00000 | 1.15959 |
| 4868 | 3917.00065 | 19.57789 | 8877.66196  | 41.23279  | 2.50569  | 0.01125 | 0.00000 | 0.53473 |
| 4869 | 3503.96135 | 26.50425 | 24859.17268 | 35.92213  | 4.56976  | 0.00945 | 0.00000 | 1.14963 |
| 4870 | 3766.97471 | 21.73547 | 12546.03562 | 44.57714  | 2.41012  | 0.00309 | 0.00000 | 0.30109 |
| 4871 | 3708.98084 | 25.09320 | 14306.37250 | 36.76889  | 3.82370  | 0.00776 | 0.00000 | 0.40138 |
| 4872 | 3827.87110 | 23.22626 | 19183.84755 | 43.01406  | 2.67146  | 0.02221 | 0.00000 | 0.70681 |
| 4873 | 3397.97479 | 25.90086 | 14307.27354 | 43.56024  | 5.70185  | 0.05589 | 0.00000 | 1.13898 |
| 4874 | 3898.98514 | 19.65781 | 9060.31652  | 42.12304  | 2.04479  | 0.01271 | 0.00000 | 0.48425 |
| 4875 | 3500.61968 | 26.52075 | 24769.83047 | 31.79592  | 4.11159  | 0.01123 | 0.00000 | 1.15068 |
| 4876 | 3737.85479 | 21.63562 | 12702.50804 | 57.35475  | 1.75991  | 0.00356 | 0.00000 | 0.30102 |
| 4877 | 3696.71358 | 25.03441 | 14330.41047 | 32.17617  | 3.55696  | 0.00857 | 0.00000 | 0.40351 |
| 4878 | 3805.55552 | 23.15078 | 18652.67236 | 50.40268  | 2.10756  | 0.02520 | 0.00000 | 0.69206 |
| 4879 | 3402.93398 | 25.88362 | 14377.71550 | 31.28761  | 5.50710  | 0.05909 | 0.00000 | 1.09496 |
| 4880 | 4082.96967 | 18.28357 | 9063.18961  | 40.52989  | -2.82720 | 0.00460 | 0.00000 | 0.41123 |
| 4881 | 3477.84580 | 26.47308 | 24780.39485 | 33.03333  | 4.13676  | 0.00642 | 0.00000 | 1.13117 |
| 4882 | 3821.27881 | 20.73553 | 12725.01077 | 43.66497  | -4.02745 | 0.00196 | 0.00000 | 0.24920 |
| 4883 | 3721.07210 | 24.82420 | 14337.89345 | 49.55165  | 1.85870  | 0.00826 | 0.00000 | 0.38231 |
| 4884 | 4142.72434 | 19.66844 | 18662.24625 | 47.08515  | -1.71248 | 0.01602 | 0.00000 | 0.55329 |
| 4885 | 3401.89478 | 25.86750 | 14387.04431 | 74.00227  | 5.09778  | 0.04191 | 0.00000 | 1.08805 |
| 4886 | 3890.96327 | 19.56865 | 9061.73135  | 91.59705  | 2.04761  | 0.00503 | 0.00000 | 0.49834 |
| 4887 | 3479.35976 | 26.52646 | 24791.52008 | 83.83750  | 4.16193  | 0.00616 | 0.00000 | 1.17360 |
| 4888 | 3715.24491 | 21.79616 | 12760.43545 | 99.23969  | 2.22335  | 0.00223 | 0.00000 | 0.31496 |
| 4889 | 3681.87404 | 25.07996 | 14359.50474 | 76.37401  | 3.43837  | 0.00823 | 0.00000 | 0.41904 |
| 4890 | 3797.37477 | 23.09877 | 18660.01636 | 102.50874 | 2.31481  | 0.02291 | 0.00000 | 0.71231 |
| 4891 | 3397.49246 | 25.88383 | 14403.73397 | 92.20627  | 5.40208  | 0.04337 | 0.00000 | 1.11266 |
| 4892 | 3891.06720 | 19.57734 | 9056.70473  | 66.25444  | 2.29306  | 0.00490 | 0.00000 | 0.51378 |
| 4893 | 3475.30886 | 26.52895 | 24804.71587 | 68.39702  | 4.33074  | 0.00604 | 0.00000 | 1.18698 |

|      |            |          |             |           |         |         |         |         |
|------|------------|----------|-------------|-----------|---------|---------|---------|---------|
| 4894 | 3714.02457 | 21.84493 | 12551.67307 | 68.47461  | 2.47311 | 0.00214 | 0.00000 | 0.32697 |
| 4895 | 3681.23499 | 25.05700 | 14366.09699 | 72.24661  | 3.42435 | 0.00813 | 0.00000 | 0.42204 |
| 4896 | 3795.86736 | 23.07134 | 18454.83283 | 64.09842  | 2.60561 | 0.02232 | 0.00000 | 0.72438 |
| 4897 | 3395.79566 | 25.87407 | 14408.34600 | 67.97748  | 5.17418 | 0.04236 | 0.00000 | 1.13112 |
| 4898 | 3895.07527 | 19.62579 | 9057.99743  | 39.25660  | 3.69640 | 0.00512 | 0.00000 | 0.52647 |
| 4899 | 3464.21872 | 26.53792 | 24806.97732 | 37.64887  | 5.68599 | 0.00612 | 0.00000 | 1.19890 |
| 4900 | 3713.55160 | 21.85438 | 12550.60993 | 43.50683  | 3.79432 | 0.00234 | 0.00000 | 0.33857 |
| 4901 | 3684.55799 | 24.94835 | 14390.75592 | 46.28448  | 4.71866 | 0.00846 | 0.00000 | 0.43297 |
| 4902 | 3794.57008 | 23.05464 | 18461.20544 | 39.96978  | 3.92668 | 0.02269 | 0.00000 | 0.73970 |
| 4903 | 3392.96143 | 25.87398 | 14422.25650 | 89.90172  | 5.81964 | 0.04671 | 0.00000 | 1.09532 |
| 4904 | 3889.72393 | 19.59123 | 9048.92188  | 79.36480  | 2.03873 | 0.00474 | 0.00000 | 0.54213 |
| 4905 | 3464.23756 | 26.53577 | 24820.03727 | 85.10264  | 4.17501 | 0.00631 | 0.00000 | 1.20286 |
| 4906 | 3710.72400 | 21.79473 | 12551.88522 | 80.38163  | 2.04022 | 0.00221 | 0.00000 | 0.35051 |
| 4907 | 3684.70297 | 24.91425 | 14403.38124 | 98.84116  | 3.24714 | 0.00926 | 0.00000 | 0.44173 |
| 4908 | 3787.30302 | 23.00340 | 18489.91851 | 75.52731  | 2.24022 | 0.02170 | 0.00000 | 0.76527 |
| 4909 | 3391.18822 | 25.85684 | 14425.79019 | 99.96687  | 4.98800 | 0.04427 | 0.00000 | 1.12026 |
| 4910 | 3886.86799 | 19.55672 | 9048.24852  | 53.27092  | 2.64890 | 0.00539 | 0.00000 | 0.52997 |
| 4911 | 3461.13964 | 26.52898 | 24815.86927 | 44.90449  | 4.69040 | 0.00680 | 0.00000 | 1.16909 |
| 4912 | 3712.92952 | 21.78982 | 12538.38889 | 58.54649  | 2.57337 | 0.00240 | 0.00000 | 0.36136 |
| 4913 | 3690.41050 | 24.84215 | 14427.03689 | 51.79252  | 3.78654 | 0.00658 | 0.00000 | 0.44209 |
| 4914 | 3789.76934 | 22.97971 | 18501.01792 | 58.12192  | 2.81421 | 0.02364 | 0.00000 | 0.78441 |
| 4915 | 3390.60691 | 25.84880 | 14426.47659 | 51.91721  | 5.51724 | 0.04774 | 0.00000 | 1.11615 |
| 4916 | 3876.09369 | 19.50515 | 9051.06350  | 39.73588  | 3.62004 | 0.00499 | 0.00000 | 0.49404 |
| 4917 | 3447.98828 | 26.55901 | 24805.94082 | 34.47006  | 5.63932 | 0.00678 | 0.00000 | 1.13528 |
| 4918 | 3713.02983 | 21.79618 | 12537.24995 | 73.30362  | 3.63396 | 0.00223 | 0.00000 | 0.36901 |
| 4919 | 3694.57882 | 24.84318 | 14431.30893 | 33.75616  | 4.56318 | 0.00697 | 0.00000 | 0.42510 |
| 4920 | 3792.70849 | 22.99664 | 18477.58943 | 55.81173  | 3.75228 | 0.02311 | 0.00000 | 0.79712 |
| 4921 | 3393.35724 | 25.84738 | 14410.98654 | 49.33135  | 5.87286 | 0.04498 | 0.00000 | 1.11569 |
| 4922 | 3878.68538 | 19.53423 | 9056.26113  | 49.26828  | 3.25274 | 0.00617 | 0.00000 | 0.48238 |
| 4923 | 3446.50880 | 26.56561 | 24800.94046 | 42.22477  | 5.22084 | 0.00761 | 0.00000 | 1.14517 |
| 4924 | 3713.49793 | 21.86035 | 12549.33436 | 52.65802  | 3.27310 | 0.00245 | 0.00000 | 0.37680 |
| 4925 | 3695.02284 | 24.85791 | 14424.96461 | 47.06528  | 4.06901 | 0.00625 | 0.00000 | 0.41867 |
| 4926 | 3800.67296 | 23.05201 | 18432.22018 | 52.05942  | 3.36422 | 0.02345 | 0.00000 | 0.80537 |
| 4927 | 3395.75647 | 25.84745 | 14400.55906 | 68.71607  | 5.17577 | 0.04911 | 0.00000 | 1.13994 |
| 4928 | 3885.30158 | 19.63278 | 9058.95523  | 29.58306  | 3.02455 | 0.00639 | 0.00000 | 0.48992 |
| 4929 | 3444.70520 | 26.58030 | 24788.60300 | 27.65367  | 5.22674 | 0.00728 | 0.00000 | 1.14946 |
| 4930 | 3732.87109 | 22.11624 | 12526.14699 | 45.57390  | 2.97020 | 0.00170 | 0.00000 | 0.36278 |
| 4931 | 3701.59290 | 24.96835 | 14388.20080 | 17.00601  | 3.99342 | 0.00557 | 0.00000 | 0.42588 |
| 4932 | 3818.44599 | 23.21688 | 18370.48163 | 35.82298  | 3.15817 | 0.02349 | 0.00000 | 0.80783 |
| 4933 | 3402.82378 | 25.87153 | 14382.10532 | 28.03656  | 5.52681 | 0.05068 | 0.00000 | 1.15763 |
| 4934 | 3885.55030 | 19.62400 | 9057.43667  | 73.55508  | 2.97343 | 0.00554 | 0.00000 | 0.48892 |
| 4935 | 3447.25107 | 26.57105 | 24788.57086 | 69.31689  | 5.12054 | 0.00642 | 0.00000 | 1.15810 |
| 4936 | 3733.83238 | 22.10214 | 12522.66212 | 75.16255  | 2.87247 | 0.00140 | 0.00000 | 0.37148 |
| 4937 | 3700.57558 | 24.98463 | 14394.70849 | 105.20444 | 4.11894 | 0.00569 | 0.00000 | 0.43643 |
| 4938 | 3816.27885 | 23.21968 | 18406.07573 | 70.19292  | 3.06401 | 0.02075 | 0.00000 | 0.81813 |
| 4939 | 3403.06742 | 25.87400 | 14380.37934 | 136.85680 | 5.97077 | 0.04592 | 0.00000 | 1.16073 |
| 4940 | 3885.64009 | 19.62795 | 9062.31476  | 29.86785  | 2.64734 | 0.00640 | 0.00000 | 0.49553 |
| 4941 | 3450.12815 | 26.55813 | 24780.78738 | 22.06118  | 4.74027 | 0.00599 | 0.00000 | 1.15221 |
| 4942 | 3731.63607 | 22.10904 | 12532.11477 | 52.17406  | 2.41045 | 0.00148 | 0.00000 | 0.40421 |
| 4943 | 3698.85739 | 25.02352 | 14392.08645 | 34.41296  | 3.97764 | 0.00483 | 0.00000 | 0.44748 |
| 4944 | 3814.51997 | 23.21740 | 18416.05773 | 38.54247  | 2.64709 | 0.02172 | 0.00000 | 0.82508 |
| 4945 | 3405.74765 | 25.88331 | 14370.43493 | 51.91678  | 5.92489 | 0.04431 | 0.00000 | 1.15329 |
| 4946 | 3883.17522 | 19.59256 | 9063.51925  | 73.04485  | 2.06956 | 0.00680 | 0.00000 | 0.49850 |
| 4947 | 3464.69701 | 26.50021 | 24739.40182 | 73.76030  | 4.02861 | 0.00651 | 0.00000 | 1.14884 |
| 4948 | 3713.28727 | 22.02245 | 12568.50074 | 75.76579  | 2.14046 | 0.00162 | 0.00000 | 0.43503 |
| 4949 | 3689.99623 | 25.08516 | 14378.90878 | 68.53240  | 3.22187 | 0.00467 | 0.00000 | 0.45345 |
| 4950 | 3804.62633 | 23.15218 | 18448.40136 | 74.41760  | 2.22580 | 0.02204 | 0.00000 | 0.75966 |
| 4951 | 3407.23207 | 25.88418 | 14364.23639 | 85.00631  | 4.95547 | 0.04657 | 0.00000 | 1.15740 |
| 4952 | 3885.14785 | 19.59435 | 9064.79189  | 69.51503  | 3.67087 | 0.00646 | 0.00000 | 0.49149 |
| 4953 | 3466.98529 | 26.48319 | 24733.78364 | 60.94211  | 5.71575 | 0.00562 | 0.00000 | 1.10051 |
| 4954 | 3693.54356 | 22.02925 | 12579.65381 | 85.90287  | 3.89417 | 0.00148 | 0.00000 | 0.45276 |
| 4955 | 3681.91615 | 25.14180 | 14341.01898 | 84.03167  | 4.67919 | 0.00473 | 0.00000 | 0.43319 |
| 4956 | 3808.69599 | 23.07933 | 18407.00649 | 79.84258  | 3.82438 | 0.02435 | 0.00000 | 0.70177 |
| 4957 | 3407.41806 | 25.88408 | 14363.31423 | 92.38672  | 5.76546 | 0.04654 | 0.00000 | 1.13315 |
| 4958 | 3884.42449 | 19.59040 | 9060.98985  | 38.36664  | 2.32746 | 0.00838 | 0.00000 | 0.48804 |
| 4959 | 3466.78602 | 26.47989 | 24732.18435 | 33.99221  | 4.29151 | 0.00760 | 0.00000 | 1.09379 |
| 4960 | 3689.81414 | 22.02799 | 12593.45888 | 61.30399  | 2.52037 | 0.00201 | 0.00000 | 0.46185 |
| 4961 | 3678.36435 | 25.14998 | 14312.52522 | 52.29471  | 3.52994 | 0.00537 | 0.00000 | 0.43834 |
| 4962 | 3808.39829 | 23.06441 | 18417.53572 | 49.94551  | 2.50631 | 0.02910 | 0.00000 | 0.70670 |
| 4963 | 3407.10611 | 25.88379 | 14361.74372 | 74.57955  | 5.73607 | 0.04043 | 0.00000 | 1.12351 |
| 4964 | 3886.85180 | 19.61671 | 9061.44587  | 63.53706  | 3.08213 | 0.00972 | 0.00000 | 0.48678 |

|      |            |          |             |           |         |         |         |         |
|------|------------|----------|-------------|-----------|---------|---------|---------|---------|
| 4965 | 3464.02812 | 26.48485 | 24740.10400 | 57.05136  | 5.18940 | 0.00821 | 0.00000 | 1.08490 |
| 4966 | 3689.86112 | 22.04360 | 12613.13831 | 70.35473  | 3.25849 | 0.00239 | 0.00000 | 0.48055 |
| 4967 | 3680.94370 | 25.15780 | 14298.52143 | 60.50959  | 4.29397 | 0.00483 | 0.00000 | 0.43896 |
| 4968 | 3813.53565 | 23.07359 | 18389.54919 | 64.21563  | 3.20961 | 0.03557 | 0.00000 | 0.70924 |
| 4969 | 3406.87297 | 25.88337 | 14351.85340 | 73.00078  | 6.22668 | 0.06162 | 0.00000 | 1.15020 |
| 4970 | 3884.91049 | 19.66927 | 9065.96483  | 83.91284  | 4.60506 | 0.00882 | 0.00000 | 0.49746 |
| 4971 | 3454.74495 | 26.54112 | 24738.79536 | 68.57538  | 6.49371 | 0.00739 | 0.00000 | 1.08405 |
| 4972 | 3695.92159 | 22.11679 | 12620.34655 | 117.57277 | 4.73139 | 0.00210 | 0.00000 | 0.48541 |
| 4973 | 3686.81679 | 25.16102 | 14290.34080 | 69.46217  | 5.50765 | 0.00493 | 0.00000 | 0.43672 |
| 4974 | 3816.54177 | 23.10352 | 18398.27270 | 115.80014 | 4.68313 | 0.03490 | 0.00000 | 0.71370 |
| 4975 | 3407.45692 | 25.88582 | 14347.80879 | 92.86582  | 6.49748 | 0.05850 | 0.00000 | 1.11962 |
| 4976 | 3883.54935 | 19.66902 | 9061.79744  | 81.95338  | 3.92439 | 0.00864 | 0.00000 | 0.45355 |
| 4977 | 3454.43951 | 26.55140 | 24759.15443 | 82.07305  | 5.79114 | 0.00716 | 0.00000 | 1.03394 |
| 4978 | 3694.54895 | 22.11889 | 12589.88574 | 57.06055  | 4.08302 | 0.00206 | 0.00000 | 0.48152 |
| 4979 | 3685.23567 | 25.17838 | 14297.71356 | 104.93972 | 4.74822 | 0.00497 | 0.00000 | 0.41938 |
| 4980 | 3811.49760 | 23.09764 | 18428.98797 | 66.33432  | 4.02933 | 0.03560 | 0.00000 | 0.59038 |
| 4981 | 3407.67787 | 25.88494 | 14285.15865 | 94.04428  | 5.66703 | 0.05869 | 0.00000 | 0.97657 |
| 4982 | 3876.99403 | 19.65227 | 9047.52796  | 75.82644  | 3.85706 | 0.00946 | 0.00000 | 0.48307 |
| 4983 | 3453.25872 | 26.55488 | 24762.79599 | 71.70610  | 5.67573 | 0.00779 | 0.00000 | 1.03918 |
| 4984 | 3691.45763 | 22.08803 | 12589.55002 | 72.64921  | 3.97567 | 0.00215 | 0.00000 | 0.45396 |
| 4985 | 3681.50260 | 25.18174 | 14304.57968 | 94.78609  | 4.69030 | 0.00507 | 0.00000 | 0.44748 |
| 4986 | 3803.57579 | 23.06042 | 18482.28729 | 71.96241  | 3.95247 | 0.03705 | 0.00000 | 0.61497 |
| 4987 | 3407.26485 | 25.87941 | 14283.12411 | 79.16761  | 5.61082 | 0.05816 | 0.00000 | 0.98475 |
| 4988 | 3870.29459 | 19.59217 | 9043.62042  | 68.27921  | 4.39072 | 0.00939 | 0.00000 | 0.51248 |
| 4989 | 3457.36243 | 26.53531 | 24746.02162 | 60.20672  | 6.14465 | 0.00779 | 0.00000 | 1.04726 |
| 4990 | 3679.28796 | 22.02875 | 12582.22386 | 82.29422  | 4.47607 | 0.00240 | 0.00000 | 0.42690 |
| 4991 | 3670.80608 | 25.22826 | 14314.22366 | 51.07814  | 5.30621 | 0.00550 | 0.00000 | 0.47504 |
| 4992 | 3791.96281 | 23.01455 | 18541.75004 | 74.87670  | 4.54940 | 0.03797 | 0.00000 | 0.63968 |
| 4993 | 3407.41107 | 25.87756 | 14280.71371 | 53.34137  | 6.33552 | 0.06060 | 0.00000 | 0.99106 |
| 4994 | 3865.59447 | 19.58339 | 9048.25198  | 52.70691  | 4.79176 | 0.00961 | 0.00000 | 0.51950 |
| 4995 | 3449.34788 | 26.53549 | 24721.40940 | 61.71478  | 6.43535 | 0.00789 | 0.00000 | 1.01874 |
| 4996 | 3676.55232 | 22.07754 | 12550.36646 | 39.62526  | 4.78482 | 0.00241 | 0.00000 | 0.41626 |
| 4997 | 3780.05183 | 23.09368 | 18620.88836 | 41.50805  | 4.83950 | 0.03901 | 0.00000 | 0.68368 |
| 4998 | 3408.95846 | 25.87359 | 14275.70040 | 56.90699  | 6.32144 | 0.06082 | 0.00000 | 1.04908 |

## 1   **References**

- 2   Ahmad, M. W., Reynolds, J., and Rezgui, Y.: Predictive modelling for solar thermal energy systems: A  
3   comparison of support vector regression, random forest, extra trees and regression trees, *J. Clean.*  
4   *Prod.*, 203, 810-821, <https://doi.org/10.1016/j.jclepro.2018.08.207>, 2018.
- 5   Bermejo, S. and Cabestany, J.: Adaptive soft k-nearest-neighbour classifiers, *Pattern. Recogn.*, 33,  
6   1999-2005, [https://doi.org/10.1016/S0031-3203\(99\)00186-7](https://doi.org/10.1016/S0031-3203(99)00186-7), 2000.
- 7   Breiman, L.: Random Forests, *Mach. Learn.*, 45, 5-32, <https://doi.org/10.1023/A:1010933404324>,  
8   2001.
- 9   Bryan, B. A. and Adams, J. M.: Three-Dimensional Neurointerpolation of Annual Mean Precipitation  
10   and Temperature Surfaces for China, *Geographical Acta Ecologica Sinica* Analysis, 34, 111 - 193,  
11   <https://doi.org/10.1353/geo.2002.0007>, 2002.
- 12   Cao, G. M., Tang, Y. H., Mo, W. H., Wang, Y. S., Li, Y. N., and Zhao, X. Q.: Grazing intensity alters  
13   soil respiration in an alpine meadow on the Tibetan plateau, *Soil. Biol. Biochem.*, 36, 237-243,  
14   <https://doi.org/10.1016/j.soilbio.2003.09.010>, 2004.
- 15   Cho, D. J., Yoo, C., Im, J. G., Lee, Y., and Lee, J.: Improvement of spatial interpolation accuracy of  
16   daily maximum air temperature in urban areas using a stacking ensemble technique, *Gisci. Remote.*  
17   *Sens.*, 57, 633-649, <https://doi.org/10.1080/15481603.2020.1766768>, 2020.
- 18   Chu, H., Zhang, C. P., Dong, Q. M., Shang, Z. H., Degen, A. A., Yang, X. X., Yu, Y., Yang, Z. Z., and  
19   Zhang, Y. F.: The effect of grazing intensity and season on the soil seed bank and its relation with  
20   above-ground vegetation on the alpine steppe, *Agr. Ecosyst. Environ.*, 285, 106622,  
21   <https://doi.org/10.1016/j.agee.2019.106622>, 2019.
- 22   Cortes, C. and Vapnik, V.: Support-vector networks, *Mach. Learn.*, 20, 273-297,  
23   <https://doi.org/10.1007/BF00994018>, 1995.
- 24   Cover, T. and Hart, P.: Nearest neighbor pattern classification, *Ieee. T. Inform. Theory.*, 13, 21-27,  
25   <https://doi.org/10.1109/TIT.1967.1053964>, 1967.
- 26   Dong, Q. M., Zhao, X. Q., Wu, G. L., and Chang, X. F.: Optimization yak grazing stocking rate in an  
27   alpine grassland of Qinghai-Tibetan Plateau, China, *Environ. Earth. Sci.*, 73, 2497-2503,  
28   <https://doi.org/10.1007/s12665-014-3597-7>, 2014.
- 29   Friedman, J. H.: Greedy function approximation: a gradient boosting machine, *Ann. Stat.*, 29,  
30   1189-1232, <https://doi.org/10.1214/aos/1013203451>, 2001.
- 31   Geurts, P., Ernst, D., and Wehenkel, L.: Extremely randomized trees, *Mach. Learn.*, 63, 3-42,  
32   <https://doi.org/10.1007/s10994-006-6226-1>, 2006.
- 33   Gu, X. J. and zhou, Q.: Distribution characteristics of the quantity and structure of grazing livestock in  
34   the pastoral areas of Qinghai Province: A case study of Gander County Qinghai. *Huanjing.*, 30,  
35   200-215, 2020.
- 36   Hutchinson, M. F., McIntyre, S., Hobbs, R. J., Stein, J. L., Garnett, S. T., and Kinloch, J.: Integrating a  
37   global agro-climatic classification with bioregional boundaries in Australia, *Global. Ecol. Biogeogr.*,  
38   14, 197-212, <https://doi.org/10.1111/j.1466-822x.2005.00154.x>, 2005.
- 39   Lang, M., Li, P., Long, G. Q., Yuan, F. J., Yu, Y. J., Ma, E. D., Shan, J., Müller, C., and Zhu, T. B.:  
40   Grazing rest versus no grazing stimulates soil inorganic N turnover in the alpine grasslands of the  
41   Qinghai-Tibet plateau, *Catena.*, 204, 105382, <https://doi.org/10.1016/j.catena.2021.105382>, 2021.
- 42   Li, G., Zhang, Z., Shi, L. L., Zhou, Y., Yang, M., Cao, J. X., Wu, S. H., and Lei, G. C.: Effects of  
43   Different Grazing Intensities on Soil C, N, and P in an Alpine Meadow on the Qinghai—Tibetan

44 Plateau, China, *Int. J. Env. Res. Pub. He.*, 15, 2584, <https://doi.org/10.3390/ijerph15112584>, 2018.

45 Li, W., Cao, W. X., Liu, H. D., Li, X. L., Xu, C. L., Shi, S. L., Feng, J., and Zhou, C. M.: Analysis of  
46 soil respiration under different grazing management patterns in the alpine meadow-steppe of the  
47 Qinghai — Tibet Plateau, *Acta. Prataculturae. Sinica.*, 24, 22-32,  
48 <https://doi.org/10.11686/cyxb2015152>, 2015.

49 Meng, N., Wang, L. J., Qi, W. C., Dai, X. H., Li, Z. Z., Yang, Y. Z., Li, R. N., Ma, J. F., and Zheng, H.:  
50 A high-resolution gridded grazing dataset of grassland ecosystem on the Qinghai-Tibet Plateau in  
51 1982-2015, *Sci. Data.*, 10, 68, <https://doi.org/10.1038/s41597-023-01970-1>, 2023.

52 Naeem, S., Zhang, Y., Tian, J., Qamer, F. M., Latif, A., and Paul, P. K.: Quantifying the Impacts of  
53 Anthropogenic Activities and Climate Variations on Vegetation Productivity Changes in China from  
54 1985 to 2015, *Remote. Sens.*, 12, 1113, <https://doi.org/10.3390/rs12071113>, 2020.

55 Niu, Y. J., Yang, S. W., Wang, G. Z., Liu, L., Du, G. Z., and Hua, L. M.: Effects of grazing disturbance  
56 on soil properties and plant functional groups and their relationships in an alpine meadow on the  
57 Tibetan Plateau, China, *Acta. Ecologica. Sinica.*, 38, 5006-5016,  
58 <https://doi.org/10.5846/stxb201707061224>, 2018.

59 Parra, J. L. and Monahan, W. B.: Variability in 20th century climate change reconstructions and its  
60 consequences for predicting geographic responses of California mammals, *Glob. Chang. Biol.*, 14,  
61 2215-2231, <https://doi.org/10.1111/j.1365-2486.2008.01649.x>, 2008.

62 Price, D. T., McKenney, D. W., Nalder, I. A., Hutchinson, M. F., and Kesteven, J.: A comparison of two  
63 statistical methods for spatial interpolation of Canadian monthly mean climate data, *Agr. Forest.  
64 Meteorol.*, 101, 81-94, [https://doi.org/10.1016/S0168-1923\(99\)00169-0](https://doi.org/10.1016/S0168-1923(99)00169-0), 2000.

65 Qin, X., Liu, W. B., Mao, R. C., Song, J. X., Chen, Y. N., Ma, C., and Li, M. Y.: Quantitative  
66 assessment of driving factors affecting human appropriation of net primary production (HANPP) in  
67 the Qilian Mountains, China, *Ecol. Indic.*, 121, 106997,  
68 <https://doi.org/10.1016/j.ecolind.2020.106997>, 2021.

69 Shi, X. M., Li, X. G., Li, C. T., Zhao, Y., Shang, Z. H., and Ma, Q.: Grazing exclusion decreases soil  
70 organic C storage at an alpine grassland of the Qinghai–Tibetan Plateau, *Ecol. Eng.*, 57, 183-187,  
71 <https://doi.org/10.1016/j.ecoleng.2013.04.032>, 2013.

72 Smola, A. J. and Schölkopf, B.: A tutorial on support vector regression, *Stat. Comput.*, 14, 199-222,  
73 <https://doi.org/10.1023/B:STCO.0000035301.49549.88>, 2004.

74 Tajgardan, T., Ayoubi, S., Shataee, S., and Sahrawat, K. L.: Soil Surface Salinity Prediction Using  
75 ASTER Data: Comparing Statistical and Geostatistical Models, *Aust. J. Basic & Appl. Sci.*, 4,  
76 457-467, 2010.

77 Tan, J., Xie, X., Zuo, J., Xing, X., Liu, B., Xia, Q., and Zhang, Y.: Coupling random forest and inverse  
78 distance weighting to generate climate surfaces of precipitation and temperature with  
79 Multiple-Covariates, *J. Hydrol.*, 598, 126270, <https://doi.org/10.1016/j.jhydrol.2021.126270>, 2021.

80 Tserang, D., Wen, Y., Ai, Y., Zhao, H., and Chen, Y.: Impact of different grazing intensity on soil  
81 physical properties and plant biomass in Qinghai-Tibet Plateau alpine meadow ecosystem  
82 *Pratacultural. Science.*, 33, 1975-1980, <https://doi.org/10.11829/j.issn.1001-0629.2016-0152>, 2016.

83 Wang, J. L., Liu, Y. Z., Cao, W. X., Li, W., Wang, X. J., Zhang, D. G., Shi, S. L., Pan, D. F., and Liu, W.  
84 L.: Effects of grazing exclusion on soil respiration components in an alpine meadow on the  
85 north-eastern Qinghai-Tibet Plateau, *Catena.*, 194, 104750,  
86 <https://doi.org/10.1016/j.catena.2020.104750>, 2020.

87 Wu, T. M., Lin, H. L., Fan, D., Ji, C. T., Zhao, Y. T., and Wei, J. Q.: Factors influencing the scale of

88 herdsman's livestock farming in tundra alpine grassland-A case study from Qinghai Province, *Acta.*  
89 *Prataculturae. Sinica.*, 30, 117-126, <https://doi.org/10.11686/cyxb2020337>, 2021.

90 Xu, Y. F., Yixi, C. M., Fu, J. J., Chen, H., Miao, Y. J., Chen, J., Hu, T. M., and Shan, J. G.: Response of  
91 Plant Diversity and Soil Nutrient to Grazing Intensity in *Kobresia pygmaea* Meadow of  
92 Qinghai-Tibet Plateau. *Acta. Agrestia. Sinica.*, 20, 1026-2032, 2012.

93 Yoo, C., Im, J., Park, S., and Quackenbush, L. J.: Estimation of daily maximum and minimum air  
94 temperatures in urban landscapes using MODIS time series satellite data, *Isprs. J. Photogramm.*, 137,  
95 149-162, <https://doi.org/10.1016/j.isprsjprs.2018.01.018>, 2018.

96 Yu, H., Liu, B. T., Wang, G. X., Zhang, T. Z., Yang, Y., Lu, Y. Q., Xu, Y. X., Huang, M., Yang, Y., and  
97 Zhang, L.: Grass-livestock balance based grassland ecological carrying capability and sustainable  
98 strategy in the Yellow River Source National Park, Tibet Plateau, China, *J. Mt. Sci-Engl.*, 18,  
99 2201-2211, <https://doi.org/10.1007/s11629-020-6087-2>, 2021.

100 Zhuang, M. H., Gongbuzeren, Zhang, J., and Li, W. J.: Community-based seasonal movement grazing  
101 maintains lower greenhouse gas emission intensity on Qinghai-Tibet Plateau of China, *Land. Use.*  
102 *Policy.*, 85, 155-160, <https://doi.org/10.1016/j.landusepol.2019.03.032>, 2019.

103 Zou, J. R., Luo, C. Y., Xu, X. L., Zhao, N., Zhao, L., and Zhao, X. Q.: Relationship of plant diversity  
104 with litter and soil available nitrogen in an alpine meadow under a 9-year grazing exclusion, *Ecol.*  
105 *Res.*, 31, 841-851, <https://doi.org/10.1007/s11284-016-1394-3>, 2016.
